# Supplementary material for: Lymphocytic infiltration in stage II microsatellite stable colorectal tumors: A retrospective prognosis biomarker analysis
Source: PubMed Central journal article supplement (PMC7514069; doi:10.1371/journal.pmed.1003292), 2020-09-24
Supplement: pmed.1003292.s002.pdf [file pmed.1003292.s002.pdf]

| NAME                                       | SIZE | ES         | NES        | NOM p-val   | FDR q-val    | FWER p-val |
|--------------------------------------------|------|------------|------------|-------------|--------------|------------|
| HALLMARK_ALLOGRAFT_REJECTION               | 200  | 0.65954506 | 30.604.916 | 0.0         | 0.0          | 0.0        |
| HALLMARK_INTERFERON_GAMMA_RESPONSE         | 198  | 0.6578051  | 30.451.725 | 0.0         | 0.0          | 0.0        |
| HALLMARK_EPITHELIAL_MESENCHYMAL_TRANSITION | 198  | 0.6402159  | 29.477.346 | 0.0         | 0.0          | 0.0        |
| HALLMARK_INTERFERON_ALPHA_RESPONSE         | 94   | 0.6188131  | 26.063.433 | 0.0         | 0.0          | 0.0        |
| HALLMARK_INFLAMMATORY_RESPONSE             | 199  | 0.55809546 | 25.854.888 | 0.0         | 0.0          | 0.0        |
| HALLMARK_IL6_JAK_STAT3_SIGNALING           | 87   | 0.5835411  | 23.987.734 | 0.0         | 0.0          | 0.0        |
| HALLMARK_COMPLEMENT                        | 196  | 0.51860523 | 2.398.198  | 0.0         | 0.0          | 0.0        |
| HALLMARK_TNFA_SIGNALING_VIA_NFKB           | 199  | 0.48753825 | 22.684.073 | 0.0         | 0.0          | 0.0        |
| HALLMARK_IL2_STAT5_SIGNALING               | 199  | 0.47705644 | 22.233.922 | 0.0         | 0.0          | 0.0        |
| HALLMARK_MYOGENESIS                        | 200  | 0.4687525  | 21.808.493 | 0.0         | 0.0          | 0.0        |
| HALLMARK_KRAS_SIGNALING_UP                 | 199  | 0.4688729  | 21.723.757 | 0.0         | 0.0          | 0.0        |
| HALLMARK_COAGULATION                       | 136  | 0.44935197 | 19.731.516 | 0.0         | 5,70E+02     | 0.001      |
| HALLMARK_UV_RESPONSE_DN                    | 144  | 0.40001053 | 17.808.143 | 0.0         | 7,61E+02     | 0.014      |
| HALLMARK_APICAL_JUNCTION                   | 200  | 0.3812462  | 1.766.853  | 0.0         | 8,09E+02     | 0.016      |
| HALLMARK_ANGIOGENESIS                      | 36   | 0.47336802 | 16.311.126 | 0.015673982 | 0.0042660446 | 0.082      |
| HALLMARK_APICAL_SURFACE                    | 44   | 0.39148498 | 1.447.745  | 0.038772214 | 0.025452888  | 0.429      |
| HALLMARK_APOPTOSIS                         | 160  | 0.31525907 | 14.212.136 | 0.017711172 | 0.031019775  | 0.51       |

| KEGG NAME                                               | SIZE | ES         | NES        | NOM p-val   | FDR q-val   | FWER p-val |
|---------------------------------------------------------|------|------------|------------|-------------|-------------|------------|
| KEGG_HEMATOPOIETIC_CELL_LINEAGE                         | 86   | 0.66786736 | 27.774     | 0.0         | 0.0         | 0.0        |
| KEGG_INTESTINAL_IMMUNE_NETWORK_FOR_IGA_PRODUCTION       | 47   | 0.71539855 | 265.024    | 0.0         | 0.0         | 0.0        |
| KEGG_CYTOKINE_CYTOKINE_RECEPTOR_INTERACTION             | 259  | 0.5432273  | 2.598.793  | 0.0         | 0.0         | 0.0        |
| KEGG_CELL_ADHESION_MOLECULES_CAMS                       | 132  | 0.5829304  | 25.668.385 | 0.0         | 0.0         | 0.0        |
| KEGG_PRIMARY_IMMUNODEFICIENCY                           | 35   | 0.7429938  | 25.488.887 | 0.0         | 0.0         | 0.0        |
| KEGG_CHEMOKINE_SIGNALING_PATHWAY                        | 187  | 0.53537685 | 24.813.821 | 0.0         | 0.0         | 0.0        |
| KEGG_ALLOGRAFT_REJECTION                                | 36   | 0.72263795 | 24.768.922 | 0.0         | 0.0         | 0.0        |
| KEGG_T_CELL_RECEPTOR_SIGNALING_PATHWAY                  | 107  | 0.56864935 | 24.349.632 | 0.0         | 0.0         | 0.0        |
| KEGG_AUTOIMMUNE_THYROID_DISEASE                         | 51   | 0.64746433 | 24.240.677 | 0.0         | 0.0         | 0.0        |
| KEGG_GRAFT_VERSUS_HOST_DISEASE                          | 38   | 0.68133885 | 24.037.645 | 0.0         | 0.0         | 0.0        |
| KEGG_B_CELL_RECEPTOR_SIGNALING_PATHWAY                  | 74   | 0.576736   | 23.310.935 | 0.0         | 0.0         | 0.0        |
| KEGG_ANTIGEN_PROCESSING_AND_PRESENTATION                | 81   | 0.56828386 | 2.323.671  | 0.0         | 0.0         | 0.0        |
| KEGG_LEISHMANIA_INFECTION                               | 71   | 0.59025836 | 23.190.527 | 0.0         | 0.0         | 0.0        |
| KEGG_NATURAL_KILLER_CELL_MEDIATED_CYTOTOXICITY          | 131  | 0.52912164 | 23.166.835 | 0.0         | 0.0         | 0.0        |
| KEGG_ASTHMA                                             | 29   | 0.69339174 | 22.889.016 | 0.0         | 0.0         | 0.0        |
| KEGG_SYSTEMIC_LUPUS_ERYTHEMATOSUS                       | 134  | 0.52095383 | 228.618    | 0.0         | 0.0         | 0.0        |
| KEGG_VIRAL_MYOCARDITIS                                  | 69   | 0.5742115  | 22.826.939 | 0.0         | 0.0         | 0.0        |
| KEGG_ECM_RECEPTOR_INTERACTION                           | 84   | 0.5282363  | 2.139.758  | 0.0         | 0.0         | 0.0        |
| KEGG_FOCAL_ADHESION                                     | 199  | 0.44403663 | 20.619.285 | 0.0         | 9,69E+01    | 0.002      |
| KEGG_LEUKOCYTE_TRANSENDOTHELIAL_MIGRATION               | 116  | 0.47120455 | 20.403.166 | 0.0         | 9,21E+02    | 0.002      |
| KEGG_COMPLEMENT_AND_COAGULATION_CASCADES                | 69   | 0.51670015 | 20.353.947 | 0.0         | 8,77E+01    | 0.002      |
| KEGG_JAK_STAT_SIGNALING_PATHWAY                         | 151  | 0.4485636  | 20.241.401 | 0.0         | 1,70E+03    | 0.004      |
| KEGG_VASCULAR_SMOOTH_MUSCLE_CONTRACTION                 | 115  | 0.46458596 | 20.040.631 | 0.0         | 1,62E+03    | 0.004      |
| KEGG_TYPE_I_DIABETES_MELLITUS                           | 42   | 0.554291   | 19.636.563 | 0.0         | 4,34E+03    | 0.011      |
| KEGG_TOLL LIKE RECEPTOR SIGNALING PATHWAY               | 102  | 0.44321477 | 18.584.768 | 0.0         | 0.002220317 | 0.058      |
| KEGG_CALCIIUM_SIGNALING_PATHWAY                         | 176  | 0.4015889  | 18.292.779 | 0.0         | 0.003402229 | 0.091      |
| KEGG_FC_EPSILON_RI_SIGNALING_PATHWAY                    | 79   | 0.4564137  | 18.170.536 | 0.0         | 0.004017369 | 0.111      |
| KEGG_GLYCOSAMINOGLYCAN_BIOSYNTHESIS_CHONDROITIN_SULFATE | 22   | 0.5732019  | 17.831.968 | 0.0         | 0.005975941 | 0.163      |
| KEGG_LYSOSOME                                           | 119  | 0.4066158  | 17.654.738 | 0.0         | 0.007156598 | 0.197      |
| KEGG_NEUROACTIVE_LIGAND_RECEPTOR_INTERACTION            | 270  | 0.36544958 | 17.496.089 | 0.0         | 0.008358413 | 0.235      |
| KEGG_DILATED_CARDIOMYOPATHY                             | 90   | 0.41267177 | 17.196.529 | 0.001434720 | 0.01171304  | 0.323      |
| KEGG_FC_GAMMA_R_MEDIATED_PHAGOCYTOSIS                   | 96   | 0.40951335 | 17.078.953 | 0.0         | 0.01274488  | 0.35       |
| KEGG_NOD LIKE RECEPTOR SIGNALING PATHWAY                | 62   | 0.4301662  | 16.796.834 | 0.012539185 | 0.017158898 | 0.455      |
| KEGG_CYTOSOLIC_DNA_SENSING_PATHWAY                      | 55   | 0.4406829  | 16.688.124 | 0.00625     | 0.018578207 | 0.491      |
| KEGG_REGULATION_OF_ACTIN_CYTOSKELETON                   | 212  | 0.34762174 | 16.237.423 | 0.0         | 0.027409848 | 0.644      |
| KEGG_GAP_JUNCTION                                       | 90   | 0.38184446 | 15.741.663 | 0.011594203 | 0.040126983 | 0.786      |
| KEGG_ALDOSTERONE_REGULATED_SODIUM_REABSORPTION          | 42   | 0.433548   | 15.723.605 | 0.018897638 | 0.039587628 | 0.788      |
| KEGG_APOPTOSIS                                          | 86   | 0.37838218 | 156.782    | 0.007173601 | 0.040151045 | 0.803      |

| REACTOME NAME                                                                         | SIZE | ES         | NES        | NOM p-val    | FDR q-val    | FWER p-val |
|---------------------------------------------------------------------------------------|------|------------|------------|--------------|--------------|------------|
| REACTOME_IMMUNOREGULATORY_INTERACTIONS_BETWEEN_A_LYMPHOID_AND_A_NON_LYMPHOID_CELL     | 61   | 0.718359   | 28.367.887 | 0.0          | 0.0          | 0.0        |
| REACTOME_INTERFERON_GAMMA_SIGNALING                                                   | 59   | 0.708568   | 2.725.301  | 0.0          | 0.0          | 0.0        |
| REACTOME_GENERATION_OF_SECOND_MESSENGER_MOLECULES                                     | 26   | 0.81348026 | 2.609.139  | 0.0          | 0.0          | 0.0        |
| REACTOME_CHEMOKINE_RECEPTORS_BIND_CHEMOKINES                                          | 51   | 0.70387423 | 26.048.827 | 0.0          | 0.0          | 0.0        |
| REACTOME_TCR_SIGNALING                                                                | 51   | 0.6732419  | 25.200.708 | 0.0          | 0.0          | 0.0        |
| REACTOME_INTERFERON_ALPHA_BETA_SIGNALING                                              | 62   | 0.60343117 | 23.593.645 | 0.0          | 0.0          | 0.0        |
| REACTOME_G_ALPHA_I_SIGNALLING_EVENTS                                                  | 189  | 0.5083344  | 23.456.109 | 0.0          | 0.0          | 0.0        |
| REACTOME_PD1_SIGNALING                                                                | 17   | 0.81113756 | 2.341.908  | 0.0          | 0.0          | 0.0        |
| REACTOME_PHOSPHORYLATION_OF_CD3_AND_TCR_ZETA_CHAINS                                   | 15   | 0.8345406  | 23.310.616 | 0.0          | 0.0          | 0.0        |
| REACTOME_COLLAGEN_FORMATION                                                           | 56   | 0.60145164 | 23.046.818 | 0.0          | 0.0          | 0.0        |
| REACTOME_CLASS_A1_RHODOPSIN_LIKE_RECEPTORS                                            | 288  | 0.47811848 | 23.013.976 | 0.0          | 0.0          | 0.0        |
| REACTOME_EXTRACELLULAR_MATRIX_ORGANIZATION                                            | 84   | 0.55225116 | 22.808.762 | 0.0          | 0.0          | 0.0        |
| REACTOME_ANTIGEN_ACTIVATES_B_CELL_RECEPTOR_LEADING_TO_GENERATION_OF_SECOND_MESSENGERS | 29   | 0.61899626 | 2.067.539  | 0.0          | 7,31E+01     | 0.019      |
| REACTOME_COMPLEMENT_CASCADE                                                           | 29   | 0.6228899  | 2.089.955  | 0.0          | 5,28E+02     | 0.013      |
| REACTOME_INTEGRIN_CELL_SURFACE_INTERACTIONS                                           | 79   | 0.509152   | 20.591.643 | 0.0          | 7,31E+02     | 0.02       |
| REACTOME_PEPTIDE_LIGAND_BINDING_RECEPTORS                                             | 176  | 0.4703581  | 21.652.117 | 0.0          | 2,32E+03     | 0.004      |
| REACTOME_GPCR_LIGAND_BINDING                                                          | 389  | 0.43431646 | 21.509.857 | 0.0          | 2,64E+03     | 0.005      |
| REACTOME_DOWNSTREAM_TCR_SIGNALING                                                     | 34   | 0.6212139  | 21.192.684 | 0.0          | 3,64E+03     | 0.008      |
| REACTOME_COSTIMULATION_BY_THE_CD28_FAMILY                                             | 61   | 0.5445732  | 21.074.307 | 0.0          | 3,86E+03     | 0.009      |
| REACTOME_SMOOTH_MUSCLE_CONTRACTION                                                    | 23   | 0.6697147  | 21.297.133 | 0.0          | 3,88E+03     | 0.008      |
| REACTOME_INTERFERON_SIGNALING                                                         | 153  | 0.4565251  | 20.451.531 | 0.0          | 8,01E+03     | 0.023      |
| REACTOME_CELL_SURFACE_INTERACTIONS_AT_THE_VASCULAR_WALL                               | 84   | 0.50357604 | 20.338.137 | 0.0          | 0.00102909   | 0.031      |
| REACTOME_PLATELET_ACTIVATION_SIGNALING_AND_AGGREGATION                                | 198  | 0.43668813 | 20.184.703 | 0.0          | 0.0012982601 | 0.041      |
| REACTOME_THE_ROLE_OF_NEF_IN_HIV1_REPLICATION_AND_DISEASE_PATHOGENESIS                 | 27   | 0.6156036  | 20.063.546 | 0.0          | 0.0015156454 | 0.05       |
| REACTOME_CYTOKINE_SIGNALING_IN_IMMUNE_SYSTEM                                          | 263  | 0.41851756 | 198.909    | 0.0          | 0.0019180671 | 0.065      |
| REACTOME_SIGNALING_BY_RHO_GTPASES                                                     | 111  | 0.4626563  | 19.772.524 | 0.0          | 0.0019777652 | 0.075      |
| REACTOME_CHONDROITIN_SULFATE_BIOSYNTHESIS                                             | 19   | 0.68106335 | 19.845.308 | 0.0017006802 | 0.0019855907 | 0.07       |
| REACTOME_NITRIC_OXIDE_STIMULATES_GUANYLATE_CYCLASE                                    | 25   | 0.6172129  | 19.800.271 | 0.0016750418 | 0.0020222228 | 0.074      |
| REACTOME_RNA_POL_I_PROMOTER_OPENING                                                   | 59   | 0.5135674  | 19.665.416 | 0.0          | 0.0021866228 | 0.085      |
| REACTOME_OTHER_SEMAPHORIN_INTERACTIONS                                                | 15   | 0.6994511  | 19.605.584 | 0.0          | 0.0023295432 | 0.094      |
| REACTOME_NUCLEOTIDE_LIKE_PURINERGIC_RECEPTORS                                         | 16   | 0.6851306  | 19.570.564 | 0.0          | 0.0023715028 | 0.098      |
| REACTOME_GPMV_MEDIATED_ACTIVATION_CASCADE                                             | 31   | 0.5762875  | 19.518.225 | 0.001633987  | 0.0025471437 | 0.108      |
| REACTOME_CHONDROITIN_SULFATE_DERMATAN_SULFATE_METABOLISM                              | 47   | 0.5238685  | 19.327.179 | 0.0          | 0.0031272268 | 0.14       |
| REACTOME_MUSCLE_CONTRACTION                                                           | 46   | 0.5319804  | 19.334.052 | 0.0          | 0.0032003721 | 0.139      |
| REACTOME_HEMOSTASIS                                                                   | 451  | 0.38376668 | 1.924.031  | 0.0          | 0.0033513162 | 0.152      |
| REACTOME_RESPONSE_TO_ELEVATED_PLATELET_CYTOSOLIC_CA2                                  | 81   | 0.46887857 | 19.206.111 | 0.0          | 0.003377139  | 0.158      |
| REACTOME_INNATE_IMMUNE_SYSTEM                                                         | 267  | 0.39893392 | 1.911.258  | 0.0          | 0.003736822  | 0.179      |
| REACTOME_G_BETA_GAMMA_SIGNALING_THROUGH_PI3KGAMMA                                     | 25   | 0.57070225 | 18.573.465 | 0.0          | 0.006912913  | 0.321      |
| REACTOME_IL_3_5_AND_GM-CSF_SIGNALING                                                  | 43   | 0.51435065 | 18.584.383 | 0.003194888  | 0.0070198028 | 0.318      |
| REACTOME_HDL_MEDIATED_LIPID_TRANSPORT                                                 | 15   | 0.6648322  | 18.438.634 | 0.005357143  | 0.007846906  | 0.36       |
| REACTOME_G_ALPHA_Z_SIGNALLING_EVENTS                                                  | 44   | 0.5020078  | 1.834.757  | 0.0          | 0.008024695  | 0.379      |
| REACTOME_G_ALPHA_S_SIGNALLING_EVENTS                                                  | 120  | 0.42275086 | 18.364.906 | 0.0          | 0.008094908  | 0.377      |
| REACTOME_CGMP_EFFECTS                                                                 | 19   | 0.61293036 | 18.061.836 | 0.0034843208 | 0.0105980358 | 0.479      |
| REACTOME_G_PROTEIN_BETA_GAMMA_SIGNALING                                               | 28   | 0.5526722  | 1.800.019  | 0.0          | 0.010938269  | 0.502      |
| REACTOME_TOLL_RECEPTOR_CASCADES                                                       | 113  | 0.41924983 | 17.954.698 | 0.0          | 0.011135153  | 0.518      |
| REACTOME_PLATELET_HOMEOSTASIS                                                         | 76   | 0.43823305 | 17.725.958 | 0.0          | 0.013720349  | 0.609      |
| REACTOME_IL_RECEPTOR_SHC_SIGNALING                                                    | 27   | 0.543565   | 17.737.088 | 0.0048       | 0.0138921638 | 0.604      |
| REACTOME_LATENT_INFECTION_OF_HOMO_SAPIENS_WITH_MYCOBACTERIUM_TUBERCULOSIS             | 31   | 0.5260831  | 17.698.407 | 0.0050847458 | 0.013920494  | 0.62       |
| REACTOME_SIGNALING_BY_ILS                                                             | 106  | 0.41135067 | 17.592.843 | 0.0          | 0.0152868948 | 0.66       |
| REACTOME_G_ALPHA_Q_SIGNALLING_EVENTS                                                  | 179  | 0.38146967 | 17.374.412 | 0.0          | 0.018782137  | 0.745      |
| REACTOME_SEMAPHORIN_INTERACTIONS                                                      | 65   | 0.44010365 | 17.181.596 | 0.002994012  | 0.022126712  | 0.819      |
| REACTOME_GLYCOSAMINOGLYCAN_METABOLISM                                                 | 108  | 0.4023834  | 17.130.022 | 0.0          | 0.022734208  | 0.833      |
| REACTOME_REGULATION_OF_IFNA_SIGNALING                                                 | 24   | 0.5337077  | 17.080.265 | 0.010291595  | 0.023469387  | 0.845      |
| REACTOME_DEGRADATION_OF_THE_EXTRACELLULAR_MATRIX                                      | 28   | 0.51815176 | 17.039.981 | 0.011784512  | 0.0239918    | 0.853      |
| REACTOME_PACKAGING_OF_TELOMERE_ENDS                                                   | 48   | 0.454819   | 16.880.409 | 0.004709576  | 0.026797634  | 0.882      |
| REACTOME_REGULATION_OF_WATER_BALANCE_BY_RENAL_AQUAPORINS                              | 43   | 0.46910393 | 16.896.348 | 0.0          | 0.026918879  | 0.876      |
| REACTOME_IL_2_SIGNALING                                                               | 41   | 0.46615377 | 16.824.304 | 0.0032051282 | 0.027793564  | 0.898      |
| REACTOME_INFLAMMASOMES                                                                | 16   | 0.5771901  | 16.419.561 | 0.020905923  | 0.03923497   | 0.963      |
| REACTOME_GASTRIN_CREB_SIGNALLING_PATHWAY_VIA_PKC_AND_MAPK                             | 200  | 0.35438177 | 16.379.312 | 0.0          | 0.039970912  | 0.965      |
| REACTOME_GROWTH_HORMONE_RECEPTOR_SIGNALING                                            | 24   | 0.52339494 | 16.145.476 | 0.026622295  | 0.0481014    | 0.983      |
| REACTOME_A_TETRASACCHARIDE_LINKER_SEQUENCE_IS_REQUIRED_FOR_GAG_SYNTHESIS              | 25   | 0.5137633  | 16.119.252 | 0.024590164  | 0.04835096   | 0.985      |
| REACTOME_AMYLOIDS                                                                     | 79   | 0.39912745 | 16.091.101 | 0.0043923864 | 0.048572548  | 0.985      |

| BIOCARTA NAME             | SIZE | ES         | NES        | NOM p-val    | FDR q-val    | FWER p-val |
|---------------------------|------|------------|------------|--------------|--------------|------------|
| BIOCARTA_CTLA4_PATHWAY    | 19   | 0.85563767 | 25.617.323 | 0.0          | 0.0          | 0.0        |
| BIOCARTA_NO2IL12_PATHWAY  | 17   | 0.84340125 | 24.515.026 | 0.0          | 0.0          | 0.0        |
| BIOCARTA_IL17_PATHWAY     | 15   | 0.8579667  | 23.623.898 | 0.0          | 0.0          | 0.0        |
| BIOCARTA_TCR_PATHWAY      | 44   | 0.6571596  | 23.576.927 | 0.0          | 0.0          | 0.0        |
| BIOCARTA_CSK_PATHWAY      | 22   | 0.7381113  | 2.316.923  | 0.0          | 0.0          | 0.0        |
| BIOCARTA_NKT_PATHWAY      | 29   | 0.70380306 | 23.032.966 | 0.0          | 0.0          | 0.0        |
| BIOCARTA_IL12_PATHWAY     | 21   | 0.7348455  | 2.292.049  | 0.0          | 0.0          | 0.0        |
| BIOCARTA_COMP_PATHWAY     | 19   | 0.74640065 | 22.537.692 | 0.0          | 0.0          | 0.0        |
| BIOCARTA_LAIR_PATHWAY     | 17   | 0.72845685 | 2.081.567  | 0.0          | 9,35E+02     | 0.009      |
| BIOCARTA_TH1TH2_PATHWAY   | 19   | 0.7516521  | 22.255.118 | 0.0          | 1,30E+01     | 0.001      |
| BIOCARTA_TNFR2_PATHWAY    | 18   | 0.69820565 | 20.890.646 | 0.0017064846 | 0.0010197469 | 0.009      |
| BIOCARTA_TOB1_PATHWAY     | 19   | 0.7046013  | 20.896.668 | 0.0          | 0.0011217215 | 0.009      |
| BIOCARTA_IL7_PATHWAY      | 17   | 0.6927927  | 2.000.849  | 0.0          | 0.0019638815 | 0.024      |
| BIOCARTA_IL22BP_PATHWAY   | 16   | 0.70446384 | 20.142.424 | 0.0          | 0.0019850458 | 0.021      |
| BIOCARTA_CD40_PATHWAY     | 15   | 0.71567136 | 20.041.025 | 0.0          | 0.002024713  | 0.023      |
| BIOCARTA_FCER1_PATHWAY    | 38   | 0.5478516  | 191.945    | 0.0          | 0.0054076253 | 0.07       |
| BIOCARTA_DC_PATHWAY       | 22   | 0.61220187 | 19.038.188 | 0.0          | 0.005907146  | 0.081      |
| BIOCARTA_BCR_PATHWAY      | 34   | 0.53356117 | 18.486.905 | 0.0017271157 | 0.0115060285 | 0.161      |
| BIOCARTA_IL3_PATHWAY      | 15   | 0.641326   | 18.432.877 | 0.0070422534 | 0.01163277   | 0.177      |
| BIOCARTA_IL2RB_PATHWAY    | 38   | 0.5240392  | 1.844.801  | 0.0          | 0.011848091  | 0.171      |
| BIOCARTA_STATHMIN_PATHWAY | 19   | 0.61326396 | 1.817.781  | 0.0034246575 | 0.014420791  | 0.223      |
| BIOCARTA_NKCELLS_PATHWAY  | 20   | 0.59149075 | 1.782.945  | 0.0050847456 | 0.020287093  | 0.306      |
| BIOCARTA_PDGF_PATHWAY     | 32   | 0.5164165  | 17.646.595 | 0.005        | 0.023555893  | 0.366      |
| BIOCARTA_HDAC_PATHWAY     | 29   | 0.5287556  | 17.539.786 | 0.0082236845 | 0.024845824  | 0.394      |
| BIOCARTA_TPO_PATHWAY      | 24   | 0.5426781  | 17.360.256 | 0.006779661  | 0.028799817  | 0.456      |
| BIOCARTA_PAR1_PATHWAY     | 37   | 0.48905346 | 17.139.522 | 0.0080256825 | 0.033256434  | 0.517      |
| BIOCARTA_IL10_PATHWAY     | 17   | 0.5967887  | 1.709.822  | 0.005586592  | 0.03353707   | 0.533      |
| BIOCARTA_TALL1_PATHWAY    | 15   | 0.60002726 | 16.903.695 | 0.020373514  | 0.039202284  | 0.602      |
| BIOCARTA_CCR5_PATHWAY     | 17   | 0.58936876 | 16.832.545 | 0.012635379  | 0.04040812   | 0.625      |
| BIOCARTA_IL2_PATHWAY      | 22   | 0.5345735  | 16.701.863 | 0.013722127  | 0.044270087  | 0.665      |

| GO Biological Process NAME                                                    | SIZE | ES         | NES        | NOM p-val   | FDR q-val   | FWER p-val |
|-------------------------------------------------------------------------------|------|------------|------------|-------------|-------------|------------|
| IMMUNE_RESPONSE                                                               | 227  | 0.63228106 | 29.895.208 | 0.0         | 0.0         | 0.0        |
| IMMUNE_SYSTEM_PROCESS                                                         | 322  | 0.5936385  | 29.025.872 | 0.0         | 0.0         | 0.0        |
| DEFENSE_RESPONSE                                                              | 266  | 0.5660546  | 27.186.503 | 0.0         | 0.0         | 0.0        |
| LEUKOCYTE_ACTIVATION                                                          | 69   | 0.66658115 | 26.457.381 | 0.0         | 0.0         | 0.0        |
| CELL_ACTIVATION                                                               | 76   | 0.654515   | 263.988    | 0.0         | 0.0         | 0.0        |
| CELLULAR_DEFENSE_RESPONSE                                                     | 56   | 0.6912161  | 26.322.377 | 0.0         | 0.0         | 0.0        |
| T_CELL_ACTIVATION                                                             | 44   | 0.7188982  | 26.243.777 | 0.0         | 0.0         | 0.0        |
| LYMPHOCYTE_ACTIVATION                                                         | 61   | 0.6700502  | 25.836.303 | 0.0         | 0.0         | 0.0        |
| REGULATION_OF_IMMUNE_SYSTEM_PROCESS                                           | 65   | 0.65376556 | 25.631.182 | 0.0         | 0.0         | 0.0        |
| POSITIVE_REGULATION_OF_IMMUNE_SYSTEM_PROCESS                                  | 50   | 0.643112   | 2.420.448  | 0.0         | 0.0         | 0.0        |
| REGULATION_OF_IMMUNE_RESPONSE                                                 | 32   | 0.69299644 | 23.631.847 | 0.0         | 0.0         | 0.0        |
| ADAPTIVE_IMMUNE_RESPONSE                                                      | 25   | 0.7302427  | 23.234.255 | 0.0         | 0.0         | 0.0        |
| POSITIVE_REGULATION_OF_MULTICELLULAR_ORGANISMAL_PROCESS                       | 65   | 0.591635   | 23.187.006 | 0.0         | 0.0         | 0.0        |
| REGULATION_OF_MULTICELLULAR_ORGANISMAL_PROCESS                                | 148  | 0.5163901  | 2.318.663  | 0.0         | 0.0         | 0.0        |
| IMMUNE_EFFECTOR_PROCESS                                                       | 36   | 0.658192   | 22.951.581 | 0.0         | 0.0         | 0.0        |
| LOCOMOTORY_BEHAVIOR                                                           | 93   | 0.5487351  | 2.286.494  | 0.0         | 0.0         | 0.0        |
| INFLAMMATORY_RESPONSE                                                         | 129  | 0.5229412  | 2.279.535  | 0.0         | 0.0         | 0.0        |
| REGULATION_OF_LYMPHOCYTE_ACTIVATION                                           | 35   | 0.6717722  | 22.696.078 | 0.0         | 0.0         | 0.0        |
| ADAPTIVE_IMMUNE_RESPONSE_GO_0002460                                           | 24   | 0.7359212  | 22.598.512 | 0.0         | 0.0         | 0.0        |
| REGULATION_OF_T_CELL_ACTIVATION                                               | 28   | 0.6672026  | 2.249.235  | 0.0         | 4,69E-01    | 0.001      |
| RESPONSE_TO_WOUNDING                                                          | 189  | 0.48526046 | 22.168.813 | 0.0         | 8,61E+01    | 0.002      |
| POSITIVE_REGULATION_OF_LYMPHOCYTE_ACTIVATION                                  | 24   | 0.6564124  | 20.620.751 | 0.0         | 9,78E+01    | 0.034      |
| POSITIVE_REGULATION_OF_IMMUNE_RESPONSE                                        | 28   | 0.68912363 | 22.431.366 | 0.0         | 4,46E+02    | 0.001      |
| T_CELL_DIFFERENTIATION                                                        | 15   | 0.7949263  | 2.196.726  | 0.0         | 8,24E+02    | 0.002      |
| CELL_RECOGNITION                                                              | 19   | 0.6838339  | 20.595.014 | 0.001655629 | 9,49E+02    | 0.035      |
| ACTIVATION_OF_IMMUNE_RESPONSE                                                 | 17   | 0.7233281  | 20.598.605 | 0.0         | 9,77E+02    | 0.035      |
| CATION_HOMEOSTASIS                                                            | 109  | 0.5024654  | 21.780.257 | 0.0         | 1,15E+03    | 0.003      |
| RESPONSE_TO_OTHER_ORGANISM                                                    | 79   | 0.5387688  | 21.734.948 | 0.0         | 1,45E+03    | 0.004      |
| RESPONSE_TO_EXTERNAL_STIMULUS                                                 | 309  | 0.4385982  | 21.423.945 | 0.0         | 2,01E+03    | 0.006      |
| RESPONSE_TO_VIRUS                                                             | 46   | 0.5854942  | 21.512.542 | 0.0         | 2,09E+03    | 0.006      |
| RESPONSE_TO_BIOTIC_STIMULUS                                                   | 115  | 0.4880977  | 21.218.016 | 0.0         | 4,55E+03    | 0.014      |
| POSITIVE_REGULATION_OF_CYTOKINE_BIOSYNTHETIC_PROCESS                          | 25   | 0.6624339  | 21.162.274 | 0.001663893 | 4,71E+03    | 0.015      |
| CYTOKINE_PRODUCTION                                                           | 73   | 0.525356   | 21.035.068 | 0.0         | 5,00E+03    | 0.017      |
| BEHAVIOR                                                                      | 150  | 0.47117147 | 21.079.905 | 0.0         | 5,17E+03    | 0.017      |
| MULTI_ORGANISM_PROCESS                                                        | 160  | 0.45849475 | 20.581.217 | 0.0         | 9,22E+03    | 0.035      |
| HUMORAL_IMMUNE_RESPONSE                                                       | 32   | 0.6017262  | 20.504.506 | 0.0         | 9,49E+03    | 0.037      |
| CELLULAR_CATION_HOMEOSTASIS                                                   | 106  | 0.5064053  | 21.843.467 | 0.0         | 1,20E+04    | 0.003      |
| POSITIVE_REGULATION_OF_RESPONSE_TO_STIMULUS                                   | 40   | 0.57164496 | 20.310.771 | 0.0         | 0.001121470 | 0.046      |
| REGULATION_OF_RESPONSE_TO_STIMULUS                                            | 57   | 0.53111786 | 20.327.895 | 0.0         | 0.001126999 | 0.045      |
| HEMOPOIETIC_OR_LYMPHOID_ORGAN_DEVELOPMENT                                     | 75   | 0.4953065  | 20.119.607 | 0.0         | 0.001322963 | 0.057      |
| POSITIVE_REGULATION_OF_T_CELL_ACTIVATION                                      | 21   | 0.6556149  | 20.147.245 | 0.005376344 | 0.001332353 | 0.056      |
| HEMOPOIESIS                                                                   | 73   | 0.5006063  | 20.033.736 | 0.0         | 0.001427530 | 0.062      |
| MESODERM_DEVELOPMENT                                                          | 22   | 0.64327556 | 19.928.257 | 0.001757469 | 0.001512717 | 0.068      |
| IMMUNE_SYSTEM_DEVELOPMENT                                                     | 79   | 0.49045104 | 1.997.399  | 0.0         | 0.001547896 | 0.068      |
| SECOND_MESSENGER_MEDIATED_SIGNALING                                           | 153  | 0.44405448 | 19.834.019 | 0.0         | 0.001562939 | 0.072      |
| ION_HOMEOSTASIS                                                               | 129  | 0.457172   | 19.667.604 | 0.0         | 0.001817955 | 0.085      |
| CHEMICAL_HOMEOSTASIS                                                          | 155  | 0.43853208 | 19.635.936 | 0.0         | 0.001961744 | 0.094      |
| REGULATION_OF_CYTOKINE_BIOSYNTHETIC_PROCESS                                   | 38   | 0.56306064 | 19.579.924 | 0.0         | 0.002159565 | 0.102      |
| LYMPHOCYTE_DIFFERENTIATION                                                    | 26   | 0.60034925 | 19.129.399 | 0.0         | 0.003624265 | 0.167      |
| SKELETAL_DEVELOPMENT                                                          | 102  | 0.45102438 | 18.995.289 | 0.0         | 0.00417938  | 0.191      |
| RAS_PROTEIN_SIGNAL_TRANSDUCTION                                               | 66   | 0.48192683 | 1.888.891  | 0.0         | 0.004526505 | 0.209      |
| HOMOPHILIC_CELL_ADHESION                                                      | 16   | 0.67458194 | 18.819.011 | 0.001757469 | 0.004837112 | 0.228      |
| G_PROTEIN_COUPLED_RECEPTOR_PROTEIN_SIGNALING_PATHWAY                          | 335  | 0.38579676 | 18.765.795 | 0.0         | 0.004975934 | 0.241      |
| POSITIVE_REGULATION_OF_TRANSLATION                                            | 34   | 0.54947275 | 18.781.819 | 0.0         | 0.004996984 | 0.238      |
| B_CELL_ACTIVATION                                                             | 20   | 0.62289953 | 18.725.072 | 0.001742160 | 0.005110951 | 0.251      |
| PHAGOCYTOSIS                                                                  | 17   | 0.65807605 | 18.663.064 | 0.001739130 | 0.005390647 | 0.265      |
| MUSCLE_DEVELOPMENT                                                            | 93   | 0.44659063 | 18.556.085 | 0.0         | 0.005971176 | 0.299      |
| CYTOKINE_BIOSYNTHETIC_PROCESS                                                 | 41   | 0.5201756  | 18.572.593 | 0.003115264 | 0.005975106 | 0.295      |
| CELL_SUBSTRATE_ADHESION                                                       | 38   | 0.5298969  | 18.515.269 | 0.0         | 0.006126457 | 0.313      |
| CYTOKINE_METABOLIC_PROCESS                                                    | 42   | 0.5050512  | 18.420.597 | 0.0         | 0.006595450 | 0.336      |
| CELLULAR_HOMEOSTASIS                                                          | 146  | 0.4099782  | 18.424.319 | 0.0         | 0.006705374 | 0.336      |
| JAK_STAT_CASCADE                                                              | 30   | 0.54946035 | 18.174.378 | 0.0         | 0.008762991 | 0.442      |
| LEUKOCYTE_DIFFERENTIATION                                                     | 37   | 0.5198093  | 18.179.035 | 0.003262642 | 0.008843429 | 0.439      |
| CYTOKINE_SECRETION                                                            | 18   | 0.6214166  | 18.110.441 | 0.005084745 | 0.009238741 | 0.465      |
| CELL_MATRIX_ADHESION                                                          | 37   | 0.5139995  | 18.081.076 | 0.001592356 | 0.009315713 | 0.473      |
| NEGATIVE_REGULATION_OF_MULTICELLULAR_ORGANISMAL_PROCESS                       | 31   | 0.5361956  | 1.803.915  | 0.001639344 | 0.009564479 | 0.488      |
| T_CELL_PROLIFERATION                                                          | 19   | 0.6020914  | 17.927.402 | 0.001751313 | 0.010702862 | 0.529      |
| REGULATION_OF_DEFENSE_RESPONSE                                                | 19   | 0.6059867  | 17.878.616 | 0.007029877 | 0.010915992 | 0.545      |
| G_PROTEIN_SIGNALING_COUPLED_TO_CYCLIC_NUCLEOTIDE_SECOND_MESSENGER             | 100  | 0.42270386 | 17.882.652 | 0.001438848 | 0.011034678 | 0.543      |
| CYTOKINE_AND_CHEMOKINE_MEDIATED_SIGNALING_PATHWAY                             | 22   | 0.57035005 | 17.753.948 | 0.010273972 | 0.012302167 | 0.592      |
| CALCIUM_MEDIATED_SIGNALING                                                    | 16   | 0.61996645 | 17.716.311 | 0.012658228 | 0.0127064   | 0.607      |
| CYCLIC_NUCLEOTIDE_MEDIATED_SIGNALING                                          | 102  | 0.41636667 | 17.554.556 | 0.002928257 | 0.014808057 | 0.664      |
| POSITIVE_REGULATION_OF_CELL_PROLIFERATION                                     | 149  | 0.3922275  | 1.747.775  | 0.0         | 0.015952801 | 0.698      |
| HOMEOSTATIC_PROCESS                                                           | 206  | 0.377045   | 17.458.205 | 0.0         | 0.016100932 | 0.703      |
| CELL_CELL_ADHESION                                                            | 86   | 0.4173379  | 17.370.979 | 0.001466275 | 0.017285122 | 0.738      |
| REGULATION_OF_SIGNAL_TRANSDUCTION                                             | 221  | 0.36412936 | 17.140.387 | 0.0         | 0.021289956 | 0.82       |
| INNATE_IMMUNE_RESPONSE                                                        | 23   | 0.54799205 | 16.893.071 | 0.016694492 | 0.026632505 | 0.888      |
| REGULATION_OF_CELL_ADHESION                                                   | 35   | 0.4793566  | 16.861.442 | 0.005145797 | 0.027056757 | 0.896      |
| SMALL_GTPASE_MEDIATED_SIGNAL_TRANSDUCTION                                     | 88   | 0.40673906 | 16.780.684 | 0.0         | 0.028481038 | 0.918      |
| LEUKOCYTE_MIGRATION                                                           | 16   | 0.5983012  | 16.789.377 | 0.017857144 | 0.028579043 | 0.915      |
| REGULATION_OF_BIOLOGICAL_QUALITY                                              | 416  | 0.33605337 | 16.762.364 | 0.0         | 0.028669242 | 0.926      |
| REGULATION_OF_CELL_PROLIFERATION                                              | 306  | 0.34659418 | 1.670.259  | 0.0         | 0.029873751 | 0.938      |
| CELL_MIGRATION                                                                | 96   | 0.3887779  | 16.564.822 | 0.0         | 0.033443835 | 0.956      |
| NEGATIVE_REGULATION_OF_SIGNAL_TRANSDUCTION                                    | 37   | 0.4727009  | 16.477.175 | 0.014469453 | 0.03556887  | 0.963      |
| G_PROTEIN_SIGNALING_COUPLED_TO_CAMP_NUCLEOTIDE_SECOND_MESSENGER               | 64   | 0.41933173 | 16.389.685 | 0.0030441   | 0.038088784 | 0.969      |
| REGULATION_OF_CYTOKINE_SECRETION                                              | 16   | 0.58829826 | 163.405    | 0.013961606 | 0.039356817 | 0.975      |
| G_PROTEIN_SIGNALING_COUPLED_TO_IP3_SECOND_MESSENGERPHOSPHOLIPASE_C_ACTIVATING | 45   | 0.44321364 | 1.628.245  | 0.012618297 | 0.040879335 | 0.978      |
| NEURON_DIFFERENTIATION                                                        | 76   | 0.40028793 | 16.217.014 | 0.004524887 | 0.04294803  | 0.982      |
| CAMP_MEDIATED_SIGNALING                                                       | 65   | 0.41522512 | 16.193.737 | 0.001457726 | 0.043339346 | 0.983      |
| PROTEIN_SECRETION                                                             | 32   | 0.47318235 | 16.162.884 | 0.017432647 | 0.04414901  | 0.985      |
| POSITIVE_REGULATION_OF_SIGNAL_TRANSDUCTION                                    | 125  | 0.37121367 | 16.115.342 | 0.001356852 | 0.045548096 | 0.986      |
| REGULATION_OF_T_CELL_PROLIFERATION                                            | 16   | 0.5608603  | 16.042.469 | 0.031088082 | 0.047812782 | 0.991      |
| COAGULATION                                                                   | 43   | 0.4452324  | 16.002.772 | 0.013888889 | 0.04870132  | 0.992      |

| GO Molecular Function NAME                                           | SIZE | ES         | NES        | NOM p-val    | FDR q-val   | FWER p-val |
|----------------------------------------------------------------------|------|------------|------------|--------------|-------------|------------|
| CYTOKINE_BINDING                                                     | 48   | 0.6331821  | 22.841.039 | 0.0          | 0.0         | 0.0        |
| CHEMOKINE_RECEPTOR_BINDING                                           | 43   | 0.62106246 | 22.627.044 | 0.0          | 0.0         | 0.0        |
| INTERLEUKIN_BINDING                                                  | 25   | 0.683845   | 2.202.532  | 0.0          | 0.0         | 0.0        |
| CHEMOKINE_ACTIVITY                                                   | 42   | 0.6084665  | 21.933.975 | 0.0          | 0.0         | 0.0        |
| G_PROTEIN_COUPLED_RECEPTOR_BINDING                                   | 54   | 0.5614492  | 21.100.106 | 0.0          | 6,73E+02    | 0.005      |
| EXTRACELLULAR_MATRIX_STRUCTURAL_CONSTITUENT                          | 27   | 0.65362287 | 2.143.306  | 0.0          | 4,65E+03    | 0.003      |
| HEMATOPOIETIN_INTERFERON_CLASSD200_DOMAIN_CYTOKINE_RECEPTOR_ACTIVITY | 33   | 0.6205426  | 21.452.909 | 0.0          | 5,57E+03    | 0.003      |
| PHOSPHORIC_DIESTER_HYDROLASE_ACTIVITY                                | 40   | 0.56964993 | 20.315.628 | 0.0          | 0.001047832 | 0.01       |
| INTERLEUKIN_RECEPTOR_ACTIVITY                                        | 20   | 0.67784286 | 20.464.528 | 0.0          | 0.001067342 | 0.009      |
| ANTIGEN_BINDING                                                      | 27   | 0.61023635 | 19.850.389 | 0.0          | 0.002226636 | 0.026      |
| TRANSMEMBRANE_RECEPTOR_ACTIVITY                                      | 416  | 0.4012774  | 19.976.193 | 0.0          | 0.002260675 | 0.024      |
| RHO_GTPASE_ACTIVATOR_ACTIVITY                                        | 19   | 0.6493542  | 19.471.574 | 0.0          | 0.004042364 | 0.048      |
| PHOSPHOLIPASE_C_ACTIVITY                                             | 15   | 0.66761976 | 18.661.746 | 0.0          | 0.010697284 | 0.137      |
| PROTEIN_TYROSINE_KINASE_ACTIVITY                                     | 63   | 0.47056752 | 18.475.307 | 0.0          | 0.012744042 | 0.171      |
| PHOSPHOLIPASE_ACTIVITY                                               | 42   | 0.50729364 | 18.362.352 | 0.0          | 0.013561005 | 0.189      |
| RECEPTOR_SIGNALING_PROTEIN_ACTIVITY                                  | 82   | 0.43047044 | 17.460.672 | 0.002994012  | 0.03433713  | 0.427      |
| CALMODULIN_BINDING                                                   | 25   | 0.541565   | 17.239.544 | 0.013266998  | 0.040058415 | 0.497      |
| RAS_GTPASE_ACTIVATOR_ACTIVITY                                        | 29   | 0.5266693  | 17.155.962 | 0.0034423408 | 0.040286925 | 0.516      |
| INTEGRIN_BINDING                                                     | 30   | 0.5102038  | 17.061.732 | 0.0065252855 | 0.041996773 | 0.549      |
| LIPID_BINDING                                                        | 87   | 0.4104348  | 16.802.553 | 0.0014705883 | 0.047515728 | 0.622      |
| CARBOHYDRATE_BINDING                                                 | 71   | 0.4218184  | 16.811.181 | 0.0015243903 | 0.04971318  | 0.621      |

| GO Cellular Component NAME         | SIZE | ES         | NES        | NOM p-val    | FDR q-val    | FWER p-val |
|------------------------------------|------|------------|------------|--------------|--------------|------------|
| EXTRACELLULAR_MATRIX               | 99   | 0.60991263 | 26.049.685 | 0.0          | 0.0          | 0.0        |
| PROTEINACEOUS_EXTRACELLULAR_MATRIX | 98   | 0.6120536  | 25.567.513 | 0.0          | 0.0          | 0.0        |
| EXTRACELLULAR_MATRIX_PART          | 57   | 0.5674156  | 2.189.806  | 0.0          | 0.0          | 0.0        |
| EXTRACELLULAR_REGION_PART          | 335  | 0.44603083 | 21.701.753 | 0.0          | 0.0          | 0.0        |
| LIPID_RAFT                         | 29   | 0.653096   | 21.603.768 | 0.0          | 0.0          | 0.0        |
| COLLAGEN                           | 23   | 0.682327   | 21.477.323 | 0.0          | 0.0          | 0.0        |
| EXTRACELLULAR_REGION               | 442  | 0.42336974 | 21.205.728 | 0.0          | 0.0          | 0.0        |
| RECEPTOR_COMPLEX                   | 54   | 0.5357445  | 20.056.446 | 0.0          | 3,29E+03     | 0.005      |
| EXTERNAL_SIDE_OF_PLASMA_MEMBRANE   | 16   | 0.6711314  | 19.241.213 | 0.0          | 0.0025958682 | 0.042      |
| CELL_SUBSTRATE_ADHERENS_JUNCTION   | 16   | 0.6496239  | 18.559.018 | 0.001776199  | 0.0063270414 | 0.108      |
| INTEGRIN_COMPLEX                   | 19   | 0.6167504  | 18.339.581 | 0.0036697248 | 0.00681179   | 0.137      |
| CELL_SURFACE                       | 78   | 0.45862836 | 18.414.276 | 0.0          | 0.006845611  | 0.127      |
| BASEMENT_MEMBRANE                  | 37   | 0.5143726  | 18.115.678 | 0.0015797789 | 0.008396592  | 0.18       |
| EXTRACELLULAR_SPACE                | 242  | 0.3780886  | 1.800.035  | 0.0          | 0.008646189  | 0.199      |
| CELL_MATRIX_JUNCTION               | 18   | 0.6064776  | 17.628.424 | 0.0068728523 | 0.011516997  | 0.276      |
| BASAL_LAMINA                       | 21   | 0.5803754  | 17.538.316 | 0.0051107327 | 0.011721258  | 0.296      |
| LYSOSOME                           | 61   | 0.4241982  | 16.789.434 | 0.0045045046 | 0.022236206  | 0.496      |
| LYTIC_VACUOLE                      | 61   | 0.4241982  | 1.646.706  | 0.009345794  | 0.028496666  | 0.602      |
| INSOLUBLE_FRACTION                 | 15   | 0.5764318  | 15.954.666 | 0.036842104  | 0.04042416   | 0.76       |

| miRNA NAME | SIZE | ES | NES | NOM p-val | FDR q-val | FWER p-val |
|------------|------|----|-----|-----------|-----------|------------|
|------------|------|----|-----|-----------|-----------|------------|

0 significant terms



| Transcription Factor NAME | SIZE | ES         | NES        | NOM p-val    | FDR q-val    | FWER p-val |
|---------------------------|------|------------|------------|--------------|--------------|------------|
| V\$COREBINDINGFACTOR_Q6   | 262  | 0.48850337 | 230.569    | 0.0          | 0.0          | 0.0        |
| V\$IRF_Q6                 | 234  | 0.4769561  | 22.442.153 | 0.0          | 0.0          | 0.0        |
| GGGNNTTCC_V\$NFKB_Q6_01   | 132  | 0.5063444  | 22.416.205 | 0.0          | 0.0          | 0.0        |
| V\$AML_Q6                 | 255  | 0.4606734  | 22.082.074 | 0.0          | 0.0          | 0.0        |
| RACCACAR_V\$AML_Q6        | 252  | 0.46126232 | 21.880.171 | 0.0          | 0.0          | 0.0        |
| V\$PU1_Q6                 | 223  | 0.43330595 | 20.114.594 | 0.0          | 2,50E+02     | 0.004      |
| V\$AML1_01                | 258  | 0.42228472 | 20.127.084 | 0.0          | 2,67E+02     | 0.004      |
| V\$IRF1_01                | 241  | 0.43089455 | 20.651.941 | 0.0          | 2,80E+02     | 0.002      |
| V\$ICSBP_Q6               | 239  | 0.3950631  | 18.552.918 | 0.0          | 7,70E+02     | 0.02       |
| V\$IRF7_01                | 242  | 0.41226885 | 19.669.973 | 0.0          | 2,10E+03     | 0.004      |
| V\$IRF2_01                | 121  | 0.45187533 | 19.686.435 | 0.0          | 2,22E+03     | 0.004      |
| V\$SRF_Q5_01              | 214  | 0.42506447 | 198.127    | 0.0          | 2,35E+03     | 0.004      |
| V\$ISRE_01                | 241  | 0.43427518 | 2.054.772  | 0.0          | 2,45E+03     | 0.002      |
| V\$STAT5B_01              | 237  | 0.40976092 | 19.420.007 | 0.0          | 2,50E+03     | 0.005      |
| V\$IRF1_Q6                | 244  | 0.40736574 | 19.374.042 | 0.0          | 2,85E+03     | 0.006      |
| RGAGGAARY_V\$PU1_Q6       | 485  | 0.40069374 | 20.171.177 | 0.0          | 2,86E+03     | 0.004      |
| V\$ELF1_Q6                | 232  | 0.43160143 | 20.192.966 | 0.0          | 3,08E+03     | 0.004      |
| STTCRNTTT_V\$IRF_Q6       | 181  | 0.46137062 | 2.105.103  | 0.0          | 3,27E+03     | 0.002      |
| V\$PEA3_Q6                | 250  | 0.42927888 | 20.459.585 | 0.0          | 3,32E+03     | 0.003      |
| CCAWWNAAGG_V\$SRF_Q4      | 87   | 0.48887655 | 2.026.946  | 0.0          | 3,33E+03     | 0.004      |
| V\$AML1_Q6                | 258  | 0.42228472 | 2.031.548  | 0.0          | 3,63E+03     | 0.004      |
| V\$ETS2_B                 | 268  | 0.42377424 | 20.354.815 | 0.0          | 4,00E+03     | 0.004      |
| V\$ETS_Q4                 | 244  | 0.40257472 | 18.943.301 | 0.0          | 4,08E+03     | 0.009      |
| V\$SRF_Q6                 | 238  | 0.40048125 | 18.933.803 | 0.0          | 4,33E+03     | 0.01       |
| V\$SRF_C                  | 209  | 0.40379184 | 18.773.036 | 0.0          | 4,80E+03     | 0.012      |
| V\$RP58_01                | 198  | 0.40750626 | 18.821.038 | 0.0          | 5,00E+03     | 0.012      |
| V\$SRF_01                 | 50   | 0.4943002  | 18.354.716 | 0.0016207459 | 0.001074138  | 0.03       |
| V\$STAT6_02               | 250  | 0.3854962  | 18.377.388 | 0.0          | 0.0010763664 | 0.029      |
| V\$ETS1_B                 | 245  | 0.38225293 | 18.271.482 | 0.0          | 0.001141784  | 0.033      |
| V\$NERF_Q2                | 241  | 0.3873262  | 18.244.433 | 0.0          | 0.001238236  | 0.037      |
| YNTTTNNNANGCARM_UNKNOWN   | 68   | 0.4616272  | 18.125.323 | 0.001488095  | 0.001361600  | 0.041      |
| V\$STAT4_01               | 254  | 0.37773255 | 17.969.328 | 0.0          | 0.001467966  | 0.05       |
| V\$POU6F1_01              | 230  | 0.3812876  | 18.012.224 | 0.0          | 0.001496632  | 0.048      |
| V\$NFAT_Q6                | 237  | 0.3831277  | 17.970.105 | 0.0          | 0.001511142  | 0.05       |
| V\$GATA1_04               | 237  | 0.38192433 | 18.015.342 | 0.0          | 0.001543402  | 0.048      |
| V\$STAT5A_01              | 241  | 0.3772046  | 17.859.259 | 0.0          | 0.001764526  | 0.061      |
| AAANWWTGC_UNKNOWN         | 189  | 0.3815109  | 17.762.077 | 0.0          | 0.001937653  | 0.069      |
| V\$FOXO3_01               | 192  | 0.37677848 | 17.589.036 | 0.0          | 0.002395692  | 0.087      |
| V\$MEF2_02                | 218  | 0.37846833 | 17.572.612 | 0.0          | 0.002436505  | 0.09       |
| V\$NFKB_Q6                | 252  | 0.36677605 | 17.508.775 | 0.0          | 0.002574766  | 0.097      |
| V\$PAX5_02                | 16   | 0.60831505 | 174.533    | 0.008417509  | 0.002610786  | 0.101      |
| V\$OCT1_05                | 244  | 0.36836475 | 17.397.289 | 0.0          | 0.002744796  | 0.109      |
| TTANWNANTGGM_UNKNOWN      | 58   | 0.4535573  | 17.373.544 | 0.0          | 0.002776879  | 0.112      |
| V\$NFKB_Q6_01             | 228  | 0.3686697  | 173.372    | 0.0          | 0.002830494  | 0.116      |
| V\$NFKAPPAB_01            | 247  | 0.36057448 | 17.191.975 | 0.0          | 0.003331067  | 0.138      |
| V\$GATA1_03               | 239  | 0.35877156 | 17.035.255 | 0.0          | 0.003603635  | 0.165      |
| V\$OCT1_04                | 225  | 0.36345565 | 17.006.227 | 0.0          | 0.003622480  | 0.173      |
| V\$PAX4_04                | 209  | 0.36475325 | 17.085.959 | 0.0          | 0.003632023  | 0.153      |
| V\$MEF2_03                | 230  | 0.36643317 | 17.058.127 | 0.0          | 0.003635386  | 0.163      |
| V\$E47_02                 | 240  | 0.3602911  | 170.161    | 0.0          | 0.003653719  | 0.171      |
| V\$AR_01                  | 148  | 0.38234442 | 17.065.939 | 0.002732240  | 0.003668576  | 0.161      |
| V\$CEBP_01                | 260  | 0.35995808 | 17.066.467 | 0.0          | 0.003725785  | 0.16       |
| CATTGTYT_V\$SOX9_B1       | 347  | 0.34580055 | 16.937.331 | 0.0          | 0.003863091  | 0.187      |
| V\$NKX61_01               | 227  | 0.36069572 | 16.901.692 | 0.0          | 0.003870117  | 0.195      |
| V\$NKX62_Q2               | 235  | 0.35737434 | 16.924.862 | 0.0          | 0.003904449  | 0.193      |
| V\$LMO2COM_02             | 236  | 0.3542479  | 1.693.913  | 0.0          | 0.003935979  | 0.187      |
| V\$CDC5_01                | 239  | 0.3569457  | 16.848.186 | 0.001280409  | 0.003944522  | 0.21       |
| V\$GATA_Q6                | 191  | 0.36370614 | 16.867.437 | 0.0          | 0.003960686  | 0.207      |

|                        |     |            |            |              |             |       |
|------------------------|-----|------------|------------|--------------|-------------|-------|
| AAAYWAACM_V\$HFH4_01   | 244 | 0.35434332 | 16.877.363 | 0.0          | 0.003977453 | 0.204 |
| V\$OCT1_B              | 256 | 0.35216755 | 16.806.433 | 0.0          | 0.0040637   | 0.22  |
| V\$PAX_Q6              | 245 | 0.35130575 | 16.730.616 | 0.0012468828 | 0.004477720 | 0.241 |
| V\$TATA_C              | 276 | 0.34642512 | 16.692.663 | 0.0          | 0.004512477 | 0.251 |
| YTAATTA_V\$LHX3_01     | 180 | 0.36541253 | 16.707.512 | 0.0          | 0.004519758 | 0.247 |
| GATAAGR_V\$GATA_C      | 284 | 0.34525746 | 1.663.709  | 0.0          | 0.004551074 | 0.264 |
| V\$FREAC4_01           | 145 | 0.3737893  | 16.672.404 | 0.0          | 0.004583921 | 0.257 |
| V\$OSF2_Q6             | 252 | 0.3517182  | 16.639.223 | 0.0          | 0.004621091 | 0.264 |
| V\$NFKAPPAB65_01       | 231 | 0.35412675 | 16.591.272 | 0.001280409  | 0.004800717 | 0.281 |
| V\$SRF_Q4              | 218 | 0.35117003 | 16.534.657 | 0.0012953368 | 0.0049574   | 0.302 |
| V\$FOXO4_02            | 248 | 0.35004145 | 16.541.332 | 0.0          | 0.004984779 | 0.299 |
| V\$NFAT_Q4_01          | 259 | 0.34656936 | 16.562.954 | 0.0          | 0.00499694  | 0.293 |
| V\$GFI1_01             | 257 | 0.35029227 | 16.547.412 | 0.0          | 0.005027764 | 0.298 |
| WWTAAGGC_UNKNOWN       | 138 | 0.3675782  | 16.411.972 | 0.0          | 0.005842052 | 0.346 |
| V\$HMEF2_Q6            | 133 | 0.37044823 | 16.381.397 | 0.0          | 0.005956594 | 0.354 |
| V\$MAF_Q6              | 249 | 0.34600997 | 16.345.627 | 0.0          | 0.006095601 | 0.363 |
| YKACATTT_UNKNOWN       | 270 | 0.33732066 | 1.626.892  | 0.0          | 0.006635433 | 0.389 |
| V\$MEF2_01             | 138 | 0.36592227 | 16.215.928 | 0.001367989  | 0.007014514 | 0.411 |
| V\$S8_01               | 240 | 0.33933654 | 16.156.965 | 0.0          | 0.007502510 | 0.435 |
| V\$CEBPB_01            | 251 | 0.34043127 | 16.120.723 | 0.0          | 0.007746899 | 0.45  |
| V\$STAT5A_03           | 250 | 0.34028077 | 16.109.282 | 0.0          | 0.007751229 | 0.454 |
| V\$RSRFC4_01           | 234 | 0.3422124  | 16.083.604 | 0.0          | 0.007857302 | 0.465 |
| YTAAYNGCT_UNKNOWN      | 146 | 0.360145   | 16.054.528 | 0.0          | 0.007946419 | 0.472 |
| V\$IK2_01              | 264 | 0.33252898 | 1.603.715  | 0.0          | 0.00803346  | 0.478 |
| V\$CREL_01             | 251 | 0.33516204 | 16.027.013 | 0.0          | 0.008081673 | 0.483 |
| V\$CEBP_Q2             | 222 | 0.33788043 | 15.988.058 | 0.0          | 0.008306633 | 0.505 |
| V\$NFKB_C              | 260 | 0.3366832  | 1.599.098  | 0.0          | 0.008367828 | 0.502 |
| V\$LHX3_01             | 218 | 0.33865768 | 15.998.063 | 0.0          | 0.008371131 | 0.497 |
| V\$TAL1BETAITF2_01     | 245 | 0.33755043 | 15.912.497 | 0.002544529  | 0.008911191 | 0.528 |
| V\$OCT1_02             | 206 | 0.34167835 | 15.841.428 | 0.0          | 0.009438982 | 0.559 |
| V\$HP1SITEFACTOR_Q6    | 223 | 0.33425543 | 1.584.967  | 0.0          | 0.009477776 | 0.557 |
| V\$OCT_C               | 252 | 0.33330435 | 15.818.632 | 0.0          | 0.009545857 | 0.564 |
| V\$SOX9_B1             | 227 | 0.33440655 | 158.082    | 0.001303780  | 0.009585912 | 0.572 |
| TGATTRY_V\$GFI1_01     | 284 | 0.327154   | 15.778.502 | 0.0          | 0.009737893 | 0.587 |
| RAAGNYNCTTY_UNKNOWN    | 142 | 0.35579735 | 15.784.527 | 0.004316547  | 0.009777869 | 0.584 |
| V\$TCF11_01            | 245 | 0.33508983 | 15.759.493 | 0.0          | 0.009836049 | 0.597 |
| V\$FAC1_01             | 215 | 0.33563027 | 15.726.719 | 0.0          | 0.010122795 | 0.612 |
| V\$CIZ_01              | 229 | 0.33484593 | 15.631.437 | 0.0          | 0.011014787 | 0.641 |
| V\$GATA6_01            | 257 | 0.3276845  | 15.631.615 | 0.0          | 0.011129524 | 0.641 |
| V\$GATA1_05            | 273 | 0.3264761  | 15.584.705 | 0.0          | 0.011281988 | 0.663 |
| V\$GATA1_02            | 235 | 0.33010048 | 15.596.566 | 0.001248439  | 0.011304299 | 0.656 |
| GTGGGTGK_UNKNOWN       | 279 | 0.32425913 | 15.587.524 | 0.0          | 0.011374663 | 0.663 |
| V\$PITX2_Q2            | 240 | 0.32921234 | 15.564.591 | 0.0          | 0.011499333 | 0.669 |
| YNGTTNNNATT_UNKNOWN    | 357 | 0.31749263 | 15.526.216 | 0.001194743  | 0.011638857 | 0.691 |
| V\$SRY_02              | 243 | 0.32790488 | 15.530.952 | 0.001273885  | 0.011654389 | 0.688 |
| V\$ELK1_01             | 261 | 0.32475325 | 15.534.827 | 0.0          | 0.011668082 | 0.686 |
| V\$EVI1_06             | 20  | 0.51822585 | 15.542.003 | 0.03208556   | 0.011674036 | 0.682 |
| V\$NCX_01              | 161 | 0.34690702 | 15.493.746 | 0.0027472528 | 0.012044145 | 0.708 |
| V\$PBX1_01             | 244 | 0.329364   | 15.449.549 | 0.001273885  | 0.01230486  | 0.726 |
| V\$FOXJ2_02            | 227 | 0.32764244 | 1.545.634  | 0.003778337  | 0.012354021 | 0.723 |
| V\$LBP1_Q6             | 210 | 0.33235344 | 15.413.846 | 0.001298701  | 0.012712247 | 0.741 |
| V\$OCT1_Q5_01          | 260 | 0.3235466  | 15.401.173 | 0.001285347  | 0.012825283 | 0.745 |
| V\$EN1_01              | 107 | 0.3578884  | 15.337.445 | 0.008695652  | 0.012960961 | 0.771 |
| V\$MSX1_01             | 172 | 0.3361376  | 15.368.105 | 0.001329787  | 0.013028108 | 0.757 |
| V\$PAX2_02             | 248 | 0.32215244 | 15.338.638 | 0.002541296  | 0.013073665 | 0.771 |
| V\$TFIIA_Q6            | 247 | 0.3221493  | 15.320.948 | 0.0          | 0.01310244  | 0.776 |
| V\$E47_01              | 243 | 0.32676    | 15.342.371 | 0.0          | 0.013125936 | 0.769 |
| YATTNATC_UNKNOWN       | 362 | 0.31513977 | 15.369.796 | 0.0          | 0.013127625 | 0.757 |
| TTCYNRGAA_V\$STAT5B_01 | 323 | 0.31713858 | 15.350.481 | 0.0          | 0.013180877 | 0.769 |

|                         |     |            |            |              |             |       |
|-------------------------|-----|------------|------------|--------------|-------------|-------|
| V\$RSRFC4_Q2            | 206 | 0.32833123 | 15.298.693 | 0.0013333333 | 0.013189072 | 0.785 |
| V\$MEF2_Q6_01           | 234 | 0.32244048 | 15.307.266 | 0.0025510204 | 0.013196876 | 0.782 |
| TGTYNNNNNRGCARM_UNKNOWN | 83  | 0.3765325  | 15.289.018 | 0.00729927   | 0.013264856 | 0.789 |
| V\$CEBP_Q2_01           | 261 | 0.31818572 | 15.266.296 | 0.001285347  | 0.013404865 | 0.797 |
| V\$PAX8_01              | 36  | 0.43506065 | 15.252.254 | 0.019417476  | 0.013466294 | 0.805 |
| V\$OCT1_Q6              | 254 | 0.32098246 | 152.553    | 0.001261034  | 0.013485953 | 0.802 |
| V\$OCT1_03              | 220 | 0.3252212  | 1.526.935  | 0.0012406948 | 0.013491073 | 0.796 |
| V\$STAT5A_04            | 204 | 0.3307845  | 15.205.677 | 0.0039473684 | 0.01420596  | 0.825 |
| V\$EVI1_02              | 127 | 0.34931022 | 15.198.393 | 0.006887052  | 0.014295264 | 0.829 |
| V\$NKX25_02             | 256 | 0.31705487 | 15.076.215 | 0.0          | 0.016280472 | 0.862 |
| V\$OCT_Q6               | 252 | 0.31775954 | 15.052.627 | 0.003811944  | 0.016722074 | 0.87  |
| V\$CHX10_01             | 217 | 0.3222275  | 15.043.243 | 0.0012642225 | 0.016820304 | 0.874 |
| V\$CEBPDELTA_Q6         | 233 | 0.31783402 | 1.502.136  | 0.001261034  | 0.016980415 | 0.875 |
| V\$PR_01                | 145 | 0.34042045 | 15.024.625 | 0.0054945056 | 0.017048607 | 0.875 |
| V\$CRX_Q4               | 261 | 0.3109846  | 14.995.998 | 0.0024213076 | 0.017211976 | 0.88  |
| V\$GATA3_01             | 233 | 0.31785774 | 15.001.531 | 0.008053691  | 0.017279934 | 0.88  |
| V\$HMGY_Q6              | 241 | 0.31466615 | 14.968.712 | 0.0012886598 | 0.017516391 | 0.893 |
| V\$POU3F2_02            | 253 | 0.3153112  | 14.972.692 | 0.0          | 0.017549725 | 0.891 |
| CCCNNGGGAR_V\$OLF1_01   | 309 | 0.3058142  | 14.888.239 | 0.0          | 0.019080954 | 0.915 |
| V\$HAND1E47_01          | 260 | 0.31153378 | 14.788.036 | 0.001216545  | 0.021313203 | 0.936 |
| CTGYNNCTYTAA_UNKNOWN    | 81  | 0.36052763 | 14.776.874 | 0.018376723  | 0.021473812 | 0.939 |
| V\$ARP1_01              | 153 | 0.32839948 | 14.743.941 | 0.0053619305 | 0.021987848 | 0.945 |
| V\$CDX2_Q5              | 242 | 0.30948654 | 14.747.376 | 0.002541296  | 0.022058964 | 0.945 |
| V\$GR_01                | 197 | 0.31544572 | 14.714.813 | 0.0012936611 | 0.022062996 | 0.947 |
| V\$LFA1_Q6              | 234 | 0.31180397 | 1.471.044  | 0.008985879  | 0.022065133 | 0.95  |
| V\$HNF3_Q6              | 184 | 0.32062897 | 14.716.935 | 0.003984064  | 0.022167949 | 0.947 |
| V\$AREB6_04             | 243 | 0.30810732 | 14.717.249 | 0.001285347  | 0.022317111 | 0.947 |
| V\$HOXA4_Q2             | 258 | 0.30716243 | 14.717.886 | 0.006203474  | 0.022454122 | 0.947 |
| V\$HFH1_01              | 235 | 0.30953655 | 14.667.747 | 0.0012755102 | 0.022900606 | 0.956 |
| V\$AR_02                | 38  | 0.4146533  | 14.570.969 | 0.0521327    | 0.025599891 | 0.971 |
| GTRYCATRR_UNKNOWN       | 160 | 0.32129985 | 14.564.313 | 0.01076716   | 0.02568053  | 0.974 |
| RTTNNNYTGGM_UNKNOWN     | 148 | 0.32854775 | 14.557.806 | 0.0069060773 | 0.02571287  | 0.974 |
| YATGNWAAT_V\$OCT_C      | 348 | 0.29602835 | 14.468.756 | 0.004761905  | 0.027442675 | 0.984 |
| V\$MYB_Q6               | 245 | 0.30483508 | 14.470.034 | 0.005063291  | 0.027588893 | 0.984 |
| V\$EVI1_05              | 165 | 0.32140112 | 1.447.187  | 0.0094086025 | 0.027724521 | 0.984 |
| V\$TEF_Q6               | 245 | 0.30533335 | 1.447.447  | 0.00622665   | 0.027820831 | 0.984 |
| V\$TAL1BETAE47_01       | 239 | 0.3090433  | 14.475.251 | 0.0037546933 | 0.027986642 | 0.984 |
| V\$CEBP_Q3              | 245 | 0.30443236 | 14.416.555 | 0.006265664  | 0.028918272 | 0.989 |
| V\$AMEF2_Q6             | 247 | 0.3030337  | 14.362.023 | 0.0037974683 | 0.030524353 | 0.992 |
| V\$AP4_Q6               | 217 | 0.30613825 | 14.365.815 | 0.00498132   | 0.030577144 | 0.992 |
| RGAANN TTC_V\$HSF1_01   | 427 | 0.28765267 | 14.349.712 | 0.0022727272 | 0.030709734 | 0.992 |
| V\$AP1_Q6_01            | 257 | 0.29951185 | 14.332.192 | 0.0025510204 | 0.031181816 | 0.993 |
| V\$TEL2_Q6              | 228 | 0.30429047 | 14.313.083 | 0.0025608195 | 0.03175072  | 0.993 |
| V\$FREAC7_01            | 185 | 0.3130104  | 14.295.421 | 0.010403121  | 0.03218856  | 0.993 |
| V\$SREBP1_02            | 86  | 0.3438137  | 14.252.584 | 0.026239067  | 0.033645112 | 0.993 |
| V\$HNF3ALPHA_Q6         | 199 | 0.30345637 | 14.205.829 | 0.005154639  | 0.03525981  | 0.994 |
| V\$CP2_01               | 254 | 0.29752567 | 14.175.178 | 0.0037641155 | 0.03633073  | 0.996 |
| V\$HNF3B_01             | 210 | 0.30072752 | 14.161.615 | 0.007915568  | 0.036696926 | 0.997 |
| V\$FOXO4_01             | 228 | 0.29569986 | 14.111.674 | 0.009114583  | 0.03826942  | 0.998 |
| V\$CEBPB_02             | 246 | 0.29865044 | 14.112.448 | 0.008706467  | 0.038469244 | 0.998 |
| V\$IK3_01               | 218 | 0.30013955 | 14.092.258 | 0.009102731  | 0.038846064 | 0.999 |
| V\$FOX_Q2               | 206 | 0.30259466 | 14.066.373 | 0.0104302475 | 0.03963326  | 0.999 |
| CTAWWWATA_V\$RSRFC4_Q2  | 348 | 0.28586072 | 14.066.448 | 0.0          | 0.039867774 | 0.999 |
| V\$CEBPGAMMA_Q6         | 245 | 0.29652533 | 14.045.807 | 0.00795756   | 0.04035338  | 0.999 |
| V\$PTF1BETA_Q6          | 230 | 0.2974706  | 14.031.034 | 0.005319149  | 0.040388532 | 0.999 |
| V\$OCT1_07              | 154 | 0.31147477 | 14.034.898 | 0.013888889  | 0.04040673  | 0.999 |
| TGGNNNNNNKCCAR_UNKNOWN  | 402 | 0.2837754  | 14.038.454 | 0.001183432  | 0.04050541  | 0.999 |
| CAGNWMCNNGAC_UNKNOWN    | 79  | 0.34779036 | 14.004.929 | 0.034833092  | 0.04090436  | 0.999 |
| V\$HEN1_02              | 189 | 0.30315733 | 1.400.587  | 0.017615177  | 0.041075215 | 0.999 |

|                          |     |            |            |              |             |       |
|--------------------------|-----|------------|------------|--------------|-------------|-------|
| V\$AP4_Q5                | 258 | 0.2969809  | 13.988.718 | 0.007623888  | 0.04109306  | 0.999 |
| V\$ALX4_01               | 16  | 0.4855166  | 13.971.324 | 0.10928962   | 0.041205708 | 0.999 |
| V\$TAL1ALPHAE47_01       | 240 | 0.2955443  | 13.988.926 | 0.009043927  | 0.04131952  | 0.999 |
| V\$GR_Q6                 | 261 | 0.29160905 | 13.972.746 | 0.011392405  | 0.041361358 | 0.999 |
| V\$SREBP_Q3              | 249 | 0.2926546  | 1.397.339  | 0.0063211126 | 0.04157568  | 0.999 |
| V\$SMAD_Q6               | 241 | 0.29543325 | 1.395.749  | 0.00754717   | 0.041653752 | 0.999 |
| V\$PAX6_01               | 96  | 0.3330057  | 13.934.876 | 0.030837005  | 0.042264625 | 0.999 |
| V\$OCT1_01               | 254 | 0.28964105 | 13.935.357 | 0.008883249  | 0.04248452  | 0.999 |
| V\$FOXJ2_01              | 178 | 0.30360642 | 13.913.486 | 0.0066313    | 0.043041687 | 0.999 |
| V\$CHOP_01               | 228 | 0.2940522  | 13.886.095 | 0.0116731515 | 0.044096623 | 0.999 |
| RNTCANNRNNYNATTW_UNKNOWN | 62  | 0.35935032 | 13.879.952 | 0.05801527   | 0.04414453  | 0.999 |
| V\$PR_Q2                 | 254 | 0.29147303 | 1.380.971  | 0.0038860103 | 0.047463857 | 0.999 |
| V\$AP2REP_01             | 173 | 0.3027737  | 1.378.268  | 0.026595745  | 0.0484736   | 0.999 |
| V\$SMAD3_Q6              | 229 | 0.29173198 | 13.758.948 | 0.012903226  | 0.04950897  | 1.0   |

| Oncogenic Signature NAME           | SIZE | ES         | NES        | NOM p-val    | FDR q-val    | FWER p-val |
|------------------------------------|------|------------|------------|--------------|--------------|------------|
| RPS14_DN.V1_UP                     | 188  | 0.6244226  | 28.577.313 | 0.0          | 0.0          | 0.0        |
| P53_DN.V1_DN                       | 189  | 0.5746401  | 26.792.438 | 0.0          | 0.0          | 0.0        |
| CAHOY_ASTROGLIAL                   | 98   | 0.5571839  | 23.306.417 | 0.0          | 0.0          | 0.0        |
| LEF1_UP.V1_UP                      | 191  | 0.49340647 | 2.276.399  | 0.0          | 0.0          | 0.0        |
| CSR_LATE_UP.V1_DN                  | 159  | 0.50003725 | 22.705.717 | 0.0          | 0.0          | 0.0        |
| STK33_SKM_UP                       | 269  | 0.46551394 | 22.278.657 | 0.0          | 0.0          | 0.0        |
| SNF5_DN.V1_UP                      | 170  | 0.47837073 | 22.088.706 | 0.0          | 0.0          | 0.0        |
| HOXA9_DN.V1_UP                     | 189  | 0.47336954 | 21.988.037 | 0.0          | 0.0          | 0.0        |
| VEGF_A_UP.V1_UP                    | 189  | 0.4731134  | 21.808.286 | 0.0          | 0.0          | 0.0        |
| KRAS.KIDNEY_UP.V1_UP               | 142  | 0.47984126 | 21.408.238 | 0.0          | 0.0          | 0.0        |
| PTEN_DN.V1_UP                      | 182  | 0.4699401  | 21.404.803 | 0.0          | 0.0          | 0.0        |
| STK33_NOMO_UP                      | 276  | 0.44791278 | 21.402.876 | 0.0          | 0.0          | 0.0        |
| BRCA1_DN.V1_UP                     | 129  | 0.4834513  | 21.200.721 | 0.0          | 0.0          | 0.0        |
| IL2_UP.V1_DN                       | 187  | 0.45594642 | 21.033.483 | 0.0          | 0.0          | 0.0        |
| STK33_UP                           | 275  | 0.43852395 | 2.094.354  | 0.0          | 0.0          | 0.0        |
| PTEN_DN.V2_UP                      | 136  | 0.46707594 | 20.672.445 | 0.0          | 0.0          | 0.0        |
| JNK_DN.V1_UP                       | 182  | 0.4422201  | 20.214.975 | 0.0          | 0.0          | 0.0        |
| TGFB_UP.V1_UP                      | 182  | 0.39783335 | 1.824.934  | 0.0          | 5,12E+01     | 0.015      |
| CYCLIN_D1_KE_V1_DN                 | 189  | 0.42602375 | 19.591.274 | 0.0          | 1,78E+02     | 0.003      |
| KRAS.PROSTATE_UP.V1_UP             | 132  | 0.4217848  | 1.849.612  | 0.0          | 3,77E+02     | 0.01       |
| MEL18_DN.V1_UP                     | 139  | 0.42237368 | 18.588.673 | 0.0          | 4,03E+02     | 0.01       |
| BMI1_DN.V1_UP                      | 144  | 0.4167647  | 18.475.833 | 0.0          | 4,33E+02     | 0.012      |
| MEL18_DN.V1_DN                     | 144  | 0.40849307 | 18.275.557 | 0.0          | 5,27E+02     | 0.015      |
| KRAS.600.LUNG.BREAST_UP.V1_DN      | 276  | 0.38043714 | 18.159.188 | 0.0          | 5,64E+02     | 0.016      |
| BMI1_DN_MEL18_DN.V1_UP             | 142  | 0.40743244 | 17.990.454 | 0.0          | 6,36E+02     | 0.02       |
| IL21_UP.V1_UP                      | 181  | 0.39309645 | 18.078.092 | 0.0          | 6,40E+02     | 0.019      |
| EGFR_UP.V1_UP                      | 188  | 0.38757756 | 17.893.206 | 0.0          | 6,63E+02     | 0.022      |
| ATF2_UP.V1_DN                      | 182  | 0.43151346 | 19.710.097 | 0.0          | 1,30E+03     | 0.002      |
| ATF2_S_UP.V1_DN                    | 179  | 0.42511615 | 19.618.685 | 0.0          | 1,88E+03     | 0.003      |
| JNK_DN.V1_DN                       | 180  | 0.41955614 | 19.286.509 | 0.0          | 1,94E+03     | 0.004      |
| P53_DN.V2_UP                       | 147  | 0.4352445  | 19.350.691 | 0.0          | 2,02E+03     | 0.004      |
| KRAS.LUNG_UP.V1_UP                 | 136  | 0.43855676 | 19.375.767 | 0.0          | 2,11E+03     | 0.004      |
| AKT_UP.V1_DN                       | 182  | 0.42082828 | 19.380.515 | 0.0          | 2,21E+03     | 0.004      |
| CORDENONSI_YAP_CONSERVED_SIGNATURE | 57   | 0.48766166 | 18.740.348 | 0.0          | 3,60E+03     | 0.008      |
| KRAS.600.LUNG.BREAST_UP.V1_UP      | 277  | 0.3913937  | 18.770.742 | 0.0          | 3,74E+03     | 0.008      |
| KRAS.600_UP.V1_UP                  | 272  | 0.38764903 | 18.623.291 | 0.0          | 3,77E+03     | 0.009      |
| MYC_UP.V1_DN                       | 155  | 0.4120133  | 18.500.696 | 0.0          | 3,89E+03     | 0.01       |
| HINATA_NFKB_IMMUN_INF              | 17   | 0.6503985  | 18.681.815 | 0.0          | 3,91E+03     | 0.009      |
| E2F1_UP.V1_DN                      | 183  | 0.39701557 | 18.036.417 | 0.0          | 6,53E+03     | 0.02       |
| IL15_UP.V1_DN                      | 177  | 0.3918064  | 17.953.295 | 0.0          | 6,80E+03     | 0.022      |
| KRAS.300_UP.V1_UP                  | 139  | 0.39975536 | 17.670.695 | 0.0          | 7,87E+03     | 0.027      |
| ESC_V6.5_UP_EARLY.V1_DN            | 170  | 0.38698152 | 17.504.812 | 0.0          | 0.0010204508 | 0.036      |
| KRAS.LUNG.BREAST_UP.V1_UP          | 139  | 0.39045715 | 17.413.665 | 0.0          | 0.0011520191 | 0.041      |
| CAMP_UP.V1_DN                      | 194  | 0.3694115  | 17.303.969 | 0.0          | 0.0012978093 | 0.05       |
| BMI1_DN_MEL18_DN.V1_DN             | 141  | 0.38886586 | 17.305.303 | 0.0013661202 | 0.0013266496 | 0.05       |
| PTEN_DN.V1_DN                      | 174  | 0.3788313  | 1.731.242  | 0.0          | 0.0013568007 | 0.05       |
| WNT_UP.V1_DN                       | 167  | 0.376704   | 17.081.398 | 0.0          | 0.0014631253 | 0.057      |
| KRAS.BREAST_UP.V1_UP               | 136  | 0.37676817 | 16.821.352 | 0.0          | 0.002139388  | 0.088      |
| KRAS.KIDNEY_UP.V1_DN               | 133  | 0.3832057  | 16.828.027 | 0.0          | 0.0021607776 | 0.087      |
| RELA_DN.V1_DN                      | 133  | 0.38481006 | 16.727.258 | 0.0014104373 | 0.002390641  | 0.101      |
| CTIP_DN.V1_UP                      | 130  | 0.3830959  | 16.684.502 | 0.0          | 0.0024552722 | 0.105      |
| KRAS.50_UP.V1_UP                   | 47   | 0.45453492 | 16.640.067 | 0.006451613  | 0.0025397083 | 0.11       |
| CAHOY_NEURONAL                     | 96   | 0.39061064 | 16.443.694 | 0.0014409221 | 0.003599617  | 0.156      |
| KRAS.BREAST_UP.V1_DN               | 138  | 0.371436   | 16.382.909 | 0.0          | 0.003700296  | 0.161      |
| IL2_UP.V1_UP                       | 182  | 0.35743392 | 16.334.194 | 0.0025806453 | 0.003921433  | 0.173      |
| ALK_DN.V1_UP                       | 137  | 0.36897683 | 16.278.025 | 0.0027777778 | 0.004158387  | 0.186      |
| PKCA_DN.V1_DN                      | 162  | 0.35885426 | 16.231.617 | 0.0013333333 | 0.0041930987 | 0.194      |
| KRAS.600_UP.V1_DN                  | 274  | 0.33621523 | 16.232.604 | 0.0          | 0.004266662  | 0.194      |
| RAF_UP.V1_UP                       | 191  | 0.35265896 | 16.207.664 | 0.0013531799 | 0.004279013  | 0.2        |
| KRAS.AMP.LUNG_UP.V1_UP             | 132  | 0.36812115 | 1.615.216  | 0.0          | 0.004611169  | 0.219      |
| IL15_UP.V1_UP                      | 181  | 0.35397673 | 16.135.879 | 0.0          | 0.004611697  | 0.222      |
| MTOR_UP.N4.V1_DN                   | 174  | 0.35662848 | 16.038.215 | 0.0013315575 | 0.005169574  | 0.251      |

|                           |     |            |            |             |             |       |
|---------------------------|-----|------------|------------|-------------|-------------|-------|
| NRL_DN.V1_DN              | 129 | 0.3663135  | 15.970.125 | 0.001369863 | 0.005508545 | 0.267 |
| JAK2_DN.V1_UP             | 178 | 0.34450835 | 15.770.127 | 0.002713704 | 0.007180953 | 0.331 |
| NOTCH_DN.V1_DN            | 179 | 0.34495336 | 15.719.821 | 0.001280409 | 0.007441637 | 0.345 |
| NOTCH_DN.V1_UP            | 180 | 0.340849   | 15.583.539 | 0.0         | 0.008769618 | 0.393 |
| KRAS.PROSTATE_UP.V1_DN    | 138 | 0.3553995  | 15.565.917 | 0.001385041 | 0.008777835 | 0.398 |
| ATM_DN.V1_DN              | 146 | 0.34508628 | 15.378.934 | 0.001392757 | 0.010851515 | 0.473 |
| PDGF_UP.V1_DN             | 127 | 0.35007742 | 15.308.726 | 0.003937008 | 0.011854242 | 0.504 |
| RAPA_EARLY_UP.V1_UP       | 174 | 0.3337242  | 15.209.383 | 0.004043126 | 0.012860721 | 0.54  |
| KRAS.DF.V1_UP             | 191 | 0.32879487 | 1.521.207  | 0.002614379 | 0.012977209 | 0.537 |
| GCNP_SHH_UP_EARLY.V1_DN   | 165 | 0.3275416  | 15.026.357 | 0.004037685 | 0.015825126 | 0.618 |
| CRX_DN.V1_UP              | 134 | 0.336731   | 14.898.912 | 0.001416430 | 0.01831907  | 0.676 |
| PRC2_EDD_UP.V1_DN         | 186 | 0.32241443 | 14.781.423 | 0.002574002 | 0.020492993 | 0.719 |
| KRAS.300_UP.V1_DN         | 136 | 0.3327831  | 146.581    | 0.01345895  | 0.022929762 | 0.763 |
| PRC2_SUZ12_UP.V1_DN       | 177 | 0.32145515 | 14.636.998 | 0.008253095 | 0.022957155 | 0.77  |
| LTE2_UP.V1_DN             | 192 | 0.31515417 | 1.454.994  | 0.007741935 | 0.0251734   | 0.804 |
| IL21_UP.V1_DN             | 176 | 0.31419784 | 14.442.749 | 0.013404826 | 0.028087826 | 0.852 |
| CSR_EARLY_UP.V1_DN        | 135 | 0.32733256 | 14.395.486 | 0.023448275 | 0.029257586 | 0.867 |
| P53_DN.V2_DN              | 144 | 0.31840214 | 14.275.559 | 0.02642559  | 0.03242916  | 0.903 |
| SNF5_DN.V1_DN             | 158 | 0.31684825 | 14.258.301 | 0.016574586 | 0.03247352  | 0.91  |
| KRAS.AMP.LUNG_UP.V1_DN    | 137 | 0.3203887  | 14.201.272 | 0.027173912 | 0.033893026 | 0.917 |
| ALK_DN.V1_DN              | 136 | 0.31542206 | 14.036.307 | 0.023188407 | 0.039127663 | 0.948 |
| TGFB_UP.V1_DN             | 186 | 0.30372775 | 1.404.578  | 0.012048192 | 0.03927089  | 0.947 |
| PIGF_UP.V1_DN             | 188 | 0.30542582 | 13.979.436 | 0.015810277 | 0.040915024 | 0.955 |
| RELA_DN.V1_UP             | 147 | 0.31047836 | 1.392.786  | 0.022315202 | 0.042754423 | 0.963 |
| MEK_UP.V1_DN              | 189 | 0.30033076 | 13.905.263 | 0.018087855 | 0.043225154 | 0.963 |
| KRAS.LUNG.BREAST_UP.V1_DN | 138 | 0.31364024 | 13.874.161 | 0.017639078 | 0.04356143  | 0.969 |
| MTOR_UP.V1_DN             | 181 | 0.30009377 | 1.388.298  | 0.026845638 | 0.043644115 | 0.967 |
| AKT_UP_MTOR_DN.V1_DN      | 178 | 0.30087206 | 13.861.936 | 0.025920874 | 0.04365036  | 0.972 |
| ATF2_S_UP.V1_UP           | 185 | 0.2976641  | 13.849.981 | 0.012295082 | 0.04368766  | 0.972 |
| DCA_UP.V1_UP              | 178 | 0.30129763 | 1.372.371  | 0.017639078 | 0.048088655 | 0.983 |
| ATM_DN.V1_UP              | 144 | 0.31144783 | 13.725.749 | 0.029745042 | 0.04857589  | 0.983 |

| Immunological Signature NAME                                                           | SIZE | ES         | NES        | NOM p-val | FDR q-val | FWER p-val |
|----------------------------------------------------------------------------------------|------|------------|------------|-----------|-----------|------------|
| GSE7218_UNSTIM_VS_ANTIGEN_STIM_THROUGH_IGG_BCELL_DN                                    | 164  | 0.7147537  | 32.440.228 | 0.0       | 0.0       | 0.0        |
| GSE7509_UNSTIM_VS_IFNA_STIM_IMMATURE_DC_DN                                             | 168  | 0.6737467  | 30.798.836 | 0.0       | 0.0       | 0.0        |
| GSE10325_CD4_TCELL_VS_BCELL_DN                                                         | 186  | 0.63913745 | 29.670.217 | 0.0       | 0.0       | 0.0        |
| GSE11057_PBMC_VS_MEM_CD4_TCELL_UP                                                      | 192  | 0.6381964  | 2.943.033  | 0.0       | 0.0       | 0.0        |
| GSE10325_LUPUS_CD4_TCELL_VS_LUPUS_BCELL_DN                                             | 188  | 0.6408385  | 29.402.115 | 0.0       | 0.0       | 0.0        |
| GSE19888_ADENOSINE_A3R_INH_PRETREAT_AND_ACT_BY_A3R_VS_TCELL_MEMBRANES_ACT_MAST_CELL_UP | 194  | 0.6310631  | 2.923.597  | 0.0       | 0.0       | 0.0        |
| GSE19888_ADENOSINE_A3R_ACT_VS_TCELL_MEMBRANES_ACT_IN_MAST_CELL_UP                      | 195  | 0.62647367 | 28.901.632 | 0.0       | 0.0       | 0.0        |
| GSE10325_LUPUS_CD4_TCELL_VS_LUPUS_MYELOID_DN                                           | 198  | 0.6216003  | 2.884.046  | 0.0       | 0.0       | 0.0        |
| GSE1460_INTRATHYMIC_T_PROGENITOR_VS_CD4_THYMOCYTE_DN                                   | 192  | 0.6219865  | 28.826.554 | 0.0       | 0.0       | 0.0        |
| GSE3039_NKT_CELL_VS_ALPHAALPHA_CD8_TCELL_DN                                            | 194  | 0.62153625 | 28.603.885 | 0.0       | 0.0       | 0.0        |
| GSE7218_IGM_VS_IGG_SIGNAL_THROUGH_ANTIGEN_BCELL_DN                                     | 167  | 0.63035506 | 28.590.515 | 0.0       | 0.0       | 0.0        |
| GSE29618_PDC_VS_MDC_DAY7_FLU_VACCINE_DN                                                | 196  | 0.6116016  | 2.831.308  | 0.0       | 0.0       | 0.0        |
| GSE10325_LUPUS_CD4_TCELL_VS_LUPUS_BCELL_UP                                             | 191  | 0.6167437  | 28.278.859 | 0.0       | 0.0       | 0.0        |
| GSE21670_UNTREATED_VS_IL6_TREATED_STAT3_KO_CD4_TCELL_UP                                | 195  | 0.60750586 | 28.253.653 | 0.0       | 0.0       | 0.0        |
| GSE24634_IL4_VS_CTRL_TREATED_NAIVE_CD4_TCELL_DAY3_DN                                   | 195  | 0.6044646  | 28.137.617 | 0.0       | 0.0       | 0.0        |
| GSE40685_TREG_VS_FOXP3_KO_TREG_PRECURSOR_DN                                            | 192  | 0.6054523  | 28.068.964 | 0.0       | 0.0       | 0.0        |
| GSE29618_PDC_VS_MDC_DN                                                                 | 197  | 0.60266966 | 28.048.773 | 0.0       | 0.0       | 0.0        |
| GSE24634_TREG_VS_TCONV_POST_DAY10_IL4_CONVERSION_DN                                    | 198  | 0.6030286  | 2.794.308  | 0.0       | 0.0       | 0.0        |
| GSE10325_CD4_TCELL_VS_BCELL_UP                                                         | 192  | 0.60253614 | 27.873.075 | 0.0       | 0.0       | 0.0        |
| GSE43863_DAY6_EFF_VS_DAY150_MEM_LY6C_INT_XCR5POS_CD4_TCELL_DN                          | 192  | 0.60267437 | 27.776.916 | 0.0       | 0.0       | 0.0        |
| GSE37533_PPARG1_FOXP3_VS_PPARG2_FOXP3_TRANSDUCECD_CD4_TCELL_PIOGLITAZONE_TREATED_DN    | 194  | 0.6030138  | 27.767.358 | 0.0       | 0.0       | 0.0        |
| GSE10325_CD4_TCELL_VS_MYELOID_DN                                                       | 192  | 0.59901124 | 27.722.561 | 0.0       | 0.0       | 0.0        |
| GSE24634_TREG_VS_TCONV_POST_DAYS_IL4_CONVERSION_DN                                     | 196  | 0.5982204  | 27.631.793 | 0.0       | 0.0       | 0.0        |
| GSE37533_PPARG1_FOXP3_VS_FOXP3_TRANSDUCECD_CD4_TCELL_DN                                | 196  | 0.5913073  | 27.539.651 | 0.0       | 0.0       | 0.0        |
| GSE22886_NAIVE_CD8_TCELL_VS_MONOCYTE_DN                                                | 197  | 0.58943295 | 27.530.124 | 0.0       | 0.0       | 0.0        |
| GSE24634_TEFF_VS_TCONV_DAY3_IN_CULTURE_DN                                              | 189  | 0.6000759  | 27.524.643 | 0.0       | 0.0       | 0.0        |
| GSE24634_TREG_VS_TCONV_POST_DAY7_IL4_CONVERSION_DN                                     | 193  | 0.5949426  | 27.504.947 | 0.0       | 0.0       | 0.0        |
| GSE7509_UNSTIM_VS_FCGRIIB_STIM_DC_DN                                                   | 169  | 0.6110045  | 27.476.795 | 0.0       | 0.0       | 0.0        |
| GSE29618_MONOCYTE_VS_PDC_UP                                                            | 192  | 0.5880238  | 27.237.036 | 0.0       | 0.0       | 0.0        |
| GSE42021_CD24HI_VS_CD24INT_TREG_THYMUS_DN                                              | 194  | 0.5873849  | 2.712.839  | 0.0       | 0.0       | 0.0        |
| GSE21670_STAT3_KO_VS_WT_CD4_TCELL_TGFB_IL6_TREATED_DN                                  | 194  | 0.577195   | 26.852.486 | 0.0       | 0.0       | 0.0        |
| GSE13485_CTRL_VS_DAY7_YF17D_VACCINE_PBMC_DN                                            | 193  | 0.57443804 | 2.683.801  | 0.0       | 0.0       | 0.0        |
| GSE6259_33D1_POS_DC_VS_CD4_TCELL_DN                                                    | 171  | 0.58910346 | 26.680.512 | 0.0       | 0.0       | 0.0        |
| GSE39556_UNTREATED_VS_3H_POLYIC_INJ_MOUSE_CD8A_DC_UP                                   | 198  | 0.57354414 | 2.655.033  | 0.0       | 0.0       | 0.0        |
| GSE37533_PPARG2_FOXP3_VS_FOXP3_TRANSDUCECD_CD4_TCELL_DN                                | 192  | 0.57450736 | 26.519.425 | 0.0       | 0.0       | 0.0        |
| GSE42021_CD24HI_VS_CD24LOW_TCONV_THYMUS_DN                                             | 192  | 0.5721439  | 2.648.619  | 0.0       | 0.0       | 0.0        |
| GSE22886_NAIVE_TCELL_VS_MONOCYTE_DN                                                    | 197  | 0.57176703 | 26.421.485 | 0.0       | 0.0       | 0.0        |
| GSE22886_NAIVE_CD4_TCELL_VS_MONOCYTE_DN                                                | 198  | 0.57293284 | 26.408.794 | 0.0       | 0.0       | 0.0        |
| GSE30083_SP2_VS_SP4_THYMOCYTE_DN                                                       | 194  | 0.5741297  | 26.396.964 | 0.0       | 0.0       | 0.0        |
| GSE24634_TREG_VS_TCONV_POST_DAYS_IL4_CONVERSION_DN                                     | 194  | 0.5686355  | 26.377.287 | 0.0       | 0.0       | 0.0        |
| GSE22886_NAIVE_CD8_TCELL_VS_MONOCYTE_UP                                                | 192  | 0.5667605  | 26.322.428 | 0.0       | 0.0       | 0.0        |
| GSE1432_CTRL_VS_IFNG_24H_MICROGLIA_DN                                                  | 194  | 0.5679589  | 26.298.933 | 0.0       | 0.0       | 0.0        |
| GSE42021_TREG_PLN_VS_CD24INT_TREG_THYMUS_DN                                            | 197  | 0.5656652  | 26.287.413 | 0.0       | 0.0       | 0.0        |
| GSE24634_TEFF_VS_TCONV_DAY7_IN_CULTURE_DN                                              | 193  | 0.57303476 | 2.624.501  | 0.0       | 0.0       | 0.0        |
| GSE29618_BCELL_VS_MDC_DAY7_FLU_VACCINE_UP                                              | 186  | 0.57004595 | 26.189.754 | 0.0       | 0.0       | 0.0        |
| GSE22140_GERMFREE_VS_SPF_MOUSE_CD4_TCELL_UP                                            | 197  | 0.5665168  | 26.178.432 | 0.0       | 0.0       | 0.0        |
| GSE18791_CTRL_VS_NEWCASTLE_VIRUS_DC_8H_DN                                              | 186  | 0.5657469  | 26.055.024 | 0.0       | 0.0       | 0.0        |
| GSE26495_NAIVE_VS_PD1LOW_CD8_TCELL_DN                                                  | 195  | 0.5713049  | 25.996.506 | 0.0       | 0.0       | 0.0        |
| GSE42021_TREG_VS_TCONV_PLN_UP                                                          | 193  | 0.56326336 | 25.965.986 | 0.0       | 0.0       | 0.0        |
| GSE29618_BCELL_VS_PDC_UP                                                               | 185  | 0.56003845 | 25.955.148 | 0.0       | 0.0       | 0.0        |
| GSE10325_BCELL_VS_MYELOID_DN                                                           | 193  | 0.5612032  | 25.943.964 | 0.0       | 0.0       | 0.0        |
| GSE19888_ADENOSINE_A3R_INH_VS_ACT_WITH_INHIBITOR_PRETREATMENT_IN_MAST_CELL_UP          | 189  | 0.563452   | 2.593.636  | 0.0       | 0.0       | 0.0        |
| GSE2405_OH_VS_12H_A_PHAGOCYTOPHILUM_STIM_NEUTROPHIL_UP                                 | 196  | 0.56660796 | 25.821.662 | 0.0       | 0.0       | 0.0        |
| GSE29618_MONOCYTE_VS_MDC_DAY7_FLU_VACCINE_UP                                           | 196  | 0.5591251  | 25.813.847 | 0.0       | 0.0       | 0.0        |
| GSE10325_CD4_TCELL_VS_MYELOID_UP                                                       | 190  | 0.55938494 | 2.580.364  | 0.0       | 0.0       | 0.0        |
| GSE26495_NAIVE_VS_PD1HIGH_CD8_TCELL_DN                                                 | 189  | 0.56226796 | 25.675.066 | 0.0       | 0.0       | 0.0        |
| GSE2935_UV_INACTIVATED_VS_LIVE_SENDAI_VIRUS_INF_MACROPHAGE_DN                          | 170  | 0.55978376 | 2.566.302  | 0.0       | 0.0       | 0.0        |
| GSE19888_CTRL_VS_TCELL_MEMBRANES_ACT_MAST_CELL_PRETREAT_A3R_INH_DN                     | 196  | 0.5557534  | 25.637.372 | 0.0       | 0.0       | 0.0        |
| GSE40685_TREG_VS_FOXP3_KO_TREG_PRECURSOR_UP                                            | 189  | 0.5538603  | 256.216    | 0.0       | 0.0       | 0.0        |
| GSE11057_CD4_EFF_MEM_VS_PBMC_DN                                                        | 190  | 0.5568378  | 25.557.497 | 0.0       | 0.0       | 0.0        |
| GSE18791_CTRL_VS_NEWCASTLE_VIRUS_DC_10H_DN                                             | 190  | 0.5528017  | 25.461.206 | 0.0       | 0.0       | 0.0        |
| GSE29618_MONOCYTE_VS_PDC_DAY7_FLU_VACCINE_UP                                           | 198  | 0.5497834  | 25.460.868 | 0.0       | 0.0       | 0.0        |
| GSE40274_CTRL_VS_XBP1_TRANSDUCECD_ACTIVATED_CD4_TCELL_UP                               | 164  | 0.5668613  | 2.545.888  | 0.0       | 0.0       | 0.0        |
| GSE17974_IL4_AND_ANTI_IL12_VS_UNTREATED_72H_ACT_CD4_TCELL_DN                           | 184  | 0.5495284  | 25.457.964 | 0.0       | 0.0       | 0.0        |
| GSE16450_IMMATURE_VS_MATURE_NEURON_CELL_LINE_UP                                        | 173  | 0.5552355  | 25.450.575 | 0.0       | 0.0       | 0.0        |
| GSE29618_BCELL_VS_MDC_UP                                                               | 183  | 0.55712897 | 2.544.604  | 0.0       | 0.0       | 0.0        |
| GSE22886_DAY0_VS_DAY1_MONOCYTE_IN_CULTURE_UP                                           | 198  | 0.5430751  | 25.414.982 | 0.0       | 0.0       | 0.0        |
| GSE22935_WT_VS_MYD88_KO_MACROPHAGE_UP                                                  | 196  | 0.5507969  | 25.410.016 | 0.0       | 0.0       | 0.0        |
| GSE3039_ALPHAALPHA_VS_ALPHABETA_CD8_TCELL_DN                                           | 193  | 0.54679906 | 2.540.947  | 0.0       | 0.0       | 0.0        |
| GSE29618_MONOCYTE_VS_MDC_UP                                                            | 197  | 0.54700696 | 25.372.934 | 0.0       | 0.0       | 0.0        |
| GSE22886_DAY0_VS_DAY7_MONOCYTE_IN_CULTURE_UP                                           | 192  | 0.54683983 | 25.268.176 | 0.0       | 0.0       | 0.0        |
| GSE41978_ID2_KO_VS_BIM_KO_KLRG1_LOW_EFFECTOR_CD8_TCELL_UP                              | 195  | 0.5444491  | 25.228.276 | 0.0       | 0.0       | 0.0        |
| GSE10325_LUPUS_BCELL_VS_LUPUS_MYELOID_DN                                               | 198  | 0.54140544 | 25.204.027 | 0.0       | 0.0       | 0.0        |
| GSE43863_NAIVE_VS_MEMORY_TH1_CD4_TCELL_D150_LCMV_UP                                    | 165  | 0.5574333  | 25.197.978 | 0.0       | 0.0       | 0.0        |
| GSE22886_CTRL_VS_LPS_24H_DC_DN                                                         | 197  | 0.54140556 | 25.057.335 | 0.0       | 0.0       | 0.0        |
| GSE5589_LPS_AND_IL10_VS_LPS_AND_IL6_STIM_IL6_KO_MACROPHAGE_45MIN_UP                    | 195  | 0.5371887  | 25.056.481 | 0.0       | 0.0       | 0.0        |
| GSE13484_UNSTIM_VS_YF17D_VACCINE_STIM_PBMC_DN                                          | 193  | 0.5420988  | 25.042.574 | 0.0       | 0.0       | 0.0        |
| GSE18791_UNSTIM_VS_NEWCASTLE_VIRUS_DC_6H_DN                                            | 182  | 0.5470558  | 25.041.692 | 0.0       | 0.0       | 0.0        |
| GSE42021_TREG_PLN_VS_TREG_PRECURSORS_THYMUS_DN                                         | 195  | 0.535888   | 2.499.702  | 0.0       | 0.0       | 0.0        |
| GSE15767_MED_VS_SCS_MAC_LN_UP                                                          | 196  | 0.5420458  | 24.986.916 | 0.0       | 0.0       | 0.0        |
| GSE34156_UNTREATED_VS_6H_TLR1_TLR2_LIGAND_TREATED_MONOCYTE_UP                          | 191  | 0.5456084  | 24.968.505 | 0.0       | 0.0       | 0.0        |
| GSE22886_NAIVE_CD4_TCELL_VS_MONOCYTE_UP                                                | 190  | 0.5333611  | 24.962.695 | 0.0       | 0.0       | 0.0        |
| GSE13485_CTRL_VS_DAY3_YF17D_VACCINE_PBMC_DN                                            | 187  | 0.5401889  | 24.924.695 | 0.0       | 0.0       | 0.0        |
| GSE34156_TLR1_TLR2_LIGAND_VS_NOD2_AND_TLR1_TLR2_LIGAND_24H_TREATED_MONOCYTE_UP         | 192  | 0.53579164 | 24.892.778 | 0.0       | 0.0       | 0.0        |
| GSE34156_NOD2_LIGAND_VS_TLR1_TLR2_LIGAND_6H_TREATED_MONOCYTE_DN                        | 190  | 0.5413439  | 2.489.227  | 0.0       | 0.0       | 0.0        |
| GSE18791_UNSTIM_VS_NEWCASTLE_VIRUS_DC_10H_DN                                           | 183  | 0.5426382  | 2.484.994  | 0.0       | 0.0       | 0.0        |
| GSE3565_CTRL_VS_LPS_INJECTED_SPLENOCYTES_UP                                            | 168  | 0.5446187  | 24.846.754 | 0.0       | 0.0       | 0.0        |
| GSE3565_CTRL_VS_LPS_INJECTED_DUSP1_KO_SPLENOCYTES_UP                                   | 173  | 0.54407334 | 2.481.495  | 0.0       | 0.0       | 0.0        |

|                                                                           |     |            |            |     |     |     |
|---------------------------------------------------------------------------|-----|------------|------------|-----|-----|-----|
| GSE41867_MEMORY_VS_EXHAUSTED_CD8_TCELL_DAY30_LCMV_UP                      | 191 | 0.5449262  | 24.805.136 | 0.0 | 0.0 | 0.0 |
| GSE29618_BCELL_VS_MONOCYTE_DN                                             | 197 | 0.52908695 | 24.700.904 | 0.0 | 0.0 | 0.0 |
| GSE3039_CD4_TCELL_VS_ALPHABETA_CD8_TCELL_UP                               | 192 | 0.53557295 | 24.690.037 | 0.0 | 0.0 | 0.0 |
| GSE1460_DP_VS_CD4_THYMOCYTE_DN                                            | 194 | 0.5346789  | 2.468.467  | 0.0 | 0.0 | 0.0 |
| GSE3565_DUSP1_VS_WT_SPLENOCYTES_UP                                        | 160 | 0.5429443  | 246.577    | 0.0 | 0.0 | 0.0 |
| GSE20715_0H_VS_24H_OZONE_LUNG_UP                                          | 193 | 0.5318066  | 2.463.912  | 0.0 | 0.0 | 0.0 |
| GSE3982_MEMORY_CD4_TCELL_VS_BCELL_UP                                      | 188 | 0.5366534  | 24.626.667 | 0.0 | 0.0 | 0.0 |
| GSE16450_CTRL_VS_IFNA_6H_STIM_IMMATURE_NEURON_CELL_LINE_DN                | 181 | 0.53417367 | 24.610.457 | 0.0 | 0.0 | 0.0 |
| GSE21360_PRIMARY_VS_QUATERNARY_MEMORY_CD8_TCELL_UP                        | 172 | 0.5403831  | 24.529.521 | 0.0 | 0.0 | 0.0 |
| GSE3982_MEMORY_CD4_TCELL_VS_BCELL_DN                                      | 189 | 0.52734876 | 2.452.329  | 0.0 | 0.0 | 0.0 |
| GSE29618_BCELL_VS_PDC_DAY7_FLU_VACCINE_UP                                 | 184 | 0.5305333  | 24.500.794 | 0.0 | 0.0 | 0.0 |
| GSE30083_SP3_VS_SP4_THYMOCYTE_DN                                          | 194 | 0.52880925 | 2.449.545  | 0.0 | 0.0 | 0.0 |
| GSE29618_BCELL_VS_MONOCYTE_UP                                             | 184 | 0.5348974  | 24.477.165 | 0.0 | 0.0 | 0.0 |
| GSE21546_WT_VS_SAP1A_KO_DP_THYMOCYTES_UP                                  | 187 | 0.5358729  | 24.476.926 | 0.0 | 0.0 | 0.0 |
| GSE14000_UNSTIM_VS_4H_LPS_DC_DN                                           | 190 | 0.53012717 | 2.441.794  | 0.0 | 0.0 | 0.0 |
| GSE22886_CD4_TCELL_VS_BCELL_NAIVE_UP                                      | 195 | 0.52538353 | 24.391.832 | 0.0 | 0.0 | 0.0 |
| GSE17301_ACD3_ACD28_VS_ACD3_ACD28_AND_IFNA5_STIM_CD8_TCELL_DN             | 196 | 0.52574366 | 243.715    | 0.0 | 0.0 | 0.0 |
| GSE17974_0H_VS_24H_IN_VITRO_ACT_CD4_TCELL_UP                              | 172 | 0.5362164  | 2.435.692  | 0.0 | 0.0 | 0.0 |
| GSE8835_CD4_VS_CD8_TCELL_CLL_PATIENT_UP                                   | 192 | 0.5266086  | 24.296.594 | 0.0 | 0.0 | 0.0 |
| GSE45739_UNSTIM_VS_ACD3_ACD28_STIM_NRAS_KO_CD4_TCELL_DN                   | 185 | 0.5251911  | 2.422.996  | 0.0 | 0.0 | 0.0 |
| GSE29618_BCELL_VS_MDC_DAY7_FLU_VACCINE_DN                                 | 192 | 0.5276295  | 24.212.935 | 0.0 | 0.0 | 0.0 |
| GSE22196_HEALTHY_VS_OBESE_MOUSE_SKIN_GAMMADELTA_TCELL_UP                  | 193 | 0.52068007 | 24.209.986 | 0.0 | 0.0 | 0.0 |
| GSE11057_CD4_CENT_MEM_VS_PBMC_DN                                          | 188 | 0.52793384 | 242.026    | 0.0 | 0.0 | 0.0 |
| GSE18791_CTRL_VS_NEWCASTLE_VIRUS_DC_16H_DN                                | 180 | 0.5307334  | 2.417.805  | 0.0 | 0.0 | 0.0 |
| GSE22886_NAIVE_BCELL_VS_BLOOD_PLASMA_CELL_UP                              | 197 | 0.5195552  | 24.138.713 | 0.0 | 0.0 | 0.0 |
| GSE36826_WT_VS_IL1R_KO_SKIN_STAPH_AUREUS_INF_DN                           | 193 | 0.5158629  | 2.413.138  | 0.0 | 0.0 | 0.0 |
| GSE20715_0H_VS_48H_OZONE_TLR4_KO_LUNG_UP                                  | 197 | 0.5192772  | 24.127.083 | 0.0 | 0.0 | 0.0 |
| GSE23568_ID3_KO_VS_WT_CD8_TCELL_DN                                        | 196 | 0.5208354  | 24.120.326 | 0.0 | 0.0 | 0.0 |
| GSE26488_CTRL_VS_PEPTIDE_INJECTION_OT2_THYMOCYTE_DN                       | 178 | 0.5243641  | 24.103.425 | 0.0 | 0.0 | 0.0 |
| GSE11864_CSF1_PAM3CYS_VS_CSF1_IFNG_PAM3CYS_IN_MAC_DN                      | 181 | 0.5268524  | 24.102.478 | 0.0 | 0.0 | 0.0 |
| GSE10325_LUPUS_CD4_TCELL_VS_LUPUS_MYELOID_UP                              | 192 | 0.5217242  | 2.409.914  | 0.0 | 0.0 | 0.0 |
| GSE9988_ANTI_TREM1_VS_VEHICLE_TREATED_MONOCYTES_DN                        | 193 | 0.52187294 | 24.082.897 | 0.0 | 0.0 | 0.0 |
| GSE11057_NAIVE_VS_EFF_MEMORY_CD4_TCELL_DN                                 | 188 | 0.51780784 | 2.407.181  | 0.0 | 0.0 | 0.0 |
| GSE22140_GERMFREE_VS_SPF_ARTHRITIC_MOUSE_CD4_TCELL_DN                     | 196 | 0.51549435 | 24.058.292 | 0.0 | 0.0 | 0.0 |
| KAECH_NAIVE_VS_DAY15_EFF_CD8_TCELL_DN                                     | 194 | 0.5150343  | 24.044.988 | 0.0 | 0.0 | 0.0 |
| GSE6259_CD4_TCELL_VS_CD8_TCELL_DN                                         | 166 | 0.530565   | 24.025.576 | 0.0 | 0.0 | 0.0 |
| GSE36078_WT_VS_IL1R_KO_LUNG_DC_AFTER_ADS_INF_UP                           | 196 | 0.52202934 | 24.020.965 | 0.0 | 0.0 | 0.0 |
| GSE21774_CD62L_POS_CD56_BRIGHT_VS_CD62L_NEG_CD56_DIM_NK_CELL_UP           | 195 | 0.51890755 | 23.972.538 | 0.0 | 0.0 | 0.0 |
| GSE21360_PRIMARY_VS_TERTIARY_MEMORY_CD8_TCELL_DN                          | 198 | 0.51821107 | 23.962.333 | 0.0 | 0.0 | 0.0 |
| GSE21546_UNSTIM_VS_ANTI_CD3_STIM_ELK1_KO_DP_THYMOCYTES_UP                 | 169 | 0.5210479  | 2.394.978  | 0.0 | 0.0 | 0.0 |
| GSE42724_NAIVE_BCELL_VS_PLASMABLAST_UP                                    | 186 | 0.52282333 | 23.942.482 | 0.0 | 0.0 | 0.0 |
| GSE18791_CTRL_VS_NEWCASTLE_VIRUS_DC_6H_DN                                 | 192 | 0.5185075  | 23.931.754 | 0.0 | 0.0 | 0.0 |
| GSE5679_RARA_AGONIST_AM580_VS_AM580_AND_ROSIGLITAZONE_TREATED_DC_DN       | 196 | 0.51615185 | 23.921.146 | 0.0 | 0.0 | 0.0 |
| GSE22886_DC_VS_MONOCYTE_DN                                                | 194 | 0.5175825  | 2.387.968  | 0.0 | 0.0 | 0.0 |
| GSE39110_UNTREATED_VS_IL2_TREATED_CD8_TCELL_DAY6_POST_IMMUNIZATION_UP     | 196 | 0.5176619  | 23.797.839 | 0.0 | 0.0 | 0.0 |
| GSE23505_UNTREATED_VS_4DAY_IL6_IL1_IL23_TREATED_CD4_TCELL_DN              | 197 | 0.51124257 | 23.744.228 | 0.0 | 0.0 | 0.0 |
| GSE1432_CTRL_VS_IFNG_6H_MICROGLIA_DN                                      | 196 | 0.50639194 | 23.721.046 | 0.0 | 0.0 | 0.0 |
| GSE29618_BCELL_VS_MONOCYTE_DAY7_FLU_VACCINE_UP                            | 186 | 0.51709074 | 23.720.584 | 0.0 | 0.0 | 0.0 |
| GSE22886_CD8_TCELL_VS_BCELL_NAIVE_DN                                      | 188 | 0.51162404 | 23.719.964 | 0.0 | 0.0 | 0.0 |
| GSE24634_IL4_VS_CTRL_TREATED_NAIVE_CD4_TCELL_DAYS_UP                      | 197 | 0.51192063 | 23.718.724 | 0.0 | 0.0 | 0.0 |
| GSE21380_NON_TFH_VS_TFH_CD4_TCELL_UP                                      | 193 | 0.5130693  | 23.695.934 | 0.0 | 0.0 | 0.0 |
| GSE12366_GC_VS_NAIVE_BCELL_DN                                             | 186 | 0.5128391  | 23.689.303 | 0.0 | 0.0 | 0.0 |
| GSE7460_CD8_TCELL_VS_CD4_TCELL_ACT_UP                                     | 192 | 0.51255274 | 23.635.705 | 0.0 | 0.0 | 0.0 |
| GSE360_HIGH_DOSE_B_MALAYI_VS_M_TUBERCULOSIS_DC_DN                         | 196 | 0.50796264 | 23.629.944 | 0.0 | 0.0 | 0.0 |
| GSE39556_CD8A_DC_VS_NK_CELL_DN                                            | 194 | 0.5072532  | 23.593.526 | 0.0 | 0.0 | 0.0 |
| GSE10325_BCELL_VS_MYELOID_UP                                              | 186 | 0.51631826 | 23.576.076 | 0.0 | 0.0 | 0.0 |
| GSE40274_FOXP3_VS_FOXP3_AND_PBX1_TRANSDUCE_ACTIVATED_CD4_TCELL_UP         | 191 | 0.5129057  | 23.566.327 | 0.0 | 0.0 | 0.0 |
| GSE41087_WT_VS_FOXP3_MUT_ANTI_CD3_CD28_STIM_CD4_TCELL_UP                  | 193 | 0.5051582  | 23.553.324 | 0.0 | 0.0 | 0.0 |
| GSE32533_MIR17_KO_VS_MIR17_OVEREXPRESS_ACT_CD4_TCELL_UP                   | 191 | 0.5106107  | 2.347.584  | 0.0 | 0.0 | 0.0 |
| GSE43863_NAIVE_VS_MEMORY_TFH_CD4_TCELL_D150_LCMV_UP                       | 187 | 0.5088649  | 23.453.214 | 0.0 | 0.0 | 0.0 |
| GSE22601_IMMATURE_CD4_SINGLE_POSITIVE_VS_CD8_SINGLE_POSITIVE_THYMOCYTE_UP | 195 | 0.50630224 | 23.434.055 | 0.0 | 0.0 | 0.0 |
| GSE23568_CTRL_TRANSDUCE_VS_WT_CD8_TCELL_DN                                | 195 | 0.50512874 | 2.337.306  | 0.0 | 0.0 | 0.0 |
| GSE21379_WT_VS_SAP_KO_TFH_CD4_TCELL_DN                                    | 192 | 0.5005246  | 23.372.476 | 0.0 | 0.0 | 0.0 |
| KAECH_NAIVE_VS_MEMORY_CD8_TCELL_DN                                        | 197 | 0.50326645 | 23.360.474 | 0.0 | 0.0 | 0.0 |
| GSE13485_DAY1_VS_DAY7_YF17D_VACCINE_PBMC_DN                               | 189 | 0.50815964 | 23.351.016 | 0.0 | 0.0 | 0.0 |
| GSE34156_UNTREATED_VS_24H_NOD2_LIGAND_TREATED_MONOCYTE_DN                 | 194 | 0.50553775 | 23.348.298 | 0.0 | 0.0 | 0.0 |
| GSE16266_LPS_VS_HEATSHOCK_AND_LPS_STIM_MEF_UP                             | 196 | 0.5081389  | 23.342.562 | 0.0 | 0.0 | 0.0 |
| GSE8921_UNSTIM_VS_TLR1_2_STIM_MONOCYTE_24H_UP                             | 194 | 0.50722796 | 23.331.776 | 0.0 | 0.0 | 0.0 |
| GSE13485_PRE_VS_POST_YF17D_VACCINATION_PBMC_DN                            | 189 | 0.50918525 | 23.325.198 | 0.0 | 0.0 | 0.0 |
| GSE21033_CTRL_VS_POLYIC_STIM_DC_12H_UP                                    | 152 | 0.5207305  | 23.317.938 | 0.0 | 0.0 | 0.0 |
| GSE24634_IL4_VS_CTRL_TREATED_NAIVE_CD4_TCELL_DAYS_DN                      | 197 | 0.50660606 | 2.330.614  | 0.0 | 0.0 | 0.0 |
| GSE40274_CTRL_VS_FOXP3_AND_LEF1_TRANSDUCE_ACTIVATED_CD4_TCELL_UP          | 163 | 0.518905   | 23.296.413 | 0.0 | 0.0 | 0.0 |
| GSE32986_UNSTIM_VS_CURDLAN_HIGHDOSE_STIM_DC_DN                            | 184 | 0.50469214 | 23.286.362 | 0.0 | 0.0 | 0.0 |
| GSE15330_MEGAKARYOCYTE_ERYTHROID_VS_GNANULOCYTE_MONOCYTE_PROGENITOR_UP    | 173 | 0.51002616 | 2.328.037  | 0.0 | 0.0 | 0.0 |
| GSE29618_BCELL_VS_MONOCYTE_DAY7_FLU_VACCINE_DN                            | 196 | 0.5052305  | 23.265.924 | 0.0 | 0.0 | 0.0 |
| GSE17974_IL4_AND_ANTI_IL12_VS_UNTREATED_48H_ACT_CD4_TCELL_DN              | 180 | 0.5102278  | 23.253.555 | 0.0 | 0.0 | 0.0 |
| GSE24142_EARLY_THYMIC_PROGENITOR_VS_DN2_THYMOCYTE_UP                      | 196 | 0.5040198  | 23.251.872 | 0.0 | 0.0 | 0.0 |
| GSE360_CTRL_VS_M_TUBERCULOSIS_DC_DN                                       | 198 | 0.49923992 | 23.217.635 | 0.0 | 0.0 | 0.0 |
| GSE19888_ADENOSINE_A3R_INH_VS_TCELL_MEMBRANES_ACT_MAST_CELL_UP            | 191 | 0.50392425 | 23.203.065 | 0.0 | 0.0 | 0.0 |
| GSE29618_BCELL_VS_MDC_DN                                                  | 197 | 0.50398034 | 23.202.865 | 0.0 | 0.0 | 0.0 |
| GSE21360_NAIVE_VS_PRIMARY_MEMORY_CD8_TCELL_DN                             | 177 | 0.5059375  | 23.200.145 | 0.0 | 0.0 | 0.0 |
| GSE3982_DC_VS_TH1_UP                                                      | 191 | 0.49904224 | 23.192.697 | 0.0 | 0.0 | 0.0 |
| GSE16450_IMMATURE_VS_MATURE_NEURON_CELL_LINE_12H_IFNA_STIM_UP             | 195 | 0.5025294  | 23.180.916 | 0.0 | 0.0 | 0.0 |
| GSE17974_CTRL_VS_ACT_IL4_AND_ANTI_IL12_24H_CD4_TCELL_UP                   | 177 | 0.5082677  | 23.173.316 | 0.0 | 0.0 | 0.0 |
| GSE25677_MPL_VS_R848_STIM_BCELL_DN                                        | 175 | 0.5105737  | 23.170.314 | 0.0 | 0.0 | 0.0 |
| GSE3920_IFNA_VS_IFNB_TREATED_ENDOTHELIAL_CELL_DN                          | 161 | 0.51750386 | 2.311.507  | 0.0 | 0.0 | 0.0 |
| GSE14000_UNSTIM_VS_4H_LPS_DC_TRANSLATED_RNA_DN                            | 186 | 0.5040545  | 23.104.236 | 0.0 | 0.0 | 0.0 |
| GSE2706_UNSTIM_VS_2H_LPS_AND_R848_DC_DN                                   | 176 | 0.5130941  | 23.095.117 | 0.0 | 0.0 | 0.0 |
| GSE9650_NAIVE_VS_MEMORY_CD8_TCELL_DN                                      | 197 | 0.49974573 | 23.072.371 | 0.0 | 0.0 | 0.0 |



|                                                                                  |     |            |            |     |     |     |
|----------------------------------------------------------------------------------|-----|------------|------------|-----|-----|-----|
| GSE2405_S_AUREUS_VS_A_PHAGOCYTOPHILUM_NEUTROPHIL_UP                              | 196 | 0.49588305 | 2.303.453  | 0.0 | 0.0 | 0.0 |
| GSE30971_CTRL_VS_LPS_STIM_MACROPHAGE_WBP7_HET_2H_DN                              | 185 | 0.49913993 | 23.024.397 | 0.0 | 0.0 | 0.0 |
| GSE40666_UNTREATED_VS_IFNA_STIM_STAT1_KO_CD8_TCELL_90MIN_UP                      | 167 | 0.50680345 | 23.017.728 | 0.0 | 0.0 | 0.0 |
| GSE7548_NAIVE_VS_DAY7_PCC_IMMUNIZATION_CD4_TCELL_DN                              | 197 | 0.49846464 | 23.016.777 | 0.0 | 0.0 | 0.0 |
| GSE43863_TH1_VS_TFH_MEMORY_CD4_TCELL_DN                                          | 191 | 0.49902505 | 22.996.216 | 0.0 | 0.0 | 0.0 |
| GSE6259_FLT3L_INDUCED_33D1_POS_DC_VS_CD4_TCELL_UP                                | 170 | 0.5076762  | 2.299.235  | 0.0 | 0.0 | 0.0 |
| GSE18791_CTRL_VS_NEWCASTLE_VIRUS_DC_18H_DN                                       | 175 | 0.50668174 | 2.298.723  | 0.0 | 0.0 | 0.0 |
| GSE32986_CURDLAN_HIGHDOSE_VS_GMCSF_AND_CURDLAN_HIGHDOSE_STIM_DC_DN               | 197 | 0.49796677 | 22.980.063 | 0.0 | 0.0 | 0.0 |
| GSE2770_TGFB_AND_IL4_VS_IL12_TREATED_ACT_CD4_TCELL_6H_UP                         | 195 | 0.4945217  | 22.964.227 | 0.0 | 0.0 | 0.0 |
| GSE5542_UNTREATED_VS_IFNG_TREATED_EPITHELIAL_CELLS_6H_DN                         | 192 | 0.49432597 | 2.296.208  | 0.0 | 0.0 | 0.0 |
| GSE15330_LYMPHOID_MULTIPOTENT_VS_MEGAKARYOCYTE_ERYTHROID_PROGENITOR_IKAROS_KO_DN | 175 | 0.50064105 | 22.945.921 | 0.0 | 0.0 | 0.0 |
| GSE25123_WT_VS_PPARG_KO_MACROPHAGE_UP                                            | 181 | 0.4981471  | 2.294.177  | 0.0 | 0.0 | 0.0 |
| GSE3982_CTRL_VS_LPS_4H_MAC_DN                                                    | 198 | 0.49659196 | 22.938.902 | 0.0 | 0.0 | 0.0 |
| GSE6269_E_COLI_VS_STAPH_AUREUS_INF_PBMC_UP                                       | 192 | 0.4930095  | 22.936.387 | 0.0 | 0.0 | 0.0 |
| GSE12845_PRE_GC_VS_DARKZONE_GC_TONSIL_BCELL_UP                                   | 191 | 0.49965116 | 22.915.442 | 0.0 | 0.0 | 0.0 |
| GSE19198_1H_VS_24H_IL21_TREATED_TCELL_DN                                         | 188 | 0.49688432 | 22.913.964 | 0.0 | 0.0 | 0.0 |
| GSE21033_CTRL_VS_POLYIC_STIM_DC_24H_UP                                           | 147 | 0.51478773 | 22.902.446 | 0.0 | 0.0 | 0.0 |
| GSE30971_CTRL_VS_LPS_STIM_MACROPHAGE_WBP7_KO_4H_DN                               | 179 | 0.5046524  | 22.877.643 | 0.0 | 0.0 | 0.0 |
| GSE24142_EARLY_THYMIC_PROGENITOR_VS_DN2_THYMOCYTE_ADULT_UP                       | 196 | 0.4941866  | 2.287.539  | 0.0 | 0.0 | 0.0 |
| GSE41867_NAIVE_VS_DAY30_LCMV_CLONE13_EXHAUSTED_CD8_TCELL_UP                      | 185 | 0.50172466 | 2.285.844  | 0.0 | 0.0 | 0.0 |
| GSE18791_UNSTIM_VS_NEWCASTLE_VIRUS_DC_18H_DN                                     | 171 | 0.50105995 | 2.282.919  | 0.0 | 0.0 | 0.0 |
| GOLDRATH_NAIVE_VS_MEMORY_CD8_TCELL_DN                                            | 197 | 0.49288306 | 22.809.432 | 0.0 | 0.0 | 0.0 |
| GSE24634_TEFF_VS_TCONV_DAY10_IN_CULTURE_DN                                       | 198 | 0.4901694  | 2.280.326  | 0.0 | 0.0 | 0.0 |
| GSE1432_1H_VS_24H_IFNG_MICROGLIA_DN                                              | 191 | 0.49203774 | 22.758.455 | 0.0 | 0.0 | 0.0 |
| GSE16450_CTRL_VS_IFNA_6H_STIM_MATURE_NEURON_CELL_LINE_UP                         | 191 | 0.48879382 | 2.272.272  | 0.0 | 0.0 | 0.0 |
| GSE36826_WT_VS_IL1R_KO_SKIN_UP                                                   | 196 | 0.494177   | 227.223    | 0.0 | 0.0 | 0.0 |
| GSE5589_LPS_VS_LPS_AND_IL10_STIM_IL10_KO_MACROPHAGE_45MIN_DN                     | 191 | 0.4939868  | 22.701.335 | 0.0 | 0.0 | 0.0 |
| GSE41176_UNSTIM_VS_ANTI_IGM_STIM_BCELL_1H_DN                                     | 193 | 0.49421197 | 2.267.807  | 0.0 | 0.0 | 0.0 |
| GSE14415_INDUCED_TREG_VS_FOXP3_KO_INDUCED_TREG_IL2_CULTURE_UP                    | 166 | 0.50373995 | 22.653.373 | 0.0 | 0.0 | 0.0 |
| GSE39556_UNTREATED_VS_3H_POLYIC_INJ_MOUSE_CD8A_DC_DN                             | 196 | 0.4923873  | 22.648.652 | 0.0 | 0.0 | 0.0 |
| GSE5542_UNTREATED_VS_IFNG_TREATED_EPITHELIAL_CELLS_24H_UP                        | 192 | 0.4868411  | 2.262.151  | 0.0 | 0.0 | 0.0 |
| GSE40274_CTRL_VS_FOXP3_TRANSDUCE_ACTIVATED_CD4_TCELL_DN                          | 194 | 0.49133062 | 22.583.377 | 0.0 | 0.0 | 0.0 |
| GSE22886_NAIVE_TCELL_VS_DC_UP                                                    | 188 | 0.48349944 | 22.555.869 | 0.0 | 0.0 | 0.0 |
| GSE19941_UNSTIM_VS_LPS_AND_IL10_STIM_IL10_KO_MACROPHAGE_UP                       | 192 | 0.48676735 | 22.501.357 | 0.0 | 0.0 | 0.0 |
| GSE36888_STATS_AB_KNOCKIN_VS_WT_TCELL_IL2_TREATED_2H_UP                          | 192 | 0.48418158 | 2.244.524  | 0.0 | 0.0 | 0.0 |
| GSE21063_WT_VS_NFATC1_KO_3H_ANTI_IGM_STIM_BCELL_DN                               | 192 | 0.48412016 | 2.241.562  | 0.0 | 0.0 | 0.0 |
| GSE13411_PLASMA_CELL_VS_MEMORY_BCELL_DN                                          | 189 | 0.4863343  | 22.412.586 | 0.0 | 0.0 | 0.0 |
| GSE22886_NAIVE_TCELL_VS_MONOCYTE_UP                                              | 189 | 0.48731634 | 22.388.933 | 0.0 | 0.0 | 0.0 |
| GSE18791_CTRL_VS_NEWCASTLE_VIRUS_DC_12H_DN                                       | 186 | 0.48492286 | 22.370.012 | 0.0 | 0.0 | 0.0 |
| GSE22886_TCELL_VS_BCELL_NAIVE_DN                                                 | 189 | 0.48569924 | 2.236.702  | 0.0 | 0.0 | 0.0 |
| GSE45382_UNTREATED_VS_TGFB_TREATED_MACROPHAGES_UP                                | 194 | 0.48240432 | 22.353.106 | 0.0 | 0.0 | 0.0 |
| GSE32986_UNSTIM_VS_GMCSF_AND_CURDLAN_LOWDOSE_STIM_DC_DN                          | 184 | 0.490677   | 22.341.955 | 0.0 | 0.0 | 0.0 |
| GSE9988_ANTI_TREM1_VS_LOW_LPS_MONOCYTE_DN                                        | 184 | 0.4865736  | 22.334.375 | 0.0 | 0.0 | 0.0 |
| GSE19888_ADENOSINE_A3R_INH_VS_ACT_IN_MAST_CELL_DN                                | 191 | 0.4828981  | 22.306.871 | 0.0 | 0.0 | 0.0 |
| GSE29617_DAY3_VS_DAY7_TIV_FLU_VACCINE_PBMC_2008_UP                               | 173 | 0.4893639  | 22.304.456 | 0.0 | 0.0 | 0.0 |
| GSE3982_CTRL_VS_LPS_48H_DC_DN                                                    | 198 | 0.4806238  | 22.296.357 | 0.0 | 0.0 | 0.0 |
| GSE30971_WBP7_HET_VS_KO_MACROPHAGE_2H_LPS_STIM_UP                                | 185 | 0.48452875 | 22.260.232 | 0.0 | 0.0 | 0.0 |
| GSE17974_IL4_AND_ANTI_IL12_VS_UNTREATED_12H_ACT_CD4_TCELL_DN                     | 173 | 0.48827025 | 22.243.745 | 0.0 | 0.0 | 0.0 |
| GSE18791_CTRL_VS_NEWCASTLE_VIRUS_DC_14H_DN                                       | 176 | 0.48826006 | 2.223.017  | 0.0 | 0.0 | 0.0 |
| GSE14769_UNSTIM_VS_80MIN_LPS_BMDM_DN                                             | 190 | 0.47820958 | 22.223.103 | 0.0 | 0.0 | 0.0 |
| GSE3982_DC_VS_CENT_MEMORY_CD4_TCELL_UP                                           | 197 | 0.47506878 | 22.218.435 | 0.0 | 0.0 | 0.0 |
| GSE29164_UNTREATED_VS_CD8_TCELL_TREATED_MELANOMA_DAY7_UP                         | 197 | 0.4800279  | 2.219.797  | 0.0 | 0.0 | 0.0 |
| GSE4590_SMALL_VS_LARGE_PRE_BCELL_UP                                              | 170 | 0.48844194 | 22.196.152 | 0.0 | 0.0 | 0.0 |
| GSE32164_ALTERNATIVELY_ACT_M2_VS_CMYC_INHIBITED_MACROPHAGE_UP                    | 198 | 0.4835542  | 22.189.386 | 0.0 | 0.0 | 0.0 |
| GSE21546_SAP1A_KO_VS_SAP1A_KO_AND_ELK1_KO_ANTI_CD3_STIM_DP_THYMOCYTES_DN         | 194 | 0.48071897 | 22.180.774 | 0.0 | 0.0 | 0.0 |
| GSE16755_CTRL_VS_IFNA_TREATED_MAC_DN                                             | 188 | 0.48534697 | 22.171.037 | 0.0 | 0.0 | 0.0 |
| GSE9988_LOW_LPS_VS_ANTI_TREM1_AND_LPS_MONOCYTE_UP                                | 183 | 0.4887804  | 22.170.942 | 0.0 | 0.0 | 0.0 |
| GSE13547_2H_VS_12_H_ANTI_IGM_STIM_ZFX_KO_BCELL_UP                                | 159 | 0.488111   | 22.161.057 | 0.0 | 0.0 | 0.0 |
| GSE17974_CTRL_VS_ACT_IL4_AND_ANTI_IL12_48H_CD4_TCELL_UP                          | 173 | 0.48593467 | 22.159.512 | 0.0 | 0.0 | 0.0 |
| GSE30962_PRIMARY_VS_SECONDARY_CHRONIC_LCMV_INF_CD8_TCELL_DN                      | 190 | 0.47835016 | 22.120.795 | 0.0 | 0.0 | 0.0 |
| GSE9988_LPS_VS_VEHICLE_TREATED_MONOCYTE_DN                                       | 190 | 0.484151   | 22.117.474 | 0.0 | 0.0 | 0.0 |
| GSE3920_IFNA_VS_IFNG_TREATED_FIBROBLAST_UP                                       | 168 | 0.4807616  | 2.209.911  | 0.0 | 0.0 | 0.0 |
| GSE17974_IL4_AND_ANTI_IL12_VS_UNTREATED_24H_ACT_CD4_TCELL_DN                     | 170 | 0.48804948 | 22.057.142 | 0.0 | 0.0 | 0.0 |
| GSE9988_ANTI_TREM1_AND_LPS_VS_VEHICLE_TREATED_MONOCYTES_DN                       | 193 | 0.47671416 | 22.030.795 | 0.0 | 0.0 | 0.0 |
| GSE22886_TCELL_VS_BCELL_NAIVE_UP                                                 | 195 | 0.47741947 | 22.026.737 | 0.0 | 0.0 | 0.0 |
| GSE369_SOCS3_KO_VS_WT_LIVER_POST_IL6_INJECTION_DN                                | 192 | 0.47741178 | 22.025.050 | 0.0 | 0.0 | 0.0 |
| GSE21063_WT_VS_NFATC1_KO_3H_ANTI_IGM_STIM_BCELL_UP                               | 193 | 0.47213206 | 22.003.076 | 0.0 | 0.0 | 0.0 |
| GSE22935_WT_VS_MYD88_KO_MACROPHAGE_48H_MBOVIS_BCG_STIM_DN                        | 195 | 0.47407776 | 21.996.305 | 0.0 | 0.0 | 0.0 |
| GSE4984_LPS_VS_VEHICLE_CTRL_TREATED_DC_DN                                        | 188 | 0.48022953 | 21.990.538 | 0.0 | 0.0 | 0.0 |
| GSE24671_CTRL_VS_SENDAI_VIRUS_INFECTED_MOUSE_SPLENOCYTES_UP                      | 155 | 0.496528   | 21.974.323 | 0.0 | 0.0 | 0.0 |
| GSE7460_TCONV_VS_TREG_THYMUS_DN                                                  | 195 | 0.4748322  | 21.970.947 | 0.0 | 0.0 | 0.0 |
| GSE21063_WT_VS_NFATC1_KO_BCELL_UP                                                | 195 | 0.47189608 | 21.970.177 | 0.0 | 0.0 | 0.0 |
| GSE39916_B_CELL_SPLEEN_VS_PLASMA_CELL_BONE_MARROW_DN                             | 195 | 0.47380832 | 21.952.255 | 0.0 | 0.0 | 0.0 |
| GSE13522_WT_VS_IFNAR_KO_SKING_T_CRUZI_Y_STRAIN_INF_UP                            | 194 | 0.46854785 | 2.193.062  | 0.0 | 0.0 | 0.0 |
| GSE42021_TCONV_PLN_VS_CD24HI_TCONV_THYMUS_UP                                     | 196 | 0.4730644  | 21.927.862 | 0.0 | 0.0 | 0.0 |
| GSE24142_EARLY_THYMIC_PROGENITOR_VS_DN2_THYMOCYTE_FETAL_UP                       | 195 | 0.47525197 | 21.906.304 | 0.0 | 0.0 | 0.0 |
| GSE42724_MEMORY_VS_B1_BCELL_DN                                                   | 190 | 0.47458255 | 21.883.478 | 0.0 | 0.0 | 0.0 |
| GSE22886_NAIVE_BCELL_VS_NEUTROPHIL_DN                                            | 195 | 0.46569806 | 2.187.818  | 0.0 | 0.0 | 0.0 |
| GSE25123_CTRL_VS_ROSIGLITAZONE_STIM_PPARG_KO_MACROPHAGE_UP                       | 189 | 0.4744032  | 21.876.519 | 0.0 | 0.0 | 0.0 |
| GSE22886_CD8_TCELL_VS_BCELL_NAIVE_UP                                             | 194 | 0.47470498 | 2.187.426  | 0.0 | 0.0 | 0.0 |
| GSE360_DC_VS_MAC_B_MALAYI_HIGH_DOSE_DN                                           | 199 | 0.46837598 | 21.842.575 | 0.0 | 0.0 | 0.0 |
| GSE22432_PDC_VS_TGFB1_TREATEDCOMMON_DC_PROGENITOR_DN                             | 191 | 0.47015235 | 21.837.525 | 0.0 | 0.0 | 0.0 |
| GSE13484_3H_UNSTIM_VS_YF17D_VACCINE_STIM_PBMC_DN                                 | 195 | 0.4751182  | 21.821.811 | 0.0 | 0.0 | 0.0 |
| GSE19401_UNSTIM_VS_RETINOIC_ACID_AND_PAM2CSK4_STIM_FOLLICULAR_DC_DN              | 197 | 0.472734   | 21.810.045 | 0.0 | 0.0 | 0.0 |
| GSE21360_TERTIARY_VS_QUATERNARY_MEMORY_CD8_TCELL_DN                              | 171 | 0.48007688 | 21.800.985 | 0.0 | 0.0 | 0.0 |
| GSE9988_LPS_VS_LPS_AND_ANTI_TREM1_MONOCYTE_UP                                    | 187 | 0.47249505 | 21.791.952 | 0.0 | 0.0 | 0.0 |
| GSE34392_ST2_KO_VS_WT_DAY8_LCMV_EFFECTOR_CD8_TCELL_DN                            | 195 | 0.46834886 | 21.780.863 | 0.0 | 0.0 | 0.0 |
| GSE360_CTRL_VS_T_GONDII_DC_UP                                                    | 198 | 0.4666887  | 2.175.678  | 0.0 | 0.0 | 0.0 |
| GSE14699_NAIVE_VS_DELETIONAL_TOLERANCE_CD8_TCELL_DN                              | 194 | 0.47326133 | 21.742.892 | 0.0 | 0.0 | 0.0 |

|                                                                                     |     |            |            |     |     |     |
|-------------------------------------------------------------------------------------|-----|------------|------------|-----|-----|-----|
| GSE1791_CTRL_VS_NEUROMEDINU_IN_T_CELL_LINE_0.8H_DN                                  | 170 | 0.47760224 | 2.172.813  | 0.0 | 0.0 | 0.0 |
| GSE7460_CD8_TCELL_VS_TREG_ACT_UP                                                    | 194 | 0.474277   | 21.710.436 | 0.0 | 0.0 | 0.0 |
| GSE40274_CTRL_VS_LEF1_TRANSDUCED_ACTIVATED_CD4_TCELL_UP                             | 167 | 0.4804063  | 21.704.316 | 0.0 | 0.0 | 0.0 |
| GSE7219_UNSTIM_VS_LPS_AND_ANTI_CD40_STIM_NIK_NFKB2_KO_DC_UP                         | 175 | 0.47986063 | 21.690.266 | 0.0 | 0.0 | 0.0 |
| GSE22886_CD4_TCELL_VS_BCELL_NAIVE_DN                                                | 187 | 0.47396088 | 21.688.132 | 0.0 | 0.0 | 0.0 |
| GSE7852_TREG_VS_TCONV_LN_UP                                                         | 195 | 0.46426073 | 21.674.128 | 0.0 | 0.0 | 0.0 |
| GSE23568_ID3_TRANSDUCED_VS_ID3_KO_CD8_TCELL_UP                                      | 196 | 0.46800712 | 2.166.265  | 0.0 | 0.0 | 0.0 |
| GSE13485_DAY3_VS_DAY7_YF17D_VACCINE_PBMCDN                                          | 182 | 0.4721704  | 21.660.464 | 0.0 | 0.0 | 0.0 |
| GSE7219_WT_VS_NIK_NFKB2_KO_DC_DN                                                    | 167 | 0.47743645 | 2.165.174  | 0.0 | 0.0 | 0.0 |
| GSE21546_WT_VS_SAP1A_KO_AND_ELK1_KO_DP_THYMOCYTES_DN                                | 192 | 0.4665538  | 2.164.322  | 0.0 | 0.0 | 0.0 |
| GSE27670_BLIMP1_VS_LMP1_TRANSDUCED_GC_BCELL_UP                                      | 197 | 0.46826652 | 21.606.596 | 0.0 | 0.0 | 0.0 |
| GSE2770_IL12_AND_TGFB_VS_IL4_TREATED_ACT_CD4_TCELL_48H_DN                           | 170 | 0.4744711  | 2.159.924  | 0.0 | 0.0 | 0.0 |
| GSE6259_FLT3L_INDUCED_DEC205_POS_DC_VS_CD8_TCELL_DN                                 | 162 | 0.47853047 | 2.159.235  | 0.0 | 0.0 | 0.0 |
| GSE21670_UNTREATED_VS_TGFB_TREATED_STAT3_KO_CD4_TCELL_DN                            | 193 | 0.46867046 | 21.588.647 | 0.0 | 0.0 | 0.0 |
| GSE41867_DAY6_EFFECTOR_VS_DAY30_EXHAUSTED_CD8_TCELL_LCMV_CLONE13_UP                 | 188 | 0.46818286 | 21.574.066 | 0.0 | 0.0 | 0.0 |
| GSE33424_CD161_HIGH_VS_NEG_CD8_TCELL_UP                                             | 197 | 0.47114053 | 21.571.949 | 0.0 | 0.0 | 0.0 |
| GSE42021_CD24INT_VS_CD24LOW_TCONV_THYMUS_UP                                         | 191 | 0.47078153 | 21.571.367 | 0.0 | 0.0 | 0.0 |
| GSE28726_NAIVE_VS_ACTIVATED_CD4_TCELL_UP                                            | 195 | 0.4655389  | 2.156.519  | 0.0 | 0.0 | 0.0 |
| GSE43863_LY6C_INT_CXCR5POS_VS_LY6C_LOW_CXCR5NEG_EFFECTOR_CD4_TCELL_UP               | 194 | 0.4650785  | 21.554.942 | 0.0 | 0.0 | 0.0 |
| GSE4748_CYANOBACTERIUM_LPSSLIKE_VS_LPS_AND_CYANOBACTERIUM_LPSSLIKE_STIM_DC_3H_UP    | 181 | 0.47153753 | 2.153.971  | 0.0 | 0.0 | 0.0 |
| GSE39556_CD8A_DC_VS_NK_CELL_MOUSE_3H_POST_POLYIC_INJ_DN                             | 194 | 0.46534365 | 21.533.597 | 0.0 | 0.0 | 0.0 |
| GSE26343_UNSTIM_VS_LPS_STIM_NFAT5_KO_MACROPHAGE_DN                                  | 196 | 0.4595451  | 21.529.872 | 0.0 | 0.0 | 0.0 |
| GSE4984_UNTREATED_VS_GALECTIN1_TREATED_DC_DN                                        | 173 | 0.4712006  | 21.523.905 | 0.0 | 0.0 | 0.0 |
| GSE1740_MCSF_VS_MCSF_AND_IFNG_DAY2_DERIVED_MACROPHAGE_UP                            | 170 | 0.47362515 | 21.511.521 | 0.0 | 0.0 | 0.0 |
| GSE25677_MPL_VS_R848_STIM_BCELL_UP                                                  | 169 | 0.47443947 | 2.150.696  | 0.0 | 0.0 | 0.0 |
| GSE33425_CD8_ALPHAALPHA_VS_ALPHABETA_CD161_HIGH_TCELL_UP                            | 196 | 0.47060555 | 21.501.796 | 0.0 | 0.0 | 0.0 |
| GSE21670_STAT3_KO_VS_WT_CD4_TCELL_UP                                                | 190 | 0.47018543 | 21.494.055 | 0.0 | 0.0 | 0.0 |
| GSE22886_NAIVE_CD8_TCELL_VS_DC_UP                                                   | 187 | 0.46787548 | 21.489.756 | 0.0 | 0.0 | 0.0 |
| GSE40274_CTRL_VS_GATA1_TRANSDUCED_ACTIVATED_CD4_TCELL_UP                            | 127 | 0.48816493 | 2.146.635  | 0.0 | 0.0 | 0.0 |
| GSE41867_DAY15_EFFECTOR_VS_DAY30_EXHAUSTED_CD8_TCELL_LCMV_CLONE13_UP                | 188 | 0.47005567 | 21.465.504 | 0.0 | 0.0 | 0.0 |
| GSE34515_CD16_NEG_MONOCYTE_VS_DC_UP                                                 | 186 | 0.46577236 | 21.427.977 | 0.0 | 0.0 | 0.0 |
| GSE32164_RESTING_DIFFERENTIATED_VS_ALTERNATIVELY_ACT_M2_MACROPHAGE_DN               | 198 | 0.4607665  | 2.142.743  | 0.0 | 0.0 | 0.0 |
| GSE21360_NAIVE_VS_SECONDARY_MEMORY_CD8_TCELL_UP                                     | 176 | 0.46843982 | 21.420.734 | 0.0 | 0.0 | 0.0 |
| GSE13522_CTRL_VS_T_CRUZI_Y_STRAIN_INF_SKIN_IFNAR_KO_UP                              | 190 | 0.46208292 | 2.140.957  | 0.0 | 0.0 | 0.0 |
| GSE2128_CTRL_VS_MIMETOPE_NEGATIVE_SELECTION_DP_THYMOCYTE_NOD_UP                     | 190 | 0.46504503 | 21.395.655 | 0.0 | 0.0 | 0.0 |
| GSE2770_IL12_AND_TGFB_ACT_VS_ACT_CD4_TCELL_6H_UP                                    | 188 | 0.4622751  | 2.137.239  | 0.0 | 0.0 | 0.0 |
| GSE2706_UNSTIM_VS_2H_LPS_DC_DN                                                      | 180 | 0.4687535  | 21.368.735 | 0.0 | 0.0 | 0.0 |
| GSE30971_CTRL_VS_LPS_STIM_MACROPHAGE_WBP7_KO_2H_DN                                  | 185 | 0.46115106 | 21.337.783 | 0.0 | 0.0 | 0.0 |
| GSE23502_BM_VS_COLON_TUMOR_MYELOID_DERIVED_SUPPRESSOR_CELL_UP                       | 195 | 0.45848188 | 2.131.461  | 0.0 | 0.0 | 0.0 |
| GSE8621_LPS_STIM_VS_LPS_PRIMED_AND_LPS_STIM_MACROPHAGE_DN                           | 194 | 0.4562929  | 21.313.655 | 0.0 | 0.0 | 0.0 |
| GSE13547_WT_VS_ZFX_KO_BCELL_UP                                                      | 160 | 0.4696138  | 21.281.128 | 0.0 | 0.0 | 0.0 |
| GSE24634_TEFF_VS_TCONV_DAYS_IN_CULTURE_DN                                           | 190 | 0.4628396  | 21.281.085 | 0.0 | 0.0 | 0.0 |
| GSE5679_PPARG_LIGAND_ROSIGLITAZONE_VS_RARA_AGONIST_AM580_TREATED_DC_DN              | 193 | 0.46349156 | 21.280.928 | 0.0 | 0.0 | 0.0 |
| GSE12366_GC_VS_MEMORY_BCELL_DN                                                      | 189 | 0.4684872  | 212.673    | 0.0 | 0.0 | 0.0 |
| GSE34156_UNTREATED_VS_6H_NOD2_AND_TLR1_TLR2_LIGAND_TREATED_MONOCYTE_DN              | 149 | 0.48209912 | 21.262.314 | 0.0 | 0.0 | 0.0 |
| GSE18791_CTRL_VS_NEWCASTLE_VIRUS_DC_4H_DN                                           | 180 | 0.46049988 | 21.246.026 | 0.0 | 0.0 | 0.0 |
| GSE40274_CTRL_VS_FOXP3_AND_GATA1_TRANSDUCED_ACTIVATED_CD4_TCELL_UP                  | 137 | 0.48486158 | 21.243.644 | 0.0 | 0.0 | 0.0 |
| GSE3337_4H_VS_16H_IFNG_IN_CD8POS_DC_DN                                              | 193 | 0.4632178  | 212.434    | 0.0 | 0.0 | 0.0 |
| GSE2706_UNSTIM_VS_8H_R848_DC_DN                                                     | 188 | 0.46095434 | 21.223.624 | 0.0 | 0.0 | 0.0 |
| GSE30971_WBP7_HET_VS_KO_MACROPHAGE_4H_LPS_STIM_DN                                   | 184 | 0.4629978  | 21.220.315 | 0.0 | 0.0 | 0.0 |
| GSE42021_CD24HI_VS_CD24INT_TCONV_THYMUS_DN                                          | 194 | 0.45834422 | 2.121.587  | 0.0 | 0.0 | 0.0 |
| GSE14415_NATURAL_TREG_VS_FOXP3_KO_NATURAL_TREG_UP                                   | 144 | 0.4771732  | 21.215.653 | 0.0 | 0.0 | 0.0 |
| GSE37532_TREG_VS_TCONV_PPARG_KO_CD4_TCELL_FROM_VISCERALADIPOSE_TISSUE_DN            | 192 | 0.45666352 | 212.127    | 0.0 | 0.0 | 0.0 |
| GSE42021_CD24HI_VS_CD24LOW_TREG_THYMUS_DN                                           | 191 | 0.46491325 | 21.200.888 | 0.0 | 0.0 | 0.0 |
| GSE3982_BCELL_VS_CENT_MEMORY_CD4_TCELL_UP                                           | 189 | 0.46216774 | 21.185.474 | 0.0 | 0.0 | 0.0 |
| GSE3982_NKCELL_VS_TH2_UP                                                            | 186 | 0.46100783 | 2.117.391  | 0.0 | 0.0 | 0.0 |
| GSE3982_BCELL_VS_TH2_UP                                                             | 185 | 0.46348515 | 21.168.938 | 0.0 | 0.0 | 0.0 |
| GSE7219_UNSTIM_VS_LPS_AND_ANTI_CD40_STIM_DC_DN                                      | 173 | 0.46062514 | 21.156.824 | 0.0 | 0.0 | 0.0 |
| GSE37534_UNTREATED_VS_PIOGLITAZONE_TREATED_CD4_TCELL_PPARG1_AND_FOXP3_TRANSDUCED_DN | 195 | 0.461455   | 21.126.704 | 0.0 | 0.0 | 0.0 |
| GSE34156_NOD2_LIGAND_VS_TLR1_TLR2_LIGAND_6H_TREATED_MONOCYTE_UP                     | 194 | 0.45730186 | 21.124.814 | 0.0 | 0.0 | 0.0 |
| GSE19198_CTRL_VS_IL21_TREATED_TCELL_6H_UP                                           | 195 | 0.4563297  | 21.117.492 | 0.0 | 0.0 | 0.0 |
| GSE12392_WT_VS_IFNB_KO_CD8A_NEG_SPLEEN_DC_DN                                        | 192 | 0.46166265 | 21.110.554 | 0.0 | 0.0 | 0.0 |
| GSE24142_EARLY_THYMIC_PROGENITOR_VS_DN3_THYMOCYTE_UP                                | 197 | 0.45496547 | 21.107.428 | 0.0 | 0.0 | 0.0 |
| GSE43863_TFH_VS_LY6C_LOW_CXCR5NEG_EFFECTOR_CD4_TCELL_UP                             | 193 | 0.4582991  | 21.098.537 | 0.0 | 0.0 | 0.0 |
| GSE2770_TGFB_AND_IL4_ACT_VS_ACT_CD4_TCELL_2H_DN                                     | 189 | 0.46565863 | 21.094.227 | 0.0 | 0.0 | 0.0 |
| GSE22886_NAIVE_CD4_TCELL_VS_DC_UP                                                   | 184 | 0.46095458 | 21.085.207 | 0.0 | 0.0 | 0.0 |
| GSE20366_TREG_VS_NAIVE_CD4_TCELL_DN                                                 | 192 | 0.45458943 | 21.059.744 | 0.0 | 0.0 | 0.0 |
| GSE11057_PBMCDN_VS_MEM_CD4_TCELL_DN                                                 | 186 | 0.45783532 | 2.105.186  | 0.0 | 0.0 | 0.0 |
| GSE9988_ANTI_TREM1_VS_LPS_MONOCYTE_DN                                               | 184 | 0.45955306 | 2.104.928  | 0.0 | 0.0 | 0.0 |
| GSE360_T_GONDII_VS_B_MALAYI_HIGH_DOSE_DC_UP                                         | 189 | 0.46017587 | 2.102.398  | 0.0 | 0.0 | 0.0 |
| GSE36888_UNTREATED_VS_IL2_TREATED_TCELL_17H_UP                                      | 196 | 0.45376098 | 21.003.816 | 0.0 | 0.0 | 0.0 |
| GSE36476_CTRL_VS_TSST_ACT_16H_MEMORY_CD4_TCELL_YOUNG_UP                             | 191 | 0.45332247 | 20.999.799 | 0.0 | 0.0 | 0.0 |
| GSE2405_HEAT_KILLED_LYSATE_VS_LIVE_A_PHAGOCYTOPHILUM_STIM_NEUTROPHIL_9H_DN          | 196 | 0.4543881  | 2.099.699  | 0.0 | 0.0 | 0.0 |
| GSE9988_ANTI_TREM1_VS_CTRL_TREATED_MONOCYTES_DN                                     | 189 | 0.45436507 | 20.993.185 | 0.0 | 0.0 | 0.0 |
| GSE14415_INDUCED_TREG_VS_FOXP3_KO_INDUCED_TREG_DN                                   | 178 | 0.4563992  | 20.975.883 | 0.0 | 0.0 | 0.0 |
| GSE35825_UNTREATED_VS_IFNG_STIM_MACROPHAGE_UP                                       | 195 | 0.45036992 | 2.097.396  | 0.0 | 0.0 | 0.0 |
| GSE3039_NKT_CELL_VS_B2_BCELL_UP                                                     | 197 | 0.46614297 | 2.094.454  | 0.0 | 0.0 | 0.0 |
| GSE45365_NK_CELL_VS_CD11B_DC_MCMV_INFECTION_DN                                      | 196 | 0.45014536 | 20.941.217 | 0.0 | 0.0 | 0.0 |
| GSE37301_MULTIPOTENT_PROGENITOR_VS_CD4_TCELL_UP                                     | 166 | 0.46033624 | 20.938.733 | 0.0 | 0.0 | 0.0 |
| GSE21546_ELK1_KO_VS_SAP1A_KO_AND_ELK1_KO_DP_THYMOCYTES_UP                           | 178 | 0.4575959  | 20.936.275 | 0.0 | 0.0 | 0.0 |
| GSE360_L_DONOVANI_VS_M_TUBERCULOSIS_DC_DN                                           | 194 | 0.4535694  | 20.925.353 | 0.0 | 0.0 | 0.0 |
| GSE34205_RSV_VS_FLU_INF_INFANT_PBMCDN                                               | 184 | 0.4593058  | 20.921.464 | 0.0 | 0.0 | 0.0 |
| GSE5099_CLASSICAL_M1_VS_ALTERNATIVE_M2_MACROPHAGE_UP                                | 185 | 0.4541009  | 20.917.306 | 0.0 | 0.0 | 0.0 |
| GSE21774_CD62L_POS_CD56_DIM_VS_CD62L_NEG_CD56_DIM_NK_CELL_UP                        | 196 | 0.45334068 | 2.091.185  | 0.0 | 0.0 | 0.0 |
| GSE6674_UNSTIM_VS_CPG_STIM_BCELL_UP                                                 | 137 | 0.47130883 | 20.907.512 | 0.0 | 0.0 | 0.0 |
| GSE23568_ID3_TRANSDUCED_VS_ID3_KO_CD8_TCELL_DN                                      | 196 | 0.45340455 | 20.898.037 | 0.0 | 0.0 | 0.0 |
| GSE9509_LPS_VS_LPS_AND_IL10_STIM_IL10_KO_MACROPHAGE_10MIN_UP                        | 193 | 0.4511753  | 20.886.018 | 0.0 | 0.0 | 0.0 |
| GSE19198_1H_VS_24H_IL21_TREATED_TCELL_UP                                            | 196 | 0.45656258 | 20.883.815 | 0.0 | 0.0 | 0.0 |
| GSE39382_IL3_VS_IL3_IL33_TREATED_MAST_CELL_DN                                       | 191 | 0.450208   | 20.877.664 | 0.0 | 0.0 | 0.0 |

|                                                                             |     |            |            |     |     |     |
|-----------------------------------------------------------------------------|-----|------------|------------|-----|-----|-----|
| KAECH_DAY15_EFF_VS_MEMORY_CD8_TCELL_UP                                      | 194 | 0.44558233 | 20.877.185 | 0.0 | 0.0 | 0.0 |
| GSE41867_NAIVE_VS_DAY6_LCMV_ARMSTRONG_EFFECTOR_CD8_TCELL_DN                 | 193 | 0.45052204 | 20.876.858 | 0.0 | 0.0 | 0.0 |
| GSE7852_TREG_VS_TCONV_THYMUS_UP                                             | 195 | 0.45390266 | 2.087.588  | 0.0 | 0.0 | 0.0 |
| GSE13485_DAY7_VS_DAY21_YF17D_VACCINE_PBMIC_UP                               | 187 | 0.45222425 | 20.861.917 | 0.0 | 0.0 | 0.0 |
| GSE21546_WT_VS_SAP1A_KO_AND_ELK1_KO_ANTI_CD3_STIM_DP_THYMOCYTES_UP          | 184 | 0.45588583 | 20.861.037 | 0.0 | 0.0 | 0.0 |
| GSE5589_WT_VS_IL6_KO_LPS_AND_IL6_STIM_MACROPHAGE_45MIN_UP                   | 190 | 0.45223016 | 20.853.097 | 0.0 | 0.0 | 0.0 |
| GSE2405_OH_VS_3H_A_PHAGOCYTOPHILUM_STIM_NEUTROPHIL_UP                       | 193 | 0.45317912 | 20.840.805 | 0.0 | 0.0 | 0.0 |
| GSE32164_RESTING_DIFFERENTIATED_VS_CMYC_INHIBITED_MACROPHAGE_UP             | 199 | 0.4461875  | 20.840.354 | 0.0 | 0.0 | 0.0 |
| GSE30083_SP1_VS_SP4_THYMOCYTE_DN                                            | 193 | 0.4518424  | 20.836.482 | 0.0 | 0.0 | 0.0 |
| GSE23925_LIGHT_ZONE_VS_NAIVE_BCELL_UP                                       | 190 | 0.45111704 | 20.833.707 | 0.0 | 0.0 | 0.0 |
| GSE37533_PPARG1_FOXP3_VS_FOXP3_TRANSDUCE_CD4_TCELL_PIOGLITAZONE_TREATED_UP  | 194 | 0.45320398 | 20.819.492 | 0.0 | 0.0 | 0.0 |
| GSE37301_HEMATOPOIETIC_STEM_CELL_VS_CD4_TCELL_UP                            | 170 | 0.4573183  | 20.818.224 | 0.0 | 0.0 | 0.0 |
| GSE1460_INTRATHYMIC_T_PROGENITOR_VS_DP_THYMOCYTE_DN                         | 189 | 0.4497712  | 2.081.552  | 0.0 | 0.0 | 0.0 |
| GSE24026_PD1_LIGATION_VS_CTRL_IN_ACT_TCELL_LINE_UP                          | 194 | 0.45674065 | 20.811.007 | 0.0 | 0.0 | 0.0 |
| GSE14415_NATURAL_TREG_VS_TCONV_UP                                           | 147 | 0.46249485 | 2.077.071  | 0.0 | 0.0 | 0.0 |
| GSE2405_HEAT_KILLED_LYSATE_VS_LIVE_A_PHAGOCYTOPHILUM_STIM_NEUTROPHIL_24H_UP | 194 | 0.44795072 | 2.076.366  | 0.0 | 0.0 | 0.0 |
| GSE17721_0.5H_VS_24H_CPG_BMDM_DN                                            | 197 | 0.44298446 | 2.075.196  | 0.0 | 0.0 | 0.0 |
| GSE45739_UNSTIM_VS_ACD3_ACD28_STIM_WT_CD4_TCELL_UP                          | 189 | 0.44829944 | 20.737.329 | 0.0 | 0.0 | 0.0 |
| GSE11961_MEMORY_BCELL_DAY7_VS_GERMINAL_CENTER_BCELL_DAY7_DN                 | 194 | 0.45054126 | 20.729.072 | 0.0 | 0.0 | 0.0 |
| GSE11057_NAIVE_VS_CENT_MEMORY_CD4_TCELL_DN                                  | 190 | 0.4471146  | 207.162    | 0.0 | 0.0 | 0.0 |
| GSE7219_UNSTIM_VS_LPS_AND_ANTI_CD40_STIM_NIK_NFKB2_KO_DC_DN                 | 187 | 0.45405355 | 2.071.588  | 0.0 | 0.0 | 0.0 |
| GSE42088_2H_VS_24H_LEISHMANIA_INF_DC_UP                                     | 194 | 0.44933408 | 20.713.453 | 0.0 | 0.0 | 0.0 |
| GSE22432_UNTREATED_VS_TGFB1_TREATED_COMMON_DC_PROGENITOR_DN                 | 191 | 0.44961032 | 20.710.695 | 0.0 | 0.0 | 0.0 |
| GSE3982_MAST_CELL_VS_NKCELL_DN                                              | 194 | 0.44724602 | 20.709.798 | 0.0 | 0.0 | 0.0 |
| GSE43863_DAY6_EFF_VS_DAY150_MEM_TH1_CD4_TCELL_DN                            | 193 | 0.44404984 | 2.067.623  | 0.0 | 0.0 | 0.0 |
| GSE22886_NAIVE_BCELL_VS_DC_UP                                               | 191 | 0.4480627  | 2.067.546  | 0.0 | 0.0 | 0.0 |
| GSE30083_SP2_VS_SP3_THYMOCYTE_DN                                            | 195 | 0.45243165 | 20.671.806 | 0.0 | 0.0 | 0.0 |
| GSE1791_CTRL_VS_NEUROMEDININ_IN_T_CELL_LINE_3H_UP                           | 163 | 0.45560387 | 20.667.973 | 0.0 | 0.0 | 0.0 |
| GSE45739_UNSTIM_VS_ACD3_ACD28_STIM_WT_CD4_TCELL_DN                          | 195 | 0.44814634 | 20.661.094 | 0.0 | 0.0 | 0.0 |
| GSE40274_HELIOS_VS_FOXP3_AND_HELIOS_TRANSDUCE_ACTIVATED_CD4_TCELL_UP        | 193 | 0.4444372  | 2.066.041  | 0.0 | 0.0 | 0.0 |
| GSE21063_CTRL_VS_ANTI_IGM_STIM_BCELL_NFATC1_KO_16H_UP                       | 192 | 0.44915915 | 20.647.511 | 0.0 | 0.0 | 0.0 |
| GSE22886_IGG_IGA_MEMORY_BCELL_VS_BLOOD_PLASMA_CELL_UP                       | 197 | 0.44836056 | 2.064.426  | 0.0 | 0.0 | 0.0 |
| GSE1460_INTRATHYMIC_T_PROGENITOR_VS_NAIVE_CD4_TCELL_ADULT_BLOOD_DN          | 185 | 0.44893295 | 20.643.873 | 0.0 | 0.0 | 0.0 |
| GSE21063_CTRL_VS_ANTI_IGM_STIM_BCELL_8H_UP                                  | 150 | 0.45818314 | 20.640.182 | 0.0 | 0.0 | 0.0 |
| GSE6674_ANTI_IGM_VS_ANTI_IGM_AND_CPG_STIM_BCELL_UP                          | 189 | 0.44788748 | 20.629.855 | 0.0 | 0.0 | 0.0 |
| GSE7219_WT_VS_NIK_NFKB2_KO_LPS_AND_ANTI_CD40_STIM_DC_DN                     | 194 | 0.44851354 | 20.628.855 | 0.0 | 0.0 | 0.0 |
| GSE37301_PRO_BCELL_VS_CD4_TCELL_DN                                          | 157 | 0.45947337 | 2.062.446  | 0.0 | 0.0 | 0.0 |
| GSE45365_NK_CELL_VS_CD11B_DC_DN                                             | 197 | 0.44472128 | 2.060.733  | 0.0 | 0.0 | 0.0 |
| GSE37416_CTRL_VS_48H_F_TULARENSIS_LVS_NEUTROPHIL_UP                         | 177 | 0.4483629  | 20.599.785 | 0.0 | 0.0 | 0.0 |
| GSE43955_1H_VS_20H_ACT_CD4_TCELL_WITH_TGFB_IL6_DN                           | 193 | 0.4473409  | 20.599.017 | 0.0 | 0.0 | 0.0 |
| GSE25123_IL4_VS_IL4_AND_ROSILITAZONE_STIM_MACROPHAGE_DAY10_UP               | 195 | 0.44297323 | 20.598.228 | 0.0 | 0.0 | 0.0 |
| GSE41867_DAY6_VS_DAY15_LCMV_ARMSTRONG_EFFECTOR_CD8_TCELL_UP                 | 176 | 0.4528457  | 2.059.738  | 0.0 | 0.0 | 0.0 |
| GSE43863_NAIVE_VS_MEMORY_LY6C_INT_CXCR5POS_CD4_TCELL_D150_LCMV_UP           | 188 | 0.44945306 | 2.056.053  | 0.0 | 0.0 | 0.0 |
| GSE13946_CTRL_VS_DSS_COLITIS_GD_TCELL_FROM_COLON_UP                         | 174 | 0.45600298 | 20.557.318 | 0.0 | 0.0 | 0.0 |
| GSE7831_1H_VS_4H_INFLUENZA_STIM_PDC_DN                                      | 191 | 0.45013076 | 20.554.721 | 0.0 | 0.0 | 0.0 |
| GSE17974_OH_VS_48H_IN_VITRO_ACT_CD4_TCELL_UP                                | 176 | 0.44982123 | 20.547.733 | 0.0 | 0.0 | 0.0 |
| GSE7852_TREG_VS_TCONV_DN                                                    | 191 | 0.44402078 | 20.544.589 | 0.0 | 0.0 | 0.0 |
| GSE34515_CD16_POS_MONOCYTE_VS_DC_DN                                         | 189 | 0.4496385  | 20.544.155 | 0.0 | 0.0 | 0.0 |
| GSE5455_HEALTHY_VS_TUMOR_BEARING_MOUSE_SPLEEN_MONOCYTE_DN                   | 193 | 0.44237763 | 20.543.885 | 0.0 | 0.0 | 0.0 |
| GSE7219_WT_VS_NIK_NFKB2_KO_DC_UP                                            | 181 | 0.44770488 | 20.534.914 | 0.0 | 0.0 | 0.0 |
| GSE2706_2H_VS_8H_LPS_STIM_DC_DN                                             | 185 | 0.4475334  | 20.528.634 | 0.0 | 0.0 | 0.0 |
| GSE12392_WT_VS_IFNAR_KO_CD8A_NEG_SPLEEN_DC_UP                               | 194 | 0.4465973  | 20.528.085 | 0.0 | 0.0 | 0.0 |
| GSE17186_MEMORY_VS_CD21HIGH_TRANSITIONAL_BCELL_DN                           | 194 | 0.4459979  | 2.052.343  | 0.0 | 0.0 | 0.0 |
| GSE27291_OH_VS_7D_STIM_GAMMADelta_TCELL_DN                                  | 180 | 0.44623002 | 20.519.323 | 0.0 | 0.0 | 0.0 |
| GSE20715_OH_VS_48H_OZONE_LUNG_UP                                            | 195 | 0.44428232 | 2.051.924  | 0.0 | 0.0 | 0.0 |
| GSE43863_DAY6_EFF_VS_DAY150_MEM_TH1_CD4_TCELL_UP                            | 196 | 0.44080287 | 20.515.847 | 0.0 | 0.0 | 0.0 |
| GSE29164_UNTREATED_VS_CD8_TCELL_TREATED_MELANOMA_DAY3_DN                    | 195 | 0.43958235 | 20.512.714 | 0.0 | 0.0 | 0.0 |
| GSE16266_CTRL_VS_LPS_STIM_MEF_UP                                            | 185 | 0.44489238 | 20.508.726 | 0.0 | 0.0 | 0.0 |
| GSE37301_HEMATOPOIETIC_STEM_CELL_VS_RAG2_KO_NK_CELL_DN                      | 177 | 0.4521925  | 20.507.765 | 0.0 | 0.0 | 0.0 |
| GSE360_DC_VS_MAC_M_TUBERCULOSIS_UP                                          | 191 | 0.444108   | 20.504.224 | 0.0 | 0.0 | 0.0 |
| GSE21063_CTRL_VS_ANTI_IGM_STIM_BCELL_3H_UP                                  | 171 | 0.44946775 | 20.501.254 | 0.0 | 0.0 | 0.0 |
| GSE9650_NAIVE_VS_EFF_CD8_TCELL_DN                                           | 194 | 0.4439116  | 20.500.975 | 0.0 | 0.0 | 0.0 |
| GSE40068_CXCR5NEG_BCL6NEG_CD4_TCELL_VS_CXCR5POS_BCL6NEG_TFH_DN              | 193 | 0.4424583  | 20.500.243 | 0.0 | 0.0 | 0.0 |
| GSE22886_NAIVE_BCELL_VS_MONOCYTE_DN                                         | 197 | 0.4425655  | 20.486.388 | 0.0 | 0.0 | 0.0 |
| GSE360_DC_VS_MAC_T_GONDII_UP                                                | 193 | 0.4425484  | 2.047.673  | 0.0 | 0.0 | 0.0 |
| GSE11057_NAIVE_VS_MEMORY_CD4_TCELL_DN                                       | 191 | 0.4527416  | 20.455.735 | 0.0 | 0.0 | 0.0 |
| GSE2706_UNSTIM_VS_2H_R848_DC_DN                                             | 182 | 0.44487685 | 20.448.515 | 0.0 | 0.0 | 0.0 |
| GSE7509_DC_VS_MONOCYTE_WITH_FCGR2B_STIM_DN                                  | 193 | 0.44363925 | 204.462    | 0.0 | 0.0 | 0.0 |
| GSE41176_WT_VS_TAK1_KO_ANTI_IGM_STIM_BCELL_6H_DN                            | 200 | 0.43797353 | 20.436.916 | 0.0 | 0.0 | 0.0 |
| GSE360_L_DONOVANI_VS_M_TUBERCULOSIS_MAC_DN                                  | 193 | 0.4453784  | 20.435.236 | 0.0 | 0.0 | 0.0 |
| GSE14415_INDUCED_TREG_VS_FAILED_INDUCED_TREG_DN                             | 175 | 0.45013243 | 20.418.634 | 0.0 | 0.0 | 0.0 |
| GSE42021_TREG_PLN_VS_CD24LO_TREG_THYMUS_DN                                  | 193 | 0.4418102  | 204.177    | 0.0 | 0.0 | 0.0 |
| GSE14386_UNTREATED_VS_IFNA_TREATED_ACT_PBMIC_MS_PATIENT_DN                  | 148 | 0.45518538 | 20.409.095 | 0.0 | 0.0 | 0.0 |
| GSE7460_TCONV_VS_TREG_LN_DN                                                 | 198 | 0.44347525 | 20.407.822 | 0.0 | 0.0 | 0.0 |
| GSE36527_CD69_NEG_VS_POS_TREG_CD62L_LOS_KLRG1_NEG_UP                        | 195 | 0.4410229  | 20.397.542 | 0.0 | 0.0 | 0.0 |
| GSE3720_UNSTIM_VS_LPS_STIM_VD1_GAMMADelta_TCELL_DN                          | 140 | 0.46358913 | 20.396.755 | 0.0 | 0.0 | 0.0 |
| GSE13306_RA_VS_UNTREATED_MEM_CD4_TCELL_UP                                   | 189 | 0.4410889  | 2.039.373  | 0.0 | 0.0 | 0.0 |
| GSE24210_CTRL_VS_IL35_TREATED_TCONV_CD4_TCELL_UP                            | 192 | 0.44267505 | 20.386.112 | 0.0 | 0.0 | 0.0 |
| GSE10325_CD4_TCELL_VS_LUPUS_CD4_TCELL_DN                                    | 194 | 0.43912363 | 2.037.416  | 0.0 | 0.0 | 0.0 |
| GSE10325_MYELOID_VS_LUPUS_MYELOID_DN                                        | 195 | 0.44121033 | 20.369.072 | 0.0 | 0.0 | 0.0 |
| GSE34156_UNTREATED_VS_6H_NOD2_LIGAND_TREATED_MONOCYTE_DN                    | 167 | 0.45393956 | 20.356.464 | 0.0 | 0.0 | 0.0 |
| GSE7219_UNSTIM_VS_LPS_AND_ANTI_CD40_STIM_DC_UP                              | 171 | 0.44427952 | 20.351.448 | 0.0 | 0.0 | 0.0 |
| GSE23502_BM_VS_COLON_TUMOR_MYELOID_DERIVED_SUPPRESSOR_CELL_DN               | 194 | 0.44461697 | 20.350.626 | 0.0 | 0.0 | 0.0 |
| GSE15735_CTRL_VS_HDAC_INHIBITOR_TREATED_CD4_TCELL_2H_DN                     | 194 | 0.43764085 | 20.337.384 | 0.0 | 0.0 | 0.0 |
| GSE21360_NAIVE_VS_PRIMARY_MEMORY_CD8_TCELL_UP                               | 167 | 0.44926286 | 20.334.094 | 0.0 | 0.0 | 0.0 |
| GSE3982_MAST_CELL_VS_BCELL_DN                                               | 189 | 0.44140524 | 20.328.681 | 0.0 | 0.0 | 0.0 |
| GSE20366_TREG_VS_NAIVE_CD4_TCELL_HOMEOSTATIC_CONVERSION_DN                  | 191 | 0.43434587 | 20.323.982 | 0.0 | 0.0 | 0.0 |
| GSE7348_LPS_VS_TOLERIZED_AND_LPS_STIM_MACROPHAGE_DN                         | 168 | 0.44473553 | 2.030.799  | 0.0 | 0.0 | 0.0 |
| GSE9988_LOW_LPS_VS_VEHICLE_TREATED_MONOCYTE_DN                              | 189 | 0.4403302  | 20.299.182 | 0.0 | 0.0 | 0.0 |

|                                                                              |     |            |            |     |          |       |
|------------------------------------------------------------------------------|-----|------------|------------|-----|----------|-------|
| GSE3982_MAST_CELL_VS_DC_DN                                                   | 191 | 0.4399746  | 20.284.457 | 0.0 | 0.0      | 0.0   |
| GSE19401_NAIVE_VS_IMMUNIZED_MOUSE_PLN_FOLLICULAR_DC_DN                       | 195 | 0.4410898  | 20.280.874 | 0.0 | 0.0      | 0.0   |
| GSE24142_ADULT_VS_FETAL_EARLY_THYMIC_PROGENITOR_UP                           | 193 | 0.43773144 | 2.027.882  | 0.0 | 0.0      | 0.0   |
| GSE23568_CTRL_TRANSDUCECD_VS_WT_CD8_TCELL_UP                                 | 199 | 0.43693936 | 2.027.783  | 0.0 | 0.0      | 0.0   |
| GSE22886_IGM_MEMORY_BCELL_VS_BLOOD_PLASMA_CELL_UP                            | 188 | 0.43647307 | 20.254.493 | 0.0 | 0.0      | 0.0   |
| GSE2128_CTRL_VS_MIMETOPE_NEGATIVE_SELECTION_DP_THYMOCYTE_C57BL6_UP           | 175 | 0.43829265 | 20.253.222 | 0.0 | 0.0      | 0.0   |
| GSE360_LOW_DOSE_B_MALAYI_VS_M_TUBERCULOSIS_CD_DN                             | 198 | 0.43607864 | 2.024.516  | 0.0 | 0.0      | 0.0   |
| GSE42021_CD24INT_VS_CD24LOW_TREG_THYMUS_DN                                   | 191 | 0.43685392 | 2.023.531  | 0.0 | 0.0      | 0.0   |
| GSE30962_ACUTE_VS_CHRONIC_LCMV_PRIMARY_INF_CD8_TCELL_UP                      | 194 | 0.43921724 | 20.220.447 | 0.0 | 0.0      | 0.0   |
| GSE5589_LPS_VS_LPS_AND_IL10_STIM_MACROPHAGE_180MIN_UP                        | 191 | 0.438998   | 2.021.322  | 0.0 | 0.0      | 0.0   |
| GSE21360_NAIVE_VS_SECONDARY_MEMORY_CD8_TCELL_DN                              | 166 | 0.4478688  | 20.213.006 | 0.0 | 0.0      | 0.0   |
| GSE3039_B2_VS_B1_BCELL_UP                                                    | 197 | 0.43568772 | 20.160.772 | 0.0 | 0.0      | 0.0   |
| GSE3920_UNTREATED_VS_IFNA_TREATED_ENDOTHELIAL_CELL_UP                        | 170 | 0.44271624 | 20.139.244 | 0.0 | 0.0      | 0.0   |
| GSE13522_WT_VS_IFNAR_KO_SKIN_DN                                              | 174 | 0.44584084 | 20.136.712 | 0.0 | 0.0      | 0.0   |
| GSE37605_FOXP3_FUSION_GFP_VS_IRES_GFP_TREG_C57BL6_DN                         | 171 | 0.44038007 | 20.121.055 | 0.0 | 0.0      | 0.0   |
| GSE32164_RESTING_DIFFERENTIATED_VS_CMYC_INHIBITED_MACROPHAGE_DN              | 197 | 0.4322675  | 20.115.807 | 0.0 | 0.0      | 0.0   |
| GSE37532_WT_VS_PPARG_KO_VISCERAL_ADIPOSE_TISSUE_TCONV_UP                     | 191 | 0.43821415 | 20.101.616 | 0.0 | 0.0      | 0.0   |
| GSE22589_HEALTHY_VS_HIV_INFECTED_DC_DN                                       | 193 | 0.4356473  | 20.080.664 | 0.0 | 0.0      | 0.0   |
| GSE37301_CD4_TCELL_VS_GRANULOCYTE_MONOCYTE_PROGENITOR_DN                     | 177 | 0.43473342 | 1.978.925  | 0.0 | 1.92E-01 | 0.001 |
| GSE5589_WT_VS_IL10_KO_LPS_STIM_MACROPHAGE_180MIN_DN                          | 149 | 0.42183182 | 18.923.421 | 0.0 | 3.15E-01 | 0.002 |
| GSE3982_CENT_MEMORY_CD4_TCELL_VS_NKCELL_DN                                   | 196 | 0.40845618 | 18.899.952 | 0.0 | 4.72E-01 | 0.003 |
| GSE17301_CTRL_VS_48H_ACD3_ACD28_STIM_CD8_TCELL_DN                            | 196 | 0.4109751  | 18.835.075 | 0.0 | 6.19E-01 | 0.004 |
| GSE45365_NK_CELL_VS_CD8_TCELL_MCMV_INFECTION_DN                              | 195 | 0.40292332 | 18.661.779 | 0.0 | 7.44E-01 | 0.005 |
| GSE46606_DAY1_VS_DAY3_CD40L_IL2_IL5_STIMULATED_BCELL_UP                      | 167 | 0.40951663 | 18.672.168 | 0.0 | 7.47E-01 | 0.005 |
| GSE2706_LPS_VS_R848_AND_LPS_8H_STIM_DC_UP                                    | 185 | 0.40310547 | 18.553.598 | 0.0 | 1.61E+00 | 0.011 |
| GSE35825_UNTREATED_VS_IFNA_STIM_MACROPHAGE_DN                                | 162 | 0.41851997 | 19.184.349 | 0.0 | 1.69E+00 | 0.001 |
| GSE19941_UNSTIM_VS_LPS_STIM_IL10_KO_MACROPHAGE_UP                            | 192 | 0.39954573 | 18.477.964 | 0.0 | 1.71E+00 | 0.012 |
| GSE15733_BM_VS_SPLEEN_MEMORY_CD4_TCELL_UP                                    | 196 | 0.41559318 | 19.316.334 | 0.0 | 1.74E+00 | 0.001 |
| GSE19825_NAIVE_VS_IL2RAHIGH_DAY3_EFF_CD8_TCELL_UP                            | 188 | 0.42164892 | 19.346.857 | 0.0 | 1.75E+00 | 0.001 |
| GSE37416_OH_VS_48H_F_TULARENSIS_LVS_NEUTROPHIL_UP                            | 192 | 0.4199878  | 1.935.523  | 0.0 | 1.76E+00 | 0.001 |
| GSE3982_BCELL_VS_TH1_UP                                                      | 187 | 0.41485825 | 19.356.929 | 0.0 | 1.76E+00 | 0.001 |
| GSE5542_UNTREATED_VS_IFNA_TREATED_EPITHELIAL_CELLS_24H_UP                    | 194 | 0.42210215 | 19.436.531 | 0.0 | 1.78E+00 | 0.001 |
| GSE19198_CTRL_VS_IL21_TREATED_TCELL_6H_DN                                    | 189 | 0.42894372 | 19.667.516 | 0.0 | 1.87E+00 | 0.001 |
| GSE14000_UNSTIM_VS_16H_LPS_DC_DN                                             | 190 | 0.42653394 | 19.680.612 | 0.0 | 1.88E+00 | 0.001 |
| GSE26030_TH1_VS_TH17_DAY15_POST_POLARIZATION_DN                              | 195 | 0.4287299  | 19.765.271 | 0.0 | 1.91E+00 | 0.001 |
| GSE40274_CTRL_VS_FOXP3_AND_IRF4_TRANSDUCECD_ACTIVATED_CD4_TCELL_UP           | 149 | 0.44266513 | 19.811.913 | 0.0 | 1.96E+00 | 0.001 |
| GSE38681_WT_VS_LYL1_KO_LYMPHOID_PRIMED_MULTIPOTENT_PROGENITOR_DN             | 196 | 0.4291428  | 19.894.865 | 0.0 | 1.99E+00 | 0.001 |
| GSE29618_MONOCYTE_VS_PDC_DAY7_FLU_VACCINE_DN                                 | 195 | 0.3742444  | 17.298.957 | 0.0 | 2.76E+00 | 0.216 |
| GSE12366_NAIVE_VS_MEMORY_BCELL_DN                                            | 185 | 0.41266313 | 18.956.839 | 0.0 | 3.17E+00 | 0.002 |
| GSE10240_IL22_VS_IL22_AND_IL17_STIM_PRIMARY_BRONCHIAL_EPITHELIAL_CELLS_DN    | 191 | 0.41246393 | 18.957.907 | 0.0 | 3.18E+00 | 0.002 |
| GSE29618_PDC_VS_MDC_UP                                                       | 193 | 0.40557536 | 18.958.138 | 0.0 | 3.19E+00 | 0.002 |
| GSE46606_IRF4HIGH_VS_WT_CD40L_IL2_IL5_DAY3_STIMULATED_BCELL_DN               | 192 | 0.41576797 | 18.998.034 | 0.0 | 3.22E+00 | 0.002 |
| GSE3982_NEUTROPHIL_VS_CENT_MEMORY_CD4_TCELL_UP                               | 196 | 0.40852186 | 19.011.192 | 0.0 | 3.23E+00 | 0.002 |
| GSE2706_R848_VS_R848_AND_LPS_2H_STIM_DC_DN                                   | 174 | 0.41600257 | 19.012.545 | 0.0 | 3.24E+00 | 0.002 |
| GSE2706_2H_VS_8H_R848_STIM_DC_DN                                             | 181 | 0.41663915 | 1.903.317  | 0.0 | 3.24E+00 | 0.002 |
| GSE13411_NAIVE_BCELL_VS_PLASMA_CELL_UP                                       | 183 | 0.41764247 | 19.114.596 | 0.0 | 3.29E+00 | 0.002 |
| GSE41867_NAIVE_VS_DAY6_LCMV_EFFECTOR_CD8_TCELL_DN                            | 192 | 0.41423753 | 19.121.825 | 0.0 | 3.31E+00 | 0.002 |
| GSE41867_NAIVE_VS_DAY6_LCMV_EFFECTOR_CD8_TCELL_UP                            | 190 | 0.41640675 | 19.122.186 | 0.0 | 3.31E+00 | 0.002 |
| GSE37605_FOXP3_FUSION_GFP_VS_IRES_GFP_TREG_NOD_DN                            | 166 | 0.41700998 | 19.124.554 | 0.0 | 3.32E+00 | 0.002 |
| GSE28783_ANTI_MIR33_VS_UNTREATED_ATHEROSCLEROSIS_MACROPHAGE_DN               | 193 | 0.4166548  | 1.917.121  | 0.0 | 3.35E+00 | 0.002 |
| GSE37416_12H_VS_24H_F_TULARENSIS_LVS_NEUTROPHIL_UP                           | 188 | 0.39404458 | 18.261.119 | 0.0 | 3.61E+00 | 0.027 |
| GSE2405_OH_VS_1.5H_A_PHAGOCYTOPHILUM_STIM_NEUTROPHIL_UP                      | 192 | 0.4094202  | 18.891.547 | 0.0 | 4.70E+00 | 0.003 |
| GSE22601_IMMATURE_CD4_SINGLE_POSITIVE_VS_CD8_SINGLE_POSITIVE_THYMOCYTE_DN    | 193 | 0.40385696 | 18.898.504 | 0.0 | 4.71E+00 | 0.003 |
| GSE38304_MYC_NEG_VS_POS_GC_BCELL_DN                                          | 197 | 0.38708577 | 18.013.325 | 0.0 | 5.77E+00 | 0.042 |
| GSE25087_TREG_VS_TCONV_ADULT_UP                                              | 187 | 0.41192222 | 18.782.989 | 0.0 | 6.09E+00 | 0.004 |
| GSE24634_IL4_VS_CTRL_TREATED_NAIVE_CD4_TCELL_DAY10_UP                        | 194 | 0.40781584 | 18.787.631 | 0.0 | 6.11E+00 | 0.004 |
| GSE9960_HEALTHY_VS_GRAM_POS_SEPSIS_PBMC_DN                                   | 186 | 0.409392   | 18.795.303 | 0.0 | 6.14E+00 | 0.004 |
| GSE39820_IL1B_IL6_VS_IL1B_IL6_IL23A_TREATED_CD4_TCELL_UP                     | 189 | 0.40973893 | 18.821.831 | 0.0 | 6.17E+00 | 0.004 |
| GSE45365_HEALTHY_VS_MCMV_INFECTION_CD8A_DC_IFNAR_KO_DN                       | 196 | 0.40522677 | 18.832.173 | 0.0 | 6.18E+00 | 0.004 |
| GSE27859_MACROPHAGE_VS_CD11C_INT_F480_INT_DC_UP                              | 164 | 0.39356166 | 17.936.472 | 0.0 | 6.61E+00 | 0.05  |
| GSE18893_TCONV_VS_TREG_24H_CULTURE_DN                                        | 195 | 0.39969933 | 18.651.206 | 0.0 | 7.40E+00 | 0.005 |
| GSE11057_CD4_CENT_MEM_VS_PBMC_UP                                             | 190 | 0.40162906 | 18.657.885 | 0.0 | 7.42E+00 | 0.005 |
| GSE30083_SP1_VS_SP3_THYMOCYTE_DN                                             | 192 | 0.404932   | 18.668.941 | 0.0 | 7.46E+00 | 0.005 |
| GSE3982_DC_VS_CENT_MEMORY_CD4_TCELL_DN                                       | 195 | 0.40652278 | 18.691.642 | 0.0 | 7.49E+00 | 0.005 |
| GSE45739_UNSTIM_VS_ACD3_ACD28_STIM_NRAS_KO_CD4_TCELL_UP                      | 191 | 0.40400827 | 18.721.552 | 0.0 | 7.52E+00 | 0.005 |
| GSE3691_CONVENTIONAL_VS_PLASMACYTOID_DC_SPLEEN_UP                            | 196 | 0.40545902 | 18.725.011 | 0.0 | 7.53E+00 | 0.005 |
| GSE17721_CTRL_VS_POLYIC_4H_BMDM_DN                                           | 193 | 0.40582362 | 18.735.211 | 0.0 | 7.54E+00 | 0.005 |
| GSE339_CD4POS_VS_CD8POS_DC_UP                                                | 197 | 0.40519258 | 18.742.645 | 0.0 | 7.56E+00 | 0.005 |
| GSE24142_EARLY_THYMIC_PROGENITOR_VS_DN3_THYMOCYTE_FETAL_UP                   | 197 | 0.40613893 | 18.753.153 | 0.0 | 7.57E+00 | 0.005 |
| GSE9316_IL6_KO_VS_IFNG_KO_INVIVO_EXPANDED_CD4_TCELL_UP                       | 195 | 0.40355873 | 18.623.713 | 0.0 | 8.84E+00 | 0.006 |
| GSE22589_SIV_VS_HIV_AND_SIV_INFECTED_DC_UP                                   | 194 | 0.40235302 | 18.644.093 | 0.0 | 8.85E+00 | 0.006 |
| GSE27241_CTRL_VS_DIGOXIN_TREATED_CD4_TCELL_IN_TH17_POLARIZING_CONDITIONS_DN  | 188 | 0.40358838 | 18.610.165 | 0.0 | 1.03E+01 | 0.007 |
| GSE5542_UNTREATED_VS_IFNA_AND_IFNG_TREATED_EPITHELIAL_CELLS_6H_DN            | 187 | 0.3996698  | 18.549.106 | 0.0 | 1.61E+01 | 0.011 |
| GSE3982_DC_VS_EFF_MEMORY_CD4_TCELL_UP                                        | 191 | 0.41590732 | 19.189.295 | 0.0 | 1.69E+01 | 0.001 |
| GSE3982_DC_VS_BCELL_UP                                                       | 194 | 0.42042544 | 19.194.164 | 0.0 | 1.70E+01 | 0.001 |
| GSE20715_OH_VS_24H_OZONE_TLR4_KO_LUNG_UP                                     | 192 | 0.4140944  | 19.197.625 | 0.0 | 1.70E+01 | 0.001 |
| GSE14699_DELETIONAL_TOLERANCE_VS_ACTIVATED_CD8_TCELL_UP                      | 176 | 0.41584125 | 19.203.142 | 0.0 | 1.70E+01 | 0.001 |
| GSE13522_CTRL_VS_T_CRUZI_Y_STRAIN_INF_SKIN_IFNAR_KO_DN                       | 193 | 0.41287553 | 19.210.421 | 0.0 | 1.70E+01 | 0.001 |
| GSE36476_CTRL_VS_TSST_ACT_40H_MEMORY_CD4_TCELL_OLD_UP                        | 188 | 0.41390187 | 19.224.367 | 0.0 | 1.71E+01 | 0.001 |
| GSE40274_XBP1_VS_FOXP3_AND_XBP1_TRANSDUCECD_ACTIVATED_CD4_TCELL_UP           | 197 | 0.4129054  | 19.234.641 | 0.0 | 1.71E+01 | 0.001 |
| GSE17580_UNINFECTED_VS_S_MANSONI_INF_TEFF_DN                                 | 194 | 0.41730204 | 19.238.007 | 0.0 | 1.71E+01 | 0.001 |
| GSE5455_EX_VIVO_VS_POST_24H_INCUBATION_MONOCYTES_FROM_TUMOR_BEARING_MOUSE_DN | 196 | 0.41678992 | 19.240.035 | 0.0 | 1.72E+01 | 0.001 |
| GSE22432_CDC_VS_COMMON_DC_PROGENITOR_UP                                      | 196 | 0.4137191  | 19.243.811 | 0.0 | 1.72E+01 | 0.001 |
| GSE21670_TGFB_VS_IL6_TREATED_STAT3_KO_CD4_TCELL_DN                           | 193 | 0.42334303 | 19.279.047 | 0.0 | 1.72E+01 | 0.001 |
| GSE43863_TFH_VS_LY6C_LOW_CXCR5NEG_EFFECTOR_CD4_TCELL_DN                      | 196 | 0.41495237 | 19.282.951 | 0.0 | 1.73E+01 | 0.001 |
| GSE360_L_DONOVANI_VS_B_MALAYI_HIGH_DOSE_MAC_DN                               | 197 | 0.41932404 | 19.294.554 | 0.0 | 1.73E+01 | 0.001 |
| GSE17974_OH_VS_4H_IN_VITRO_ACT_CD4_TCELL_UP                                  | 177 | 0.41910824 | 19.298.744 | 0.0 | 1.73E+01 | 0.001 |
| GSE21360_SECONDARY_VS_QUATERNARY_MEMORY_CD8_TCELL_UP                         | 174 | 0.42661306 | 19.310.918 | 0.0 | 1.73E+01 | 0.001 |
| GSE25146_UNSTIM_VS_HELIOBACTER_PYLORI_LPS_STIM_AGS_CELL_DN                   | 160 | 0.38944635 | 17.559.851 | 0.0 | 1.73E+01 | 0.133 |

|          |                                                                             |     |            |            |     |          |       |
|----------|-----------------------------------------------------------------------------|-----|------------|------------|-----|----------|-------|
| GSE14415 | INDUCED_TREG_VS_FOXP3_KO_INDUCED_TREG_IL2_CULTURE_DN                        | 122 | 0.44699293 | 19.312.632 | 0.0 | 1,74E+01 | 0.001 |
| GSE23114 | PERITONEAL_CAVITY_B1A_BCELL_VS_SPLEEN_BCELL_IN_SLE2C1_MOUSE_UP              | 196 | 0.41561565 | 19.320.871 | 0.0 | 1,74E+01 | 0.001 |
| GSE18281 | CORTICAL_VS_MEDULLARY_THYMOCYTE_UP                                          | 197 | 0.41914338 | 19.343.455 | 0.0 | 1,75E+01 | 0.001 |
| GSE14000 | 4H_VS_16H_LPS_DC_TRANSLATED_RNA_UP                                          | 189 | 0.41751036 | 19.350.033 | 0.0 | 1,75E+01 | 0.001 |
| GSE24574 | NAIVE_VS_TCONV_CD4_TCELL_UP                                                 | 195 | 0.41737273 | 19.360.598 | 0.0 | 1,76E+01 | 0.001 |
| GSE40274 | FOXP3_VS_FOXP3_AND_IRF4_TRANSDUCED_ACTIVATED_CD4_TCELL_DN                   | 190 | 0.41905516 | 19.386.299 | 0.0 | 1,77E+01 | 0.001 |
| GSE46606 | UNSTIM_VS_CD40L_IL2_IL5_DDAY_STIMULATED_IRF4_KO_BCELL_UP                    | 193 | 0.4251358  | 19.396.238 | 0.0 | 1,77E+01 | 0.001 |
| GSE6875  | TCONV_VS_FOXP3_KO_TREG_UP                                                   | 192 | 0.41729772 | 19.396.989 | 0.0 | 1,77E+01 | 0.001 |
| GSE10240 | CTRL_VS_IL22_STIM_PRIMARY_BRONCHIAL_EPITHELIAL_CELLS_UP                     | 192 | 0.41981164 | 19.402.821 | 0.0 | 1,78E+01 | 0.001 |
| GSE37532 | WT_VS_PPARG_KO_LN_TCONV_UP                                                  | 191 | 0.42045024 | 19.417.205 | 0.0 | 1,78E+01 | 0.001 |
| GSE7852  | LN_VS_THYMUS_TREG_UP                                                        | 190 | 0.42056668 | 19.431.235 | 0.0 | 1,78E+01 | 0.001 |
| GSE4590  | PRE_BCELL_VS_VPREB_POS_LARGE_PRE_BCELL_UP                                   | 150 | 0.4375535  | 19.438.677 | 0.0 | 1,79E+01 | 0.001 |
| GSE1460  | INTRATHYMIC_T_PROGENITOR_VS_THYMIC_STROMAL_CELL_DN                          | 194 | 0.4180385  | 19.457.738 | 0.0 | 1,79E+01 | 0.001 |
| GSE16385 | ROSLIGLITAZONE_IFNG_TNF_VS_IL4_STIM_MACROPHAGE_UP                           | 192 | 0.42041895 | 19.468.559 | 0.0 | 1,79E+01 | 0.001 |
| GSE23502 | WT_VS_HDC_KO_MYELOID_DERIVED_SUPPRESSOR_CELL_BM_UP                          | 196 | 0.41983184 | 1.948.181  | 0.0 | 1,80E+01 | 0.001 |
| GSE26030 | TH1_VS_TH17_DAYS_POST_POLARIZATION_UP                                       | 193 | 0.42370847 | 19.488.112 | 0.0 | 1,80E+01 | 0.001 |
| GSE32901 | NAIVE_VS_TH17_ENRICHED_CD4_TCELL_UP                                         | 147 | 0.43534115 | 19.512.625 | 0.0 | 1,80E+01 | 0.001 |
| GSE6092  | UNSTIM_VS_IFNG_STIM_ENDOTHELIAL_CELL_DN                                     | 194 | 0.42194173 | 19.516.658 | 0.0 | 1,81E+01 | 0.001 |
| GSE7852  | LN_VS_FAT_TCONV_DN                                                          | 197 | 0.42335168 | 19.518.193 | 0.0 | 1,81E+01 | 0.001 |
| GSE20727 | ROS_INH_VS_ROS_INH_AND_DNFB_ALLERGEN_TREATED_DC_UP                          | 190 | 0.42416826 | 19.522.028 | 0.0 | 1,81E+01 | 0.001 |
| GSE18281 | SUBCAPSULAR_VS_CENTRAL_CORTICAL_REGION_OF_THYMUS_DN                         | 194 | 0.4193761  | 19.525.381 | 0.0 | 1,82E+01 | 0.001 |
| GSE3400  | UNTREATED_VS_IFNB_TREATED_MEF_DN                                            | 164 | 0.43088427 | 19.531.037 | 0.0 | 1,82E+01 | 0.001 |
| GSE15735 | 2H_VS_12H_HDAC_INHIBITOR_TREATED_CD4_TCELL_UP                               | 195 | 0.42666712 | 19.531.647 | 0.0 | 1,82E+01 | 0.001 |
| GSE5679  | CTRL_VS_PPARG_LIGAND_ROSLIGLITAZONE_AND_RARA_AGONIST_AM580_TREATED_DC_DN    | 197 | 0.3787412  | 1.752.788  | 0.0 | 1,83E+01 | 0.142 |
| GSE9601  | NFKB_INHIBITOR_VS_PI3K_INHIBITOR_TREATED_HCMV_INF_MONOCYTE_DN               | 194 | 0.42215046 | 19.557.399 | 0.0 | 1,83E+01 | 0.001 |
| GSE9316  | IL6_KO_VS_IFNG_KO_INVIVO_EXPANDED_CD4_TCELL_DN                              | 196 | 0.42017084 | 1.955.873  | 0.0 | 1,83E+01 | 0.001 |
| GSE10325 | LUPUS_BCELL_VS_LUPUS_MYELOID_UP                                             | 188 | 0.4031823  | 18.435.526 | 0.0 | 1,83E+01 | 0.013 |
| GSE28783 | ANTI_MIR33_VS_CTRL_ATHEROSCLEROSIS_MACROPHAGE_UP                            | 196 | 0.4261015  | 19.579.564 | 0.0 | 1,83E+01 | 0.001 |
| GSE24574 | BCL6_HIGH_TFH_VS_TCONV_CD4_TCELL_DN                                         | 190 | 0.42631465 | 19.591.476 | 0.0 | 1,84E+01 | 0.001 |
| GSE19198 | 1H_VS_6H_IL21_TREATED_TCELL_UP                                              | 157 | 0.43962258 | 19.601.657 | 0.0 | 1,84E+01 | 0.001 |
| GSE22886 | IGG_IGA_MEMORY_BCELL_VS_BM_PLASMA_CELL_UP                                   | 197 | 0.4292276  | 19.603.268 | 0.0 | 1,85E+01 | 0.001 |
| GSE3982  | DC_VS_TH2_UP                                                                | 191 | 0.4237434  | 196.038    | 0.0 | 1,85E+01 | 0.001 |
| GSE17721 | LPS_VS_POLYIC_24H_BMDM_DN                                                   | 194 | 0.42467314 | 19.604.222 | 0.0 | 1,85E+01 | 0.001 |
| GSE27786 | LIN_NEG_VS_NKCELL_DN                                                        | 190 | 0.42513114 | 19.613.541 | 0.0 | 1,86E+01 | 0.001 |
| GSE22140 | HEALTHY_VS_ARTHRITIC_GERMFREE_MOUSE_CD4_TCELL_DN                            | 197 | 0.42166626 | 19.619.862 | 0.0 | 1,86E+01 | 0.001 |
| GSE41867 | DAY6_EFFECTOR_VS_DAY30_MEMORY_CD8_TCELL_LCMV_ARMSTRONG_UP                   | 191 | 0.4269997  | 1.963.507  | 0.0 | 1,86E+01 | 0.001 |
| GSE36476 | CTRL_VS_TSST_ACT_16H_MEMORY_CD4_TCELL_OLD_UP                                | 188 | 0.42720014 | 19.649.776 | 0.0 | 1,87E+01 | 0.001 |
| GSE40666 | NAIVE_VS_EFFECTOR_CD8_TCELL_WITH_IFNA_STIM_90MIN_UP                         | 193 | 0.4256708  | 19.668.424 | 0.0 | 1,87E+01 | 0.001 |
| GSE22140 | GERMFREE_VS_SPF_MOUSE_CD4_TCELL_DN                                          | 198 | 0.42470995 | 1.969.581  | 0.0 | 1,88E+01 | 0.001 |
| GSE36888 | UNTREATED_VS_IL2_TREATED_TCELL_6H_UP                                        | 186 | 0.4289734  | 1.969.933  | 0.0 | 1,88E+01 | 0.001 |
| GSE1740  | UNSTIM_VS_IFNA_STIMULATED_MCSF_DERIVED_MACROPHAGE_DN                        | 176 | 0.4304718  | 19.699.507 | 0.0 | 1,89E+01 | 0.001 |
| GSE22140 | HEALTHY_VS_ARTHRITIC_MOUSE_CD4_TCELL_UP                                     | 199 | 0.42709666 | 1.970.048  | 0.0 | 1,89E+01 | 0.001 |
| GSE22601 | DOUBLE_POSITIVE_VS_CD8_SINGLE_POSITIVE_THYMOCYTE_UP                         | 195 | 0.4264542  | 19.744.307 | 0.0 | 1,89E+01 | 0.001 |
| GSE29618 | MONOCYTE_VS_MDC_DAY7_FLU_VACCINE_DN                                         | 193 | 0.428545   | 19.749.215 | 0.0 | 1,90E+01 | 0.001 |
| GSE43863 | LY6C_INT_CXCR5POS_VS_LY6C_LOW_CXCR5NEG_EFFECTOR_CD4_TCELL_DN                | 192 | 0.4274497  | 19.752.784 | 0.0 | 1,90E+01 | 0.001 |
| GSE40666 | UNTREATED_VS_IFNA_STIM_STAT1_KO_CD8_TCELL_90MIN_DN                          | 187 | 0.42902535 | 19.753.462 | 0.0 | 1,91E+01 | 0.001 |
| GSE17974 | 0H_VS_12H_IN_VITRO_ACT_CD4_TCELL_UP                                         | 177 | 0.43679902 | 19.776.126 | 0.0 | 1,91E+01 | 0.001 |
| GSE42724 | NAIVE_BCELL_VS_PLASMABLAST_DN                                               | 185 | 0.4303286  | 19.778.886 | 0.0 | 1,92E+01 | 0.001 |
| GSE22886 | NAIVE_VS_IGM_MEMORY_BCELL_DN                                                | 191 | 0.4239848  | 19.784.406 | 0.0 | 1,92E+01 | 0.001 |
| GSE22886 | NAIVE_VS_IGG_IGA_MEMORY_BCELL_DN                                            | 193 | 0.43109637 | 19.790.683 | 0.0 | 1,93E+01 | 0.001 |
| GSE22229 | UNTREATED_VS_IMMUNOSUPP_THERAPY_RENAL_TRANSPLANT_PATIENT_PBMCDN             | 196 | 0.42346224 | 19.791.352 | 0.0 | 1,93E+01 | 0.001 |
| GSE360   | CTRL_VS_L_DONOVANI_DC_DN                                                    | 194 | 0.42119852 | 19.793.603 | 0.0 | 1,94E+01 | 0.001 |
| GSE8835  | CD4_VS_CD8_TCELL_CLL_PATIENT_DN                                             | 187 | 0.42951068 | 19.798.174 | 0.0 | 1,94E+01 | 0.001 |
| GSE37301 | PRO_BCELL_VS GRANULOCYTE_MONOCYTE_PROGENITOR_UP                             | 138 | 0.44849095 | 19.801.126 | 0.0 | 1,94E+01 | 0.001 |
| GSE17721 | PAM3CSK4_VS_CPG_4H_BMDM_DN                                                  | 197 | 0.42918032 | 1.980.795  | 0.0 | 1,95E+01 | 0.001 |
| GSE25123 | WT_VS_PPARG_KO_MACROPHAGE_IL4_STIM_DN                                       | 195 | 0.42601243 | 19.808.742 | 0.0 | 1,95E+01 | 0.001 |
| GSE17974 | CTRL_VS_ACT_IL4_AND_ANTI_IL12_4H_CD4_TCELL_UP                               | 180 | 0.43158454 | 19.814.988 | 0.0 | 1,96E+01 | 0.001 |
| GSE40274 | CTRL_VS_FOXP3_AND_EOS_TRANSDUCED_ACTIVATED_CD4_TCELL_UP                     | 159 | 0.43646246 | 19.822.725 | 0.0 | 1,96E+01 | 0.001 |
| GSE22886 | DAY1_VS_DAY7_MONOCYTE_IN_CULTURE_UP                                         | 197 | 0.42667702 | 19.824.138 | 0.0 | 1,97E+01 | 0.001 |
| GSE19888 | ADENOSINE_A3R_INH_VS_INH_PRETREAT_AND_ACT_WITH_TCELL_MEMBRANES_MAST_CELL_UP | 191 | 0.42658666 | 19.844.786 | 0.0 | 1,97E+01 | 0.001 |
| GSE24142 | EARLY_THYMIC_PROGENITOR_VS_DN2_THYMOCYTE_DN                                 | 195 | 0.42801425 | 19.848.142 | 0.0 | 1,98E+01 | 0.001 |
| GSE3039  | CD4_TCELL_VS_B2_BCELL_UP                                                    | 193 | 0.42749912 | 19.864.384 | 0.0 | 1,98E+01 | 0.001 |
| GSE17974 | CTRL_VS_ACT_IL4_AND_ANTI_IL12_12H_CD4_TCELL_UP                              | 173 | 0.43456188 | 19.868.143 | 0.0 | 1,98E+01 | 0.001 |
| GSE24142 | EARLY_THYMIC_PROGENITOR_VS_DN3_THYMOCYTE_ADULT_UP                           | 194 | 0.43168327 | 19.882.936 | 0.0 | 1,99E+01 | 0.001 |
| GSE4535  | BM_DERIVED_DC_VS_FOLLICULAR_DC_UP                                           | 190 | 0.43441835 | 19.903.942 | 0.0 | 2,00E+01 | 0.001 |
| GSE22611 | NOD2_TRANSDUCED_VS_CTRL_HEK293T_STIMULATED_WITH_MDP_2H_UP                   | 172 | 0.4330478  | 19.909.571 | 0.0 | 2,00E+01 | 0.001 |
| GSE40274 | CTRL_VS_FOXP3_AND_XBP1_TRANSDUCED_ACTIVATED_CD4_TCELL_DN                    | 151 | 0.4466829  | 19.914.526 | 0.0 | 2,00E+01 | 0.001 |
| GSE33374 | CD8_ALPHAALPHA_VS_ALPHABETA_CD161_HIGH_TCELL_DN                             | 196 | 0.43414932 | 19.924.201 | 0.0 | 2,01E+01 | 0.001 |
| GSE9988  | ANTI_TREM1_VS_ANTI_TREM1_AND_LPS_MONOCYTE_DN                                | 174 | 0.43958834 | 19.949.412 | 0.0 | 2,01E+01 | 0.001 |
| GSE5542  | UNTREATED_VS_IFNA_TREATED_EPITHELIAL_CELLS_6H_UP                            | 183 | 0.436288   | 19.955.696 | 0.0 | 2,02E+01 | 0.001 |
| GSE360   | T_GONDII_VS_B_MALAYI_LOW_DOSE_DC_DN                                         | 197 | 0.43317193 | 19.961.293 | 0.0 | 2,02E+01 | 0.001 |
| GSE16385 | IFNG_TNF_VS_IL4_STIM_MACROPHAGE_UP                                          | 194 | 0.43271452 | 19.962.975 | 0.0 | 2,02E+01 | 0.001 |
| GSE21927 | SPLEEN_C57BL6_VS_4T1_TUMOR_BALBC_MONOCYTES_DN                               | 194 | 0.43473426 | 19.965.426 | 0.0 | 2,03E+01 | 0.001 |
| GSE2585  | CD80_HIGH_VS_LOW_AIRE_KO_MTEC_UP                                            | 192 | 0.4301445  | 19.980.192 | 0.0 | 2,03E+01 | 0.001 |
| GSE6259  | FLT3L_INDUCED_VS_WT_SPLENIC_DC_33D1_POS_UP                                  | 160 | 0.44526765 | 19.984.959 | 0.0 | 2,04E+01 | 0.001 |
| GSE360   | T_GONDII_VS_M_TUBERCULOSIS_DC_DN                                            | 196 | 0.43391418 | 19.996.461 | 0.0 | 2,04E+01 | 0.001 |
| GSE26290 | CTRL_VS_AKT_INHIBITOR_TREATED_ANTI_CD3_AND_IL2_STIM_CD8_TCELL_DN            | 193 | 0.4330679  | 19.996.731 | 0.0 | 2,04E+01 | 0.001 |
| GSE29618 | MONOCYTE_VS_MDC_DN                                                          | 194 | 0.43360317 | 19.998.255 | 0.0 | 2,05E+01 | 0.001 |
| GSE21670 | UNTREATED_VS_TGFB_TREATED_CD4_TCELL_DN                                      | 187 | 0.4342021  | 19.998.819 | 0.0 | 2,05E+01 | 0.001 |
| GSE24634 | IL4_VS_CTRL_TREATED_NAIVE_CD4_TCELL_DAY3_UP                                 | 192 | 0.43319455 | 20.003.796 | 0.0 | 2,06E+01 | 0.001 |
| GSE17974 | 0H_VS_6H_IN_VITRO_ACT_CD4_TCELL_UP                                          | 171 | 0.44326702 | 20.018.487 | 0.0 | 2,06E+01 | 0.001 |
| GSE17974 | CTRL_VS_ACT_IL4_AND_ANTI_IL12_6H_CD4_TCELL_UP                               | 177 | 0.43906164 | 20.019.774 | 0.0 | 2,07E+01 | 0.001 |
| GSE19772 | CTRL_VS_HCMV_INF_MONOCYTES_UP                                               | 197 | 0.4363654  | 20.031.533 | 0.0 | 2,07E+01 | 0.001 |
| GSE4590  | LARGE_PRE_BCELL_VS_VPREB_POS_LARGE_PRE_BCELL_DN                             | 178 | 0.43552074 | 20.036.414 | 0.0 | 2,08E+01 | 0.001 |
| GSE22886 | NAIVE_BCELL_VS_BM_PLASMA_CELL_UP                                            | 196 | 0.43441498 | 2.004.741  | 0.0 | 2,08E+01 | 0.001 |
| GSE33424 | CD161_INT_VS_NEG_CD8_TCELL_UP                                               | 193 | 0.43612736 | 20.052.826 | 0.0 | 2,08E+01 | 0.001 |
| GSE360   | T_GONDII_VS_B_MALAYI_HIGH_DOSE_MAC_DN                                       | 195 | 0.43461108 | 2.006.294  | 0.0 | 2,09E+01 | 0.001 |
| GSE21546 | UNSTIM_VS_ANTI_CD3_STIM_SAP1A_KO_AND_ELK1_KO_DP_THYMOCYTES_UP               | 165 | 0.44095117 | 20.063.362 | 0.0 | 2,09E+01 | 0.001 |
| GSE3982  | MAST_CELL_VS_EFF_MEMORY_CD4_TCELL_DN                                        | 188 | 0.4326962  | 20.066.915 | 0.0 | 2,10E+01 | 0.001 |

|          |                                                                             |     |            |           |             |          |       |
|----------|-----------------------------------------------------------------------------|-----|------------|-----------|-------------|----------|-------|
| GSE3982  | BCELL_VS_NKCELL_DN                                                          | 193 | 0.43407097 | 20.067844 | 0.0         | 2.10E+01 | 0.001 |
| GSE31082 | DN_VS_CD8_SP_THYMOCYTE_DN                                                   | 193 | 0.43733934 | 20.068285 | 0.0         | 2.11E+01 | 0.001 |
| GSE14000 | UNSTIM_VS_16H_LPS_DC_TRANSLATED_RNA_DN                                      | 186 | 0.44277528 | 20.0713   | 0.0         | 2.11E+01 | 0.001 |
| GSE36392 | EOSINOPHIL_VS_NEUTROPHIL_IL25_TREATED_LUNG_UP                               | 198 | 0.42839748 | 2.007389  | 0.0         | 2.12E+01 | 0.001 |
| GSE21360 | TERTIARY_VS_QUATERNARY_MEMORY_CD8_TCELL_UP                                  | 179 | 0.43793666 | 20.074646 | 0.0         | 2.12E+01 | 0.001 |
| GSE21379 | TFH_VS_NON_TFH_CD4_TCELL_DN                                                 | 190 | 0.37914854 | 17.381697 | 0.0         | 2.36E+01 | 0.188 |
| GSE21546 | UNSTIM_VS_ANTI_CD3_STIM_DP_THYMOCYTES_UP                                    | 183 | 0.39730918 | 18.370496 | 0.0         | 2.75E+01 | 0.02  |
| GSE30971 | WBP7_HET_VS_KO_MACROPHAGE_DN                                                | 187 | 0.37525806 | 17.242371 | 0.0         | 3.10E+01 | 0.244 |
| GSE24574 | BCL6_HIGH_VS_LOW_TFH_CD4_TCELL_UP                                           | 195 | 0.41224134 | 18.918245 | 0.0         | 3.14E+01 | 0.002 |
| GSE14415 | INDUCED_TREG_VS_TCONV_DN                                                    | 150 | 0.42103663 | 18.920145 | 0.0         | 3.14E+01 | 0.002 |
| GSE40443 | INDUCED_VS_TOTAL_TREG_DN                                                    | 191 | 0.41037923 | 18.934597 | 0.0         | 3.15E+01 | 0.002 |
| GSE7768  | OVA_ALONE_VS_OVA_WITH_LPS_IMMUNIZED_MOUSE_WHOLE_SPLEEN_6H_DN                | 164 | 0.4173323  | 18.936988 | 0.0         | 3.16E+01 | 0.002 |
| GSE21379 | WT_VS_SAP_KO_TFH_CD4_TCELL_UP                                               | 193 | 0.41167    | 1.893736  | 0.0         | 3.16E+01 | 0.002 |
| GSE29618 | BCELL_VS_PDC_DAY7_FLU_VACCINE_DN                                            | 193 | 0.40382645 | 18.954093 | 0.0         | 3.17E+01 | 0.002 |
| GSE46242 | CTRL_VS_EGR2_DELETED_ANERGIC_TH1_CD4_TCELL_DN                               | 186 | 0.40808058 | 18.967127 | 0.0         | 3.19E+01 | 0.002 |
| GSE33513 | TCF7_KO_VS_HET_EARLY_THYMIC_PROGENITOR_UP                                   | 189 | 0.41174778 | 18.980777 | 0.0         | 3.20E+01 | 0.002 |
| GSE7348  | UNSTIM_VS_LPS_STIM_MACROPHAGE_DN                                            | 165 | 0.42032197 | 18.989569 | 0.0         | 3.20E+01 | 0.002 |
| GSE42088 | UNINF_VS_LEISHMANIA_INF_DC_24H_UP                                           | 196 | 0.41381747 | 1.899646  | 0.0         | 3.21E+01 | 0.002 |
| GSE39556 | UNTREATED_VS_3H_POLYIC_INJ_MOUSE_NK_CELL_DN                                 | 195 | 0.41307387 | 18.997946 | 0.0         | 3.21E+01 | 0.002 |
| GSE33292 | DN3_THYMOCYTE_VS_TCF1_KO_TCELL_LYMPHOMA_UP                                  | 197 | 0.41036072 | 19.005971 | 0.0         | 3.22E+01 | 0.002 |
| GSE16385 | ROSIGLITAZONE_IL4_VS_IFNG_TNF_STIM_MACROPHAGE_UP                            | 193 | 0.40915248 | 19.006917 | 0.0         | 3.23E+01 | 0.002 |
| GSE15735 | CTRL_VS_HDAC_INHIBITOR_TREATED_CD4_TCELL_2H_UP                              | 195 | 0.41569978 | 19.041607 | 0.0         | 3.25E+01 | 0.002 |
| GSE26912 | TUMORICIDAL_VS_CTRL_MACROPHAGE_DN                                           | 194 | 0.4154815  | 1.904889  | 0.0         | 3.25E+01 | 0.002 |
| GSE22886 | NAIVE_TCELL_VS_DC_DN                                                        | 199 | 0.40745407 | 19.049037 | 0.0         | 3.26E+01 | 0.002 |
| GSE2770  | IL12_AND_TGFB_VS_IL4_TREATED_ACT_CD4_TCELL_6H_DN                            | 189 | 0.41429424 | 19.058683 | 0.0         | 3.26E+01 | 0.002 |
| GSE24671 | CTRL_VS_BAKIMULC_INFECTED_MOUSE_SPLENOCYTES_DN                              | 166 | 0.42131513 | 190.727   | 0.0         | 3.27E+01 | 0.002 |
| GSE24634 | IL4_VS_CTRL_TREATED_NAIVE_CD4_TCELL_DAY10_DN                                | 197 | 0.4163309  | 19.079162 | 0.0         | 3.28E+01 | 0.002 |
| GSE9509  | 10MIN_VS_30MIN_LPS_STIM_IL10_KO_MACROPHAGE_DN                               | 181 | 0.4186314  | 19.093637 | 0.0         | 3.28E+01 | 0.002 |
| GSE17974 | OH_VS_2H_IN_VITRO_ACT_CD4_TCELL_UP                                          | 178 | 0.41686195 | 1.910611  | 0.0         | 3.29E+01 | 0.002 |
| GSE19198 | 6H_VS_24H_IL21_TREATED_TCELL_DN                                             | 191 | 0.41638184 | 19.117069 | 0.0         | 3.30E+01 | 0.002 |
| GSE7568  | CTRL_VS_24H_TGFB_TREATED_MACROPHAGES_WITH_IL4_AND_DEXTAMETHASONE_UP         | 190 | 0.41501027 | 19.119345 | 0.0         | 3.30E+01 | 0.002 |
| GSE13484 | 12H_UNSTIM_VS_YF17D_VACCINE_STIM_PBMCDN                                     | 196 | 0.41275665 | 19.135605 | 0.0         | 3.33E+01 | 0.002 |
| GSE36476 | CTRL_VS_TSST_ACT_72H_MEMORY_CD4_TCELL_YOUNG_UP                              | 192 | 0.41495305 | 19.137416 | 0.0         | 3.33E+01 | 0.002 |
| GSE2585  | CTEC_VS_MTEC_THYMUS_DN                                                      | 192 | 0.40825024 | 19.138612 | 0.0         | 3.34E+01 | 0.002 |
| GSE15930 | STIM_VS_STIM_AND_IL12_48H_CD8_T_CELL_UP                                     | 197 | 0.41060805 | 19.142357 | 0.0         | 3.34E+01 | 0.002 |
| GSE37534 | UNTREATED_VS_ROSIGLITAZONE_TREATED_CD4_TCELL_PPARG1_AND_FOXP3_TRANSDUCED_DN | 191 | 0.4154509  | 19.144826 | 0.0         | 3.35E+01 | 0.002 |
| GSE1112  | HY_CD8AB_VS_HY_CD8AA_THYMOCYTE_RTOC_CULTURE_UP                              | 177 | 0.4236087  | 19.177016 | 0.0         | 3.36E+01 | 0.002 |
| GSE32901 | NAIVE_VS_TH17_NEG_CD4_TCELL_UP                                              | 167 | 0.40367022 | 18.283478 | 0.0         | 3.36E+01 | 0.025 |
| GSE3982  | EOSINOPHIL_VS_MAST_CELL_UP                                                  | 193 | 0.41391775 | 19.178245 | 0.0         | 3.37E+01 | 0.002 |
| GSE37301 | COMMON_LYMPHOID_PROGENITOR_VS_RAG2_KO_NK_CELL_DN                            | 190 | 0.39759445 | 18.250988 | 0.0         | 3.60E+01 | 0.027 |
| GSE28737 | BCL6_HET_VS_BCL6_KO_MARGINAL_ZONE_BCELL_UP                                  | 194 | 0.39701778 | 18.255174 | 0.0         | 3.61E+01 | 0.027 |
| GSE18804 | SPLEEN_MACROPHAGE_VS_COLON_TUMORAL_MACROPHAGE_UP                            | 198 | 0.39719886 | 1.827351  | 0.0         | 3.62E+01 | 0.027 |
| GSE3982  | DC_VS_EFF_MEMORY_CD4_TCELL_DN                                               | 189 | 0.39820513 | 18.212359 | 0.0         | 3.70E+01 | 0.028 |
| GSE9988  | ANTI_TREM1_AND_LPS_VS_CTRL_TREATED_MONOCYTES_DN                             | 189 | 0.38838002 | 1.821534  | 0.0         | 3.71E+01 | 0.028 |
| GSE40274 | CTRL_VS_EOS_TRANSDUCED_ACTIVATED_CD4_TCELL_DN                               | 142 | 0.4110758  | 18.194631 | 0.0         | 3.95E+01 | 0.03  |
| GSE30962 | ACUTE_VS_CHRONIC_LCMV_SECONDARY_INF_CD8_TCELL_UP                            | 196 | 0.39121118 | 18.159212 | 0.0         | 4.07E+01 | 0.031 |
| GSE17974 | IL4_AND_ANTI_IL12_VS_UNTREATED_48H_ACT_CD4_TCELL_UP                         | 173 | 0.39925566 | 1.817881  | 0.0         | 4.08E+01 | 0.031 |
| GSE3039  | NKT_CELL_VS_B1_BCELL_UP                                                     | 187 | 0.38758373 | 18.127377 | 0.0         | 4.31E+01 | 0.033 |
| GSE360   | L_DONOVANI_VS_B_MALAYI_HIGH_DOSE_DC_UP                                      | 192 | 0.41242    | 18.891457 | 0.0         | 4.70E+01 | 0.003 |
| GSE46606 | IRF4_KO_VS_WT_UNSTIM_BCELL_DN                                               | 193 | 0.4096584  | 18.902235 | 0.0         | 4.73E+01 | 0.003 |
| GSE13738 | TCR_VS_BYSTANDER_ACTIVATED_CD4_TCELL_DN                                     | 184 | 0.3725237  | 16.984469 | 0.001340482 | 4.78E+01 | 0.364 |
| GSE5503  | MLN_DC_VS_SPLEEN_DC_ACTIVATED_ALLOGENIC_TCELL_UP                            | 194 | 0.3931476  | 18.099841 | 0.0         | 4.82E+01 | 0.036 |
| GSE12003 | MIR223_KO_VS_WT_BM_PROGENITOR_8D_CULTURE_UP                                 | 119 | 0.41251704 | 18.092242 | 0.0         | 5.07E+01 | 0.038 |
| GSE37605 | TREG_VS_TCONV_C57BL6_FOXP3_FUSION_GFP_UP                                    | 127 | 0.4076433  | 18.083084 | 0.0         | 5.17E+01 | 0.039 |
| GSE9988  | LOW_LPS_VS_VEHICLE_TREATED_MONOCYTE_UP                                      | 177 | 0.37140265 | 16.935322 | 0.0         | 5.23E+01 | 0.4   |
| GSE28737 | WT_VS_BCL6_HET_FOLLICULAR_BCELL_DN                                          | 188 | 0.38906762 | 18.039572 | 0.0         | 5.41E+01 | 0.04  |
| GSE360   | DC_VS_MAC_T_GONDII_DN                                                       | 196 | 0.3876068  | 1.799871  | 0.0         | 5.73E+01 | 0.042 |
| GSE18281 | SUBCAPSULAR_VS_PERIMEDULLARY_CORTICAL_REGION_OF_THYMUS_UP                   | 195 | 0.391984   | 18.002845 | 0.0         | 5.74E+01 | 0.042 |
| GSE40273 | XBP1_KO_VS_WT_TREG_DN                                                       | 190 | 0.38913897 | 17.986329 | 0.0         | 5.83E+01 | 0.043 |
| GSE22886 | NAIVE_BCELL_VS_MONOCYTE_UP                                                  | 187 | 0.40698507 | 18.783131 | 0.0         | 6.10E+01 | 0.004 |
| GSE11961 | GERMINAL_CENTER_BCELL_DAY7_VS_MEMORY_BCELL_DAY40_DN                         | 195 | 0.40914166 | 18.790833 | 0.0         | 6.12E+01 | 0.004 |
| GSE15271 | CXCR4_POS_VS_NEG_GC_BCELL_DN                                                | 165 | 0.41151655 | 18.790942 | 0.0         | 6.13E+01 | 0.004 |
| GSE40274 | CTRL_VS_SATB1_TRANSDUCED_ACTIVATED_CD4_TCELL_UP                             | 163 | 0.4141588  | 18.811395 | 0.0         | 6.15E+01 | 0.004 |
| GSE21774 | CD62L_POS_CD56_DIM_VS_CD62L_NEG_CD56_DIM_NK_CELL_DN                         | 194 | 0.41040397 | 18.818407 | 0.0         | 6.16E+01 | 0.004 |
| GSE2770  | IL12_VS_TGFB_AND_IL12_TREATED_ACT_CD4_TCELL_48H_UP                          | 194 | 0.40855718 | 18.853736 | 0.0         | 6.20E+01 | 0.004 |
| GSE40274 | CTRL_VS_HELIOS_TRANSDUCED_ACTIVATED_CD4_TCELL_UP                            | 155 | 0.424041   | 188.633   | 0.0         | 6.21E+01 | 0.004 |
| GSE40274 | CTRL_VS_FOXP3_AND_PBX1_TRANSDUCED_ACTIVATED_CD4_TCELL_UP                    | 154 | 0.41971213 | 18.866339 | 0.0         | 6.22E+01 | 0.004 |
| GSE7831  | UNSTIM_VS_INFLUENZA_STIM_PDC_4H_UP                                          | 196 | 0.41144916 | 18.867564 | 0.0         | 6.23E+01 | 0.004 |
| GSE32255 | UNSTIM_VS_4H_LPS_STIM_DC_UP                                                 | 175 | 0.41546306 | 18.879768 | 0.0         | 6.24E+01 | 0.004 |
| GSE16451 | CTRL_VS_WEST_EQUINE_ENC_VIRUS_MATURE_NEURON_CELL_LINE_DN                    | 195 | 0.40547007 | 18.882251 | 0.0         | 6.25E+01 | 0.004 |
| GSE2706  | UNSTIM_VS_8H_LPS_DC_DN                                                      | 190 | 0.40922752 | 1.888957  | 0.0         | 6.26E+01 | 0.004 |
| GSE32986 | CURDLAN_LOWDOSE_VS_CURDLAN_HIGHDOSE_STIM_DC_UP                              | 190 | 0.3871596  | 17.944547 | 0.0         | 6.39E+01 | 0.048 |
| GSE3720  | LPS_VS_PMA_STIM_VD2_GAMMADELTA_TCELL_UP                                     | 131 | 0.40816855 | 17.942477 | 0.0         | 6.51E+01 | 0.049 |
| GSE11961 | UNSTIM_VS_ANTI_IGM_AND_CD40_STIM_6H_FOLLICULAR_BCELL_DN                     | 191 | 0.38868776 | 17.933682 | 0.0         | 6.59E+01 | 0.05  |
| GSE17580 | TREG_VS_TEFF_S_MANSONI_INF_DN                                               | 191 | 0.3878832  | 17.935368 | 0.0         | 6.60E+01 | 0.05  |
| GSE17721 | PAM3CSK4_VS_GADIQUIMOD_12H_BMDM_DN                                          | 197 | 0.3882853  | 17.935563 | 0.0         | 6.61E+01 | 0.05  |
| GSE1448  | CTRL_VS_ANTI_VBETA5_DP_THYMOCYTE_DN                                         | 197 | 0.38957995 | 17.923374 | 0.0         | 6.82E+01 | 0.052 |
| GSE13306 | TREG_VS_TCONV_SPLEEN_DN                                                     | 191 | 0.3861509  | 17.911904 | 0.0         | 6.92E+01 | 0.053 |
| GSE4590  | SMALL_VS_LARGE_PRE_BCELL_DN                                                 | 153 | 0.39499208 | 17.892321 | 0.0         | 7.00E+01 | 0.054 |
| GSE16266 | CTRL_VS_LPS_STIM_MEF_DN                                                     | 194 | 0.38232198 | 17.892641 | 0.0         | 7.01E+01 | 0.054 |
| GSE37605 | C57BL6_VS_NOD_FOXP3_IRES_GFP_TREG_DN                                        | 194 | 0.38903505 | 17.893564 | 0.0         | 7.02E+01 | 0.054 |
| GSE360   | L_DONOVANI_VS_B_MALAYI_LOW_DOSE_DC_DN                                       | 199 | 0.385123   | 17.895446 | 0.0         | 7.03E+01 | 0.054 |
| GSE20366 | TREG_VS_NAIVE_CD4_TCELL_DEC205_CONVERSION_UP                                | 195 | 0.39123937 | 17.896918 | 0.0         | 7.03E+01 | 0.054 |
| GSE17974 | IL4_AND_ANTI_IL12_VS_UNTREATED_24H_ACT_CD4_TCELL_UP                         | 161 | 0.3709907  | 16.746324 | 0.0         | 7.11E+01 | 0.515 |
| GSE24142 | DN2_VS_DN3_THYMOCYTE_UP                                                     | 198 | 0.3830064  | 17.880954 | 0.0         | 7.23E+01 | 0.055 |
| GSE22935 | UNSTIM_VS_24H_MBOVIS_BCG_STIM_MYD88_KO_MACROPHAGE_DN                        | 188 | 0.3636487  | 16.739278 | 0.0         | 7.25E+01 | 0.524 |
| GSE17974 | IL4_AND_ANTI_IL12_VS_UNTREATED_2H_ACT_CD4_TCELL_UP                          | 173 | 0.40646192 | 1.865627  | 0.0         | 7.41E+01 | 0.005 |
| GSE360   | CTRL_VS_T_GONDII_DC_DN                                                      | 192 | 0.40473494 | 18.665292 | 0.0         | 7.45E+01 | 0.005 |
| GSE17974 | OH_VS_72H_IN_VITRO_ACT_CD4_TCELL_UP                                         | 179 | 0.40452242 | 18.687172 | 0.0         | 7.48E+01 | 0.005 |

|                                                                                      |     |            |            |             |          |       |
|--------------------------------------------------------------------------------------|-----|------------|------------|-------------|----------|-------|
| GSE36476_CTRL_VS_TSST_ACT_40H_MEMORY_CD4_TCELL_YOUNG_UP                              | 187 | 0.40660182 | 18.706.768 | 0.0         | 7.50E+01 | 0.005 |
| GSE1740_UNSTIM_VS_IFNA_STIMULATED_MCSF_IFNG_DERIVED_MACROPHAGE_UP                    | 171 | 0.40624344 | 18.740.413 | 0.0         | 7.55E+01 | 0.005 |
| GSE2128_CTRL_VS_MIMETOPE_NEGATIVE_SELECTION_DP_THYMOCYTE_NOD_DN                      | 177 | 0.41494626 | 18.755.798 | 0.0         | 7.58E+01 | 0.005 |
| GSE21670_UNTREATED_VS_IL6_TREATED_CD4_TCELL_DN                                       | 196 | 0.40809125 | 18.773.755 | 0.0         | 7.60E+01 | 0.005 |
| GSE29949_CD8_POS_DC_SPLEEN_VS_MONOCYTE_BONE_MARROW_UP                                | 194 | 0.40703437 | 18.774.496 | 0.0         | 7.61E+01 | 0.005 |
| GSE21380_NON_TFH_VS_TFH_CD4_TCELL_DN                                                 | 196 | 0.389787   | 17.866.893 | 0.0         | 7.70E+01 | 0.058 |
| GSE32986_UNSTIM_VS_GMCSF_STIM_DC_UP                                                  | 184 | 0.39069617 | 17.868.816 | 0.0         | 7.71E+01 | 0.058 |
| GSE5099_DAY3_VS_DAY7_MCSF_TREATED_MACROPHAGE_UP                                      | 183 | 0.38934878 | 17.868.837 | 0.0         | 7.72E+01 | 0.058 |
| GSE3982_DC_VS_NKCELL_DN                                                              | 188 | 0.38984242 | 17.849.835 | 0.0         | 8.53E+01 | 0.065 |
| GSE37416_CTRL_VS_24H_F_TULARENSIS_LVS_NEUTROPHIL_UP                                  | 184 | 0.38616955 | 17.834.114 | 0.0         | 8.77E+01 | 0.067 |
| GSE11057_EFF_MEM_VS_CENT_MEM_CD4_TCELL_UP                                            | 187 | 0.38499406 | 17.796.955 | 0.0         | 9.29E+01 | 0.072 |
| GSE15624_3H_VS_6H_HALOFUGINONE_TREATED_CD4_TCELL_UP                                  | 162 | 0.39453462 | 17.797.183 | 0.0         | 9.30E+01 | 0.072 |
| GSE12845_IGD_NEG_BLOOD_VS_DARKZONE_GC_TONSIL_BCELL_UP                                | 189 | 0.38368878 | 17.805.605 | 0.0         | 9.31E+01 | 0.072 |
| GSE22886_DAY0_VS_DAY1_MONOCYTE_IN_CULTURE_DN                                         | 194 | 0.36316678 | 16.590.568 | 0.0         | 9.41E+01 | 0.627 |
| GSE37301_COMMON_LYMPHOID_PROGENITOR_VS_GRAN_MONO_PROGENITOR_DN                       | 186 | 0.38797235 | 17.774.493 | 0.0         | 9.73E+01 | 0.076 |
| GSE22886_NEUTROPHIL_VS_DC_UP                                                         | 190 | 0.3628514  | 16.554.921 | 0.0         | 9.90E+01 | 0.648 |
| GSE12845_IGD_POS_VS_NEG_BLOOD_BCELL_UP                                               | 189 | 0.38459408 | 17.752.513 | 0.0         | 1.09E+02 | 0.084 |
| GSE24142_EARLY_THYMIC_PROGENITOR_VS_DN3_THYMOCYTE_DN                                 | 193 | 0.40331826 | 18.578.631 | 0.0         | 1.32E+02 | 0.009 |
| GSE3982_EOSINOPHIL_VS_CENT_MEMORY_CD4_TCELL_UP                                       | 191 | 0.38658434 | 17.680.483 | 0.0         | 1.33E+02 | 0.104 |
| GSE24292_WT_VS_PPARG_KO_MACROPHAGE_DN                                                | 194 | 0.38058335 | 17.639.289 | 0.0         | 1.50E+02 | 0.115 |
| GSE22140_GERMFREE_VS_SPF_ARTHRITIC_MOUSE_CD4_TCELL_UP                                | 195 | 0.38018793 | 17.618.979 | 0.0         | 1.53E+02 | 0.118 |
| GSE12392_WT_VS_IFNB_KO_CD8A_POS_SPLEEN_DC_DN                                         | 193 | 0.38524133 | 17.619.381 | 0.0         | 1.53E+02 | 0.118 |
| GSE7764_IL15_TREATED_VS_CTRL_NK_CELLS_24H_DN                                         | 190 | 0.39976987 | 18.47.968  | 0.0         | 1.57E+02 | 0.011 |
| GSE20715_WT_VS_TLR4_KO_48H_OZONE_LUNG_UP                                             | 198 | 0.40027538 | 18.480.451 | 0.0         | 1.58E+02 | 0.011 |
| GSE3982_MAST_CELL_VS_BASOPHIL_DN                                                     | 188 | 0.4007428  | 18.483.107 | 0.0         | 1.58E+02 | 0.011 |
| GSE7460_FOXP3_MUT_VS_WT_ACT_TCONV_UP                                                 | 191 | 0.4049793  | 18.485.389 | 0.0         | 1.58E+02 | 0.011 |
| GSE7460_CTRL_VS_FOXP3_OVEREXPR_TCONV_1_DN                                            | 191 | 0.40238923 | 18.491.977 | 0.0         | 1.58E+02 | 0.011 |
| GSE27241_CTRL_VS_DIGOXIN_TREATED_CD4_TCELL_IN_TH17_POLARIZING_CONDITIONS_UP          | 156 | 0.40801817 | 18.504.993 | 0.0         | 1.59E+02 | 0.011 |
| GSE3039_ALPHAALPHA_CD8_TCELL_VS_B2_BCELL_UP                                          | 194 | 0.4000333  | 18.518.405 | 0.0         | 1.59E+02 | 0.011 |
| GSE22589_HEALTHY_VS_SIV_INFECTED_DC_DN                                               | 193 | 0.401356   | 18.518.703 | 0.0         | 1.59E+02 | 0.011 |
| GSE14769_UNSTIM_VS_60MIN_LPS_BMDM_DN                                                 | 189 | 0.39931214 | 18.520.596 | 0.0         | 1.59E+02 | 0.011 |
| GSE29618_PDC_VS_MDC_DAY7_FLU_VACCINE_UP                                              | 192 | 0.4058667  | 1.852.615  | 0.0         | 1.59E+02 | 0.011 |
| GSE45365_CD8A_DC_VS_CD11B_DC_IFNAR_KO_MCMV_INFECTION_DN                              | 158 | 0.41044626 | 18.532.572 | 0.0         | 1.60E+02 | 0.011 |
| GSE6090_UNSTIM_VS_DC-SIGN_STIM_DC_DN                                                 | 140 | 0.42218095 | 18.533.862 | 0.0         | 1.60E+02 | 0.011 |
| GSE16385_ROSIGLITAZONE_IL4_VS_IFNG_TNF_STIM_MACROPHAGE_DN                            | 189 | 0.40343094 | 18.536.248 | 0.0         | 1.60E+02 | 0.011 |
| GSE3337_CTRL_VS_4H_IFNG_IN_CD8POS_DC_DN                                              | 197 | 0.40018466 | 185.392    | 0.0         | 1.60E+02 | 0.011 |
| GSE12366_NAIVE_VS_MEMORY_BCELL_UP                                                    | 174 | 0.4062176  | 18.540.922 | 0.0         | 1.61E+02 | 0.011 |
| GSE21360_SECONDARY_VS_TERTIARY_MEMORY_CD8_TCELL_DN                                   | 157 | 0.41273162 | 18.552.028 | 0.0         | 1.61E+02 | 0.011 |
| GSE24142_ADULT_VS_FETAL_DN2_THYMOCYTE_UP                                             | 195 | 0.40051857 | 18.562.088 | 0.0         | 1.62E+02 | 0.011 |
| GSE22025_TGFB1_VS_TGFB1_AND_PROGESTERONE_TREATED_CD4_TCELL_UP                        | 193 | 0.40164405 | 18.563.709 | 0.0         | 1.62E+02 | 0.011 |
| GSE2770_IL4_ACT_VS_ACT_CD4_TCELL_48H_DN                                              | 192 | 0.37929553 | 17.587.489 | 0.0         | 1.62E+02 | 0.125 |
| GSE8621_UNSTIM_VS_LPS_PRIMED_AND_LPS_STIM_MACROPHAGE_DN                              | 190 | 0.40205935 | 18.461.432 | 0.0         | 1.71E+02 | 0.012 |
| GSE10239_NAIVE_VS_MEMORY_CD8_TCELL_DN                                                | 190 | 0.40243614 | 18.464.946 | 0.0         | 1.71E+02 | 0.012 |
| GSE19198_CTRL_VS_IL21_TREATED_TCELL_24H_DN                                           | 193 | 0.4032116  | 18.473.572 | 0.0         | 1.71E+02 | 0.012 |
| GSE34006_WT_VS_A2AR_KO_TREG_DN                                                       | 194 | 0.40027386 | 18.475.587 | 0.0         | 1.71E+02 | 0.012 |
| GSE35543_IN_VIVO_NTREG_VS_IN_VITRO_ITREG_DN                                          | 161 | 0.38962898 | 17.565.705 | 0.0         | 1.72E+02 | 0.131 |
| GSE36888_UNTREATED_VS_IL2_TREATED_STAT5_AB_KNOCKIN_TCELL_17H_UP                      | 178 | 0.3965576  | 18.422.282 | 0.0         | 1.82E+02 | 0.013 |
| GSE25085_FETAL_LIVER_VS_FETAL_BM_SP4_THYMIC_IMPLANT_DN                               | 190 | 0.40377626 | 1.842.794  | 0.0         | 1.83E+02 | 0.013 |
| GSE3982_MEMORY_CD4_TCELL_VS_TH2_UP                                                   | 183 | 0.40525806 | 18.429.345 | 0.0         | 1.83E+02 | 0.013 |
| GSE13522_CTRL_VS_T_CRUZI_Y_STRAIN_INF_SKIN_BALBC_MOUSE_DN                            | 126 | 0.42453095 | 18.437.766 | 0.0         | 1.84E+02 | 0.013 |
| GSE9988_ANTI_TREM1_VS_LPS_MONOCYTE_UP                                                | 188 | 0.40119192 | 18.437.893 | 0.0         | 1.84E+02 | 0.013 |
| GSE2706_R848_VS_R848_AND_LPS_8H_STIM_DC_UP                                           | 171 | 0.4025076  | 18.443.271 | 0.0         | 1.84E+02 | 0.013 |
| GSE5455_HEALTHY_VS_TUMOR_BEARING_MOUSE_SPLEEN_MONOCYTE_24H_INCUBATION_DN             | 192 | 0.4026593  | 18.451.711 | 0.0         | 1.84E+02 | 0.013 |
| GSE360_HIGH_DOSE_B_MALAYI_VS_M_TUBERCULOSIS_MAC_DN                                   | 193 | 0.4014485  | 18.453.965 | 0.0         | 1.85E+02 | 0.013 |
| GSE10856_CTRL_VS_TNFRSF6B_IN_MACROPHAGE_UP                                           | 178 | 0.38092718 | 17.496.129 | 0.0         | 1.90E+02 | 0.15  |
| GSE39110_UNTREATED_VS_IL2_TREATED_CD8_TCELL_DAY6_POST_IMMUNIZATION_DN                | 197 | 0.37927148 | 17.490.473 | 0.0         | 1.93E+02 | 0.153 |
| GSE34006_A2AR_KO_VS_A2AR_AGONIST_TREATED_TREG_UP                                     | 196 | 0.4024432  | 18.407.835 | 0.0         | 1.94E+02 | 0.014 |
| GSE5589_IL6_KO_VS_IL10_KO_LPS_AND_IL10_STIM_MACROPHAGE_45MIN_UP                      | 193 | 0.39814484 | 18.408.304 | 0.0         | 1.95E+02 | 0.014 |
| GSE28726_ACT_CD4_TCELL_VS_ACT_VA24NEG_NKTCCELL_DN                                    | 195 | 0.39860156 | 18.409.193 | 0.0         | 1.95E+02 | 0.014 |
| GSE16522_MEMORY_VS_NAIVE_ANTI_CD3CD28_STIM_CD8_TCELL_DN                              | 197 | 0.39899597 | 18.410.258 | 0.0         | 1.95E+02 | 0.014 |
| GSE33425_CD161_INT_VS_NEG_CD8_TCELL_DN                                               | 196 | 0.398903   | 18.410.654 | 0.0         | 1.96E+02 | 0.014 |
| GSE360_T_GONDII_VS_B_MALAYI_HIGH_DOSE_DC_DN                                          | 196 | 0.39940992 | 18.418.264 | 0.0         | 1.96E+02 | 0.014 |
| GSE4748_CTRL_VS_CYANOBACTERIUM_LPSLIKE_STIM_DC_3H_UP                                 | 192 | 0.3956057  | 18.419.403 | 0.0         | 1.96E+02 | 0.014 |
| GSE26343_WT_VS_NFATS_KO_MACROPHAGE_DN                                                | 199 | 0.37638524 | 17.469.581 | 0.0         | 2.02E+02 | 0.159 |
| GSE23502_BM_VS_COLON_TUMOR_HDC_KO_MYELOID_DERIVED_SUPPRESSOR_CELL_UP                 | 193 | 0.37953714 | 17.415.439 | 0.0         | 2.16E+02 | 0.169 |
| GSE10147_IL3_VS_IL3_AND_CPG_STIM_PDC_UP                                              | 137 | 0.3989976  | 17.403.111 | 0.0         | 2.28E+02 | 0.18  |
| GSE29164_DAY3_VS_DAY7_UNTREATED_MELANOMA_UP                                          | 180 | 0.37744004 | 17.388.421 | 0.0         | 2.36E+02 | 0.188 |
| GSE19923_WT_VS_HEB_KO_DP_THYMOCYTE_UP                                                | 196 | 0.37358236 | 17.363.695 | 0.0         | 2.47E+02 | 0.194 |
| GSE3982_BCELL_VS_EFF_MEMORY_CD4_TCELL_DN                                             | 190 | 0.39851007 | 1.838.513  | 0.0         | 2.49E+02 | 0.018 |
| GSE43863_DAY6_EFF_VS_DAY150_MEM_TFH_CD4_TCELL_DN                                     | 194 | 0.39978608 | 1.838.585  | 0.0         | 2.49E+02 | 0.018 |
| GSE2706_UNSTIM_VS_8H_LPS_AND_R848_DC_DN                                              | 186 | 0.377867   | 17.353.985 | 0.0         | 2.49E+02 | 0.196 |
| GSE43863_NAIVE_VS_TFH_CD4_EFF_TCELL_D6_LCMV_DN                                       | 156 | 0.40959492 | 18.388.261 | 0.0         | 2.49E+02 | 0.018 |
| GSE36476_YOUNG_VS_OLD_DONOR_MEMORY_CD4_TCELL_72H_TSST_ACT_DN                         | 187 | 0.37686792 | 1.734.995  | 0.0         | 2.51E+02 | 0.198 |
| GSE32034_LY6C_HIGH_VS_LOW_MONOCYTE_UP                                                | 195 | 0.37685287 | 17.346.034 | 0.0         | 2.52E+02 | 0.199 |
| GSE7568_IL4_TGFB_DEXAMETHASONE_VS_IL4_TGFB_TREATED_MACROPHAGE_DN                     | 172 | 0.38006386 | 17.337.315 | 0.0         | 2.55E+02 | 0.201 |
| GSE3982_EOSINOPHIL_VS_DC_UP                                                          | 193 | 0.37563026 | 17.318.959 | 0.0         | 2.63E+02 | 0.209 |
| GSE3982_EFF_MEMORY_VS_CENT_MEMORY_CD4_TCELL_UP                                       | 190 | 0.3744451  | 1.731.749  | 0.0         | 2.65E+02 | 0.209 |
| GSE32423_IL7_VS_IL7_IL4_NAIVE_CD8_TCELL_UP                                           | 192 | 0.39983448 | 18.367.277 | 0.0         | 2.74E+02 | 0.02  |
| GSE27241_CTRL_VS_DIGOXIN_TREATED_RORGT_KO_CD4_TCELL_IN_TH17_POLARIZING_CONDITIONS_DN | 172 | 0.40570986 | 1.836.911  | 0.0         | 2.74E+02 | 0.02  |
| GSE36392_TYPE_2_MYELOID_VS_NEUTROPHIL_IL25_TREATED_LUNG_UP                           | 195 | 0.4002888  | 18.369.595 | 0.0         | 2.75E+02 | 0.02  |
| GSE11961_FOLLICULAR_BCELL_VS_MARGINAL_ZONE_BCELL_UP                                  | 192 | 0.39691123 | 18.373.008 | 0.001300390 | 2.75E+02 | 0.02  |
| GSE22282_HYPOXIA_VS_NORMOXIA_MYELOID_DC_DN                                           | 185 | 0.3984     | 18.373.449 | 0.0         | 2.76E+02 | 0.02  |
| GSE15330_HSC_VS_MEGAKARYOCYTE_ERYTHROID_PROGENITOR_UP                                | 159 | 0.38138995 | 17.297.447 | 0.002659574 | 2.76E+02 | 0.217 |
| GSE40273_GATA1_KO_VS_WT_TREG_DN                                                      | 194 | 0.39984292 | 18.380.053 | 0.0         | 2.76E+02 | 0.02  |
| GSE22601_IMMATURE_CD4_SINGLE_POSITIVE_VS_DOUBLE_POSITIVE_THYMOCYTE_UP                | 170 | 0.38482794 | 17.286.311 | 0.0         | 2.81E+02 | 0.219 |
| GSE45365_HEALTHY_VS_MCMV_INFECTION_CD8A_DC_DN                                        | 196 | 0.39657375 | 1.831.988  | 0.0         | 2.83E+02 | 0.021 |
| GSE4984_UNTREATED_VS_GALECTIN1_TREATED_DC_UP                                         | 180 | 0.39927304 | 18.320.237 | 0.0         | 2.84E+02 | 0.021 |
| GSE10422_WT_VS_BAFF_TRANSGENIC_LN_BCELL_DN                                           | 124 | 0.42059642 | 18.322.365 | 0.0         | 2.84E+02 | 0.021 |
| GSE3982_BASOPHIL_VS_TH2_UP                                                           | 189 | 0.39884087 | 18.323.574 | 0.0         | 2.84E+02 | 0.021 |

|                                                                       |     |            |            |             |          |       |
|-----------------------------------------------------------------------|-----|------------|------------|-------------|----------|-------|
| GSE36527_CD62L_HIGH_VS_CD62L_LOW_TREG_CD69_NEG_KLRG1_NEG_UP           | 196 | 0.39037532 | 1.833.184  | 0.0         | 2,85E+02 | 0.021 |
| GSE15735_CTRL_VS_HDAC_INHIBITOR_TREATED_CD4_TCELL_12H_DN              | 193 | 0.39809832 | 18.333.462 | 0.0         | 2,85E+02 | 0.021 |
| GSE35685_CD34POS_CD10NEG_CD62LPOS_VS_CD34POS_CD10POS_BONE_MARROW_DN   | 198 | 0.39660022 | 18.343.211 | 0.0         | 2,86E+02 | 0.021 |
| GSE30083_SP2_VS_SP3_THYMOCYTE_UP                                      | 199 | 0.39646816 | 18.349.006 | 0.0         | 2,86E+02 | 0.021 |
| GSE5455_HEALTHY_VS_TUMOR_BEARING_MOUSE_SPLEEN_MONOCYTE_UP             | 183 | 0.3997832  | 18.350.171 | 0.0         | 2,86E+02 | 0.021 |
| GSE25088_WT_VS_STAT6_KO_MACROPHAGE_ROSIGLITAZONE_AND_IL4_STIM_DN      | 182 | 0.40356734 | 18.350.387 | 0.0         | 2,87E+02 | 0.021 |
| GSE2706_R848_VS_LPS_8H_STIM_DC_DN                                     | 181 | 0.3987216  | 18.353.754 | 0.0         | 2,87E+02 | 0.021 |
| GSE46606_DAY1_VS_DAY3_CD40L_IL2_IL5_STIMULATED_IRF4HIGH_BCELL_DN      | 191 | 0.3749251  | 17.263.432 | 0.0         | 2,94E+02 | 0.23  |
| GSE40666_UNTREATED_VS_IFNA_STIM_EFFECTOR_CD8_TCELL_90MIN_UP           | 186 | 0.37802076 | 17.248.895 | 0.0         | 3,04E+02 | 0.238 |
| GSE43955_1H_VS_10H_ACT_CD4_TCELL_WITH_TGFB_IL6_DN                     | 194 | 0.39385408 | 18.313.569 | 0.0         | 3,10E+02 | 0.023 |
| GSE46606_IRF4MID_VS_WT_CD40L_IL2_IL5_DAY1_STIMULATED_BCELL_DN         | 189 | 0.3726539  | 17.235.444 | 0.0         | 3,17E+02 | 0.251 |
| GSE29949_MICROGLIA_BRAIN_VS_CD8_POS_DC_SPLEEN_UP                      | 196 | 0.37302157 | 17.229.042 | 0.001335113 | 3,21E+02 | 0.256 |
| GSE19401_PAM2CSK4_VS_RETINOIC_ACID_AND_PAM2CSK4_STIM_FOLLICULAR_DC_DN | 196 | 0.37014383 | 17.223.041 | 0.0         | 3,24E+02 | 0.258 |
| GSE32255_UNSTIM_VS_4H_LPS_STIM_DC_DN                                  | 148 | 0.38395572 | 17.208.481 | 0.001333333 | 3,34E+02 | 0.264 |
| GSE10239_NAIVE_VS_KLRG1HIGH_EFF_CD8_TCELL_UP                          | 193 | 0.37151504 | 17.195.024 | 0.0         | 3,37E+02 | 0.267 |
| GSE3982_NEUTROPHIL_VS_TH2_UP                                          | 198 | 0.36623248 | 17.183.813 | 0.0         | 3,44E+02 | 0.271 |
| GSE22886_IGM_MEMORY_BCELL_VS_BM_PLASMA_CELL_UP                        | 190 | 0.39735243 | 18.275.188 | 0.0         | 3,49E+02 | 0.026 |
| GSE26669_CTRL_VS_COSTIM_BLOCK_MLR_CD8_TCELL_DN                        | 195 | 0.3712413  | 1.717.059  | 0.0         | 3,52E+02 | 0.277 |
| GSE14415_ACT_TCONV_VS_ACT_NATURAL_TREG_DN                             | 174 | 0.37078044 | 17.157.172 | 0.0         | 3,55E+02 | 0.282 |
| GSE37301_HEMATOPOIETIC_STEM_CELL_VS_GRAN_MONO_PROGENITOR_DN           | 173 | 0.37577775 | 17.157.389 | 0.0         | 3,56E+02 | 0.282 |
| GSE44732_UNSTIM_VS_IL27_STIM_IMATURE_DC_DN                            | 188 | 0.3725212  | 17.152.276 | 0.0         | 3,58E+02 | 0.283 |
| GSE43863_DAY6_EFF_VS_DAY150_MEM_LY6C_INT_CXCR5POS_CD4_TCELL_UP        | 193 | 0.39598468 | 18.230.399 | 0.0         | 3,58E+02 | 0.027 |
| GSE3982_MAST_CELL_VS_NEUTROPHIL_DN                                    | 195 | 0.39224082 | 1.823.843  | 0.0         | 3,59E+02 | 0.027 |
| GSE34205_HEALTHY_VS_RSV_INF_INFANT_PBMC_UP                            | 182 | 0.3925662  | 1.824.826  | 0.0         | 3,59E+02 | 0.027 |
| GSE37301_CD4_TCELL_VS_GRANULOCYTE_MONOCYTE_PROGENITOR_UP              | 160 | 0.406411   | 18.251.033 | 0.0         | 3,60E+02 | 0.027 |
| GSE36078_WT_VS_IL1R_KO_LUNG_DC_DN                                     | 191 | 0.3969326  | 18.261.787 | 0.0         | 3,62E+02 | 0.027 |
| GSE33425_CD161_HIGH_VS_INT_CD8_TCELL_UP                               | 195 | 0.3979447  | 18.224.698 | 0.0         | 3,71E+02 | 0.028 |
| GSE25085_FETAL_BM_VS_ADULT_BM_SP4_THYMIC_IMPLANT_UP                   | 193 | 0.37026322 | 17.125.714 | 0.0         | 3,79E+02 | 0.296 |
| GSE15330_WT_VS_IKAROS_KO_GRANULOCYTE_MONOCYTE_PROGENITOR_DN           | 192 | 0.39322877 | 18.206.401 | 0.0         | 3,96E+02 | 0.03  |
| GSE26727_WT_VS_KLF2_KO_LPS_STIM_MACROPHAGE_UP                         | 196 | 0.3670949  | 17.097.378 | 0.0         | 3,96E+02 | 0.305 |
| GSE40274_FOXP3_VS_FOXP3_AND_IRF4_TRANSDUCE_ACTIVATED_CD4_TCELL_UP     | 195 | 0.3953724  | 18.153.955 | 0.0         | 4,05E+02 | 0.031 |
| GSE30971_WBP7_HET_VS_KO_MACROPHAGE_2H_LPS_STIM_DN                     | 188 | 0.3945163  | 18.155.166 | 0.0         | 4,06E+02 | 0.031 |
| GSE21546_UNSTIM_VS_ANTI_CD3_STIM_SAP1A_KO_DP_THYMOCYTES_UP            | 183 | 0.39574814 | 18.156.042 | 0.0         | 4,06E+02 | 0.031 |
| GSE37416_12H_VS_48H_F_TULARENSIS_LVS_NEUTROPHIL_UP                    | 191 | 0.39425868 | 18.179.432 | 0.0         | 4,08E+02 | 0.031 |
| GSE39820_CTRL_VS_IL1B_IL6_CD4_TCELL_DN                                | 190 | 0.3694792  | 17.038.395 | 0.0         | 4,38E+02 | 0.337 |
| GSE8921_UNSTIM_OH_VS_TLR1_2_STIM_MONOCYTE_6H_DN                       | 193 | 0.3692605  | 17.030.466 | 0.0         | 4,42E+02 | 0.34  |
| GSE36888_UNTREATED_VS_IL2_TREATED_STAT5_AB_KNOCKIN_TCELL_2H_DN        | 191 | 0.37114626 | 17.030.566 | 0.0         | 4,42E+02 | 0.34  |
| GSE43863_TH1_VS_TFH_EFFECTOR_CD4_TCELL_DN                             | 192 | 0.36524624 | 17.003.508 | 0.0         | 4,65E+02 | 0.356 |
| GSE26343_WT_VS_NFAT5_KO_MACROPHAGE_LPS_STIM_DN                        | 191 | 0.37070057 | 16.987.334 | 0.0         | 4,75E+02 | 0.363 |
| GSE41176_UNSTIM_VS_ANTI_IGM_STIM_TAK1_KO_BCELL_24H_DN                 | 194 | 0.3889973  | 18.099.629 | 0.0         | 4,82E+02 | 0.036 |
| GSE43863_NAIVE_VS_TH1_EFF_CD4_TCELL_D6_LCMV_DN                        | 157 | 0.37835312 | 16.954.633 | 0.001342281 | 5,00E+02 | 0.382 |
| GSE24726_WT_VS_E2-2_KO_PDC_DAY6_POST_DELETION_DN                      | 197 | 0.36723983 | 1.694.978  | 0.0         | 5,04E+02 | 0.384 |
| GSE3982_MAST_CELL_VS_CENT_MEMORY_CD4_TCELL_DN                         | 187 | 0.3919017  | 18.084.694 | 0.0         | 5,06E+02 | 0.038 |
| GSE37605_TREG_VS_TCONV_NOD_FOXP3_FUSION_GFP_UP                        | 141 | 0.40751398 | 18.090.929 | 0.0         | 5,06E+02 | 0.038 |
| GSE20715_WT_VS_TLR4_KO_LUNG_UP                                        | 196 | 0.37096664 | 16.943.752 | 0.0         | 5,15E+02 | 0.394 |
| GSE17301_ACD3_ACD28_VS_ACD3_ACD28_AND_IFNA2_STIM_CD8_TCELL_DN         | 196 | 0.36731    | 16.942.495 | 0.0         | 5,16E+02 | 0.396 |
| GSE7852_THYMUS_VS_FAT_TCONV_DN                                        | 194 | 0.38788766 | 18.084.189 | 0.0         | 5,18E+02 | 0.039 |
| GSE32986_GMCSF_VS_GMCSF_AND_CURDLAN_LOWDOSE_STIM_DC_DN                | 179 | 0.37433827 | 16.936.569 | 0.0         | 5,22E+02 | 0.399 |
| GSE12366_PLASMA_CELL_VS_NAIVE_BCELL_DN                                | 190 | 0.36727616 | 16.937.693 | 0.0         | 5,22E+02 | 0.399 |
| GSE23568_CTRL_VS_ID3_TRANSDUCE_CD8_TCELL_UP                           | 195 | 0.39092872 | 18.075.949 | 0.0         | 5,29E+02 | 0.04  |
| GSE2770_TGFB_AND_IL4_VS_IL12_TREATED_ACT_CD4_TCELL_2H_DN              | 183 | 0.39510712 | 1.806.719  | 0.0         | 5,42E+02 | 0.04  |
| GSE6259_FLT3L_INDUCED_DEC205_POS_DC_VS_CD8_TCELL_UP                   | 142 | 0.40516847 | 18.031.344 | 0.0         | 5,65E+02 | 0.042 |
| GSE24634_NAIVE_CD4_TCELL_VS_DAY3_IL4_CONV_TREG_UP                     | 185 | 0.39566475 | 18.031.883 | 0.0         | 5,66E+02 | 0.042 |
| GSE9988_LPS_VS_CTRL_TREATED_MONOCYTE_UP                               | 177 | 0.3667316  | 16.885.817 | 0.0         | 5,66E+02 | 0.427 |
| GSE3039_CD4_TCELL_VS_B1_BCELL_DN                                      | 192 | 0.39132586 | 17.998.941 | 0.0         | 5,73E+02 | 0.042 |
| GSE24574_BCL6_HIGH_TFH_VS_NAIVE_CD4_TCELL_UP                          | 192 | 0.36576262 | 16.878.586 | 0.0         | 5,74E+02 | 0.431 |
| GSE24634_IL4_VS_CTRL_TREATED_NAIVE_CD4_TCELL_DAY7_DN                  | 191 | 0.367193   | 1.687.944  | 0.0         | 5,74E+02 | 0.431 |
| GSE557_CIITA_KO_VS_I_AB_KO_DC_UP                                      | 193 | 0.39059284 | 18.003.126 | 0.0         | 5,75E+02 | 0.042 |
| GSE17974_OH_VS_1H_IN_VITRO_ACT_CD4_TCELL_UP                           | 171 | 0.3976436  | 1.800.888  | 0.0         | 5,76E+02 | 0.042 |
| GSE7764_IL15_NK_CELL_24H_VS_SPLENOCYTE_DN                             | 191 | 0.3696331  | 16.873.062 | 0.0         | 5,76E+02 | 0.433 |
| GSE36888_UNTREATED_VS_IL2_TREATED_STAT5_AB_KNOCKIN_TCELL_6H_UP        | 183 | 0.39166173 | 18.011.893 | 0.0         | 5,76E+02 | 0.042 |
| GSE30083_SP1_VS_SP2_THYMOCYTE_DN                                      | 196 | 0.390458   | 17.989.126 | 0.0         | 5,84E+02 | 0.043 |
| GSE7509_DC_VS_MONOCYTE_UP                                             | 196 | 0.3871221  | 17.992.798 | 0.0         | 5,85E+02 | 0.043 |
| GSE22313_HEALTHY_VS_SLE_MOUSE_CD4_TCELL_DN                            | 193 | 0.38795966 | 17.971.448 | 0.0         | 5,91E+02 | 0.044 |
| GSE28726_NAIVE_CD4_TCELL_VS_NAIVE_VA24NEG_NKTCCELL_DN                 | 194 | 0.38603568 | 179.732    | 0.0         | 5,92E+02 | 0.044 |
| GSE19401_UNSTIM_VS_RETINOIC_ACID_STIM_FOLLICULAR_DC_DN                | 190 | 0.38820308 | 17.973.901 | 0.0         | 5,93E+02 | 0.044 |
| GSE43955_1H_VS_60H_ACT_CD4_TCELL_UP                                   | 196 | 0.38976467 | 17.975.225 | 0.0         | 5,93E+02 | 0.044 |
| GSE32423_MEMORY_VS_NAIVE_CD8_TCELL_IL7_UP                             | 187 | 0.39321527 | 17.976.576 | 0.0         | 5,94E+02 | 0.044 |
| GSE43955_TH0_VS_TGFB_IL6_TH17_ACT_CD4_TCELL_4H_DN                     | 196 | 0.3894984  | 17.976.724 | 0.0         | 5,95E+02 | 0.044 |
| GSE15330_HSC_VS_LYMPHOID_PRIMED_MULTIPOTENT_PROGENITOR_DN             | 177 | 0.39477935 | 17.963.971 | 0.0         | 6,03E+02 | 0.045 |
| GSE6259_FLT3L_INDUCED_DEC205_POS_DC_VS_BCELL_DN                       | 156 | 0.37552908 | 16.842.868 | 0.0         | 6,17E+02 | 0.46  |
| GSE22886_NAIVE_BCELL_VS_DC_DN                                         | 195 | 0.36125636 | 16.837.094 | 0.0         | 6,19E+02 | 0.46  |
| GSE33424_CD161_HIGH_VS_NEG_CD8_TCELL_DN                               | 192 | 0.3643757  | 16.827.388 | 0.0         | 6,27E+02 | 0.468 |
| GSE24634_NAIVE_CD4_TCELL_VS_DAY5_IL4_CONV_TREG_UP                     | 189 | 0.36343858 | 16.823.387 | 0.0         | 6,32E+02 | 0.47  |
| GSE3982_MAST_CELL_VS_TH1_DN                                           | 196 | 0.36368996 | 16.821.822 | 0.0         | 6,33E+02 | 0.47  |
| GSE37301_CD4_TCELL_VS_RAG2_KO_NK_CELL_UP                              | 142 | 0.40399885 | 17.950.983 | 0.0         | 6,40E+02 | 0.048 |
| GSE40274_FOXP3_VS_FOXP3_AND_SATB1_TRANSDUCE_ACTIVATED_CD4_TCELL_UP    | 125 | 0.3840368  | 16.803.486 | 0.001386962 | 6,48E+02 | 0.477 |
| GSE25088_CTRL_VS_IL4_STIM_MACROPHAGE_UP                               | 178 | 0.39518753 | 17.938.589 | 0.0         | 6,50E+02 | 0.049 |
| GSE26669_CD4_VS_CD8_TCELL_IN_MLR_COSTIM_BLOCK_DN                      | 195 | 0.3619961  | 1.679.203  | 0.0         | 6,58E+02 | 0.482 |
| GSE28737_FOLLICULAR_VS_MARGINAL_ZONE_BCELL_DN                         | 194 | 0.36331216 | 16.793.096 | 0.0         | 6,58E+02 | 0.482 |
| GSE9509_LPS_VS_LPS_AND_IL10_STIM_IL10_KO_MACROPHAGE_20MIN_UP          | 174 | 0.38994464 | 17.928.946 | 0.0         | 6,71E+02 | 0.051 |
| GSE28737_WT_VS_BCL6_KO_FOLLICULAR_BCELL_DN                            | 195 | 0.36390668 | 16.777.568 | 0.0         | 6,80E+02 | 0.496 |
| GSE21670_STAT3_KO_VS_WT_CD4_TCELL_IL6_TREATED_DN                      | 191 | 0.39080045 | 17.916.682 | 0.0         | 6,80E+02 | 0.052 |
| GSE6259_CD4_TCELL_VS_CD8_TCELL_UP                                     | 178 | 0.3952275  | 179.202    | 0.0         | 6,81E+02 | 0.052 |
| GSE19923_E2A_KO_VS_HEB_AND_E2A_KO_DP_THYMOCYTE_DN                     | 177 | 0.3670963  | 1.675.427  | 0.0         | 7,01E+02 | 0.512 |
| GSE7596_AKT_TRANS_VS_CTRL_CD4_TCONV_WITH_TGFB_DN                      | 113 | 0.3891536  | 16.733.131 | 0.001470588 | 7,32E+02 | 0.527 |
| GSE2128_C57BL6_VS_NOD_THYMOCYTE_DN                                    | 190 | 0.36358413 | 16.732.413 | 0.0         | 7,34E+02 | 0.528 |
| GSE21927_SPLEEN_C57BL6_VS_E4_TUMOR_BALBC_MONOCYTES_UP                 | 192 | 0.36236194 | 16.698.363 | 0.0         | 7,83E+02 | 0.557 |
| GSE9509_LPS_VS_LPS_AND_IL10_STIM_IL10_KO_MACROPHAGE_30MIN_UP          | 182 | 0.36532775 | 16.696.919 | 0.0         | 7,84E+02 | 0.558 |



|                                                                             |     |            |            |             |          |       |
|-----------------------------------------------------------------------------|-----|------------|------------|-------------|----------|-------|
| GSE27241_WT_VS_RORGT_KO_TH17_POLARIZED_CD4_TCELL_TREATED_WITH_DIGOXIN_DN    | 174 | 0.37121463 | 16.691.254 | 0.001317523 | 7,92E+02 | 0.56  |
| GSE11961_FOLLICULAR_BCELL_VS_GERMINAL_CENTER_BCELL_DAY40_UP                 | 193 | 0.36154425 | 16.686.503 | 0.0         | 7,99E+02 | 0.562 |
| GSE22886_NAIVE_CD8_TCELL_VS_MEMORY_TCELL_DN                                 | 198 | 0.38742843 | 17.861.239 | 0.0         | 8,05E+02 | 0.061 |
| GSE4142_PLASMA_CELL_VS_MEMORY_BCELL_UP                                      | 193 | 0.36180848 | 1.667.345  | 0.001308900 | 8,22E+02 | 0.575 |
| GSE26488_WT_VS_VP16_TRANSGENIC_HDAC7_KO_DOUBLE_POSITIVE_THYMOCYTE_DN        | 161 | 0.3719252  | 16.666.412 | 0.0         | 8,30E+02 | 0.577 |
| GSE32901_NAIVE_VS_TH1_CD4_TCELL_UP                                          | 123 | 0.41266978 | 17.829.053 | 0.0         | 8,75E+02 | 0.067 |
| GSE3039_CD4_TCELL_VS_NKT_CELL_UP                                            | 189 | 0.35994253 | 16.630.973 | 0.001342281 | 8,82E+02 | 0.601 |
| GSE19825_CD24LOW_VS_IL2RA_HIGH_DAY3_EFF_CD8_TCELL_UP                        | 188 | 0.3599255  | 16.626.036 | 0.001297016 | 8,84E+02 | 0.601 |
| GSE23321_EFFECTOR_MEMORY_VS_NAIVE_CD8_TCELL_UP                              | 192 | 0.35995853 | 16.622.484 | 0.0         | 8,85E+02 | 0.602 |
| GSE3982_MAC_VS_NEUTROPHIL_DN                                                | 192 | 0.36027828 | 16.622.884 | 0.0         | 8,86E+02 | 0.602 |
| GSE17974_IL4_AND_ANTI_IL12_VS_UNTREATED_1H_ACT_CD4_TCELL_UP                 | 160 | 0.39348406 | 17.825.304 | 0.0         | 8,86E+02 | 0.068 |
| GSE20366_TREG_VS_TCONV_DN                                                   | 195 | 0.3862004  | 17.812.343 | 0.0         | 9,22E+02 | 0.071 |
| GSE34006_UNTREATED_VS_AZAR_AGONIST_TREATED_TREG_DN                          | 194 | 0.38857505 | 17.805.609 | 0.0         | 9,32E+02 | 0.072 |
| GSE3982_MAC_VS_BASOPHIL_DN                                                  | 188 | 0.35876775 | 16.591.526 | 0.0         | 9,38E+02 | 0.627 |
| GSE7852_TREG_VS_TCONV_LN_DN                                                 | 192 | 0.38433272 | 17.793.238 | 0.0         | 9,40E+02 | 0.073 |
| GSE25123_WT_VS_PPARG_KO_MACROPHAGE_ROSIGLITAZONE_STIM_DN                    | 160 | 0.37109753 | 16.589.533 | 0.0         | 9,41E+02 | 0.627 |
| GSE5589_UNSTIM_VS_180MIN_LPS_AND_IL10_STIM_MACROPHAGE_DN                    | 193 | 0.35870972 | 16.583.353 | 0.0         | 9,49E+02 | 0.633 |
| GSE18281_CORTEX_VS_MEDULLA_THYMUS_DN                                        | 172 | 0.3873669  | 17.785.736 | 0.001386962 | 9,51E+02 | 0.074 |
| GSE2405_0H_VS_3H_A_PHAGOCYTOPHILUM_STIM_NEUTROPHIL_DN                       | 179 | 0.391827   | 17.779.711 | 0.0         | 9,62E+02 | 0.075 |
| GSE3982_NEUTROPHIL_VS_BCELL_UP                                              | 196 | 0.35909602 | 16.574.414 | 0.0         | 9,63E+02 | 0.64  |
| GSE2935_UV_INACTIVATED_VS_LIVE_SENDAI_VIRUS_INF_MACROPHAGE_UP               | 168 | 0.36530265 | 16.573.558 | 0.001349527 | 9,64E+02 | 0.64  |
| GSE40274_LEF1_VS_FOXP3_AND_LEF1_TRANSDUCED_ACTIVATED_CD4_TCELL_DN           | 193 | 0.3597376  | 16.569.114 | 0.001302083 | 9,68E+02 | 0.641 |
| GSE7764_NKCELL_VS_SPLENOCYTE_UP                                             | 195 | 0.3595696  | 16.558.994 | 0.0         | 9,88E+02 | 0.646 |
| GSE35685_CD34POS_CD38NEG_VS_CD34POS_CD10POS_BONE_MARROW_DN                  | 196 | 0.35745928 | 16.559.173 | 0.0         | 9,88E+02 | 0.646 |
| GSE6259_DEC205_POS_DC_VS_CD8_TCELL_DN                                       | 153 | 0.37217718 | 16.554.321 | 0.0         | 9,90E+02 | 0.648 |
| GSE19941_LPS_VS_LPS_AND_IL10_STIM_IL10_KO_NFKBP50_KO_MACROPHAGE_DN          | 195 | 0.3546907  | 16.555.965 | 0.0         | 9,90E+02 | 0.647 |
| KAECH_NAIVE_VS_DAY8_EFF_CD8_TCELL_DN                                        | 197 | 0.35891783 | 16.553.026 | 0.0         | 9,94E+02 | 0.648 |
| GSE40274_FOXP3_VS_FOXP3_AND_EOS_TRANSDUCED_ACTIVATED_CD4_TCELL_UP           | 192 | 0.38722393 | 1.776.697  | 0.0         | 1,01E+03 | 0.079 |
| GSE3982_CENT_MEMORY_CD4_TCELL_VS_TH2_UP                                     | 191 | 0.40672722 | 18.611.623 | 0.0         | 1,03E+03 | 0.007 |
| GSE32423_MEMORY_VS_NAIVE_CD8_TCELL_IL7_IL4_UP                               | 192 | 0.38541603 | 17.756.807 | 0.0         | 1,07E+03 | 0.082 |
| GSE22886_NAIVE_CD8_TCELL_VS_NEUTROPHIL_DN                                   | 186 | 0.3835567  | 17.725.544 | 0.0         | 1,20E+03 | 0.094 |
| GSE28726_ACT_CD4_TCELL_VS_ACT_NKTCCELL_DN                                   | 192 | 0.38477707 | 17.722.377 | 0.0         | 1,21E+03 | 0.095 |
| GSE8835_HEALTHY_VS_CLL_CD4_TCELL_UP                                         | 191 | 0.38330737 | 17.717.803 | 0.0         | 1,22E+03 | 0.096 |
| GSE7460_CTRL_VS_TGFB_TREATED_ACT_CD8_TCELL_DN                               | 189 | 0.38486105 | 17.708.302 | 0.0         | 1,23E+03 | 0.097 |
| GSE24210_RESTING_TREG_VS_TCONV_UP                                           | 196 | 0.3817066  | 17.696.393 | 0.0         | 1,28E+03 | 0.1   |
| GSE22601_IMMATURE_CD4_SINGLE_POSITIVE_VS_DOUBLE_POSITIVE_THYMOCYTE_DN       | 190 | 0.38232017 | 1.769.042  | 0.0         | 1,28E+03 | 0.101 |
| GSE20366_CD103_POS_VS_NEG_TREG_KLRG1NEG_DN                                  | 197 | 0.3802959  | 17.692.988 | 0.0         | 1,29E+03 | 0.101 |
| GSE45365_NK_CELL_VS_BCELL_DN                                                | 134 | 0.40156317 | 17.692.988 | 0.0         | 1,29E+03 | 0.101 |
| GSE369_PRE_VS_POST_IL6_INJECTION_SOCS3_KO_LIVER_DN                          | 194 | 0.38244393 | 17.679.794 | 0.0         | 1,34E+03 | 0.105 |
| GSE26890_CXCR1_NEG_VS_POS_EFFECTOR_CD8_TCELL_UP                             | 193 | 0.3844405  | 17.658.869 | 0.0         | 1,44E+03 | 0.112 |
| GSE9988_LPS_VS_CTRL_TREATED_MONOCYTE_DN                                     | 190 | 0.3823486  | 17.651.867 | 0.0         | 1,47E+03 | 0.113 |
| GSE24142_EARLY_THYMIC_PROGENITOR_VS_DN2_THYMOCYTE_FETAL_DN                  | 195 | 0.38151914 | 1.764.148  | 0.0         | 1,49E+03 | 0.115 |
| GSE3337_CTRL_VS_16H_IFNG_IN_CD8POS_DC_UP                                    | 198 | 0.38058105 | 1.764.431  | 0.0         | 1,49E+03 | 0.115 |
| GSE43955_TH0_VS_TGFB_IL6_TH17_ACT_CD4_TCELL_30H_UP                          | 195 | 0.3807261  | 17.631.669 | 0.0         | 1,50E+03 | 0.116 |
| GSE6269_STAPH_AUREUS_VS_STREP_PNEUMO_INF_PBMCC_UP                           | 151 | 0.38892746 | 17.634.727 | 0.0         | 1,51E+03 | 0.116 |
| GSE36888_STAT5_AB_KNOCKIN_VS_WT_TCELL_IL2_TREATED_17H_DN                    | 192 | 0.3813905  | 17.629.797 | 0.0         | 1,51E+03 | 0.116 |
| GSE3982_EFF_MEMORY_CD4_TCELL_VS_NKCELL_DN                                   | 190 | 0.38422072 | 17.620.713 | 0.0         | 1,52E+03 | 0.117 |
| GSE11864_CSF1_IFNG_VS_CSF1_PAM3CYS_IN_MAC_UP                                | 193 | 0.38218483 | 17.620.822 | 0.0         | 1,52E+03 | 0.117 |
| GSE26495_PD1HIGH_VS_PD1LOW_CD8_TCELL_DN                                     | 164 | 0.3903678  | 17.620.287 | 0.0         | 1,53E+03 | 0.118 |
| GSE18893_TCONV_VS_TREG_2H_TNF_STIM_DN                                       | 182 | 0.382816   | 17.613.428 | 0.0         | 1,55E+03 | 0.119 |
| GSE360_T_GONDII_VS_B_MALAYI_LOW_DOSE_DC_UP                                  | 191 | 0.37787437 | 17.614.722 | 0.001300390 | 1,55E+03 | 0.119 |
| GSE45365_NK_CELL_VS_BCELL_MCMV_INFECTION_DN                                 | 191 | 0.38149658 | 17.597.581 | 0.0         | 1,59E+03 | 0.122 |
| GSE20727_CTRL_VS_H2O2_TREATED_DC_DN                                         | 180 | 0.38185203 | 17.599.833 | 0.0         | 1,59E+03 | 0.122 |
| GSE41867_DAY6_EFFECTOR_VS_DAY30_MEMORY_CD8_TCELL_LCMV_ARMSTRONG_DN          | 191 | 0.38178578 | 17.582.556 | 0.0         | 1,65E+03 | 0.127 |
| GSE44955_MCSF_VS_MCSF_AND_IL27_STIM_MACROPHAGE_UP                           | 190 | 0.38192773 | 17.584.233 | 0.0         | 1,65E+03 | 0.127 |
| GSE7831_UNSTIM_VS_CPG_STIM_PDC_1H_UP                                        | 197 | 0.3815038  | 1.757.589  | 0.0         | 1,69E+03 | 0.129 |
| GSE19888_CTRL_VS_A3R_INHIBITOR_TREATED_MAST_CELL_DN                         | 176 | 0.38461065 | 17.566.121 | 0.0         | 1,72E+03 | 0.131 |
| GSE360_L_DONOVANI_VS_B_MALAYI_LOW_DOSE_DC_UP                                | 194 | 0.37925127 | 17.564.205 | 0.001324503 | 1,74E+03 | 0.133 |
| GSE40274_GATA1_VS_FOXP3_AND_GATA1_TRANSDUCED_ACTIVATED_CD4_TCELL_UP         | 194 | 0.37878153 | 17.546.813 | 0.0         | 1,78E+03 | 0.137 |
| GSE7534_GW1929_VS_PIOGLITAZONE_TREATED_CD4_TCELL_PPARG1_FOXP3_TRANSDUCED_UP | 193 | 0.3763092  | 17.544.547 | 0.0         | 1,79E+03 | 0.138 |
| GSE1460_DP_THYMOCYTE_VS_NAIVE_CD4_TCELL_CORD_BLOOD_DN                       | 190 | 0.37871408 | 17.541.034 | 0.0         | 1,81E+03 | 0.14  |
| GSE9988_LOW_LPS_VS_CTRL_TREATED_MONOCYTE_UP                                 | 180 | 0.3847432  | 17.542.979 | 0.0         | 1,81E+03 | 0.14  |
| GSE4748_LPS_VS_LPS_AND_CYANOBACTERIUM_LPSLIKE_STIM_DC_3H_UP                 | 179 | 0.38324446 | 17.527.719 | 0.0         | 1,82E+03 | 0.142 |
| GSE3039_ALPHABETA_CD8_TCELL_VS_B2_BCELL_UP                                  | 192 | 0.38466376 | 17.521.118 | 0.0         | 1,84E+03 | 0.144 |
| GSE29617_CTRL_VS_DAY7_TIV_FLU_VACCINE_PBMCC_2008_UP                         | 182 | 0.3867471  | 17.522.441 | 0.0         | 1,85E+03 | 0.144 |
| GSE16385_UNTREATED_VS_12H_ROSIGLITAZONE_IFNG_TNF_TREATED_MACROPHAGE_UP      | 189 | 0.38051784 | 17.514.966 | 0.0         | 1,85E+03 | 0.145 |
| GSE14769_UNSTIM_VS_120MIN_LPS_BMDM_DN                                       | 194 | 0.37803525 | 17.509.727 | 0.0         | 1,86E+03 | 0.146 |
| GSE22025_UNTREATED_VS_PROGESTERONE_TREATED_CD4_TCELL_UP                     | 190 | 0.38224912 | 1.749.349  | 0.0         | 1,91E+03 | 0.151 |
| GSE28726_NAIVE_CD4_TCELL_VS_NAIVE_NKTCCELL_DN                               | 198 | 0.3754095  | 1.748.434  | 0.0         | 1,95E+03 | 0.155 |
| GSE3982_MAST_CELL_VS_MAC_DN                                                 | 190 | 0.37850857 | 17.481.426 | 0.0         | 1,99E+03 | 0.158 |
| GSE14350_IL2RB_KO_VS_WT_TREG_DN                                             | 200 | 0.3763686  | 17.466.496 | 0.0         | 2,01E+03 | 0.159 |
| GSE43955_TH0_VS_TGFB_IL6_TH17_ACT_CD4_TCELL_52H_DN                          | 194 | 0.37693134 | 17.456.616 | 0.0         | 2,05E+03 | 0.161 |
| GSE25123_IL4_VS_IL4_AND_ROSIGLITAZONE_STIM_PPARG_KO_MACROPHAGE_DAY10_DN     | 185 | 0.37614805 | 17.443.104 | 0.0         | 2,05E+03 | 0.161 |
| GSE3720_LPS_VS_PMA_STIM_VD1_GAMMADELTA_TCELL_UP                             | 137 | 0.39408886 | 17.431.884 | 0.0         | 2,12E+03 | 0.166 |
| GSE44649_WT_VS_MIR155_KO_NAIVE_CD8_TCELL_DN                                 | 193 | 0.37931687 | 17.426.935 | 0.0         | 2,13E+03 | 0.167 |
| GSE17721_PAM3CSK4_VS_GADIQUIMOD_4H_BMDM_DN                                  | 196 | 0.37952405 | 1.742.071  | 0.0         | 2,14E+03 | 0.168 |
| GSE36009_UNSTIM_VS_LPS_STIM_DC_UP                                           | 197 | 0.37757722 | 17.411.623 | 0.0         | 2,20E+03 | 0.172 |
| GSE20366_CD103_POS_VS_CD103_KLRG1_DP_TREG_DN                                | 197 | 0.37853912 | 17.404.612 | 0.0         | 2,27E+03 | 0.179 |
| GSE28737_BCL6_HET_VS_BCL6_KO_FOLLICULAR_BCELL_DN                            | 194 | 0.37635157 | 1.740.231  | 0.0         | 2,28E+03 | 0.18  |
| GSE360_LOW_DOSE_B_MALAYI_VS_M_TUBERCULOSIS_MAC_DN                           | 194 | 0.37417942 | 17.387.471 | 0.0         | 2,36E+03 | 0.188 |
| GSE26669_CTRL_VS_COSTIM_BLOCK_MLR_CD4_TCELL_DN                              | 191 | 0.3748314  | 17.380.773 | 0.0         | 2,37E+03 | 0.189 |
| GSE19198_6H_VS_24H_IL21_TREATED_TCELL_UP                                    | 188 | 0.37849265 | 1.737.627  | 0.0         | 2,40E+03 | 0.192 |
| GSE29618_PRE_VS_DAY7_FLU_VACCINE_MDC_UP                                     | 190 | 0.37445074 | 17.361.977 | 0.0         | 2,48E+03 | 0.194 |
| GSE25088_IL4_VS_IL4_AND_ROSIGLITAZONE_STIM_STAT6_KO_MACROPHAGE_DAY10_DN     | 190 | 0.3783663  | 17.355.566 | 0.0         | 2,49E+03 | 0.195 |
| GSE17974_CTRL_VS_ACT_IL4_AND_ANTI_IL12_72H_CD4_TCELL_UP                     | 183 | 0.37995666 | 17.355.734 | 0.0         | 2,49E+03 | 0.195 |
| GSE15930_STIM_VS_STIM_AND_IFNAB_72H_CD8_T_CELL_UP                           | 193 | 0.37312135 | 17.336.166 | 0.0         | 2,55E+03 | 0.201 |
| GSE29618_MONOCYTE_VS_PDC_DN                                                 | 191 | 0.37706748 | 17.337.023 | 0.0         | 2,55E+03 | 0.201 |
| GSE12839_CTRL_VS_IL12_TREATED_PBMCC_DN                                      | 112 | 0.4050868  | 17.329.537 | 0.001472754 | 2,59E+03 | 0.205 |
| GSE22432_MULTIPOTENT_PROGENITOR_VS_CDC_UP                                   | 197 | 0.37599027 | 17.326.639 | 0.0         | 2,59E+03 | 0.206 |

|                                                                       |     |            |            |             |          |       |
|-----------------------------------------------------------------------|-----|------------|------------|-------------|----------|-------|
| GSE17721_12H_VS_24H_GARDIQUIMOD_BMDM_UP                               | 197 | 0.37626135 | 17.320.517 | 0.0         | 2,63E+03 | 0.209 |
| GSE39820_CTRL_VS_IL1B_IL6_IL23A_CD4_TCELL_DN                          | 195 | 0.3702546  | 17.297.505 | 0.0         | 2,76E+03 | 0.217 |
| GSE22886_UNSTIM_VS_IL15_STIM_NKCELL_UP                                | 186 | 0.37553412 | 17.280.351 | 0.0         | 2,86E+03 | 0.223 |
| GSE20366_EX_VIVO_VS_DEC205_CONVERSION_NAIVE_CD4_TCELL_UP              | 195 | 0.37738943 | 17.267.830 | 0.0         | 2,93E+03 | 0.23  |
| GSE22886_NAIVE_CD8_TCELL_VS_NKCELL_DN                                 | 191 | 0.3778723  | 1.725.561  | 0.0         | 2,96E+03 | 0.231 |
| GSE3982_NEUTROPHIL_VS_TH1_UP                                          | 192 | 0.37341008 | 1.724.609  | 0.0         | 3,06E+03 | 0.24  |
| GSE3982_BASOPHIL_VS_TH1_UP                                            | 191 | 0.37571573 | 17.240.535 | 0.0         | 3,11E+03 | 0.245 |
| GSE46242_TH1_VS_ANERGIC_TH1_CD4_TCELL_WITH_EGR2_DELETED_UP            | 189 | 0.37607518 | 17.240.415 | 0.0         | 3,12E+03 | 0.247 |
| GSE3920_UNTREATED_VS_IFNG_TREATED_FIBROBLAST_DN                       | 174 | 0.38023558 | 17.238.761 | 0.0         | 3,13E+03 | 0.248 |
| GSE22886_NAIVE_BCELL_VS_NEUTROPHIL_UP                                 | 194 | 0.3743073  | 17.231.891 | 0.0         | 3,20E+03 | 0.254 |
| GSE19401_NAIVE_VS_IMMUNIZED_MOUSE_PLN_FOLLICULAR_DC_UP                | 193 | 0.37129906 | 17.230.023 | 0.0         | 3,21E+03 | 0.255 |
| GSE7764_NKCELL_VS_SPLENOCYTE_DN                                       | 197 | 0.37046194 | 17.224.498 | 0.0         | 3,24E+03 | 0.258 |
| GSE1432_1H_VS_6H_IFNG_MICROGLIA_DN                                    | 196 | 0.3712212  | 17.207.916 | 0.0         | 3,35E+03 | 0.265 |
| GSE42021_CD24INT_VS_CD24LOW_TCONV_THYMUS_DN                           | 191 | 0.37051973 | 17.203.293 | 0.0         | 3,35E+03 | 0.266 |
| GSE3337_CTRL_VS_16H_IFNG_IN_CD8POS_DC_DN                              | 191 | 0.37392563 | 17.188.276 | 0.0         | 3,42E+03 | 0.269 |
| GSE17721_12H_VS_24H_LPS_BMDM_UP                                       | 195 | 0.37613183 | 17.183.763 | 0.0         | 3,43E+03 | 0.271 |
| GSE2706_R848_VS_LPS_2H_STIM_DC_DN                                     | 162 | 0.3775676  | 17.176.619 | 0.0         | 3,46E+03 | 0.272 |
| GSE3982_EOSINOPHIL_VS_TH2_UP                                          | 188 | 0.37511456 | 17.173.927 | 0.002597402 | 3,47E+03 | 0.273 |
| GSE19941_LPS_VS_LPS_AND_IL10_STIM_IL10_KO_NFKBP50_KO_MACROPHAGE_UP    | 192 | 0.37318438 | 17.168.794 | 0.0         | 3,52E+03 | 0.278 |
| GSE21927_GMCSF_IL6_VS_GMCSF_GCSF_TREATED_BONE_MARROW_UP               | 166 | 0.3825105  | 17.161.032 | 0.001347708 | 3,55E+03 | 0.281 |
| GSE32901_NAIVE_VS_TH1_CD4_TCELL_DN                                    | 162 | 0.37765437 | 17.150.065 | 0.0         | 3,58E+03 | 0.283 |
| GSE22886_NAIVE_VS_IGG_IGA_MEMORY_BCELL_UP                             | 189 | 0.3740779  | 17.140.766 | 0.0         | 3,65E+03 | 0.289 |
| GSE39110_DAY3_VS_DAY6_POST_IMMUNIZATION_CD8_TCELL_UP                  | 190 | 0.37359852 | 17.131.371 | 0.0         | 3,73E+03 | 0.293 |
| GSE411_UNSTIM_VS_100MIN_IL6_STIM_MACROPHAGE_DN                        | 192 | 0.37037137 | 17.130.378 | 0.0         | 3,73E+03 | 0.294 |
| GSE21927_C26GM_VS_4T1_TUMOR_MONOCYTE_BALBC_DN                         | 184 | 0.37351453 | 17.123.643 | 0.0         | 3,79E+03 | 0.296 |
| GSE3039_CD4_TCELL_VS_B1_BCELL_UP                                      | 195 | 0.36998808 | 17.119.299 | 0.0         | 3,81E+03 | 0.296 |
| GSE17974_IL4_AND_ANTI_IL12_VS_UNTREATED_72H_ACT_CD4_TCELL_UP          | 168 | 0.37536767 | 17.098.945 | 0.0         | 3,93E+03 | 0.305 |
| GSE43863_DAY6_EFF_VS_DAY150_MEM_TFH_CD4_TCELL_UP                      | 193 | 0.3697248  | 17.095.772 | 0.0         | 3,96E+03 | 0.305 |
| GSE5589_LPS_VS_LPS_AND_IL6_STIM_IL6_KO_MACROPHAGE_45MIN_UP            | 198 | 0.3697184  | 17.094.654 | 0.0         | 3,96E+03 | 0.306 |
| GSE360_L_MAJOR_VS_T_GONDII_MAC_UP                                     | 191 | 0.36586967 | 17.090.694 | 0.0         | 3,97E+03 | 0.307 |
| GSE9988_LPS_VS_VEHICLE_TREATED_MONOCYTE_UP                            | 178 | 0.37730658 | 17.088.509 | 0.0         | 3,99E+03 | 0.308 |
| GSE2770_IL12_AND_TGFB_VS_IL4_TREATED_ACT_CD4_TCELL_48H_UP             | 191 | 0.37146464 | 17.087.203 | 0.0         | 4,00E+03 | 0.309 |
| GSE37301_HEMATOPOIETIC_STEM_CELL_VS_RAG2_KO_NK_CELL_UP                | 169 | 0.37864596 | 17.083.174 | 0.0         | 4,02E+03 | 0.31  |
| GSE36527_CD62L_HIGH_CD69_NEG_VS_CD62L_LOW_CD69_POS_TREG_KLRG1_NEG_DN  | 192 | 0.36905733 | 17.075.223 | 0.0         | 4,13E+03 | 0.317 |
| GSE36392_TYPE_2_MYELOID_VS_EOSINOPHIL_IL25_TREATED_LUNG_DN            | 190 | 0.368225   | 17.074.853 | 0.0         | 4,13E+03 | 0.318 |
| GSE7852_TREG_VS_TCONV_FAT_DN                                          | 194 | 0.37285885 | 17.073.762 | 0.0         | 4,14E+03 | 0.319 |
| GSE25123_CTRL_VS_IL4_STIM_PPARG_KO_MACROPHAGE_DN                      | 193 | 0.37160107 | 17.072.835 | 0.0         | 4,15E+03 | 0.321 |
| GSE8921_3H_VS_24H_TLR1_2_STIM_MONOCYTE_UP                             | 192 | 0.3698379  | 17.070.295 | 0.0         | 4,16E+03 | 0.321 |
| GSE32533_WT_VS_MIR17_KO_ACT_CD4_TCELL_UP                              | 195 | 0.36487025 | 17.062.007 | 0.0         | 4,24E+03 | 0.328 |
| GSE17721_0.5H_VS_24H_CPG_BMDM_UP                                      | 196 | 0.3628996  | 17.051.774 | 0.0         | 4,31E+03 | 0.333 |
| GSE32986_CURDLAN_HIGHDOSE_VS_GMCSF_AND_CURDLAN_HIGHDOSE_STIM_DC_UP    | 189 | 0.3736508  | 17.048.949 | 0.0         | 4,33E+03 | 0.334 |
| GSE16385_IFNG_TNF_VS_UNSTIM_MACROPHAGE_ROSIGLITAZONE_TREATED_DN       | 191 | 0.36979237 | 17.049.177 | 0.0         | 4,33E+03 | 0.334 |
| GSE22443_NAIVE_VS_ACT_AND_IL12_TREATED_CD8_TCELL_UP                   | 195 | 0.37147924 | 17.043.614 | 0.0         | 4,38E+03 | 0.337 |
| GSE32986_CURDLAN_LOWDOSE_VS_CURDLAN_HIGHDOSE_STIM_DC_DN               | 195 | 0.3678283  | 17.028.685 | 0.0         | 4,41E+03 | 0.34  |
| GSE5589_IL6_KO_VS_IL10_KO_LPS_AND_IL10_STIM_MACROPHAGE_180MIN_UP      | 190 | 0.37209016 | 17.026.615 | 0.0         | 4,43E+03 | 0.341 |
| GSE7460_TCONV_VS_TREG_LN_UP                                           | 190 | 0.36565343 | 16.974.735 | 0.0         | 4,48E+03 | 0.369 |
| GSE13547_CTRL_VS_ANTI_IGM_STIM_ZFX_KO_BCELL_12H_DN                    | 157 | 0.3757693  | 16.961.627 | 0.0         | 4,94E+03 | 0.377 |
| GSE360_CTRL_VS_L_MAJOR_DC_DN                                          | 196 | 0.36411902 | 16.953.831 | 0.0         | 5,00E+03 | 0.382 |
| GSE8835_HEALTHY_VS_CLL_CD8_TCELL_DN                                   | 190 | 0.369747   | 16.953.919 | 0.001362397 | 5,01E+03 | 0.382 |
| GSE7460_CTRL_VS_TGFB_TREATED_ACT_TREG_DN                              | 191 | 0.36428186 | 16.950.862 | 0.0         | 5,02E+03 | 0.384 |
| GSE369_PRE_VS_POST_IL6_INJECTION_IFNG_WT_LIVER_DN                     | 192 | 0.36633968 | 16.936.423 | 0.001277139 | 5,21E+03 | 0.399 |
| GSE8868_SPLEEN_VS_INTESTINE_CD11B_POS_CD11C_NEG_DC_DN                 | 194 | 0.36863518 | 16.936.674 | 0.0         | 5,22E+03 | 0.399 |
| GSE14415_INDUCED_VS_NATURAL_TREG_UP                                   | 146 | 0.3790405  | 16.930.137 | 0.0         | 5,25E+03 | 0.4   |
| GSE39820_IL1B_IL6_VS_IL1B_IL6_IL23A_TREATED_CD4_TCELL_DN              | 189 | 0.36647832 | 16.918.837 | 0.0         | 5,34E+03 | 0.407 |
| GSE16697_CD4_TCELL_VS_TFH_CD4_TCELL_UP                                | 193 | 0.36945468 | 16.911.722 | 0.0         | 5,40E+03 | 0.41  |
| GSE1432_1H_VS_24H_IFNG_MICROGLIA_UP                                   | 199 | 0.36780855 | 16.911.767 | 0.0         | 5,40E+03 | 0.41  |
| GSE22886_UNSTIM_VS_IL2_STIM_NKCELL_UP                                 | 189 | 0.36888736 | 16.912.304 | 0.0         | 5,41E+03 | 0.41  |
| GSE25123_WT_VS_PPARG_KO_MACROPHAGE_ROSIGLITAZONE_STIM_UP              | 191 | 0.3660713  | 16.885.263 | 0.0         | 5,66E+03 | 0.427 |
| GSE1791_CTRL_VS_NEUROMEDINU_IN_T_CELL_LINE_12H_DN                     | 158 | 0.37123147 | 16.857.562 | 0.0         | 5,93E+03 | 0.443 |
| GSE17301_IFNA2_VS_IFNA2_AND_ACD3_ACD28_STIM_CD8_TCELL_DN              | 191 | 0.36521432 | 16.855.377 | 0.0         | 5,99E+03 | 0.447 |
| GSE3982_DC_VS_BCELL_DN                                                | 192 | 0.36618924 | 16.833.895 | 0.001303780 | 6,19E+03 | 0.462 |
| GSE28737_FOLLICULAR_VS_MARGINAL_ZONE_BCELL_BCL6_HET_UP                | 189 | 0.36677244 | 1.683.255  | 0.0         | 6,22E+03 | 0.462 |
| GSE40274_CTRL_VS_FOXP3_AND_HELIOS_TRANSDUCED_ACTIVATED_CD4_TCELL_UP   | 196 | 0.36561635 | 16.827.887 | 0.0         | 6,26E+03 | 0.467 |
| GSE3982_DC_VS_NEUTROPHIL_DN                                           | 192 | 0.36630738 | 16.825.722 | 0.001303780 | 6,30E+03 | 0.468 |
| GSE6259_FLT3L_INDUCED_33D1_POS_DC_VS_CD8_TCELL_DN                     | 145 | 0.37703127 | 16.817.312 | 0.0         | 6,36E+03 | 0.471 |
| GSE7831_CPG_VS_INFLUENZA_STIM_PDC_1H_DN                               | 199 | 0.36035922 | 16.787.622 | 0.0         | 6,64E+03 | 0.485 |
| GSE24210_IL35_TREATED_VS_RESTING_TREG_UP                              | 189 | 0.3671733  | 16.783.172 | 0.0         | 6,75E+03 | 0.491 |
| GSE32533_WT_VS_MIR17_OVEREXPRESS_ACT_CD4_TCELL_DN                     | 196 | 0.3612914  | 16.766.486 | 0.0         | 6,92E+03 | 0.506 |
| GSE46606_IRF4_KO_VS_WT_CD40L_IL2_IL5_1DAY_STIMULATED_BCELL_DN         | 184 | 0.36441195 | 16.763.787 | 0.0         | 6,94E+03 | 0.508 |
| GSE26495_PD1HIGH_VS_PD1LOW_CD8_TCELL_UP                               | 168 | 0.37199864 | 16.756.028 | 0.0         | 6,99E+03 | 0.511 |
| GSE19941_UNSTIM_VS_LPS_AND_IL10_STIM_IL10_KO_NFKBP50_KO_MACROPHAGE_UP | 163 | 0.37140957 | 1.675.622  | 0.001355013 | 7,00E+03 | 0.511 |
| GSE7460_WT_VS_FOXP3_HET_ACT_WITH_TGFB_TCONV_UP                        | 190 | 0.3607413  | 16.742.563 | 0.0         | 7,19E+03 | 0.52  |
| GSE7548_DAY7_VS_DAY28_PCC_IMMUNIZATION_CD4_TCELL_UP                   | 195 | 0.36377698 | 16.730.425 | 0.0         | 7,38E+03 | 0.53  |
| GSE15330_HSC_VS_MEGAKARYOCYTE_ERYTHROID_PROGENITOR_IKAROS_KO_DN       | 190 | 0.36011058 | 16.713.725 | 0.0         | 7,67E+03 | 0.546 |
| GSE2770_UNTREATED_VS_TGFB_AND_IL4_TREATED_ACT_CD4_TCELL_48H_DN        | 196 | 0.3557535  | 16.710.024 | 0.0         | 7,73E+03 | 0.55  |
| GSE2585_THYMIC_DC_VS_THYMIC_MACROPHAGE_DN                             | 189 | 0.3634492  | 16.702.305 | 0.0         | 7,81E+03 | 0.555 |
| GSE6259_FLT3L_INDUCED_VS_WT_SPLENIC_DC_33D1_POS_DN                    | 154 | 0.37333992 | 16.661.339 | 0.0         | 8,35E+03 | 0.58  |
| GSE22886_NAIVE_CD8_TCELL_VS_DC_DN                                     | 196 | 0.35849634 | 16.640.434 | 0.0         | 8,70E+03 | 0.595 |
| GSE27786_LIN_NEG_VS_CD4_TCELL_DN                                      | 189 | 0.35914135 | 16.635.891 | 0.0         | 8,77E+03 | 0.598 |
| GSE21774_CD62L_POS_CD56_BRIGHT_VS_CD62L_NEG_CD56_DIM_NK_CELL_DN       | 193 | 0.36038676 | 16.625.593 | 0.0         | 8,84E+03 | 0.602 |
| GSE43955_TH0_VS_TGFB_IL6_TH17_ACT_CD4_TCELL_1H_UP                     | 195 | 0.35904586 | 16.622.275 | 0.0         | 8,84E+03 | 0.602 |
| GSE41176_UNSTIM_VS_ANTI_IGM_STIM_BCELL_1H_UP                          | 196 | 0.3593062  | 16.626.258 | 0.0         | 8,85E+03 | 0.601 |
| GSE32901_NAIVE_VS_TH17_NEG_CD4_TCELL_DN                               | 121 | 0.38326457 | 16.615.615 | 0.0         | 9,03E+03 | 0.611 |
| GSE43863_TFH_VS_LY6C_INT_CXCR5POS_EFFECTOR_CD4_TCELL_DN               | 196 | 0.35942644 | 16.592.513 | 0.0         | 9,39E+03 | 0.627 |
| GSE37605_TREG_VS_TCONV_C57BL6_FOXP3_FUSION_GFP_DN                     | 164 | 0.36659005 | 16.587.633 | 0.0         | 9,43E+03 | 0.629 |
| GSE17974_IL4_AND_ANTI_IL12_VS_UNTREATED_4H_ACT_CD4_TCELL_DN           | 161 | 0.36737654 | 16.579.379 | 0.0         | 9,55E+03 | 0.637 |
| GSE41176_UNSTIM_VS_ANTI_IGM_STIM_BCELL_24H_UP                         | 189 | 0.3583447  | 16.564.248 | 0.0         | 9,73E+03 | 0.643 |
| GSE7460_TREG_VS_TCONV_ACT_UP                                          | 191 | 0.38674608 | 17.758.027 | 0.0         | 1,04E+04 | 0.08  |
| GSE3565_DUSP1_VS_WT_SPLENOCYTES_POST_LPS_INJECTION_DN                 | 148 | 0.39793614 | 17.747.124 | 0.0         | 1,10E+04 | 0.085 |

|          |                                                                                |     |            |            |             |             |       |
|----------|--------------------------------------------------------------------------------|-----|------------|------------|-------------|-------------|-------|
| GSE3039  | ALPHAALPHA_CD8_TCELL_VS_B1_BCELL_UP                                            | 198 | 0.38357833 | 17.741.715 | 0.0         | 1,11E+04    | 0.086 |
| GSE32533 | MIR17_KO_VS_MIR17_OVEREXPRESS_ACT_CD4_TCELL_DN                                 | 187 | 0.3874007  | 17.729.868 | 0.0         | 1,17E+04    | 0.091 |
| GSE23505 | UNTREATED_VS_4DAY_IL6_IL1_IL23_TREATED_CD4_TCELL_UP                            | 190 | 0.38547206 | 17.725.484 | 0.0         | 1,20E+04    | 0.094 |
| GSE15330 | HSC_VS_MEGAKARYOCYTE_ERYTHROID_PROGENITOR_IKAROS_KO_UP                         | 192 | 0.35646927 | 16.54.659  | 0.0         | 0.001003823 | 0.654 |
| GSE14769 | UNSTIM_VS_40MIN_LPS_BMDM_DN                                                    | 192 | 0.35781357 | 16.541.978 | 0.0         | 0.001012974 | 0.658 |
| GSE9960  | HEALTHY_VS_GRAM_NEG_SEPSIS_PBMC_DN                                             | 190 | 0.35687467 | 16.531.743 | 0.0         | 0.001028394 | 0.663 |
| GSE23321 | CENTRAL_MEMORY_VS_NAIVE_CD8_TCELL_DN                                           | 190 | 0.35493118 | 16.536.756 | 0.0         | 0.001028542 | 0.663 |
| GSE23308 | WT_VS_MINERALCORTICOID_REC_KO_MACROPHAGE_DN                                    | 193 | 0.360813   | 16.530.229 | 0.0         | 0.001029197 | 0.663 |
| GSE37301 | MULTIPOTENT_PROGENITOR_VS_COMMON_LYMPHOID_PROGENITOR_UP                        | 163 | 0.3633002  | 1.653.192  | 0.001314060 | 0.001029350 | 0.663 |
| GSE14415 | NATURAL_TREG_VS_FOXP3_KO_NATURAL_TREG_DN                                       | 144 | 0.37585503 | 16.532.764 | 0.001358695 | 0.001029382 | 0.663 |
| GSE2585  | THYMIC_MACROPHAGE_VS_MTEC_DN                                                   | 190 | 0.3600589  | 16.530.381 | 0.0         | 0.001030152 | 0.663 |
| GSE13522 | WT_VS_IFNAR_KO_SKIN_UP                                                         | 192 | 0.359066   | 16.533.256 | 0.0         | 0.001030341 | 0.663 |
| GSE7831  | 1H_VS_4H_CPG_STIM_PDC_DN                                                       | 191 | 0.3563299  | 16.522.185 | 0.0         | 0.001043689 | 0.669 |
| GSE17721 | CPG_VS_GARDIQUIMOD_1H_BMDM_UP                                                  | 194 | 0.35546952 | 16.522.582 | 0.0         | 0.001043746 | 0.668 |
| GSE22935 | WT_VS_MYD88_KO_MACROPHAGE_DN                                                   | 192 | 0.35508808 | 16.520.034 | 0.0         | 0.001044550 | 0.669 |
| GSE36891 | UNSTIM_VS_POLYIC_TLR3_STIM_PERITONEAL_MACROPHAGE_DN                            | 195 | 0.3573251  | 16.518.837 | 0.0         | 0.001046327 | 0.671 |
| GSE4590  | PRE_BCELL_VS_LARGE_PRE_BCELL_UP                                                | 153 | 0.37117246 | 16.508.355 | 0.001381215 | 0.001058960 | 0.676 |
| GSE20727 | CTRL_VS_H2O2_TREATED_DC_UP                                                     | 185 | 0.3560616  | 16.507.686 | 0.001267427 | 0.001059800 | 0.676 |
| GSE3982  | MAC_VS_TH1_UP                                                                  | 189 | 0.35746798 | 16.505.764 | 0.0         | 0.001064257 | 0.68  |
| GSE14142 | NAIVE_VS_GC_BCELL_UP                                                           | 192 | 0.35851654 | 16.501.002 | 0.0         | 0.001075898 | 0.683 |
| GSE46242 | CTRL_VS_EGR2_DELETED_ANERGIC_TH1_CD4_TCELL_UP                                  | 190 | 0.36073428 | 16.501.006 | 0.001302083 | 0.001076888 | 0.683 |
| GSE21063 | CTRL_VS_ANTI_IGM_STIM_BCELL_NFATC1_KO_3H_UP                                    | 196 | 0.36129618 | 16.496.714 | 0.0         | 0.001080335 | 0.684 |
| GSE17241 | WT_CTRL_VS_DIGOXIN_TREATED_RORGT_KO_CD4_TCELL_IN_TH17_POLARIZING_CONDITIONS_UP | 169 | 0.36390206 | 16.493.697 | 0.001356852 | 0.001090190 | 0.687 |
| GSE17301 | CTRL_VS_48H_ACD3_ACD28_IFNA5_STIM_CD8_TCELL_UP                                 | 194 | 0.3584164  | 1.649.093  | 0.001310616 | 0.001090996 | 0.688 |
| GSE19401 | UNSTIM_VS_RETINOIC_ACID_STIM_FOLLICULAR_DC_UP                                  | 196 | 0.35831657 | 1.648.576  | 0.0         | 0.001101712 | 0.693 |
| GSE32986 | UNSTIM_VS_GMCSF_AND_CURDLAN_HIGHDOSE_STIM_DC_DN                                | 176 | 0.36125848 | 1.647.868  | 0.0         | 0.001117800 | 0.704 |
| GSE43955 | THO_VS_TGFB_IL6_TH17_ACT_CD4_TCELL_4H_UP                                       | 198 | 0.35353082 | 1.647.604  | 0.0         | 0.001122191 | 0.705 |
| GSE17974 | CTRL_VS_ACT_IL4_AND_ANTI_IL12_2H_CD4_TCELL_UP                                  | 181 | 0.35894418 | 16.456.703 | 0.001349527 | 0.001154477 | 0.717 |
| GSE2770  | TGFB_AND_IL4_ACT_VS_ACT_CD4_TCELL_48H_DN                                       | 187 | 0.35958636 | 16.455.805 | 0.0         | 0.001157009 | 0.719 |
| GSE45365 | NK_CELL_VS_BCELL_MCMV_INFECTION_UP                                             | 191 | 0.35443735 | 16.453.525 | 0.0         | 0.001159551 | 0.721 |
| GSE6259  | 3D1_POS_DC_VS_CD8_TCELL_DN                                                     | 124 | 0.37707087 | 16.444.343 | 0.001377410 | 0.001183475 | 0.73  |
| GSE10240 | IL22_VS_IL22_AND_IL17_STIM_PRIMARY_BRONCHIAL_EPITHELIAL_CELLS_UP               | 194 | 0.3537748  | 1.644.468  | 0.0         | 0.001184553 | 0.73  |
| GSE37301 | MULTIPOTENT_PROGENITOR_VS_LYMPHOID_PRIMED_MPP_DN                               | 178 | 0.35797536 | 16.441.419 | 0.001302083 | 0.001187759 | 0.734 |
| GSE6092  | IFNG_VS_IFNG_AND_B_BURGDORFERI_INF_ENDOTHELIAL_CELL_DN                         | 172 | 0.36488745 | 16.437.029 | 0.0         | 0.001195651 | 0.738 |
| GSE7852  | THYMUS_VS_FAT_TREG_DN                                                          | 193 | 0.35633174 | 16.431.979 | 0.001317523 | 0.001201697 | 0.739 |
| GSE1925  | CTRL_VS_24H_IFNG_STIM_MACROPHAGE_UP                                            | 187 | 0.35868075 | 16.430.824 | 0.001295336 | 0.001203305 | 0.74  |
| GSE36476 | CTRL_VS_TSST_ACT_72H_MEMORY_CD4_TCELL_OLD_UP                                   | 190 | 0.35554767 | 16.422.814 | 0.0         | 0.001218308 | 0.746 |
| GSE6269  | FLU_VS_STAPH_AUREUS_INF_PBMC_UP                                                | 167 | 0.36394945 | 16.420.764 | 0.0         | 0.001223232 | 0.747 |
| GSE2405  | OH_VS_6H_A_PHAGOCYTOPHILUM_STIM_NEUTROPHIL_DN                                  | 172 | 0.36321324 | 16.421.145 | 0.0         | 0.001224339 | 0.747 |
| GSE17974 | CTRL_VS_ACT_IL4_AND_ANTI_IL12_0.5H_CD4_TCELL_DN                                | 170 | 0.36208084 | 16.412.832 | 0.0         | 0.001237244 | 0.753 |
| GSE3982  | MAC_VS_NKCELL_DN                                                               | 190 | 0.35559168 | 16.410.604 | 0.001328021 | 0.001240327 | 0.755 |
| GSE33425 | CD8_ALPHAALPHA_VS_ALPHA_BETA_CD161_HIGH_TCELL_DN                               | 196 | 0.35243088 | 16.409.955 | 0.001298701 | 0.001240966 | 0.755 |
| GSE22886 | IGA_VS_IGM_MEMORY_BCELL_DN                                                     | 192 | 0.3546334  | 16.410.867 | 0.0         | 0.001241447 | 0.755 |
| GSE24634 | TREG_VS_TCONV_POST_DAY10_IL4_CONVERSION_UP                                     | 196 | 0.35479486 | 16.401.119 | 0.0         | 0.001254892 | 0.765 |
| GSE40666 | WT_VS_STAT4_KO_CD8_TCELL_WITH_IFNA_STIM_90MIN_UP                               | 195 | 0.35368407 | 16.398.723 | 0.0         | 0.001263504 | 0.768 |
| GSE22886 | NAIVE_CD4_TCELL_VS_NEUTROPHIL_DN                                               | 189 | 0.35420102 | 16.395.522 | 0.001360544 | 0.001268327 | 0.77  |
| GSE3982  | BCELL_VS_NKCELL_UP                                                             | 190 | 0.3579518  | 16.395.997 | 0.001326259 | 0.001268594 | 0.77  |
| GSE17301 | CTRL_VS_48H_IFNA2_STIM_CD8_TCELL_DN                                            | 189 | 0.3577782  | 1.639.374  | 0.0         | 0.001271610 | 0.772 |
| GSE17721 | 0.5H_VS_12H_CPG_BMDM_DN                                                        | 195 | 0.35569975 | 16.391.428 | 0.0         | 0.001275511 | 0.774 |
| GSE4590  | LARGE_PRE_BCELL_VS_VPREB_POS_LARGE_PRE_BCELL_UP                                | 168 | 0.35971698 | 1.639.193  | 0.001369863 | 0.001276654 | 0.774 |
| GSE36891 | POLYIC_TLR3_VS_PAM_TLR2_STIM_PERITONEAL_MACROPHAGE_UP                          | 145 | 0.36793742 | 16.390.651 | 0.0         | 0.001277017 | 0.775 |
| GSE19888 | CTRL_VS_A3R_ACT_TREATED_MAST_CELL_PRETREATED_WITH_A3R_INH_UP                   | 192 | 0.35669464 | 16.386.327 | 0.0         | 0.001289954 | 0.777 |
| GSE21670 | IL6_VS_TGFB_AND_IL6_TREATED_CD4_TCELL_UP                                       | 181 | 0.36031106 | 16.378.143 | 0.0         | 0.001303489 | 0.779 |
| GSE29618 | BCELL_VS_PDC_DN                                                                | 194 | 0.3511899  | 163.787    | 0.0         | 0.001303772 | 0.779 |
| GSE10273 | HIGH_VS_LOW_IL7_TREATED_IRF4_8_NULL_PRE_BCELL_DN                               | 195 | 0.35043606 | 16.364.027 | 0.0         | 0.001336592 | 0.786 |
| GSE7460  | CTRL_VS_TGFB_TREATED_ACT_FOXP3_MUT_TCONV_DN                                    | 193 | 0.35065144 | 16.362.865 | 0.0         | 0.001339790 | 0.786 |
| GSE22935 | 24H_VS_48H_MBOVIS_BCG_STIM_MYD88_KO_MACROPHAGE_UP                              | 193 | 0.35849312 | 16.355.622 | 0.0         | 0.001353471 | 0.789 |
| GSE40277 | EOS_AND_LEF1_TRANSDUCECD_VS_GATA1_AND_SATB1_TRANSDUCECD_CD4_TCELL_UP           | 196 | 0.35277304 | 16.342.924 | 0.0         | 0.001389998 | 0.803 |
| GSE17721 | LPS_VS_GARDIQUIMOD_2H_BMDM_UP                                                  | 196 | 0.35368478 | 16.331.182 | 0.0         | 0.001422567 | 0.809 |
| GSE7460  | CTRL_VS_TGFB_TREATED_ACT_FOXP3_HET_TCONV_DN                                    | 192 | 0.35186574 | 1.633.146  | 0.001287001 | 0.001422933 | 0.809 |
| GSE41867 | DAY6_VS_DAY8_LCMV_CLONE13_EFFECTOR_CD8_TCELL_UP                                | 188 | 0.35026187 | 16.328.982 | 0.001288659 | 0.001424801 | 0.811 |
| GSE6269  | HEALTHY_VS_FLU_INF_PBMC_DN                                                     | 156 | 0.36336645 | 16.316.586 | 0.0         | 0.001456680 | 0.817 |
| GSE46606 | DAY1_VS_DAY3_CD40L_IL2_IL5_STIMULATED_BCELL_DN                                 | 183 | 0.35689887 | 16.314.851 | 0.0         | 0.001461482 | 0.817 |
| GSE43955 | THO_VS_TGFB_IL6_IL23_TH17_ACT_CD4_TCELL_60H_DN                                 | 194 | 0.3531379  | 16.309.795 | 0.0         | 0.001475002 | 0.822 |
| GSE24492 | LYVE_NEG_VS_POS_MACROPHAGE_DN                                                  | 191 | 0.35446405 | 16.296.802 | 0.0         | 0.001513772 | 0.831 |
| GSE7460  | CTRL_VS_TGFB_TREATED_ACT_TCONV_UP                                              | 195 | 0.3563169  | 16.291.643 | 0.0         | 0.001521984 | 0.831 |
| GSE11961 | GERMINAL_CENTER_BCELL_DAY7_VS_MEMORY_BCELL_DAY40_UP                            | 192 | 0.35241818 | 16.289.363 | 0.0         | 0.001524121 | 0.832 |
| GSE37301 | MULTIPOTENT_PROGENITOR_VS_GRAN_MONO_PROGENITOR_DN                              | 196 | 0.35030016 | 16.285.226 | 0.0         | 0.001532332 | 0.834 |
| GSE17721 | PAM3CSK4_VS_CPG_12H_BMDM_DN                                                    | 195 | 0.35559288 | 16.283.711 | 0.001305483 | 0.001534435 | 0.834 |
| GSE2770  | IL4_ACT_VS_ACT_CD4_TCELL_6H_UP                                                 | 177 | 0.35877174 | 16.283.009 | 0.0         | 0.001535684 | 0.834 |
| GSE3982  | BASOPHIL_VS_CENT_MEMORY_CD4_TCELL_UP                                           | 191 | 0.35338557 | 16.281.449 | 0.002680965 | 0.001537827 | 0.835 |
| GSE22140 | HEALTHY_VS_ARTHRITIC_GERMFREE_MOUSE_CD4_TCELL_UP                               | 198 | 0.34901494 | 16.271.516 | 0.0         | 0.001573598 | 0.844 |
| GSE36826 | NORMAL_VS_STAPH_AUREUS_INF_SKIN_DN                                             | 195 | 0.34921303 | 16.268.238 | 0.0         | 0.001580859 | 0.845 |
| GSE3720  | LPS_VS_PMA_STIM_VD1_GAMMADELTA_TCELL_DN                                        | 170 | 0.35553506 | 16.267.344 | 0.0         | 0.001585519 | 0.847 |
| GSE26559 | TCF1_KO_VS_WT_LIN_NEG_CELL_UP                                                  | 193 | 0.35572013 | 16.266.397 | 0.001291989 | 0.001586723 | 0.847 |
| GSE40274 | FOXP3_VS_FOXP3_AND_LEF1_TRANSDUCECD_ACTIVATED_CD4_TCELL_UP                     | 189 | 0.3529837  | 16.264.821 | 0.001270648 | 0.001588806 | 0.847 |
| GSE36078 | WT_VS_IL1R_KO_LUNG_DC_AFTER_AD5_INF_DN                                         | 195 | 0.35603327 | 16.259.509 | 0.0         | 0.001598057 | 0.85  |
| GSE3720  | UNSTIM_VS_LPS_STIM_VD1_GAMMADELTA_TCELL_UP                                     | 191 | 0.35022524 | 16.259.785 | 0.0         | 0.001598588 | 0.849 |
| GSE33424 | CD161_HIGH_VS_INT_CD8_TCELL_UP                                                 | 197 | 0.35067347 | 1.625.447  | 0.0         | 0.001606403 | 0.852 |
| GSE21927 | SPLENIC_VS_TUMOR_MONOCYTES_FROM_C26GM_TUMOROUS_MICE_BALBC_DN                   | 192 | 0.35093486 | 16.255.175 | 0.0         | 0.001606940 | 0.851 |
| GSE32034 | UNTREATED_VS_ROSIGLIZATONE_TREATED_LY6C_LOW_MONOCYTE_UP                        | 163 | 0.3564429  | 16.249.472 | 0.0         | 0.001611863 | 0.853 |
| GSE36392 | EOSINOPHIL_VS_MAC_IL25_TREATED_LUNG_UP                                         | 193 | 0.3513381  | 16.245.375 | 0.0         | 0.001627610 | 0.857 |
| GSE16450 | IMMATURE_VS_MATURE_NEURON_CELL_LINE_6H_IFNA_STIM_UP                            | 192 | 0.3510117  | 16.238.024 | 0.0         | 0.001652707 | 0.862 |
| GSE20727 | ROS_INH_VS_ROS_INH_AND_DNFB_ALLERGEN_TREATED_DC_DN                             | 171 | 0.35785493 | 16.227.683 | 0.001383125 | 0.001682077 | 0.867 |
| GSE26343 | UNSTIM_VS_LPS_STIM_MACROPHAGE_DN                                               | 195 | 0.35288233 | 162.271    | 0.0         | 0.001687479 | 0.867 |
| GSE9960  | GRAM_NEG_VS_GRAM_POS_SEPSIS_PBMC_UP                                            | 185 | 0.35511458 | 16.223.967 | 0.0         | 0.001693733 | 0.869 |
| GSE21063 | WT_VS_NFATC1_KO_16H_ANTI_IGM_STIM_BCELL_DN                                     | 171 | 0.35785672 | 16.223.418 | 0.002717391 | 0.001695689 | 0.869 |
| GSE10239 | NAIVE_VS_DAY4.5_EFF_CD8_TCELL_UP                                               | 192 | 0.34991243 | 16.220.772 | 0.001326259 | 0.001700204 | 0.869 |
| GSE40274 | CTRL_VS_IRF4_TRANSDUCECD_ACTIVATED_CD4_TCELL_UP                                | 157 | 0.3578501  | 16.201.277 | 0.002642008 | 0.001757643 | 0.879 |

|                                                                                          |     |            |            |             |             |       |
|------------------------------------------------------------------------------------------|-----|------------|------------|-------------|-------------|-------|
| GSE26495_NAIVE_VS_PD1HIGH_CD8_TCELL_UP                                                   | 172 | 0.3547902  | 16.198.618 | 0.001345895 | 0.001760416 | 0.879 |
| GSE35825_IFNA_VS_IFNG_STIM_MACROPHAGE_UP                                                 | 154 | 0.36204886 | 16.196.504 | 0.0         | 0.001769137 | 0.881 |
| GSE17580_UNINFECTED_VS_S_MANSONI_INF_TREG_UP                                             | 196 | 0.3479172  | 16.194.106 | 0.0         | 0.001775286 | 0.882 |
| GSE411_UNSTIM_VS_100MIN_IL6_STIM_MACROPHAGE_UP                                           | 190 | 0.35046268 | 16.192.234 | 0.0         | 0.001775459 | 0.882 |
| GSE24574_BCL6_HIGH_TFH_VS_TFH_CD4_TCELL_DN                                               | 196 | 0.35006225 | 16.188.163 | 0.0         | 0.001784139 | 0.885 |
| GSE3982_EOSINOPHIL_VS_NEUTROPHIL_DN                                                      | 191 | 0.3485842  | 1.618.701  | 0.001355013 | 0.001784296 | 0.885 |
| GSE1925_CTRL_VS_IFNG_PRIMED_MACROPHAGE_3H_IFNG_STIM_DN                                   | 121 | 0.3732342  | 16.179.277 | 0.0         | 0.001805633 | 0.887 |
| GSE3982_NEUTROPHIL_VS_EFF_MEMORY_CD4_TCELL_UP                                            | 195 | 0.34878805 | 16.176.957 | 0.0         | 0.001810023 | 0.887 |
| GSE25123_CTRL_VS_IL4_STIM_MACROPHAGE_UP                                                  | 189 | 0.3539607  | 16.173.124 | 0.0         | 0.001823690 | 0.89  |
| GSE27670_CTRL_VS_BLIIMP1_TRANSDUCE_GC_BCELL_UP                                           | 193 | 0.35278708 | 16.171.435 | 0.0         | 0.001828922 | 0.89  |
| GSE15330_HSC_VS_LYMPHOID_PRIMED_MULTIPOTENT_PROGENITOR_UP                                | 196 | 0.345721   | 1.616.142  | 0.0         | 0.001873750 | 0.895 |
| GSE360_T_GONDII_VS_M_TUBERCULOSIS_MAC_DN                                                 | 192 | 0.35315332 | 16.152.806 | 0.0         | 0.001896606 | 0.899 |
| GSE7852_LN_VS_THYMUS_TCONV_UP                                                            | 193 | 0.35093975 | 16.150.917 | 0.001342281 | 0.001900921 | 0.9   |
| GSE39110_UNTREATED_VS_IL2_TREATED_CD8_TCELL_DAY3_POST_IMMUNIZATION_UP                    | 193 | 0.35253635 | 16.147.166 | 0.0         | 0.001909387 | 0.901 |
| GSE10239_KLRG1INT_VS_KLRG1HIGH_EFF_CD8_TCELL_DN                                          | 191 | 0.35091335 | 16.144.522 | 0.0         | 0.001911131 | 0.901 |
| GSE45881_CXCR6HI_VS_CXCR1LO_COLONIC_LAMINA_PROPRIA_DN                                    | 196 | 0.34656873 | 16.142.142 | 0.0         | 0.001912019 | 0.901 |
| GSE2706_2H_VS_8H_R848_STIM_DC_UP                                                         | 182 | 0.3571854  | 16.139.671 | 0.0         | 0.001922964 | 0.903 |
| GSE37533_UNTREATED_VS_PIOGLITAZONE_TREATED_CD4_TCELL_PPARG1_AND_FOXP3_TRANSDUCE_DN       | 197 | 0.35061058 | 16.129.911 | 0.0         | 0.001954066 | 0.907 |
| GSE5589_LPS_AND_IL10_VS_LPS_AND_IL6_STIM_MACROPHAGE_45MIN_DN                             | 192 | 0.34713382 | 16.111.295 | 0.001283697 | 0.002009404 | 0.911 |
| GSE17721_POLYIC_VS_CPG_8H_BMDM_UP                                                        | 193 | 0.34734952 | 16.096.869 | 0.0         | 0.002061248 | 0.918 |
| GSE16385_ROSIGLITAZONE_IL4_VS_ROSIGLITAZONE_ALONE_STIM_MACROPHAGE_UP                     | 187 | 0.3487724  | 16.085.727 | 0.0         | 0.002095382 | 0.92  |
| GSE19825_NAIVE_VS_DAY3_EFF_CD8_TCELL_UP                                                  | 195 | 0.34952545 | 16.085.752 | 0.001317523 | 0.002097162 | 0.92  |
| GSE16450_CTRL_VS_IFNA_6H_STIM_IMMATURE_NEURON_CELL_LINE_UP                               | 191 | 0.34827378 | 16.081.786 | 0.0         | 0.002107805 | 0.92  |
| GSE42088_UNINF_VS_LEISHMANIA_INF_DC_8H_UP                                                | 197 | 0.35006207 | 16.078.002 | 0.002557544 | 0.002123556 | 0.926 |
| GSE3920_UNTREATED_VS_IFNA_TREATED_FIBROBLAST_UP                                          | 164 | 0.35651258 | 16.072.294 | 0.0         | 0.002140159 | 0.926 |
| GSE9650_NAIVE_VS_EXHAUSTED_CD8_TCELL_DN                                                  | 191 | 0.3460081  | 16.069.622 | 0.001326259 | 0.002152523 | 0.927 |
| GSE43955_TGFB_IL6_VS_TGFB_IL6_IL23_TH17_ACT_CD4_TCELL_60H_DN                             | 194 | 0.3479365  | 16.065.005 | 0.0         | 0.002167467 | 0.928 |
| GSE17301_IFNA2_VS_IFNA2_AND_ACD3_ACD28_STIM_CD8_TCELL_UP                                 | 197 | 0.3488795  | 16.061.252 | 0.001285347 | 0.002178995 | 0.93  |
| GSE27291_6H_VS_7D_STIM_GAMMADELTA_TCELL_DN                                               | 169 | 0.35483328 | 16.056.001 | 0.001328021 | 0.002198591 | 0.931 |
| GSE13306_RA_VS_UNTREATED_TREG_DN                                                         | 188 | 0.3512316  | 16.056.429 | 0.0         | 0.002198782 | 0.931 |
| GSE339_CD8POS_VS_CD4CD8DN_DC_DN                                                          | 197 | 0.34633565 | 16.055.293 | 0.0         | 0.002200045 | 0.931 |
| GSE25123_ROSIGLITAZONE_VS_IL4_AND_ROSIGLITAZONE_STIM_PPARG_KO_MACROPHAGE_DAY10_DN        | 188 | 0.34788102 | 16.053.026 | 0.0         | 0.002204828 | 0.931 |
| GSE21063_CTRL_VS_ANTI_IGM_STIM_BCELL_NFATC1_KO_3H_DN                                     | 179 | 0.35016412 | 16.051.372 | 0.0         | 0.002212967 | 0.932 |
| GSE7509_DC_VS_MONOCYTE_DN                                                                | 193 | 0.34619808 | 16.050.166 | 0.0         | 0.002213381 | 0.932 |
| GSE29949_MICROGLIA_VS_DC_BRAIN_DN                                                        | 193 | 0.34989187 | 16.050.909 | 0.001329787 | 0.002213589 | 0.932 |
| GSE22886_DC_VS_MONOCYTE_UP                                                               | 195 | 0.34942615 | 16.047.834 | 0.001324503 | 0.002222257 | 0.934 |
| GSE6681_DELETED_FOXP3_VS_WT_TREG_UP                                                      | 188 | 0.34937862 | 16.041.328 | 0.0         | 0.002247620 | 0.937 |
| GSE44649_WT_VS_MIR155_KO_ACTIVATED_CD8_TCELL_UP                                          | 189 | 0.3477387  | 16.038     | 0.001353179 | 0.002255683 | 0.938 |
| GSE13522_CTRL_VS_T_CRUZI_BRAZIL_STRAIN_INF_SKIN_DN                                       | 193 | 0.34561995 | 16.036.763 | 0.0         | 0.002261252 | 0.939 |
| GSE23505_IL6_IL1_IL23_VS_IL6_IL1_TGFB_TREATED_CD4_TCELL_UP                               | 195 | 0.34500614 | 16.035.691 | 0.0         | 0.002262647 | 0.939 |
| GSE33424_CD161_HIGH_VS_INT_CD8_TCELL_DN                                                  | 192 | 0.34482026 | 16.032.602 | 0.0         | 0.002270410 | 0.941 |
| GSE3920_UNTREATED_VS_IFNG_TREATED_ENDOTHELIAL_CELL_UP                                    | 148 | 0.35975635 | 16.033.025 | 0.001366120 | 0.002270660 | 0.94  |
| GSE13738_RESTING_VS_BYSTANDER_ACTIVATED_CD4_TCELL_DN                                     | 189 | 0.35040408 | 16.025.746 | 0.0         | 0.002294494 | 0.943 |
| GSE5589_UNSTIM_VS_45MIN_LPS_AND_IL6_STIM_MACROPHAGE_UP                                   | 192 | 0.3464629  | 16.026.098 | 0.001362397 | 0.002294746 | 0.943 |
| GSE9509_LPS_VS_LPS_AND_IL10_STIM_IL10_KO_MACROPHAGE_30MIN_DN                             | 185 | 0.35161808 | 16.023.326 | 0.001293661 | 0.002296431 | 0.943 |
| GSE13547_WT_VS_ZFX_KO_BCELL_ANTI_IGM_STIM_12H_DN                                         | 142 | 0.36096635 | 16.023.682 | 0.0         | 0.002297518 | 0.943 |
| GSE20727_H2O2_VS_ROS_INHIBITOR_TREATED_DC_UP                                             | 189 | 0.3481701  | 16.022.563 | 0.001356852 | 0.002301067 | 0.943 |
| GSE6674_UNSTIM_VS_ANTI_IGM_STIM_BCELL_DN                                                 | 121 | 0.37079442 | 16.013.771 | 0.004166667 | 0.002337633 | 0.945 |
| GSE7460_CTRL_VS_TGFB_TREATED_ACT_TCONV_DN                                                | 194 | 0.34491625 | 16.009.536 | 0.002567394 | 0.002349595 | 0.946 |
| GSE5542_IFNG_VS_IFNA_TREATED_EPITHELIAL_CELLS_24H_DN                                     | 193 | 0.34974867 | 16.006.942 | 0.001297016 | 0.002353385 | 0.946 |
| GSE43955_10H_VS_30H_ACT_CD4_TCELL_UP                                                     | 195 | 0.34443077 | 16.006.509 | 0.0         | 0.002353877 | 0.946 |
| GSE25677_R848_VS_MPL_AND_R848_STIM_BCELL_DN                                              | 158 | 0.35200948 | 16.001.441 | 0.0         | 0.002369873 | 0.946 |
| GSE19888_CTRL_VS_TCELL_MEMBRANES_ACT_MAST_CELL_PRETREAT_A3R_INH_UP                       | 194 | 0.3465387  | 16.000.339 | 0.001338688 | 0.002371169 | 0.946 |
| GSE36476_YOUNG_VS_OLD_DONOR_MEMORY_CD4_TCELL_40H_TSST_ACT_UP                             | 189 | 0.34918168 | 15.998.888 | 0.0         | 0.002377355 | 0.948 |
| GSE30153_LUPUS_VS_HEALTHY_DONOR_BCELL_UP                                                 | 193 | 0.34516436 | 1.599.703  | 0.002617801 | 0.002379114 | 0.948 |
| GSE5589_LPS_VS_LPS_AND_IL6_STIM_MACROPHAGE_45MIN_UP                                      | 196 | 0.34614512 | 15.997.669 | 0.001308900 | 0.002379462 | 0.948 |
| GSE17186_NAIVE_VS_CD21HIGH_TRANSITIONAL_BCELL_UP                                         | 186 | 0.35144505 | 15.996.317 | 0.0         | 0.002381204 | 0.948 |
| GSE15930_NAIVE_VS_48H_IN_VITRO_STIM_CD8_TCELL_UP                                         | 194 | 0.35093868 | 15.988.144 | 0.001287001 | 0.002412505 | 0.949 |
| GSE11961_FOLLICULAR_BCELL_VS_MEMORY_BCELL_DAY40_DN                                       | 195 | 0.3469959  | 15.984.579 | 0.0         | 0.002428352 | 0.95  |
| GSE28737_FOLLICULAR_VS_MARGINAL_ZONE_BCELL_BCL6_HET_DN                                   | 191 | 0.34621057 | 15.974.807 | 0.001272264 | 0.002475781 | 0.954 |
| GSE5679_PPARG_LIGAND_ROSIGLITAZONE_VS_ROSIGLITAZONE_AND_RARA_AGONIST_AM580_TREATED_DC_UP | 192 | 0.34670967 | 15.972.878 | 0.0         | 0.002479788 | 0.954 |
| GSE20366_EX_VIVO_VS_HOMEOSTATIC_CONVERSION_NAIVE_CD4_TCELL_DN                            | 192 | 0.3429698  | 15.973.163 | 0.001326259 | 0.002481014 | 0.954 |
| GSE24142_DN2_VS_DN3_THYMOCYTE_DN                                                         | 198 | 0.34502983 | 15.971.129 | 0.0         | 0.002485849 | 0.954 |
| GSE28130_ACTIVATED_VS_INDUCED_TREG_UP                                                    | 187 | 0.35028222 | 15.969.357 | 0.0         | 0.002490267 | 0.955 |
| KAECH_DAY8_EFF_VS_DAY15_EFF_CD8_TCELL_DN                                                 | 193 | 0.3476966  | 15.967.995 | 0.001410437 | 0.002494676 | 0.955 |
| GSE17186_NAIVE_VS_CD21LOW_TRANSITIONAL_BCELL_DN                                          | 192 | 0.3495704  | 15.966.954 | 0.0         | 0.002499894 | 0.956 |
| GSE30971_CTRL_VS_LPS_STIM_MACROPHAGE_WBP7_KO_2H_UP                                       | 180 | 0.34831885 | 15.966.343 | 0.0         | 0.002500271 | 0.956 |
| GSE15624_CTRL_VS_3H_HALOFUGINONE_TREATED_CD4_TCELL_UP                                    | 153 | 0.35546744 | 15.964.634 | 0.004103967 | 0.002503858 | 0.956 |
| GSE18893_TCONV_VS_TREG_24H_CULTURE_UP                                                    | 195 | 0.34269813 | 15.962.156 | 0.0         | 0.002513095 | 0.958 |
| GSE30971_CTRL_VS_LPS_STIM_MACROPHAGE_WBP7_HET_4H_DN                                      | 186 | 0.34873274 | 15.960.118 | 0.0         | 0.002520712 | 0.958 |
| GSE40274_FOXP3_VS_FOXP3_AND_PBX1_TRANSDUCE_ACTIVATED_CD4_TCELL_DN                        | 196 | 0.3466612  | 15.959.238 | 0.0         | 0.002523489 | 0.958 |
| GSE29164_DAY3_VS_DAY7_CD8_TCELL_AND_IL12_TREATED_MELANOMA_DN                             | 193 | 0.34602258 | 15.957.105 | 0.001298701 | 0.002530273 | 0.959 |
| GSE27859_MACROPHAGE_VS_CD11C_INT_F480_INT_DC_DN                                          | 189 | 0.34402263 | 15.953.035 | 0.001312336 | 0.002546626 | 0.96  |
| GSE15930_STIM_VS_STIM_AND_IFNAB_48H_CD8_TCELL_UP                                         | 193 | 0.34381217 | 15.947.533 | 0.0         | 0.002557562 | 0.961 |
| GSE11057_NAIVE_VS_EFF_MEMORY_CD4_TCELL_UP                                                | 179 | 0.34815958 | 1.594.923  | 0.001322751 | 0.002557707 | 0.96  |
| GSE17186_NAIVE_VS_CD21LOW_TRANSITIONAL_BCELL_CORD_BLOOD_UP                               | 194 | 0.34222394 | 1.594.804  | 0.002604166 | 0.002558837 | 0.961 |
| GSE3982_BCELL_VS_EFF_MEMORY_CD4_TCELL_UP                                                 | 194 | 0.34673136 | 1.594.971  | 0.0         | 0.002558990 | 0.96  |
| GSE39152_CD103_NEG_VS_POS_MEMORY_CD8_TCELL_UP                                            | 200 | 0.34380567 | 1.594.294  | 0.0         | 0.002575499 | 0.963 |
| GSE21670_UNTREATED_VS_TGFB_IL6_TREATED_STAT3_KO_CD4_TCELL_DN                             | 191 | 0.34618032 | 15.942.452 | 0.0         | 0.002576603 | 0.963 |
| GSE36826_NORMAL_VS_STAPH_AUREUS_INF_IL1R_KO_SKIN_UP                                      | 194 | 0.34263337 | 15.935.928 | 0.001315789 | 0.002608829 | 0.965 |
| GSE7460_FOXP3_MUT_VS_HET_ACT_TCONV_UP                                                    | 194 | 0.34840375 | 15.931.174 | 0.002583979 | 0.002629064 | 0.967 |
| GSE3982_DC_VS_MAC_LPS_STIM_DN                                                            | 194 | 0.3427024  | 15.926.788 | 0.0         | 0.002646030 | 0.97  |
| GSE15624_CTRL_VS_6H_HALOFUGINONE_TREATED_CD4_TCELL_UP                                    | 124 | 0.36458236 | 1.592.005  | 0.004037685 | 0.002670895 | 0.972 |
| GSE19198_CTRL_VS_IL21_TREATED_TCELL_1H_DN                                                | 189 | 0.34541893 | 15.912.548 | 0.0         | 0.002698396 | 0.973 |
| GSE360_DC_VS_MAC_L_MAJOR_DN                                                              | 194 | 0.34474364 | 1.591.326  | 0.0         | 0.002698968 | 0.973 |
| GSE29949_CD8_NEG_DC_SPLEEN_VS_DC_BRAIN_DN                                                | 195 | 0.34545377 | 1.590.268  | 0.001328021 | 0.002737435 | 0.974 |
| GSE22601_CD4_SINGLE_POSITIVE_VS_CD8_SINGLE_POSITIVE_THYMOCYTE_DN                         | 197 | 0.3426183  | 1.589.756  | 0.002663115 | 0.002758217 | 0.974 |
| GSE3982_MAC_VS_CENT_MEMORY_CD4_TCELL_UP                                                  | 193 | 0.34044138 | 15.894.479 | 0.0         | 0.002767874 | 0.974 |
| GSE19198_CTRL_VS_IL21_TREATED_TCELL_24H_UP                                               | 196 | 0.3431408  | 15.890.611 | 0.0         | 0.002781501 | 0.974 |

|                                                                                  |     |            |            |             |             |       |
|----------------------------------------------------------------------------------|-----|------------|------------|-------------|-------------|-------|
| GSE3982_DC_VS_BASOPHIL_DN                                                        | 191 | 0.34253913 | 15.887.362 | 0.0         | 0.002786656 | 0.975 |
| GSE24081_CONTROLLER_VS_PROGRESSOR_HIV_SPECIFIC_CD8_TCELL_DN                      | 194 | 0.3469444  | 15.886.465 | 0.0         | 0.002786786 | 0.976 |
| GSE40274_FOXP3_VS_FOXP3_AND_HELIOS_TRANSDUCED_ACTIVATED_CD4_TCELL_UP             | 137 | 0.359893   | 1.588.852  | 0.0         | 0.002787189 | 0.974 |
| GSE40666_WT_VS_STAT1_KO_CD8_TCELL_UP                                             | 195 | 0.34186572 | 15.887.688 | 0.002604166 | 0.002788106 | 0.975 |
| GSE22229_RENAL_TRANSPLANT_VS_HEALTHY_PBMCDN                                      | 188 | 0.34844574 | 15.883.076 | 0.0         | 0.002793482 | 0.977 |
| GSE22886_UNSTIM_VS_STIM_MEMORY_TCELL_UP                                          | 188 | 0.34760356 | 1.588.522  | 0.0         | 0.002794013 | 0.976 |
| GSE15930_STIM_VS_STIM_AND_IFNAB_48H_CD8_T_CELL_DN                                | 196 | 0.34523344 | 15.883.431 | 0.001358695 | 0.002795715 | 0.977 |
| GSE10239_MEMORY_VS_DAY4.5_EFF_CD8_TCELL_UP                                       | 191 | 0.34445694 | 15.870.929 | 0.001275510 | 0.002858829 | 0.98  |
| GSE14699_NAIVE_VS_DELETIONAL_TOLERANCE_CD8_TCELL_UP                              | 146 | 0.35617912 | 15.869.333 | 0.001396648 | 0.002862179 | 0.981 |
| GSE15930_NAIVE_VS_24H_IN_VITRO_STIM_IL12_CD8_TCELL_UP                            | 198 | 0.3434552  | 15.870.132 | 0.001300390 | 0.002863602 | 0.981 |
| GSE29949_MICROGLIA_BRAIN_VS_MONOCYTE_BONE_MARROW_DN                              | 193 | 0.34139407 | 15.869.561 | 0.0         | 0.002864460 | 0.981 |
| GSE46606_UNSTIM_VS_CD40L_IL2_IL5_1DAY_STIMULATED_IRF4HIGH_SORTED_BCELL_DN        | 189 | 0.34557897 | 1.586.406  | 0.0         | 0.002885758 | 0.982 |
| GSE39916_B_CELL_SPLEEN_VS_PLASMA_CELL_BONE_MARROW_UP                             | 193 | 0.34072027 | 15.856.742 | 0.0         | 0.002915479 | 0.982 |
| GSE3982_DC_VS_NKCELL_UP                                                          | 195 | 0.34134042 | 15.851.426 | 0.0         | 0.002936647 | 0.982 |
| GSE2770_UNTREATED_VS_TGFB_AND_IL4_TREATED_ACT_CD4_TCELL_4H_UP                    | 191 | 0.34510297 | 15.851.563 | 0.001317523 | 0.002938979 | 0.982 |
| GSE1460_INTRATHYMIC_T_PROGENITOR_VS_NAIVE_CD4_TCELL_CORD_BLOOD_DN                | 195 | 0.34158763 | 15.846.312 | 0.0         | 0.002956956 | 0.984 |
| GSE32986_GMCSF_VS_GMCSF_AND_CURDLAN_HIGHDOSE_STIM_DC_UP                          | 189 | 0.34450245 | 15.846.552 | 0.0         | 0.002957752 | 0.983 |
| GSE4748_CTRL_VS_LPS_STIM_DC_3H_UP                                                | 195 | 0.3374475  | 15.843.765 | 0.001335113 | 0.002966317 | 0.984 |
| GSE39152_SPLEEN_CD103_NEG_VS_BRAIN_CD103_POS_MEMORY_CD8_TCELL_UP                 | 196 | 0.34423637 | 15.839.905 | 0.0         | 0.002987394 | 0.986 |
| GSE46606_IRF4HIGH_VS_IRF4MID_CD40L_IL2_IL5_DAY1_STIMULATED_BCELL_DN              | 190 | 0.34651187 | 15.835.654 | 0.0         | 0.003006083 | 0.988 |
| GSE17974_IL4_AND_ANTI_IL12_VS_UNTREATED_4H_ACT_CD4_TCELL_UP                      | 176 | 0.34633934 | 15.831.066 | 0.0         | 0.003016913 | 0.989 |
| GSE40666_WT_VS_STAT4_KO_CD8_TCELL_UP                                             | 164 | 0.353029   | 15.831.383 | 0.002695417 | 0.003017725 | 0.989 |
| GSE21927_EL4_VS_MCA203_TUMOR_MONOCYTES_UP                                        | 157 | 0.35030708 | 15.826.476 | 0.0         | 0.003033198 | 0.989 |
| GSE11961_FOLLICULAR_BCELL_VS_MEMORY_BCELL_DAY7_UP                                | 193 | 0.3400685  | 15.819.852 | 0.0         | 0.003051818 | 0.989 |
| GSE37532_WT_VS_PPARG_KO_LN_TREG_DN                                               | 116 | 0.36228654 | 15.818.926 | 0.0         | 0.00305562  | 0.989 |
| GSE34217_MIR17_92_OVEREXPRESS_VS_WT_ACT_CD8_TCELL_UP                             | 130 | 0.35801315 | 1.581.736  | 0.002758620 | 0.003064835 | 0.989 |
| GSE43955_10H_VS_60H_ACT_CD4_TCELL_WITH_TGFB_IL6_DN                               | 196 | 0.33946717 | 1.581.625  | 0.002621232 | 0.003067076 | 0.989 |
| GSE10239_NAIVE_VS_KLRG1INT_EFF_CD8_TCELL_UP                                      | 191 | 0.34263897 | 15.814.158 | 0.001340482 | 0.003075530 | 0.989 |
| GSE45365_NK_CELL_VS_CD8_TCELL_MCMV_INFECTION_UP                                  | 194 | 0.34114242 | 1.580.914  | 0.0         | 0.003100906 | 0.989 |
| GSE40273_EOS_KO_VS_WT_TREG_DN                                                    | 190 | 0.34431887 | 15.808.694 | 0.0         | 0.003103115 | 0.989 |
| GSE36078_UNTREATED_VS_AD5_INF_MOUSE_LUNG_DC_UP                                   | 193 | 0.34519488 | 15.806.487 | 0.0         | 0.003113774 | 0.989 |
| GSE1432_CTRL_VS_IFNG_24H_MICROGLIA_UP                                            | 197 | 0.3404425  | 15.799.831 | 0.0         | 0.003145901 | 0.99  |
| GSE3920_IFNA_VS_IFNB_TREATED_ENDOTHELIAL_CELL_UP                                 | 164 | 0.35138398 | 15.800.406 | 0.0         | 0.003146802 | 0.99  |
| GSE15930_STIM_VS_STIM_AND_IL12_48H_CD8_T_CELL_DN                                 | 198 | 0.34524783 | 15.797.294 | 0.0         | 0.003148820 | 0.99  |
| GSE24142_DN2_VS_DN3_THYMOCTE_ADULT_UP                                            | 194 | 0.34335655 | 15.794.028 | 0.0         | 0.003162499 | 0.99  |
| GSE15930_STIM_VS_STIM_AND_TRICHOSTATINA_48H_CD8_T_CELL_UP                        | 195 | 0.34048384 | 15.790.774 | 0.002677376 | 0.003172346 | 0.99  |
| GSE24142_EARLY_THYMIC_PROGENITOR_VS_DN2_THYMOCTE_ADULT_DN                        | 195 | 0.34627804 | 15.788.662 | 0.001349527 | 0.003179882 | 0.99  |
| GSE28449_WT_VS_LRF_KO_GERMINAL_CENTER_BCELL_UP                                   | 194 | 0.33956656 | 15.786.114 | 0.0         | 0.003188925 | 0.99  |
| GSE22886_CD8_VS_CD4_NAIVE_TCELL_DN                                               | 181 | 0.34873077 | 15.784.817 | 0.0         | 0.003194104 | 0.99  |
| GSE33292_WT_VS_TCF1_KO_DN3_THYMOCTE_UP                                           | 193 | 0.34102398 | 15.783.433 | 0.001312336 | 0.003200823 | 0.99  |
| GSE360_CTRL_VS_L_DONOVANI_DC_UP                                                  | 194 | 0.3419422  | 15.780.892 | 0.001295336 | 0.003220565 | 0.99  |
| GSE17721_PAM3CSK4_VS_GADIQUIMOD_1H_BMDM_UP                                       | 194 | 0.34362662 | 15.779.784 | 0.0         | 0.003224215 | 0.99  |
| GSE22501_PERIPHERAL_BLOOD_VS_CORD_BLOOD_TREG_DN                                  | 193 | 0.34016457 | 15.772.896 | 0.001340482 | 0.003266089 | 0.991 |
| GSE5679_CTRL_VS_PPARG_LIGAND_ROSIGLITAZONE_AND_RARA_AGNONIST_AM580_TREATED_DC_UP | 196 | 0.3375948  | 15.771.693 | 0.002607561 | 0.003267129 | 0.991 |
| GSE9239_CTRL_VS_TNF_INHIBITOR_TREATED_DC_UP                                      | 189 | 0.34388322 | 15.771.902 | 0.001302083 | 0.003268136 | 0.991 |
| GSE16385_ROSIGLITAZONE_VS_UNTREATED_IFNG_TNF_STIM_MACROPHAGE_UP                  | 191 | 0.34123605 | 15.765.676 | 0.001336898 | 0.003292076 | 0.992 |
| GSE46242_TH1_VS_ANERGIC_TH1_CD4_TCELL_WITH_EGR2_DELETED_DN                       | 181 | 0.34433472 | 15.760.536 | 0.002614379 | 0.003314738 | 0.992 |
| GSE3982_MAC_VS_TH2_UP                                                            | 193 | 0.342497   | 15.760.177 | 0.0         | 0.003315219 | 0.992 |
| GSE29949_CD8_NEG_DC_SPLEEN_VS_MONOCYTE_BONE_MARROW_DN                            | 192 | 0.3407196  | 15.758.944 | 0.001290322 | 0.003322518 | 0.992 |
| GSE19923_WT_VS_HEB_AND_E2A_KO_DP_THYMOCTE_DN                                     | 197 | 0.33956683 | 1.575.263  | 0.0         | 0.003352393 | 0.993 |
| GSE360_HIGH_DOSE_B_MALAYI_VS_M_TUBERCULOSIS_MAC_UP                               | 196 | 0.3400883  | 1.575.325  | 0.001335113 | 0.003354217 | 0.993 |
| GSE27859_MACROPHAGE_VS_DC_DN                                                     | 180 | 0.34396276 | 15.748.478 | 0.003916449 | 0.003374880 | 0.993 |
| GSE2770_TGFB_AND_IL4_ACT_VS_ACT_CD4_TCELL_48H_UP                                 | 190 | 0.34329855 | 15.747.035 | 0.0         | 0.003382898 | 0.993 |
| GSE23925_DARK_ZONE_VS_NAIVE_BCELL_DN                                             | 190 | 0.33927464 | 15.738.373 | 0.002567394 | 0.003430328 | 0.993 |
| GSE17721_ALL_VS_24H_PAM3CSK4_BMDM_DN                                             | 195 | 0.34064102 | 15.734.439 | 0.0         | 0.003454201 | 0.994 |
| GSE46606_IRF4_KO_VS_WT_CD40L_IL2_IL5_3DAY_STIMULATED_BCELL_DN                    | 176 | 0.34277073 | 15.729.634 | 0.001342281 | 0.003475050 | 0.994 |
| GSE40277_GATA1_AND_SATB1_TRANSDUCED_VS_CTRL_CD4_TCELL_UP                         | 192 | 0.34534287 | 15.716.683 | 0.002635046 | 0.003546407 | 0.995 |
| GSE17812_WT_VS_THPOK_KO_MEMORY_CD8_TCELL_UP                                      | 193 | 0.33990866 | 15.713.702 | 0.0         | 0.003564882 | 0.995 |
| GSE29949_MICROGLIA_BRAIN_VS_CD8_NEG_DC_SPLEEN_UP                                 | 191 | 0.3413825  | 15.713.546 | 0.002656042 | 0.003565162 | 0.995 |
| GSE27859_CD11C_INT_F480_HI_MACROPHAGE_VS_CD11C_ING_F480_INT_DC_DN                | 197 | 0.33921948 | 15.699.208 | 0.0         | 0.003648512 | 0.995 |
| GSE5589_WT_VS_IL6_KO_LPS_AND_IL6_STIM_MACROPHAGE_45MIN_DN                        | 196 | 0.33990857 | 15.695.602 | 0.002624672 | 0.003665275 | 0.995 |
| GSE17974_IL4_AND_ANTI_IL12_VS_UNTREATED_6H_ACT_CD4_TCELL_DN                      | 182 | 0.3455515  | 15.694.985 | 0.0         | 0.003669252 | 0.995 |
| GSE27896_HDAC6_KO_VS_WT_TREG_UP                                                  | 164 | 0.34509024 | 15.693.444 | 0.0         | 0.003674728 | 0.995 |
| GSE6269_HEALTHY_VS_STREP_PNEUMO_INF_PBMCDN                                       | 168 | 0.3438416  | 15.689.175 | 0.002621232 | 0.003697526 | 0.995 |
| GSE21360_NAIVE_VS_QUATERNARY_MEMORY_CD8_TCELL_DN                                 | 194 | 0.3407894  | 15.686.959 | 0.002699055 | 0.003709769 | 0.995 |
| GSE360_L_DONOVANI_VS_T_GONDII_DC_UP                                              | 195 | 0.34035155 | 15.686.349 | 0.0         | 0.003712187 | 0.995 |
| GSE23321_CENTRAL_MEMORY_VS_NAIVE_CD8_TCELL_UP                                    | 195 | 0.33686668 | 15.685.987 | 0.002635046 | 0.003713136 | 0.995 |
| GSE42724_NAIVE_VS_MEMORY_BCELL_UP                                                | 191 | 0.3413594  | 1.568.375  | 0.001315789 | 0.003721573 | 0.995 |
| GSE19401_UNSTIM_VS_RETINOIC_ACID_AND_PAM2CSK4_STIM_FOLLICULAR_DC_UP              | 199 | 0.3386506  | 15.677.438 | 0.0         | 0.003763093 | 0.995 |
| GSE12003_MIR223_KO_VS_WT_BM_PROGENITOR_4D_CULTURE_UP                             | 192 | 0.339817   | 15.675.604 | 0.0         | 0.003769964 | 0.995 |
| GSE17721_POLYIC_VS_GADIQUIMOD_24H_BMDM_UP                                        | 191 | 0.33601508 | 15.672.468 | 0.0         | 0.003788112 | 0.995 |
| GSE22342_CD11C_HIGH_VS_LOW_DECIDUAL_MACROPHAGES_DN                               | 176 | 0.34451142 | 156.713    | 0.001312336 | 0.003788974 | 0.995 |
| GSE40666_NAIVE_VS_EFFECTOR_CD8_TCELL_DN                                          | 191 | 0.33978423 | 15.665.144 | 0.0         | 0.003824961 | 0.996 |
| GSE10325_BCELL_VS_LUPUS_BCELL_DN                                                 | 194 | 0.3408614  | 15.658.257 | 0.0         | 0.003857252 | 0.996 |
| GSE17580_TREG_VS_TEFF_DN                                                         | 196 | 0.33829597 | 15.655.484 | 0.0         | 0.003864892 | 0.996 |
| GSE2706_UNSTIM_VS_8H_R848_DC_UP                                                  | 178 | 0.34192836 | 15.656.141 | 0.001377410 | 0.003866284 | 0.996 |
| GSE36009_WT_VS_NLRP10_KO_DC_UP                                                   | 193 | 0.33665067 | 156.559    | 0.001373626 | 0.003866328 | 0.996 |
| GSE2585_CTEC_VS_THYMIC_MACROPHAGE_UP                                             | 191 | 0.33682868 | 15.644.792 | 0.001275510 | 0.003913456 | 0.996 |
| GSE42724_MEMORY_BCELL_VS_PLASMABLAST_UP                                          | 192 | 0.33888823 | 15.644.804 | 0.001248439 | 0.003916412 | 0.996 |
| GSE13306_RA_VS_UNTREATED_TCONV_DN                                                | 195 | 0.33679056 | 15.643.584 | 0.0         | 0.003916491 | 0.996 |
| GSE13946_CTRL_VS_DSS_COLITIS_GD_TCELL_FROM_COLON_DN                              | 168 | 0.3395698  | 15.645.474 | 0.002695417 | 0.003917883 | 0.996 |
| GSE46242_CTRL_VS_EGR2_DELETED_TH1_CD4_TCELL_DN                                   | 176 | 0.34333068 | 15.642.713 | 0.001351351 | 0.003920204 | 0.996 |
| GSE17580_UNINFECTED_VS_S_MANSONI_INF_TEFF_UP                                     | 198 | 0.33637893 | 15.637.189 | 0.002645502 | 0.00395138  | 0.996 |
| GSE26030_UNSTIM_VS_RESTIM_TH1_DAYS_POST_POLARIZATION_DN                          | 192 | 0.33946875 | 15.632.718 | 0.001335113 | 0.003981760 | 0.996 |
| GSE24142_ADULT_VS_FETAL_DN3_THYMOCTE_DN                                          | 195 | 0.33779904 | 15.630.193 | 0.0         | 0.003995842 | 0.997 |
| GSE32034_UNTREATED_VS_ROSIGLITAZONE_TREATED_LY6C_LOW_MONOCYTE_DN                 | 180 | 0.33717936 | 15.620.286 | 0.001302083 | 0.004054915 | 0.997 |
| GSE41867_NAIVE_VS_DAY8_LCMV_EFFECTOR_CD8_TCELL_DN                                | 194 | 0.33599475 | 15.620.484 | 0.002597402 | 0.004057219 | 0.997 |
| GSE24142_ADULT_VS_FETAL_DN3_THYMOCTE_UP                                          | 193 | 0.3329433  | 15.618.063 | 0.0         | 0.004068089 | 0.997 |
| GSE22432_MULTIPOTENT_VS_COMMON_DC_PROGENITOR_DN                                  | 191 | 0.3401789  | 15.615.429 | 0.0         | 0.004076109 | 0.997 |

|                                                                                   |     |            |            |             |              |       |
|-----------------------------------------------------------------------------------|-----|------------|------------|-------------|--------------|-------|
| GSE360_L_DONOVANI_VS_L_MAJOR_MAC_DN                                               | 192 | 0.3352325  | 15.610.193 | 0.0         | 0.004121845  | 0.997 |
| GSE36392_TYPE_2_MYELOID_VS_MAC_IL25_TREATED_LUNG_UP                               | 190 | 0.33779487 | 15.607.305 | 0.001300390 | 0.004134106  | 0.997 |
| GSE2770_UNTREATED_VS_TGFB_AND_IL4_TREATED_ACT_CD4_TCELL_48H_UP                    | 151 | 0.34523672 | 15.607.319 | 0.001360544 | 0.004137200  | 0.997 |
| GSE37301_HEMATOPOIETIC_STEM_CELL_VS_GRAN_MONO_PROGENITOR_UP                       | 151 | 0.3480813  | 15.604.222 | 0.004054054 | 0.004155290  | 0.997 |
| GSE22886_NAIVE_TCELL_VS_NKCELL_DN                                                 | 190 | 0.33960545 | 15.603.274 | 0.001322751 | 0.004158049  | 0.997 |
| GSE36078_WT_VS_IL1R_KO_LUNG_DC_UP                                                 | 192 | 0.33692503 | 15.601.245 | 0.001356852 | 0.004168196  | 0.997 |
| GSE6674_ANTI_IGM_VS_CPG_STIM_BCELL_UP                                             | 188 | 0.33808511 | 15.596.642 | 0.001321004 | 0.004188466  | 0.997 |
| GSE22935_24H_VS_48H_MBOVIS_BCG_STIM_MACROPHAGE_UP                                 | 190 | 0.33869803 | 15.596.839 | 0.001342281 | 0.004191589  | 0.997 |
| GSE26928_CENTR_MEMORY_VS_CXCR5_POS_CD4_TCELL_UP                                   | 174 | 0.34234992 | 15.593.101 | 0.001329787 | 0.004209552  | 0.997 |
| GSE17974_CTRL_VS_ACT_IL4_AND_ANTI_IL12_0.5H_CD4_TCELL_UP                          | 155 | 0.3457776  | 1.558.723  | 0.001375515 | 0.004239499  | 0.997 |
| GSE21927_UNTREATED_VS_GMCSF_IL6_TREATED_BONE_MARROW_DN                            | 167 | 0.3422662  | 15.574.414 | 0.005305039 | 0.004328803  | 0.998 |
| GSE17301_IFNA2_VS_IFNA5_STIM_ACD3_ACD28_ACT_CD8_TCELL_UP                          | 190 | 0.33643758 | 15.572.208 | 0.0         | 0.004338465  | 0.998 |
| GSE8685_IL2_ACT_IL2_STARVED_VS_IL21_ACT_IL2_STARVED_CD4_TCELL_DN                  | 137 | 0.34830588 | 15.572.623 | 0.0         | 0.004339501  | 0.998 |
| GSE37605_FOXP3_FUSION_GFP_VS_IRES_GFP_TREG_C57BL6_UP                              | 181 | 0.3386235  | 1.557.044  | 0.0         | 0.004349149  | 0.998 |
| GSE25085_FETAL_BM_VS_ADULT_BM_SP4_THYMIC_IMPLANT_DN                               | 190 | 0.34069088 | 15.567.172 | 0.002590673 | 0.004364167  | 0.998 |
| GSE6259_FLT3L_INDUCED_DEC205_POS_DC_VS_BCELL_UP                                   | 146 | 0.3498688  | 15.555.258 | 0.002762431 | 0.004444048  | 0.998 |
| GSE411_100MIN_VS_400MIN_IL6_STIM_SOCS3_KO_MACROPHAGE_DN                           | 187 | 0.33765984 | 15.553.545 | 0.001319261 | 0.004453176  | 0.998 |
| GSE29949_MICROGLIA_BRAIN_VS_CD8_POS_DC_SPLEEN_DN                                  | 194 | 0.33374465 | 15.548.772 | 0.001275510 | 0.004484721  | 0.998 |
| GSE17974_IL4_AND_ANTI_IL12_VS_UNTREATED_6H_ACT_CD4_TCELL_UP                       | 166 | 0.34622177 | 15.548.828 | 0.001347708 | 0.004488035  | 0.998 |
| GSE13522_CTRL_VS_T_CRUZI_G_STRAIN_INF_SKIN_DN                                     | 127 | 0.35507566 | 15.548.882 | 0.001377410 | 0.004490624  | 0.998 |
| GSE13411_NAIVE_VS_MEMORY_BCELL_UP                                                 | 184 | 0.34177387 | 15.545.552 | 0.001371742 | 0.004497713  | 0.998 |
| GSE2770_TGFB_AND_IL4_VS_IL4_TREATED_ACT_CD4_TCELL_2H_UP                           | 189 | 0.33795372 | 15.545.808 | 0.0         | 0.004498137  | 0.998 |
| GSE1460_CD4_THYMOCYTE_VS_NAIVE_CD4_TCELL_ADULT_BLOOD_DN                           | 193 | 0.3338163  | 15.544.679 | 0.001317523 | 0.004498755  | 0.998 |
| GSE39556_UNTREATED_VS_3H_POLYIC_INJ_MOUSE_NK_CELL_UP                              | 197 | 0.33486044 | 1.553.814  | 0.0         | 0.004540433  | 0.998 |
| GSE2585_CTEC_VS_THYMIC_DC_DN                                                      | 195 | 0.33770105 | 15.526.891 | 0.0         | 0.004615566  | 0.998 |
| GSE12845_NAIVE_VS_DARKZONE_GC_TONSIL_BCELL_UP                                     | 191 | 0.33509213 | 15.527.095 | 0.001338688 | 0.004616804  | 0.998 |
| GSE17721_LPS_VS_POLYIC_2H_BMDM_UP                                                 | 198 | 0.33740962 | 1.552.219  | 0.001290322 | 0.004644971  | 0.998 |
| GSE32034_LY6C_HIGH_VS_LOW_ROSIGLITAZONE_TREATED_MONOCYTE_UP                       | 197 | 0.33429846 | 15.522.408 | 0.0         | 0.004648383  | 0.998 |
| GSE40441_NRP1_POS_INDUCED_TREG_VS_NRP1_NEG_NATURAL_TREG_UP                        | 195 | 0.33289632 | 15.518.157 | 0.001329787 | 0.004672683  | 0.998 |
| GSE17974_IL4_AND_ANTI_IL12_VS_UNTREATED_2H_ACT_CD4_TCELL_DN                       | 164 | 0.3467326  | 15.516.125 | 0.002728513 | 0.004686623  | 0.998 |
| GSE411_WT_VS_SOCS3_KO_MACROPHAGE_IL6_STIM_400MIN_UP                               | 190 | 0.33836353 | 15.505.155 | 0.0         | 0.004766128  | 0.998 |
| GSE17721_CTRL_VS_CPG_2H_BMDM_DN                                                   | 192 | 0.33418867 | 15.498.888 | 0.001342281 | 0.004795271  | 0.999 |
| GSE11057_CD4_EFF_MEM_VS_PBMUC_UP                                                  | 190 | 0.3357006  | 15.499.333 | 0.0         | 0.004796612  | 0.999 |
| GSE6259_BCELL_VS_CD8_TCELL_UP                                                     | 179 | 0.34208    | 15.497.301 | 0.003926701 | 0.00480255   | 0.999 |
| GSE41176_UNSTIM_VS_ANTI_IGM_STIM_BCELL_3H_DN                                      | 190 | 0.33668894 | 1.549.365  | 0.001317523 | 0.004829939  | 0.999 |
| GSE32423_MEMORY_VS_NAIVE_CD8_TCELL_UP                                             | 195 | 0.33967847 | 15.491.004 | 0.0         | 0.004845890  | 0.999 |
| GSE3982_MAC_VS_NKCELL_UP                                                          | 195 | 0.33284542 | 15.490.136 | 0.003994674 | 0.004848819  | 0.999 |
| GSE7460_FOXP3_MUT_VS_WT_ACT_WITH_TGFB_TCONV_DN                                    | 194 | 0.338449   | 15.489.883 | 0.001340482 | 0.004851009  | 0.999 |
| GSE21927_SPLEEN_MONOCYTE_VS_GMCSF_GCSF_BONE_MARROW_DN                             | 185 | 0.3386532  | 15.486.584 | 0.004016064 | 0.004873276  | 0.999 |
| GSE5589_LPS_VS_LPS_AND_IL10_STIM_IL6_KO_MACROPHAGE_45MIN_DN                       | 193 | 0.33420518 | 15.485.072 | 0.002724795 | 0.004878359  | 0.999 |
| GSE17721_ALL_VS_24H_PAM3CSK4_BMDM_UP                                              | 192 | 0.3334293  | 15.484.521 | 0.002607561 | 0.004881255  | 0.999 |
| GSE360_L_MAJOR_VS_B_MALAYI_LOW_DOSE_DC_UP                                         | 197 | 0.33663023 | 154.833    | 0.002607561 | 0.004886293  | 0.999 |
| GSE36888_UNTREATED_VS_IL2_TREATED_TCELL_2H_UP                                     | 183 | 0.3382634  | 15.483.111 | 0.0         | 0.004886344  | 0.999 |
| GSE36888_UNTREATED_VS_IL2_TREATED_TCELL_17H_DN                                    | 184 | 0.3355729  | 15.482.072 | 0.004       | 0.004889189  | 0.999 |
| GSE43955_THO_VS_TGFB_IL6_IL23_TH17_ACT_CD4_TCELL_60H_UP                           | 199 | 0.33528394 | 15.477.303 | 0.002652519 | 0.004914969  | 0.999 |
| GSE2585_THYMIC_MACROPHAGE_VS_MTEC_UP                                              | 188 | 0.33590364 | 15.477.479 | 0.002600780 | 0.004918534  | 0.999 |
| GSE11057_NAIVE_VS_CENT_MEMORY_CD4_TCELL_UP                                        | 168 | 0.34259868 | 15.475.891 | 0.002732240 | 0.004918537  | 0.999 |
| GSE360_L_MAJOR_VS_M_TUBERCULOSIS_DC_DN                                            | 193 | 0.33521202 | 15.476.264 | 0.003942181 | 0.004919236  | 0.999 |
| GSE7831_UNSTIM_VS_INFLUENZA_STIM_PDC_1H_UP                                        | 189 | 0.33387116 | 15.464.274 | 0.0         | 0.005017637  | 1.0   |
| GSE16385_IFNG_TNF_VS_IL4_STIM_MACROPHAGE_ROSIGLITAZONE_TREATED_UP                 | 169 | 0.34078264 | 154.618    | 0.004048583 | 0.005032535  | 1.0   |
| GSE37301_COMMON_LYMPHOID_PROGENITOR_VS_RAG2_KO_NK_CELL_UP                         | 190 | 0.33365145 | 15.458.487 | 0.001331557 | 0.00505024   | 1.0   |
| GSE9988_ANTI_TREM1_VS_LOW_LPS_MONOCYTE_UP                                         | 186 | 0.3344644  | 15.456.505 | 0.001324503 | 0.005065138  | 1.0   |
| GSE24574_BCL6_HIGH_TFH_VS_TFH_CD4_TCELL_UP                                        | 188 | 0.34063554 | 15.454.212 | 0.002688172 | 0.005080014  | 1.0   |
| GSE26030_UNSTIM_VS_RESTIM_TH17_DAY5_POST_POLARIZATION_UP                          | 173 | 0.33919656 | 15.449.128 | 0.004092769 | 0.005114673  | 1.0   |
| GSE9988_LOW_LPS_VS_CTRL_TREATED_MONOCYTE_DN                                       | 191 | 0.3314942  | 1.543.967  | 0.0         | 0.005188192  | 1.0   |
| GSE26030_TH1_VS_TH17_RESTIMULATED_DAY15_POST_POLARIZATION_UP                      | 195 | 0.3329678  | 15.440.077 | 0.0         | 0.005188342  | 1.0   |
| GSE23502_WT_VS_HDC_KO_MYELOID_DERIVED_SUPPRESSOR_CELL_BM_DN                       | 192 | 0.33260673 | 15.429.358 | 0.001335113 | 0.005259577  | 1.0   |
| GSE11961_MARGINAL_ZONE_BCELL_VS_MEMORY_BCELL_DAY40_UP                             | 193 | 0.3293065  | 15.425.723 | 0.0         | 0.005281480  | 1.0   |
| GSE2706_2H_VS_8H_R848_AND_LPS_STIM_DC_DN                                          | 187 | 0.33355403 | 15.426.052 | 0.001288659 | 0.005281753  | 1.0   |
| GSE29164_DAY3_VS_DAY7_CD8_TCELL_TREATED_MELANOMA_UP                               | 194 | 0.33132514 | 1.542.663  | 0.001340482 | 0.005282012  | 1.0   |
| GSE8515_IL1_VS_IL6_4H_STIM_MAC_UP                                                 | 196 | 0.3321444  | 15.421.966 | 0.001351351 | 0.005305984  | 1.0   |
| GSE9960_GRAM_NEG_VS_GRAM_NEG_AND_POS_SEPSIS_PBMUC_UP                              | 166 | 0.3399509  | 15.420.256 | 0.002635046 | 0.005311105  | 1.0   |
| GSE25088_ROSIGLITAZONE_VS_IL4_AND_ROSIGLITAZONE_STIM_STAT6_KO_MACROPHAGE_DAY10_UP | 187 | 0.33376288 | 15.420.388 | 0.002699055 | 0.005313497  | 1.0   |
| GSE6269_E_COLI_VS_STREP_PNEUMO_INF_PBMUC_DN                                       | 160 | 0.34094056 | 15.414.656 | 0.0         | 0.005346783  | 1.0   |
| GSE26343_WT_VS_NFAT5_KO_MACROPHAGE_LPS_STIM_UP                                    | 196 | 0.3306805  | 15.402.694 | 0.001272264 | 0.005431690  | 1.0   |
| GSE40274_FOXP3_VS_FOXP3_AND_GATA1_TRANSDUCED_ACTIVATED_CD4_TCELL_DN               | 192 | 0.3352203  | 1.540.007  | 0.002594033 | 0.005448956  | 1.0   |
| GSE24142_DN2_VS_DN3_THYMOCYTE_FETAL_UP                                            | 198 | 0.33371806 | 15.396.926 | 0.002666666 | 0.005482373  | 1.0   |
| GSE37301_PRO_BCELL_VS_RAG2_KO_NK_CELL_DN                                          | 176 | 0.33953547 | 15.393.994 | 0.006622516 | 0.005505872  | 1.0   |
| GSE4984_GALECTIN1_VS_VEHICLE_CTRL_TREATED_DC_UP                                   | 176 | 0.336706   | 15.393.682 | 0.0         | 0.005506157  | 1.0   |
| GSE22886_IGA_VS_IGM_MEMORY_BCELL_UP                                               | 192 | 0.33446413 | 15.393.077 | 0.001319261 | 0.005507839  | 1.0   |
| GSE3982_BASOPHIL_VS_NKCELL_UP                                                     | 187 | 0.33174473 | 15.382.366 | 0.001326259 | 0.005601464  | 1.0   |
| GSE11961_MEMORY_BCELL_DAY7_VS_GERMINAL_CENTER_BCELL_DAY7_UP                       | 192 | 0.3325967  | 15.379.881 | 0.0         | 0.005616351  | 1.0   |
| GSE43955_10H_VS_30H_ACT_CD4_TCELL_WITH_TGFB_IL6_DN                                | 194 | 0.33308733 | 15.376.883 | 0.001287001 | 0.005646669  | 1.0   |
| GSE26156_DOUBLE_POSITIVE_VS_CD4_SINGLE_POSITIVE_THYMOCYTE_UP                      | 192 | 0.33534172 | 1.536.805  | 0.001308900 | 0.005730920  | 1.0   |
| GSE20366_EX_VIVO_VS_DEC205_CONVERSION_NAIVE_CD4_TCELL_DN                          | 185 | 0.33723602 | 1.536.761  | 0.002624672 | 0.005731045  | 1.0   |
| GSE28408_LY6G_POS_VS_NEG_DC_UP                                                    | 190 | 0.3345433  | 15.365.211 | 0.001307189 | 0.005751449  | 1.0   |
| GSE26030_UNSTIM_VS_RESTIM_TH1_DAY15_POST_POLARIZATION_UP                          | 197 | 0.33538538 | 15.362.422 | 0.002652519 | 0.005770463  | 1.0   |
| GSE360_DC_VS_MAC_L_DONOVANI_DN                                                    | 196 | 0.3305278  | 15.360.442 | 0.003901170 | 0.005776213  | 1.0   |
| GSE17721_POLYIC_VS_GARDIQUIMOD_16H_BMDM_UP                                        | 193 | 0.3342007  | 15.360.938 | 0.002635046 | 0.005778193  | 1.0   |
| GOLDRATH_NAIVE_VS_EFF_CD8_TCELL_DN                                                | 197 | 0.33273026 | 1.535.959  | 0.001321004 | 0.005779782  | 1.0   |
| GSE29164_UNTREATED_VS_CD8_TCELL_AND_IL12_TREATED_MELANOMA_DAY7_DN                 | 189 | 0.33350924 | 153.557    | 0.002621232 | 0.005813324  | 1.0   |
| GSE9650_GP33_VS_GP276_LCMV_SPECIFIC_EXHAUSTED_CD8_TCELL_UP                        | 198 | 0.33187518 | 15.354.196 | 0.0         | 0.005818985  | 1.0   |
| GSE40274_FOXP3_VS_FOXP3_AND_XBP1_TRANSDUCED_ACTIVATED_CD4_TCELL_DN                | 150 | 0.34138522 | 15.345.036 | 0.004037685 | 0.005905888  | 1.0   |
| GSE16385_UNTREATED_VS_12H_ROSIGLITAZONE_TREATED_MACROPHAGE_UP                     | 158 | 0.34064463 | 15.339.702 | 0.001349527 | 0.005952455  | 1.0   |
| GSE25088_IL4_VS_IL4_AND_ROSIGLITAZONE_STIM_MACROPHAGE_DAY10_UP                    | 195 | 0.3315435  | 15.338.277 | 0.0         | 0.005959379  | 1.0   |
| GSE46606_DAY1_VS_DAY3_CD40L_IL2_IL5_STIMULATED_IRF4MID_BCELL_UP                   | 191 | 0.33574754 | 15.333.064 | 0.001290322 | 0.006002326  | 1.0   |
| GSE21063_3H_VS_16H_ANTI_IGM_STIM_NFATC1_KOBCELL_UP                                | 194 | 0.3320593  | 1.533.245  | 0.001328021 | 0.006004369  | 1.0   |
| GSE360_HIGH_VS_LOW_DOSE_B_MALAYI_MAC_DN                                           | 197 | 0.3320058  | 15.329.262 | 0.002580645 | 0.0062025847 | 1.0   |
| GSE2128_C57BL6_VS_NOD_THYMOCYTE_MIMETOPE_NEGATIVE_SELECTION_DN                    | 190 | 0.32948816 | 1.532.833  | 0.003968254 | 0.006202929  | 1.0   |

|                                                                             |     |            |            |             |             |     |
|-----------------------------------------------------------------------------|-----|------------|------------|-------------|-------------|-----|
| GSE5503_MLN_DC_VS_PLN_DC_ACTIVATED_ALLOGENIC_TCELL_DN                       | 191 | 0.33113843 | 15.327.015 | 0.0         | 0.006035383 | 1.0 |
| GSE4590_SMALL_VS_VPREB_POS_LARGE_PRE_BCELL_DN                               | 151 | 0.3454603  | 15.323.462 | 0.002781641 | 0.006064394 | 1.0 |
| GSE43955_1H_VS_42H_ACT_CD4_TCELL_UP                                         | 196 | 0.33153713 | 15.319.806 | 0.005167959 | 0.006087072 | 1.0 |
| GSE3720_VD1_VS_VD2_GAMMADELTA_TCELL_WITH_LPS_STIM_DN                        | 192 | 0.33350873 | 15.30.683  | 0.005464480 | 0.006196819 | 1.0 |
| GSE18281_SUBCAPSULAR_CORTICAL_REGION_VS_WHOLE_MEDULLA_THYMUS_DN             | 186 | 0.33250502 | 15.298.755 | 0.003984064 | 0.006277991 | 1.0 |
| GSE36078_UNTREATED_VS_AD5_T425A_HEXON_INF_MOUSE_LUNG_DC_DN                  | 195 | 0.32949615 | 15.295.873 | 0.001280409 | 0.006301202 | 1.0 |
| GSE3982_NEUTROPHIL_VS_NKCELL_UP                                             | 198 | 0.3299077  | 15.292.007 | 0.001322751 | 0.006336095 | 1.0 |
| GSE7852_TREG_VS_TCONV_FAT_UP                                                | 195 | 0.32986426 | 15.287.898 | 0.0         | 0.006372346 | 1.0 |
| GSE6566_STRONG_VS_WEAK_DC_STIMULATED_CD4_TCELL_DN                           | 174 | 0.33646983 | 15.287.315 | 0.002680965 | 0.006374096 | 1.0 |
| GSE2585_CTEC_VS_MTEC_THYMUS_UP                                              | 187 | 0.33522758 | 15.285.364 | 0.0         | 0.006393712 | 1.0 |
| GSE32986_GMCSF_AND_CURDLAN_LOWDOSE_VS_GMCSF_AND_CURDLAN_HIGHDOSE_STIM_DC_DN | 177 | 0.33403277 | 15.284.827 | 0.001336898 | 0.006394756 | 1.0 |
| GSE2770_UNTREATED_VS_ACT_CD4_TCELL_2H_UP                                    | 191 | 0.3303455  | 15.28.275  | 0.003865979 | 0.006408177 | 1.0 |
| GSE26030_UNSTIM_VS_RESTIM_TH1_DAY5_POST_POLARIZATION_UP                     | 191 | 0.3363581  | 15.281.864 | 0.001282051 | 0.006417411 | 1.0 |
| GSE32034_LY6C_HIGH_VS_LOW_ROSIGLITAZONE_TREATED_MONOCYTE_DN                 | 197 | 0.33095017 | 15.274.333 | 0.001300390 | 0.006489776 | 1.0 |
| GSE3982_NKCELL_VS_TH1_UP                                                    | 183 | 0.33251163 | 15.273.271 | 0.002663115 | 0.006500305 | 1.0 |
| GSE27859_CD11C_INT_F480_HI_MACROPHAGE_VS_CD11C_ING_F480_INT_DC_UP           | 172 | 0.33199883 | 15.27.269  | 0.002557544 | 0.006503327 | 1.0 |
| GSE16385_ROSIGLITAZONE_IL4_VS_IL4_ALONE_STIM_MACROPHAGE_12H_UP              | 191 | 0.33276108 | 15.268.255 | 0.001273885 | 0.006541225 | 1.0 |
| GSE8921_UNSTIM_OH_VS_TLR1_2_STIM_MONOCYTE_12H_DN                            | 193 | 0.32880664 | 15.260.676 | 0.0         | 0.006605814 | 1.0 |
| GSE43955_1H_VS_60H_ACT_CD4_TCELL_WITH_TGFB_IL6_UP                           | 196 | 0.3290135  | 15.259.705 | 0.002534854 | 0.006612165 | 1.0 |
| GSE28726_NAIVE_VS_ACTIVATED_VA24NEG_NKCELL_DN                               | 191 | 0.32738006 | 15.244.293 | 0.004137931 | 0.006763302 | 1.0 |
| GSE8621_UNSTIM_VS_LPS_STIM_MACROPHAGE_DN                                    | 191 | 0.33095014 | 15.23.323  | 0.001288659 | 0.006861063 | 1.0 |
| GSE37416_OH_VS_6H_F_TULARENSIS_LVS_NEUTROPHIL_UP                            | 192 | 0.32707727 | 15.230.719 | 0.002628120 | 0.00689041  | 1.0 |
| GSE21927_SPLEEN_VS_C26GM_TUMOR_MONOCYTE_BALBC_UP                            | 157 | 0.33638126 | 15.226.166 | 0.003963012 | 0.006946942 | 1.0 |
| GSE7831_UNSTIM_VS_CPG_STIM_PDC_4H_DN                                        | 195 | 0.33187833 | 15.224.795 | 0.001340482 | 0.006952352 | 1.0 |
| GSE21927_SPLENIC_VS_TUMOR_MONOCYTES_FROM_C26GM_TUMOROUS_MICE_BALBC_UP       | 171 | 0.33033404 | 15.218.428 | 0.001369863 | 0.007020307 | 1.0 |
| GSE24814_STATS_KO_VS_WT_PRE_BCELL_UP                                        | 190 | 0.32990807 | 15.216.633 | 0.0         | 0.007034478 | 1.0 |
| GSE1112_OT1_VS_HY_CD8AB_THYMOCYTE_RTOC_CULTURE_UP                           | 191 | 0.3309805  | 15.215.281 | 0.0         | 0.007036892 | 1.0 |
| GSE22432_UNTREATED_VS_TGFB1_TREATED_COMMON_DC_PROGENITOR_UP                 | 190 | 0.3319356  | 15.215.306 | 0.002594033 | 0.007041742 | 1.0 |
| GSE13173_UNTREATED_VS_IL12_TREATED_ACT_CD8_TCELL_UP                         | 119 | 0.3540054  | 15.215.354 | 0.007112375 | 0.007045222 | 1.0 |
| GSE22601_DOUBLE_NEGATIVE_VS_IMMATURE_CD4_SP_THYMOCYTE_DN                    | 175 | 0.3334017  | 15.209.498 | 0.002677376 | 0.007102675 | 1.0 |
| GSE7852_TREG_VS_TCONV_UP                                                    | 193 | 0.33098507 | 15.208.429 | 0.001319261 | 0.007106588 | 1.0 |
| GSE31082_DN_VS_CD4_SP_THYMOCYTE_DN                                          | 193 | 0.33065864 | 15.204.794 | 0.003870967 | 0.007148415 | 1.0 |
| GSE40274_FOXP3_VS_FOXP3_AND_SATB1_TRANSDUCE_ACTIVATED_CD4_TCELL_DN          | 168 | 0.3369773  | 15.202.596 | 0.006963788 | 0.007163661 | 1.0 |
| GSE5589_LPS_AND_IL10_VS_LPS_AND_IL6_STIM_IL10_KO_MACROPHAGE_45MIN_UP        | 194 | 0.33027083 | 15.202.628 | 0.003821656 | 0.007167235 | 1.0 |
| GSE3982_BASOPHIL_VS_EFF_MEMORY_CD4_TCELL_UP                                 | 194 | 0.33165675 | 15.200.127 | 0.0         | 0.007189188 | 1.0 |
| GSE21927_SPLEEN_VS_TUMOR_MONOCYTE_C57BL6_UP                                 | 165 | 0.33317092 | 15.191.917 | 0.001328021 | 0.007191690 | 1.0 |
| GSE27786_CD4_VS_CD8_TCELL_UP                                                | 194 | 0.32530522 | 15.195.014 | 0.003886010 | 0.007238474 | 1.0 |
| GSE32901_TH1_VS_TH17_ENRICHED_CD4_TCELL_UP                                  | 171 | 0.3337987  | 15.195.081 | 0.006858710 | 0.007242763 | 1.0 |
| GSE40274_CTRL_VS_FOXP3_AND_SATB1_TRANSDUCE_ACTIVATED_CD4_TCELL_DN           | 144 | 0.34269956 | 15.191.059 | 0.004322767 | 0.007278068 | 1.0 |
| GSE39820_CTRL_VS_IL1B_IL6_IL23A_CD4_TCELL_UP                                | 198 | 0.32801804 | 15.18.715  | 0.001356852 | 0.007305462 | 1.0 |
| GSE17974_OH_VS_0.5H_IN_VITRO_ACT_CD4_TCELL_UP                               | 174 | 0.3302581  | 15.186.324 | 0.0         | 0.007308532 | 1.0 |
| GSE19941_IL10_KO_VS_IL10_KO_AND_NFKBP50_KO_UNSTIM_MACROPHAGE_DN             | 196 | 0.32925013 | 15.185.442 | 0.002642008 | 0.007316984 | 1.0 |
| GSE22886_NAIVE_TCELL_VS_NKCELL_UP                                           | 190 | 0.3316195  | 15.185.055 | 0.003921569 | 0.007317367 | 1.0 |
| GSE15767_MED_VS_SCS_MAC_LN_DN                                               | 191 | 0.3277508  | 15.183.307 | 0.001298701 | 0.007329195 | 1.0 |
| GSE37301_HEMATOPOIETIC_STEM_CELL_VS_PRO_BCELL_UP                            | 189 | 0.32679486 | 15.181.739 | 0.0         | 0.007344352 | 1.0 |
| GSE24671_CTRL_VS_BAKIMULC_INFECTED_MOUSE_SPLENOCYTES_UP                     | 194 | 0.32932648 | 15.170.068 | 0.001360544 | 0.007473467 | 1.0 |
| GSE25088_WT_VS_STAT6_KO_MACROPHAGE_ROSIGLITAZONE_STIM_DN                    | 188 | 0.32749373 | 15.166.963 | 0.002567394 | 0.007502554 | 1.0 |
| GSE36826_WT_VS_IL1R_KO_SKIN_DN                                              | 194 | 0.3285826  | 15.165.609 | 0.002645502 | 0.007513521 | 1.0 |
| GSE13411_IGM_MEMORY_BCELL_VS_PLASMA_CELL_UP                                 | 187 | 0.32838023 | 15.164.515 | 0.005228758 | 0.007519839 | 1.0 |
| GSE17721_POLYIC_VS_GARDIQUIMOD_8H_BMDM_UP                                   | 195 | 0.3289361  | 15.162.647 | 0.005115089 | 0.007528302 | 1.0 |
| GSE2585_THYMIC_DC_VS_MTEC_DN                                                | 196 | 0.32548097 | 15.163.116 | 0.005340454 | 0.007529406 | 1.0 |
| GSE11864_CSF1_VS_CSF1_PAM3CYS_IN_MAC_UP                                     | 184 | 0.32884187 | 15.151.182 | 0.001315789 | 0.007653446 | 1.0 |
| GSE3982_EOSINOPHIL_VS_BCELL_UP                                              | 197 | 0.32480913 | 15.146.117 | 0.0         | 0.007706316 | 1.0 |
| GSE2770_IL12_AND_TGFB_ACT_VS_ACT_CD4_TCELL_48H_UP                           | 184 | 0.3337853  | 15.121.742 | 0.001338688 | 0.00795489  | 1.0 |
| GSE25088_WT_VS_STAT6_KO_MACROPHAGE_IL4_STIM_UP                              | 190 | 0.32783458 | 15.123.544 | 0.001319261 | 0.00795509  | 1.0 |
| GSE12845_IGD_POS_BLOOD_VS_DARKZONE_GC_TONSIL_BCELL_UP                       | 190 | 0.3270234  | 15.122.226 | 0.005277045 | 0.007955603 | 1.0 |
| GSE37336_LY6C_POS_VS_NEG_NAIVE_CD4_TCELL_DN                                 | 152 | 0.33822948 | 15.123.084 | 0.002785515 | 0.007956385 | 1.0 |
| GSE13306_TREG_VS_TCONV_LAMINA_PROPRIA_DN                                    | 186 | 0.33073264 | 15.122.241 | 0.002631579 | 0.007960983 | 1.0 |
| GSE11961_MARGINAL_ZONE_BCELL_VS_GERMINAL_CENTER_BCELL_DAY7_DN               | 190 | 0.32822162 | 15.120.437 | 0.001326259 | 0.007964131 | 1.0 |
| GSE25123_CTRL_VS_ROSIGLITAZONE_STIM_PPARG_KO_MACROPHAGE_DN                  | 192 | 0.32533145 | 15.119.406 | 0.0         | 0.007975392 | 1.0 |
| GSE19512_NAURAL_VS_INDUCED_TREG_UP                                          | 191 | 0.32934693 | 15.115.414 | 0.002659574 | 0.008017186 | 1.0 |
| GSE19825_NAIVE_VS_IL2RALOW_DAY3_EFF_CD8_TCELL_UP                            | 195 | 0.32706234 | 15.107.317 | 0.002673796 | 0.008119336 | 1.0 |
| GSE14350_IL2RB_KO_VS_WT_TEFF_UP                                             | 192 | 0.32523462 | 15.105.108 | 0.002628120 | 0.008129621 | 1.0 |
| GSE21546_WT_VS_SAP1A_KO_AND_ELK1_KO_ANTI_CD3_STIM_DP_THYMOCYTES_DN          | 190 | 0.3298339  | 15.105.559 | 0.002580645 | 0.008131784 | 1.0 |
| GSE23502_WT_VS_HDC_KO_MYELOID_DERIVED_SUPPRESSOR_CELL_COLON_TUMOR_DN        | 189 | 0.32719794 | 15.102.885 | 0.002594033 | 0.008145885 | 1.0 |
| GSE3982_BCELL_VS_BASOPHIL_DN                                                | 194 | 0.324594   | 15.102.236 | 0.005181347 | 0.008149648 | 1.0 |
| GSE12484_HEALTHY_VS_PERIDONTITIS_NEUTROPHILS_UP                             | 130 | 0.3429854  | 15.103.035 | 0.006887052 | 0.008150694 | 1.0 |
| GSE17974_OH_VS_0.5H_IN_VITRO_ACT_CD4_TCELL_DN                               | 166 | 0.33395988 | 15.100.186 | 0.004081632 | 0.008169332 | 1.0 |
| GSE6269_E_COLI_VS_STAPH_AUREUS_INF_PBMCD_DN                                 | 180 | 0.33033714 | 15.099.958 | 0.002677376 | 0.008171101 | 1.0 |
| GSE1460_DP_THYMOCYTE_VS_NAIVE_CD4_TCELL_ADULT_BLOOD_DN                      | 191 | 0.3266917  | 15.094.583 | 0.002638522 | 0.008221066 | 1.0 |
| GSE3994_WT_VS_PAC1_KO_ACTIVATED_MAST_CELL_DN                                | 196 | 0.32986227 | 15.092.952 | 0.001295336 | 0.008230725 | 1.0 |
| GSE17721_CPG_VS_GARDIQUIMOD_16H_BMDM_UP                                     | 194 | 0.32730275 | 15.091.457 | 0.001338688 | 0.008239702 | 1.0 |
| GSE32986_GMCSF_VS_GMCSF_AND_CURDLAN_HIGHDOSE_STIM_DC_DN                     | 179 | 0.32892174 | 15.090.119 | 0.001336898 | 0.008249302 | 1.0 |
| GSE21033_1H_VS_12H_POLYIC_STIM_DC_UP                                        | 170 | 0.3333673  | 15.086.823 | 0.009186352 | 0.008291845 | 1.0 |
| GSE20366_TREG_VS_NAIVE_CD4_TCELL_DEC205_CONVERSION_DN                       | 192 | 0.32328612 | 15.086.241 | 0.003921569 | 0.008293509 | 1.0 |
| GSE27786_LSK_VS_CD4_TCELL_DN                                                | 190 | 0.3284649  | 15.082.158 | 0.002666666 | 0.008339274 | 1.0 |
| GSE17721_PAM3CSK4_VS_GARDIQUIMOD_2H_BMDM_UP                                 | 197 | 0.32497373 | 15.073.287 | 0.001288659 | 0.008442041 | 1.0 |
| GSE36888_STATS_AB_KNOCKIN_VS_WT_TCELL_IL2_TREATED_6H_UP                     | 187 | 0.3243831  | 15.07.112  | 0.001412429 | 0.00846066  | 1.0 |
| GSE21360_PRIMARY_VS_QUATERNARY_MEMORY_CD8_TCELL_DN                          | 194 | 0.32682863 | 15.070.153 | 0.004070556 | 0.008468806 | 1.0 |
| GSE37533_PPARG1_FOXP3_VS_PPARG2_FOXP3_TRANSDUCE_CD4_TCELL_DN                | 180 | 0.32702094 | 15.058.539 | 0.004081632 | 0.008612639 | 1.0 |
| GSE46606_UNSTIM_VS_CD40L_IL2_IL5_3DAY_STIMULATED_IRF4MID_SORTED_BCELL_DN    | 191 | 0.32431734 | 15.052.742 | 0.003994674 | 0.008687410 | 1.0 |
| GSE15324_NAIVE_VS_ACTIVATED_CD8_TCELL_UP                                    | 190 | 0.33129388 | 15.051.662 | 0.001319261 | 0.008699342 | 1.0 |
| GSE40666_NAIVE_VS_EFFECTOR_CD8_TCELL_UP                                     | 194 | 0.32509965 | 15.033.286 | 0.007712082 | 0.008906282 | 1.0 |
| GSE12366_PLASMA_CELL_VS_MEMORY_BCELL_DN                                     | 190 | 0.32518423 | 15.02.364  | 0.003870967 | 0.009040334 | 1.0 |
| GSE26559_TCF1_KO_VS_WT_LIN_NEG_CELL_DN                                      | 185 | 0.3271581  | 15.016.934 | 0.002652519 | 0.009123757 | 1.0 |
| GSE31082_CD4_VS_CD8_SP_THYMOCYTE_UP                                         | 191 | 0.32285917 | 15.015.975 | 0.00660502  | 0.009128189 | 1.0 |
| GSE24210_TCONV_VS_TREG_UP                                                   | 190 | 0.32324567 | 15.014.024 | 0.003968254 | 0.009142358 | 1.0 |
| GSE20366_TREG_VS_TCONV_UP                                                   | 195 | 0.32545125 | 15.008.674 | 0.001322751 | 0.009203507 | 1.0 |
| GSE21546_UNSTIM_VS_ANTI_CD3_STIM_SAP1A_KO_AND_ELK1_KO_DP_THYMOCYTES_DN      | 154 | 0.33536533 | 14.999.701 | 0.008241759 | 0.009322562 | 1.0 |

|          |                                                                           |     |            |            |              |             |     |
|----------|---------------------------------------------------------------------------|-----|------------|------------|--------------|-------------|-----|
| GSE13229 | MATURE_VS_INTMATURE_NKCELL_UP                                             | 187 | 0.32815784 | 14.997.151 | 0.0013333333 | 0.009348276 | 1.0 |
| GSE11961 | GERMINAL_CENTER_BCELL_DAY7_VS_PLASMA_CELL_DAY7_UP                         | 196 | 0.3228162  | 14.990.437 | 0.003952569  | 0.00943522  | 1.0 |
| GSE21379 | WT_VS_SAP_KO_CD4_TCELL_DN                                                 | 192 | 0.32839438 | 14.987.606 | 0.006640106  | 0.009470576 | 1.0 |
| GSE2405  | OH_VS_24H_A_PHAGOCYTOPHILUM_STIM_NEUTROPHIL_DN                            | 192 | 0.32754177 | 14.983.649 | 0.002673796  | 0.009531284 | 1.0 |
| GSE15750 | DAY6_VS_DAY10_TRAF6KO_EFF_CD8_TCELL_DN                                    | 186 | 0.3273603  | 14.982.451 | 0.004065040  | 0.009541222 | 1.0 |
| GSE21670 | IL6_VS_TGFB_AND_IL6_TREATED_STAT3_KO_CD4_TCELL_DN                         | 191 | 0.32447776 | 14.980.295 | 0.002673796  | 0.009561548 | 1.0 |
| GSE12845 | IGD_POS_BLOOD_VS_NAIVE_TONSIL_BCELL_UP                                    | 186 | 0.32412407 | 14.974.233 | 0.002587322  | 0.009628084 | 1.0 |
| GSE43863 | TH1_VS_LY6C_INT_CXCR5POS_MEMORY_CD4_TCELL_DN                              | 193 | 0.32465342 | 14.974.499 | 0.002677376  | 0.009631822 | 1.0 |
| GSE27859 | MACROPHAGE_VS_DC_UP                                                       | 162 | 0.33082452 | 14.970.815 | 0.006811989  | 0.009675555 | 1.0 |
| GSE37533 | UNTREATED_VS_PIOGLIZATONE_TREATED_CD4_TCELL_PPARG1_AND_FOXP3_TRASDUCED_UP | 196 | 0.32106107 | 14.970.176 | 0.003886010  | 0.009680195 | 1.0 |
| GSE36888 | STATS_AB_KNOCKIN_VS_WT_TCELL_IL2_TREATED_17H_UP                           | 196 | 0.32283816 | 14.964.696 | 0.002554278  | 0.009756672 | 1.0 |
| GSE18281 | MEDULLARY_THYMOCYTE_VS_WHOLE_MEDULLA_THYMUS_UP                            | 181 | 0.32776716 | 14.963.561 | 0.002554278  | 0.009758117 | 1.0 |
| GSE22601 | IMMATURE_CD4_SINGLE_POSITIVE_VS_CD4_SINGLE_POSITIVE_THYMOCYTE_UP          | 195 | 0.32331166 | 14.964.051 | 0.003886010  | 0.009758705 | 1.0 |
| GSE13522 | WT_VS_IFNG_KO_SKIN_DN                                                     | 120 | 0.349563   | 1.496.254  | 0.008571428  | 0.009764623 | 1.0 |
| GSE9601  | UNTREATED_VS_NFKB_INHIBITOR_TREATED_HCMV_INF_MONOCYTE_UP                  | 157 | 0.33457536 | 14.961.715 | 0.004037685  | 0.009768586 | 1.0 |
| GSE22025 | UNTREATED_VS_TGFB1_TREATED_CD4_TCELL_DN                                   | 192 | 0.32201335 | 14.960.495 | 0.007822686  | 0.009786719 | 1.0 |
| GSE7348  | UNSTIM_VS_TOLERIZED_AND_LPS_STIM_MACROPHAGE_DN                            | 156 | 0.3317648  | 14.953.946 | 0.006896551  | 0.009870587 | 1.0 |
| GSE15659 | TREG_VS_TCONV_DN                                                          | 161 | 0.33168247 | 14.953.197 | 0.002624672  | 0.009876368 | 1.0 |
| GSE13484 | 12H_VS_3H_YF17D_VACCINE_STIM_PBMC_DN                                      | 194 | 0.32308963 | 14.950.715 | 0.001329787  | 0.009901439 | 1.0 |
| GSE44649 | WT_VS_MIR155_KO_NAIVE_CD8_TCELL_UP                                        | 193 | 0.32532176 | 14.950.901 | 0.001364256  | 0.009904053 | 1.0 |
| GSE25087 | TREG_VS_TCONV_FETUS_UP                                                    | 187 | 0.32542092 | 14.949.613 | 0.00405954   | 0.009909724 | 1.0 |
| GSE17322 | CD103_POS_VS_CD11B_HIGH_LUNG_DC_UP                                        | 188 | 0.32584843 | 14.936.364 | 0.006693440  | 0.010093325 | 1.0 |
| GSE7768  | OVA_ALONE_VS_OVA_WITH_MPL_IMMUNIZED_MOUSE_WHOLE_SPLEEN_6H_DN              | 160 | 0.33209756 | 14.935.194 | 0.004092769  | 0.010102189 | 1.0 |
| GSE11864 | UNTREATED_VS_CSF1_IN_MAC_UP                                               | 187 | 0.324375   | 14.933.677 | 0.006693440  | 0.010125105 | 1.0 |
| GSE2826  | WT_VS_BTK_KO_BCELL_DN                                                     | 190 | 0.32371283 | 14.928.899 | 0.001321004  | 0.010186451 | 1.0 |
| GSE6259  | 33D1_POS_VS_DEC205_POS_SPLENIC_DC_UP                                      | 174 | 0.33115932 | 14.919.347 | 0.003911347  | 0.010325922 | 1.0 |
| GSE34205 | HEALTHY_VS_FLU_INF_INFANT_PBMC_DN                                         | 190 | 0.32362488 | 14.917.339 | 0.005235602  | 0.010350561 | 1.0 |
| GSE6259  | DEC205_POS_DC_VS_BCELL_DN                                                 | 164 | 0.33199468 | 14.915.239 | 0.005457026  | 0.010376478 | 1.0 |
| GSE3982  | MEMORY_CD4_TCELL_VS_TH1_UP                                                | 189 | 0.32373866 | 14.906.405 | 0.007905139  | 0.010492146 | 1.0 |
| GSE1566  | WT_VS_EZH2_KO_LN_TCELL_UP                                                 | 171 | 0.32900763 | 14.906.607 | 0.005361930  | 0.010495757 | 1.0 |
| GSE4748  | CTRL_VS_LPS_AND_CYANOBACTERIUM_LPSLIKE_STIM_DC_3H_UP                      | 191 | 0.32525453 | 1.490.432  | 0.001322751  | 0.010516020 | 1.0 |
| GSE17721 | CTRL_VS_GARDIQUIMOD_8H_BMDM_DN                                            | 193 | 0.32509306 | 14.902.346 | 0.003811944  | 0.010534076 | 1.0 |
| GSE9650  | EFFECTOR_VS_EXHAUSTED_CD8_TCELL_UP                                        | 194 | 0.32000208 | 14.896.404 | 0.00390625   | 0.010624883 | 1.0 |
| GSE33292 | DN3_THYMOCYTE_VS_TCF1_KO_TCELL_LYMPHOMA_DN                                | 140 | 0.33618286 | 14.890.372 | 0.007002801  | 0.010702101 | 1.0 |
| GSE360   | DC_VS_MAC_LAC_L_DONOVANI_UP                                               | 194 | 0.32263646 | 14.889.935 | 0.001317523  | 0.01070348  | 1.0 |
| GSE13547 | WT_VS_ZFX_KO_BCELL_DN                                                     | 171 | 0.32904118 | 14.885.553 | 0.002680965  | 0.010763443 | 1.0 |
| GSE17721 | 12H_VS_24H_PAM3CSK4_BMDM_DN                                               | 194 | 0.32092604 | 14.883.426 | 0.004048583  | 0.01078199  | 1.0 |
| GSE29949 | CD8_NEG_DC_SPLEEN_VS_CD8_POS_DC_SPLEEN_UP                                 | 195 | 0.32489935 | 14.882.059 | 0.002607561  | 0.01082719  | 1.0 |
| GSE40225 | WT_VS_RIP_B7X_DIABETIC_MOUSE_PANCREATIC_CD8_TCELL_UP                      | 183 | 0.326089   | 14.876.082 | 0.005361930  | 0.010901524 | 1.0 |
| GSE14769 | UNSTIM_VS_240MIN_LPS_BMDM_DN                                              | 197 | 0.32078668 | 14.872.421 | 0.001287001  | 0.010959357 | 1.0 |
| GSE37532 | WT_VS_PPARG_KO_LN_TCONV_DN                                                | 172 | 0.32670268 | 14.867.358 | 0.00947226   | 0.011037309 | 1.0 |
| GSE37301 | PRO_BCELL_VS_GRANULOCYTE_MONOCYTE_PROGENITOR_DN                           | 171 | 0.3306629  | 1.486.469  | 0.001349527  | 0.011074587 | 1.0 |
| GSE37416 | OH_VS_12H_F_TULARENSIS_LVS_NEUTROPHIL_UP                                  | 193 | 0.32321376 | 14.861.379 | 0.006648936  | 0.011127009 | 1.0 |
| GSE26030 | UNSTIM_VS_RESTIM_TH1_DAY15_POST_POLARIZATION_DN                           | 196 | 0.3234729  | 14.857.394 | 0.006426735  | 0.011174901 | 1.0 |
| GSE25677 | R848_VS_MPL_AND_R848_STIM_BCELL_UP                                        | 134 | 0.33685583 | 14.855.103 | 0.009735744  | 0.011211989 | 1.0 |
| GSE16385 | ROSIGLITAZONE_IL4_VS_IL4_ALONE_STIM_MACROPHAGE_12H_DN                     | 198 | 0.3199848  | 14.854.053 | 0.005221932  | 0.011219285 | 1.0 |
| GSE14386 | UNTREATED_VS_IFNA_TREATED_ACT_PBMC_MS_PATIENT_UP                          | 137 | 0.3384944  | 14.846.545 | 0.006906077  | 0.011337277 | 1.0 |
| GSE360   | L_DONOVANI_VS_T_GONDII_MAC_UP                                             | 190 | 0.32282522 | 14.838.611 | 0.011968086  | 0.011443654 | 1.0 |
| GSE25088 | IL4_VS_IL4_AND_ROSIGLITAZONE_STIM_STAT6_KO_MACROPHAGE_DAY10_UP            | 191 | 0.32384294 | 1.483.192  | 0.003875969  | 0.011531368 | 1.0 |
| GSE3982  | BCELL_VS_CENT_MEMORY_CD4_TCELL_DN                                         | 189 | 0.32003894 | 14.832.067 | 0.00390625   | 0.011538126 | 1.0 |
| GSE37605 | NOD_VS_C57BL6_IRES_GFP_TREG_UP                                            | 150 | 0.33094126 | 14.817.337 | 0.006747638  | 0.011760363 | 1.0 |
| GSE17721 | POLYIC_VS_PAM3CSK4_16H_BMDM_UP                                            | 194 | 0.31913367 | 14.809.024 | 0.006468305  | 0.011905286 | 1.0 |
| GSE19941 | LPS_VS_LPS_AND_IL10_STIM_IL10_KO_MACROPHAGE_DN                            | 151 | 0.32618898 | 14.807.844 | 0.012261581  | 0.011909565 | 1.0 |
| GSE18791 | CTRL_VS_NEWCASTLE_VIRUS_DC_1H_DN                                          | 164 | 0.32374662 | 14.808.475 | 0.004        | 0.011909636 | 1.0 |
| GSE5589  | LPS_VS_LPS_AND_IL10_STIM_MACROPHAGE_45MIN_UP                              | 194 | 0.3219652  | 14.804.517 | 0.002570694  | 0.011963593 | 1.0 |
| GSE13484 | UNSTIM_VS_3H_YF17D_VACCINE_STIM_PBMC_DN                                   | 191 | 0.3245027  | 14.803.342 | 0.007832898  | 0.011973562 | 1.0 |
| GSE38304 | MYC_NEG_VS_POS_GC_BCELL_UP                                                | 195 | 0.32021135 | 14.801.389 | 0.001307189  | 0.011999267 | 1.0 |
| GSE3691  | IFN_PRODUCING_KILLER_DC_VS_CONVENTIONAL_DC_SPLEEN_DN                      | 192 | 0.3202257  | 14.791.361 | 0.005277045  | 0.012172973 | 1.0 |
| GSE360   | L_MAJOR_VS_B_MALAYI_HIGH_DOSE_MAC_UP                                      | 191 | 0.3223415  | 14.787.731 | 0.00405340   | 0.01228537  | 1.0 |
| GSE22432 | CONVENTIONAL_CDC_VS_PLASMACYTOID_PDC_DN                                   | 190 | 0.32147703 | 14.785.665 | 0.001298701  | 0.012253768 | 1.0 |
| GSE22601 | DOUBLE_NEGATIVE_VS_CD8_SINGLE_POSITIVE_THYMOCYTE_UP                       | 174 | 0.32403257 | 14.785.888 | 0.006613756  | 0.012257168 | 1.0 |
| GSE35825 | UNTREATED_VS_IFNG_STIM_MACROPHAGE_DN                                      | 178 | 0.31775695 | 14.781.253 | 0.005326231  | 0.012319257 | 1.0 |
| GSE11057 | EFF_MEM_VS_CENT_MEM_CD4_TCELL_DN                                          | 165 | 0.3274616  | 14.778.862 | 0.005390835  | 0.012349627 | 1.0 |
| GSE22611 | NOD2_TRANSD_VS_CTRL_TRANSD_HEK293_MDP_STIM_2H_UP                          | 187 | 0.32125854 | 14.770.633 | 0.003896104  | 0.012493228 | 1.0 |
| GSE22611 | UNSTIM_VS_6H_MDP_STIM_NOD2_TRANSDUCED_HEK293T_CELL_DN                     | 192 | 0.31817824 | 14.767.863 | 0.005284016  | 0.012525893 | 1.0 |
| GSE43955 | 10H_VS_60H_ACT_CD4_TCELL_DN                                               | 195 | 0.31985795 | 14.765.078 | 0.0          | 0.012572302 | 1.0 |
| GSE11961 | FOLLICULAR_BCELL_VS_GERMINAL_CENTER_BCELL_DAY7_DN                         | 188 | 0.32240134 | 14.757.872 | 0.005312085  | 0.012697292 | 1.0 |
| GSE3920  | IFNA_VS_IFNG_TREATED_ENDOTHELIAL_CELL_DN                                  | 163 | 0.32725027 | 14.738.606 | 0.005449591  | 0.01305661  | 1.0 |
| GSE3039  | CD4_TCELL_VS_ALPHAALPHA_CD8_TCELL_UP                                      | 190 | 0.3175725  | 14.733.812 | 0.008985879  | 0.013119234 | 1.0 |
| GSE25087 | FETAL_VS_ADULT_TCONV_DN                                                   | 174 | 0.3246837  | 14.734.237 | 0.012362638  | 0.013120032 | 1.0 |
| GSE369   | PRE_VS_POST_IL6_INJECTION_IFNG_KO_LIVER_UP                                | 192 | 0.319572   | 14.724.083 | 0.001349527  | 0.013278458 | 1.0 |
| GSE3565  | DUSP1_VS_WT_SPLENOCYTES_DN                                                | 177 | 0.32265908 | 14.723.223 | 0.005398110  | 0.013289347 | 1.0 |
| GSE24142 | DN2_VS_DN3_THYMOCYTE_FETAL_DN                                             | 197 | 0.3214706  | 14.716.471 | 0.003989361  | 0.013422051 | 1.0 |
| GSE37534 | UNTREATED_VS_GW1929_TREATED_CD4_TCELL_PPARG1_AND_FOXP3_TRASDUCED_UP       | 199 | 0.3180618  | 14.713.649 | 0.004143646  | 0.013459571 | 1.0 |
| GSE11057 | NAIVE_VS_MEMORY_CD4_TCELL_UP                                              | 175 | 0.32286844 | 14.713.178 | 0.010738255  | 0.013460412 | 1.0 |
| GSE1432  | CTRL_VS_IFNG_2H_MICROGLIA_DN                                              | 187 | 0.32240927 | 14.700.954 | 0.006640106  | 0.01360798  | 1.0 |
| GSE21033 | 3H_VS_24H_POLYIC_STIM_DC_UP                                               | 156 | 0.32643262 | 14.695.408 | 0.011688312  | 0.013783853 | 1.0 |
| GSE46606 | IRF4_KO_VS_WT_CD40L_IL2_IL5_1DAY_STIMULATED_BCELL_UP                      | 184 | 0.31747085 | 14.689.068 | 0.00660502   | 0.013910879 | 1.0 |
| GSE3720  | LPS_VS_PMA_STIM_VD2_GAMMADELTA_TCELL_DN                                   | 149 | 0.33281124 | 14.687.651 | 0.012379643  | 0.01393065  | 1.0 |
| GSE22886 | NAIVE_TCELL_VS_NEUTROPHIL_DN                                              | 186 | 0.31762984 | 1.468.665  | 0.00397878   | 0.013938595 | 1.0 |
| GSE25088 | IL4_VS_IL4_AND_ROSIGLITAZONE_STIM_MACROPHAGE_DAY10_DN                     | 193 | 0.3169552  | 14.678.416 | 0.010471204  | 0.01409183  | 1.0 |
| GSE557   | WT_VS_CIITA_KO_DC_DN                                                      | 190 | 0.3201401  | 14.671.673 | 0.009222661  | 0.014230618 | 1.0 |
| GSE14308 | TH2_VS_TH17_DN                                                            | 189 | 0.31858715 | 14.669.342 | 0.005312085  | 0.014263621 | 1.0 |
| GSE32255 | WT_VS_JMJD2_KNOCKDOWN_4H_LPS_STIM_DC_UP                                   | 147 | 0.332602   | 1.466.792  | 0.013586956  | 0.014276911 | 1.0 |
| GSE17186 | NAIVE_VS_CD21LOW_TRANSITIONAL_BCELL_UP                                    | 194 | 0.3179711  | 14.664.757 | 0.009234829  | 0.01433585  | 1.0 |
| GSE14415 | ACT_TCONV_VS_ACT_NATURAL_TREG_UP                                          | 170 | 0.3226306  | 14.661.506 | 0.006729475  | 0.014376115 | 1.0 |
| GSE23114 | WT_VS_SLE2C1_MOUSE_SPLEEN_B1A_BCELL_DN                                    | 195 | 0.31771263 | 14.661.839 | 0.005154639  | 0.014380188 | 1.0 |
| GSE43863 | TFH_VS_LY6C_INT_CXCR5POS_MEMORY_CD4_TCELL_UP                              | 193 | 0.32152084 | 14.662.061 | 0.003931848  | 0.014381144 | 1.0 |
| GSE2770  | IL12_VS_TGFB_AND_IL12_TREATED_ACT_CD4_TCELL_2H_DN                         | 159 | 0.32363516 | 14.659.154 | 0.008230452  | 0.01441337  | 1.0 |



|          |                                                                                        |     |            |           |              |             |     |
|----------|----------------------------------------------------------------------------------------|-----|------------|-----------|--------------|-------------|-----|
| GSE22886 | NAIVE_VS_IGM_MEMORY_BCELL_UP                                                           | 189 | 0.31801566 | 14.656845 | 0.005174644  | 0.014443157 | 1.0 |
| GSE2770  | UNTREATED_VS_TGFB_AND_IL4_TREATED_ACT_CD4_TCELL_2H_DN                                  | 192 | 0.31438282 | 14.655693 | 0.007926024  | 0.014457458 | 1.0 |
| GSE13306 | TREG_VS_TCONV_LAMINA_PROPRIA_UP                                                        | 196 | 0.31893268 | 14.650015 | 0.0066596306 | 0.014576291 | 1.0 |
| GSE36826 | NORMAL_VS_STAPH_AUREUS_INF_IL1R_KO_SKIN_DN                                             | 189 | 0.31806237 | 14.642465 | 0.0066934401 | 0.01472624  | 1.0 |
| GSE41176 | UNSTIM_VS_ANTI_IGM_STIM_TAK1_KO_BCELL_3H_DN                                            | 187 | 0.31776106 | 14.634398 | 0.00405954   | 0.014891245 | 1.0 |
| GSE29949 | MICROGLIA_VS_DC_BRAIN_UP                                                               | 196 | 0.31742042 | 14.631674 | 0.013123359  | 0.014935952 | 1.0 |
| GSE4142  | GC_BCELL_VS_MEMORY_BCELL_UP                                                            | 192 | 0.313429   | 14.626043 | 0.003921569  | 0.01503889  | 1.0 |
| GSE25677 | MPL_VS_MPL_AND_R848_STIM_BCELL_UP                                                      | 157 | 0.32484064 | 14.624268 | 0.004178273  | 0.015068183 | 1.0 |
| GSE36888 | UNTREATED_VS_IL2_TREATED_STAT5_AB_KNOCKIN_TCELL_2H_UP                                  | 186 | 0.31790912 | 14.622914 | 0.003891050  | 0.015085153 | 1.0 |
| GSE19888 | CTRL_VS_A3R_ACTIVATION_MAST_CELL_DN                                                    | 188 | 0.31636292 | 1.460788  | 0.009198423  | 0.015398611 | 1.0 |
| GSE7568  | IL4_VS_IL4_AND_DEXAMETHASONE_TREATED_MACROPHAGE_DN                                     | 143 | 0.32605323 | 14.604679 | 0.016689846  | 0.015457496 | 1.0 |
| GSE30962 | PRIMARY_VS_SECONDARY_ACUTE_LCMV_INF_CD8_TCELL_DN                                       | 189 | 0.31799376 | 14.600196 | 0.006675567  | 0.015537224 | 1.0 |
| GSE43955 | TGFB_IL6_VS_TGFB_IL6_IL23_TH17_ACT_CD4_TCELL_52H_DN                                    | 195 | 0.31594932 | 14.600508 | 0.003952569  | 0.015542586 | 1.0 |
| GSE40443 | INDUCED_VS_TOTAL_TREG_UP                                                               | 197 | 0.31400782 | 14.598935 | 0.006561679  | 0.015553806 | 1.0 |
| GSE3920  | IFNA_VS_IFNG_TREATED_FIBROBLAST_DN                                                     | 181 | 0.31719124 | 14.594289 | 0.007782101  | 0.015647212 | 1.0 |
| GSE9006  | HEALTHY_VS_TYPE_1_DIABETES_PBMC_AT_DX_DN                                               | 194 | 0.31665164 | 14.581565 | 0.008152174  | 0.015908785 | 1.0 |
| GSE7852  | TREG_VS_TCONV_THYMUS_DN                                                                | 192 | 0.31521553 | 14.571862 | 0.011734028  | 0.016112076 | 1.0 |
| GSE28783 | CTRL_ANTI_MIR_VS_UNTREATED_ATHEROSCLEROSIS_MACROPHAGE_DN                               | 196 | 0.31450516 | 14.569062 | 0.006684492  | 0.016168503 | 1.0 |
| GSE17721 | PAM3CSK4_VS_GADIQUIMOD_16H_BMDM_UP                                                     | 196 | 0.31596413 | 14.567219 | 0.005208333  | 0.016203072 | 1.0 |
| GSE37532 | VISCERAL_ADIPOSE_TISSUE_VS_LN_DERIVED_TCONV_CD4_TCELL_UP                               | 118 | 0.33643335 | 14.556967 | 0.016105417  | 0.016424617 | 1.0 |
| GSE26030 | UNSTIM_VS_RESTIM_TH17_DAYS_POST_POLARIZATION_DN                                        | 191 | 0.31528756 | 1.455513  | 0.010403121  | 0.016457012 | 1.0 |
| GSE33374 | CD8_ALPHAALPHA_VS_ALPHABETA_CD161_HIGH_TCELL_UP                                        | 197 | 0.31543556 | 1.455461  | 0.008        | 0.01645779  | 1.0 |
| GSE27786 | BCELL_VS_CD4_TCELL_DN                                                                  | 188 | 0.3162334  | 14.547687 | 0.009210526  | 0.01659813  | 1.0 |
| GSE18893 | CTRL_VS_TNF_TREATED_TREG_24H_DN                                                        | 187 | 0.31489557 | 1.452396  | 0.00794702   | 0.017150065 | 1.0 |
| GSE12392 | IFNAR_KO_VS_IFNB_KO_CD8_NEG_SPLEEN_DC_DN                                               | 197 | 0.3154797  | 14.520322 | 0.009043927  | 0.017223053 | 1.0 |
| GSE42724 | NAIVE_VS_B1_BCELL_UP                                                                   | 194 | 0.31294745 | 14.512547 | 0.003921569  | 0.017398901 | 1.0 |
| GSE40068 | CXCR5POS_BCL6POS_TFH_VS_CXCR5NEG_BCL6NEG_CD4_TCELL_DN                                  | 195 | 0.31467113 | 1.450965  | 0.012362638  | 0.017445302 | 1.0 |
| GSE22033 | UNTREATED_VS_ROSIGLITAZONE_TREATED_MEF_DN                                              | 188 | 0.31526282 | 14.509802 | 0.011734028  | 0.017455412 | 1.0 |
| GSE2770  | UNTREATED_VS_IL12_TREATED_ACT_CD4_TCELL_48H_UP                                         | 197 | 0.31371263 | 14.506284 | 0.007702182  | 0.017515615 | 1.0 |
| GSE41176 | WT_VS_TAK1_KO_ANTI_IGM_STIM_BCELL_1H_DN                                                | 189 | 0.31466952 | 1.450343  | 0.005333333  | 0.017570123 | 1.0 |
| GSE5589  | UNSTIM_VS_180MIN_LPS_STIM_MACROPHAGE_DN                                                | 191 | 0.31498176 | 14.500539 | 0.009210526  | 0.017628776 | 1.0 |
| GSE3720  | UNSTIM_VS_PMA_STIM_VD1_GAMMADELTA_TCELL_UP                                             | 170 | 0.31746024 | 14.496259 | 0.012178619  | 0.017737504 | 1.0 |
| GSE17721 | CTRL_VS_LPS_2H_BMDM_DN                                                                 | 195 | 0.31402695 | 14.493608 | 0.00390625   | 0.017802043 | 1.0 |
| GSE23984 | CTRL_VS_HYPOCALEMIC_VITAMIND_ANALOG_TCELL_DN                                           | 192 | 0.31575593 | 14.490471 | 0.009655172  | 0.017867047 | 1.0 |
| GSE21360 | SECONDARY_VS_QUATERNARY_MEMORY_CD8_TCELL_DN                                            | 159 | 0.32248664 | 14.486351 | 0.004081632  | 0.017945353 | 1.0 |
| GSE22886 | NAIVE_VS_MEMORY_TCELL_DN                                                               | 199 | 0.31150982 | 14.484942 | 0.005089058  | 0.01797475  | 1.0 |
| GSE27670 | CTRL_VS_LMP1_TRANSDUCED_GC_BCELL_UP                                                    | 198 | 0.31284788 | 1.448264  | 0.003931848  | 0.018014923 | 1.0 |
| GSE6269  | FLU_VS_STAPH_AUREUS_INF_PBMC_DN                                                        | 174 | 0.31658384 | 14.480102 | 0.012048192  | 0.018063461 | 1.0 |
| GSE17721 | LPS_VS_CPG_1H_BMDM_DN                                                                  | 196 | 0.31304845 | 14.476209 | 0.005102040  | 0.018146073 | 1.0 |
| GSE3565  | CTRL_VS_LPS_INJECTED_DUSP1_KO_SPLENOCYTES_DN                                           | 168 | 0.31813484 | 14.475186 | 0.009887005  | 0.018165067 | 1.0 |
| GSE27291 | OH_VS_7D_STIM_GAMMADELTA_TCELL_UP                                                      | 171 | 0.31816584 | 14.458482 | 0.005312085  | 0.01854291  | 1.0 |
| GSE42088 | UNINF_VS_LEISHMANIA_INF_DC_4H_DN                                                       | 196 | 0.3125733  | 14.448893 | 0.007731958  | 0.018770872 | 1.0 |
| GSE29949 | CD8_POS_DC_SPLEEN_VS_MONOCYTE_BONE_MARROW_DN                                           | 197 | 0.30991122 | 14.446084 | 0.007874016  | 0.018827751 | 1.0 |
| GSE41867 | DAY8_VS_DAY15_LCMV_ARMSTRONG_EFFECTOR_CD8_TCELL_UP                                     | 151 | 0.3239435  | 14.444237 | 0.014986376  | 0.018861163 | 1.0 |
| GSE3982  | EOSINOPHIL_VS_NKCELL_UP                                                                | 189 | 0.31296188 | 14.444375 | 0.003942181  | 0.018869026 | 1.0 |
| GOLDRATH | EFF_VS_MEMORY_CD8_TCELL_DN                                                             | 197 | 0.31191838 | 14.442974 | 0.009198423  | 0.01888437  | 1.0 |
| GSE24142 | EARLY_THYMIC_PROGENITOR_VS_DN3_THYMOCYTE_FETAL_DN                                      | 197 | 0.31079072 | 1.444036  | 0.0          | 0.018933283 | 1.0 |
| GSE41867 | DAY8_VS_DAY15_LCMV_CLONE13_EFFECTOR_CD8_TCELL_UP                                       | 191 | 0.31260002 | 14.435288 | 0.008152174  | 0.019045567 | 1.0 |
| GSE36891 | UNSTIM_VS_POLYIC_TLR3_STIM_PERITONEAL_MACROPHAGE_UP                                    | 144 | 0.3255184  | 14.433775 | 0.013661202  | 0.019055977 | 1.0 |
| GSE27786 | LSK_VS_CD8_TCELL_DN                                                                    | 192 | 0.31428024 | 14.434143 | 0.006485084  | 0.019060327 | 1.0 |
| GSE12198 | CTRL_VS_HIGH_IL2_STIM_NK_CELL_DN                                                       | 192 | 0.31152022 | 14.431336 | 0.009222661  | 0.019126868 | 1.0 |
| GSE19941 | UNSTIM_VS_LPS_STIM_IL10_KO_MACROPHAGE_DN                                               | 192 | 0.31063142 | 14.423496 | 0.009333333  | 0.019328838 | 1.0 |
| GSE36476 | YOUNG_VS_OLD_DONOR_MEMORY_CD4_TCELL_DN                                                 | 184 | 0.3145424  | 14.420137 | 0.008141112  | 0.019402305 | 1.0 |
| GSE17580 | TREG_VS_TEFF_S_MANSONI_INF_UP                                                          | 197 | 0.30980915 | 14.413564 | 0.003957784  | 0.019557297 | 1.0 |
| GSE34156 | TLR1_TLR2_LIGAND_VS_NOD2_AND_TLR1_TLR2_LIGAND_6H_TREATED_MONOCYTE_UP                   | 192 | 0.3126811  | 14.410455 | 0.004026845  | 0.01963238  | 1.0 |
| GSE23505 | IL6_IL1_VS_IL6_IL1_IL23_TREATED_CD4_TCELL_DN                                           | 196 | 0.31051016 | 14.407239 | 0.003875969  | 0.019705541 | 1.0 |
| GSE3982  | EOSINOPHIL_VS_EFF_MEMORY_CD4_TCELL_UP                                                  | 189 | 0.3155115  | 14.406059 | 0.009536785  | 0.019721624 | 1.0 |
| GSE21678 | WT_VS_FOXO1_FOXO3_KO_TREG_UP                                                           | 179 | 0.31467688 | 14.403987 | 0.006666667  | 0.01976191  | 1.0 |
| GSE10147 | IL3_VS_IL3_AND_HIVP17_STIM_PDC_DN                                                      | 138 | 0.32691833 | 14.402843 | 0.008174387  | 0.019780287 | 1.0 |
| GSE28783 | ANTI_MIR33_VS_UNTREATED_ATHEROSCLEROSIS_MACROPHAGE_UP                                  | 193 | 0.3100461  | 14.389873 | 0.006729475  | 0.020113604 | 1.0 |
| GSE5142  | HTERT_TRANSDUCED_VS_CTRL_CD8_TCELL_LATE_PASSAGE_CLONE_DN                               | 192 | 0.31221592 | 14.387056 | 0.002638522  | 0.020169653 | 1.0 |
| GSE6092  | IFNG_VS_IFNG_AND_B_BURGDORFERI_INF_ENDOTHELIAL_CELL_UP                                 | 173 | 0.31647393 | 14.384648 | 0.005340454  | 0.020217359 | 1.0 |
| GSE29164 | CD8_TCELL_VS_CD8_TCELL_AND_IL12_TREATED_MELANOMA_DAY3_DN                               | 196 | 0.31221166 | 14.376979 | 0.009198423  | 0.02040198  | 1.0 |
| GSE1925  | CTRL_VS_3H_IFNG_STIM_IFNG_PRIMED_MACROPHAGE_DN                                         | 193 | 0.31047428 | 14.376447 | 0.011568123  | 0.020404518 | 1.0 |
| GSE17186 | NAIVE_VS_CD21HIGH_TRANSITIONAL_BCELL_CORD_BLOOD_DN                                     | 191 | 0.30963925 | 1.437705  | 0.005208333  | 0.020412453 | 1.0 |
| GSE45365 | CTRL_VS_MCMV_INFECTION_NK_CELL_UP                                                      | 196 | 0.31231725 | 14.375345 | 0.007894737  | 0.02042587  | 1.0 |
| GSE29618 | PRE_VS_DAY7_POST_TIV_FLU_VACCINE_MDC_UP                                                | 194 | 0.31028813 | 14.367508 | 0.010526316  | 0.020629643 | 1.0 |
| GSE6875  | WT_VS_FOXP3_KO_TREG_UP                                                                 | 188 | 0.3110798  | 1.436214  | 0.005263158  | 0.020774921 | 1.0 |
| GSE6092  | CTRL_VS_BORRELIA_BIRGDORFERI_INF_ENDOTHELIAL_CELL_DN                                   | 142 | 0.32462636 | 14.355066 | 0.016830295  | 0.020972332 | 1.0 |
| GSE13411 | SWITCHED_MEMORY_BCELL_VS_PLASMA_CELL_DN                                                | 189 | 0.31144908 | 14.351408 | 0.006657789  | 0.021038493 | 1.0 |
| GSE17721 | CTRL_VS_LPS_1H_BMDM_DN                                                                 | 194 | 0.31032366 | 1.435184  | 0.006443299  | 0.021039927 | 1.0 |
| GSE37532 | TREG_VS_TCONV_CD4_TCELL_FROM_LN_DN                                                     | 194 | 0.31323275 | 14.350677 | 0.007672634  | 0.021043008 | 1.0 |
| GSE45365 | WT_VS_IFNAR_KO_CD8A_DC_DN                                                              | 197 | 0.31304583 | 14.348775 | 0.007894737  | 0.021082802 | 1.0 |
| GSE40277 | EOS_AND_LEF1_TRANSDUCED_VS_CTRL_CD4_TCELL_UP                                           | 196 | 0.3124586  | 14.339191 | 0.015424165  | 0.021331342 | 1.0 |
| GSE23321 | CD8_STEM_CELL_MEMORY_VS_CENTRAL_MEMORY_CD8_TCELL_UP                                    | 193 | 0.31058496 | 14.336786 | 0.005524862  | 0.021383846 | 1.0 |
| GSE17721 | LPS_VS_PAM3CSK4_24H_BMDM_DN                                                            | 192 | 0.31040925 | 14.334803 | 0.009222661  | 0.021415837 | 1.0 |
| GSE40685 | NAIVE_CD4_TCELL_VS_TREG_DN                                                             | 188 | 0.30920848 | 14.335268 | 0.002577319  | 0.021416293 | 1.0 |
| GSE28737 | WT_VS_BCL6_KO_FOLLICULAR_BCELL_UP                                                      | 192 | 0.31104735 | 14.333049 | 0.005277045  | 0.021443516 | 1.0 |
| GSE17186 | BLOOD_VS_CORD_BLOOD_CD21HIGH_TRANSITIONAL_BCELL_DN                                     | 191 | 0.31343052 | 14.330373 | 0.008163265  | 0.021511678 | 1.0 |
| GSE2770  | IL12_VS_TGFB_AND_IL12_TREATED_ACT_CD4_TCELL_6H_UP                                      | 187 | 0.3127388  | 14.319365 | 0.006684492  | 0.021793693 | 1.0 |
| GSE19888 | ADENOSINE_A3R_INH_PRETREAT_AND_ACT_BY_A3R_VS_A3R_INH_AND_TCELL_MEMBRANES_ACT_MAST_CELL | 174 | 0.31275702 | 14.319656 | 0.012228261  | 0.021795532 | 1.0 |
| GSE9509  | 10MIN_VS_30MIN_LPS_STIM_IL10_KO_MACROPHAGE_UP                                          | 192 | 0.31158388 | 14.313091 | 0.005242464  | 0.021956414 | 1.0 |
| GSE6092  | B_BURGDORFERI_VS_B_BURGDORFERI_AND_IFNG_STIM_ENDOTHELIAL_CELL_DN                       | 175 | 0.3138617  | 14.308484 | 0.00802139   | 0.022065084 | 1.0 |
| GSE15330 | HSC_VS_MEGAKARYOCYTE_ERYTHROID_PROGENITOR_DN                                           | 165 | 0.3127944  | 1.430434  | 0.017663043  | 0.02216884  | 1.0 |
| GSE5142  | CTRL_VS_HTERT_TRANSDUCED_CD8_TCELL_EARLY_PASSAGE_CLONE_DN                              | 193 | 0.3107672  | 14.302331 | 0.007843138  | 0.022197975 | 1.0 |
| GSE37301 | HEMATOPOIETIC_STEM_CELL_VS_COMMON_LYMPHOID_PROGENITOR_UP                               | 185 | 0.31165084 | 14.302609 | 0.011968086  | 0.022206463 | 1.0 |
| GSE20366 | TREG_VS_NAIVE_CD4_TCELL_UP                                                             | 194 | 0.308033   | 14.300476 | 0.006635948  | 0.02221335  | 1.0 |
| GSE360   | L_DONOVANI_VS_B_MALAYI_HIGH_DOSE_DC_DN                                                 | 198 | 0.3072391  | 14.301314 | 0.014175258  | 0.022213455 | 1.0 |
| GSE19941 | UNSTIM_VS_LPS_STIM_IL10_KO_NFKBP50_KO_MACROPHAGE_DN                                    | 194 | 0.30715236 | 14.300563 | 0.009198423  | 0.02225337  | 1.0 |

|                                                                                  |     |            |            |             |             |     |
|----------------------------------------------------------------------------------|-----|------------|------------|-------------|-------------|-----|
| GSE19401_UNSTIM_VS_PAM2CSK4_STIM_FOLLICULAR_DC_DN                                | 194 | 0.31170797 | 14.298.226 | 0.006485084 | 0.022261424 | 1.0 |
| GSE9037_CTRL_VS_LPS_4H_STIM_IRAK4_KO_BMDM_DN                                     | 194 | 0.30927417 | 14.296.488 | 0.001307189 | 0.022282893 | 1.0 |
| GSE3982_EFF_MEMORY_CD4_TCELL_VS_TH1_UP                                           | 187 | 0.30939445 | 14.296.764 | 0.011703511 | 0.02228675  | 1.0 |
| GSE24972_MARGINAL_ZONE_BCELL_VS_FOLLICULAR_BCELL_DN                              | 195 | 0.30541292 | 14.281.683 | 0.009126467 | 0.022715336 | 1.0 |
| GSE22935_UNSTIM_VS_48H_MBOVIS_BCG_STIM_MYD88_KO_MACROPHAGE_DN                    | 193 | 0.30935997 | 142.817    | 0.007968128 | 0.022728162 | 1.0 |
| GSE360_L_MAJOR_VS_B_MALAYI_HIGH_DOSE_DC_UP                                       | 195 | 0.30751404 | 14.279.507 | 0.007722007 | 0.02276361  | 1.0 |
| GSE43863_TH1_VS_LY6C_INT_CXCR5POS_EFFECTOR_CD4_TCELL_DN                          | 195 | 0.30760202 | 14.277.864 | 0.010471204 | 0.022782624 | 1.0 |
| GSE15330_LYMPHOID_MULTIPOTENT_VS_MEGAKARYOCYTE_ERYTHROID_PROGENITOR_IKAROS_KO_UP | 164 | 0.3174513  | 14.277.871 | 0.016172506 | 0.02279605  | 1.0 |
| GSE6269_HEALTHY_VS_E_COLI_INF_PBMC_UP                                            | 167 | 0.31335297 | 14.263.777 | 0.006702413 | 0.02318848  | 1.0 |
| GSE13484_UNSTIM_VS_12H_YF17D_VACCINE_STIM_PBMC_DN                                | 196 | 0.30945554 | 14.263.378 | 0.01303781  | 0.023189312 | 1.0 |
| GSE18804_BRAIN_VS_COLON_TUMORAL_MACROPHAGE_UP                                    | 182 | 0.31076548 | 14.261.688 | 0.009497965 | 0.023229009 | 1.0 |
| GSE22919_RESTING_VS_IL2_IL12_IL15_STIM_NK_CELL_DN                                | 189 | 0.3096493  | 14.260.164 | 0.014765101 | 0.023270946 | 1.0 |
| GSE20484_MCSG_VS_CXCL4_MONOCYTE_DERIVED_MACROPHAGE_DN                            | 189 | 0.30990186 | 14.259.117 | 0.011749348 | 0.023276076 | 1.0 |
| GSE41867_NAIVE_VS_DAY15_LCMV_EFFECTOR_CD8_TCELL_DN                               | 189 | 0.3094106  | 14.259.155 | 0.012953368 | 0.023289172 | 1.0 |
| GSE21063_CTRL_VS_ANTI_IGM_STIM_BCELL_16H_DN                                      | 192 | 0.3083777  | 14.258.165 | 0.01511335  | 0.023291936 | 1.0 |
| GSE3720_UNSTIM_VS_LPS_STIM_VD2_GAMMADelta_TCELL_DN                               | 143 | 0.31888542 | 1.425.342  | 0.01458886  | 0.02341623  | 1.0 |
| GSE8921_UNSTIM_OH_VS_TLR1_2_STIM_MONOCYTE_24H_UP                                 | 188 | 0.31005523 | 1.425.286  | 0.011673151 | 0.023419242 | 1.0 |
| GSE5589_WT_VS_IL6_KO_LPS_AND_IL10_STIM_MACROPHAGE_180MIN_UP                      | 98  | 0.34152472 | 14.252.179 | 0.03085554  | 0.023421124 | 1.0 |
| GSE10240_IL17_VS_IL17_AND_IL22_STIM_PRIMARY_BRONCHIAL_EPITHELIAL_CELLS_UP        | 192 | 0.30836576 | 14.249.947 | 0.005305039 | 0.023473158 | 1.0 |
| GSE25087_FETAL_VS_ADULT_TREG_DN                                                  | 178 | 0.31069043 | 14.244.559 | 0.018445322 | 0.023635741 | 1.0 |
| GSE18203_CTRL_VS_INTRATUMORAL_CPG_INJ_MC38_TUMOR_UP                              | 191 | 0.30786481 | 14.229.113 | 0.009174311 | 0.02408366  | 1.0 |
| GSE43955_TH0_VS_TGFB_IL6_TH17_ACT_CD4_TCELL_10H_DN                               | 194 | 0.30649212 | 14.228.355 | 0.009358289 | 0.024090875 | 1.0 |
| GSE7568_CTRL_VS_24H_TGFB_TREATED_MACROPHAGES_WITH_IL4_AND_DEXAMETHASONE_DN       | 195 | 0.30816182 | 14.224.854 | 0.011984021 | 0.024187788 | 1.0 |
| GSE24081_CONTROLLER_VS_PROGRESSOR_HIV_SPECIFIC_CD8_TCELL_UP                      | 189 | 0.30780497 | 14.212.884 | 0.009345794 | 0.024553774 | 1.0 |
| GSE41978_WT_VS_BIM_KO_KLRG1_LOW_EFFECTOR_CD8_TCELL_UP                            | 195 | 0.3061415  | 14.207.724 | 0.010638298 | 0.024721524 | 1.0 |
| GSE40666_UNTREATED_VS_IFNA_STIM_STAT4_KO_EFFECTOR_CD8_TCELL_90MIN_DN             | 191 | 0.30570635 | 14.201.614 | 0.009210526 | 0.02491728  | 1.0 |
| GSE39864_WT_VS_GATA3_KO_TREG_UP                                                  | 198 | 0.30969104 | 14.201.027 | 0.010512483 | 0.024926307 | 1.0 |
| GSE22886_TH1_VS_TH2_48H_ACT_UP                                                   | 192 | 0.30951777 | 14.199.768 | 0.009150327 | 0.024938058 | 1.0 |
| GSE27434_WT_VS_DNMT1_KO_TREG_DN                                                  | 196 | 0.30644774 | 14.200.006 | 0.010568032 | 0.024944508 | 1.0 |
| GSE16697_CD4_TCELL_VS_TFH_CD4_TCELL_DN                                           | 193 | 0.30888    | 14.197.327 | 0.013123359 | 0.02499692  | 1.0 |
| GSE17721_LPS_VS_POLYIC_16H_BMDM_DN                                               | 190 | 0.30710566 | 14.193.358 | 0.006622516 | 0.02511522  | 1.0 |
| GSE3982_MAC_VS_CENT_MEMORY_CD4_TCELL_DN                                          | 187 | 0.30679816 | 14.191.881 | 0.010256411 | 0.025148153 | 1.0 |
| GSE17721_0.5H_VS_4H_CPG_BMDM_DN                                                  | 194 | 0.30699536 | 1.418.831  | 0.01462766  | 0.025221925 | 1.0 |
| GSE1448_CTRL_VS_ANTI_VALPHA2_DP_THYMOCYTE_DN                                     | 194 | 0.30563253 | 14.188.691 | 0.002580645 | 0.025226831 | 1.0 |
| GSE2770_UNTREATED_VS_ACT_CD4_TCELL_6H_UP                                         | 188 | 0.3087766  | 14.182.842 | 0.01171875  | 0.025378108 | 1.0 |
| GSE18893_TCONV_VS_TREG_2H_CULTURE_DN                                             | 194 | 0.30973884 | 14.177.547 | 0.006459948 | 0.025542734 | 1.0 |
| GSE36095_WT_VS_HDAC9_KO_TREG_DN                                                  | 115 | 0.3329564  | 14.174.366 | 0.011267605 | 0.02564093  | 1.0 |
| GSE9988_ANTI_TREM1_VS_ANTI_TREM1_AND_LPS_MONOCYTE_UP                             | 190 | 0.30783683 | 14.172.819 | 0.006459948 | 0.025675701 | 1.0 |
| GSE16385_UNTREATED_VS_12H_IL4_TREATED_MACROPHAGE_UP                              | 193 | 0.3125385  | 14.170.607 | 0.010989011 | 0.025730358 | 1.0 |
| GSE26488_WT_VS_HDAC7_DELTA_TG_OT2_THYMOCYTE_WITH_PEPTIDE_INJECTION_UP            | 197 | 0.3043117  | 14.168.978 | 0.014304291 | 0.025759913 | 1.0 |
| GSE37301_HEMATOPOIETIC_STEM_CELL_VS_CD4_TCELL_DN                                 | 129 | 0.32434654 | 14.167.355 | 0.019417476 | 0.02579682  | 1.0 |
| GSE6259_33D1_POS_DC_VS_BCELL_DN                                                  | 142 | 0.3203884  | 14.166.162 | 0.024623804 | 0.02582062  | 1.0 |
| GSE22601_DOUBLE_NEGATIVE_VS_CD4_SINGLE_POSITIVE_THYMOCYTE_UP                     | 193 | 0.30816886 | 1.416.294  | 0.010269577 | 0.025903046 | 1.0 |
| GSE6259_33D1_POS_VS_DEC205_POS_FLT3L_INDUCED_SPLENIC_DC_UP                       | 169 | 0.3099391  | 14.157.088 | 0.009615385 | 0.026079698 | 1.0 |
| GSE3982_DC_VS_TH1_DN                                                             | 196 | 0.3057646  | 14.154.379 | 0.005235602 | 0.026136972 | 1.0 |
| GSE6674_UNSTIM_VS_PL2_3_STIM_BCELL_DN                                            | 165 | 0.3132304  | 14.154.383 | 0.01510989  | 0.026152037 | 1.0 |
| GSE8685_IL2_STARVED_VS_IL2_ACT_IL2_STARVED_CD4_TCELL_UP                          | 192 | 0.30441377 | 14.144.331 | 0.006640106 | 0.026468145 | 1.0 |
| GSE45739_NRAS_KO_VS_WT_UNSTIM_CD4_TCELL_DN                                       | 181 | 0.307298   | 1.414.231  | 0.013192612 | 0.026514776 | 1.0 |
| GSE13229_IMM_VS_MATURE_NKCELL_DN                                                 | 189 | 0.30920658 | 14.140.323 | 0.009222661 | 0.0265725   | 1.0 |
| GSE2706_2H_VS_8H_LPS_STIM_DC_UP                                                  | 191 | 0.3071875  | 14.137.491 | 0.012903226 | 0.026658673 | 1.0 |
| GSE19198_1H_VS_6H_IL21_TREATED_TCELL_DN                                          | 197 | 0.30439615 | 14.135.91  | 0.017038008 | 0.026703976 | 1.0 |
| GSE17721_LPS_VS_PAM3CSK4_12H_BMDM_UP                                             | 193 | 0.30513585 | 14.135.135 | 0.007989348 | 0.026716841 | 1.0 |
| GSE3982_MAC_VS_EFF_MEMORY_CD4_TCELL_DN                                           | 186 | 0.30878115 | 14.132.631 | 0.015645372 | 0.026775658 | 1.0 |
| GSE10240_CTRL_VS_IL17_STIM_PRIMARY_BRONCHIAL_EPITHELIAL_CELLS_DN                 | 196 | 0.30837202 | 1.412.711  | 0.014210667 | 0.026934164 | 1.0 |
| GSE17721_POLYIC_VS_GARDIQUIMOD_12H_BMDM_UP                                       | 189 | 0.30440032 | 14.127.506 | 0.014647137 | 0.026937168 | 1.0 |
| GSE22025_UNTREATED_VS_TGFB1_AND_PROGESTERONE_TREATED_CD4_TCELL_UP                | 193 | 0.3045257  | 1.412.314  | 0.006684492 | 0.027071122 | 1.0 |
| GSE19512_NAURAL_VS_INDUCED_TREG_DN                                               | 194 | 0.3042881  | 1.411.842  | 0.016064256 | 0.027214892 | 1.0 |
| GSE37532_VISCERAL_ADIPOSE_TISSUE_VS_LN_DERIVED_TREG_CD4_TCELL_DN                 | 146 | 0.31918058 | 1.411.876  | 0.016129032 | 0.027219737 | 1.0 |
| GSE21927_HEALTHY_VS_TUMOROUS_BALBC_MOUSE_MONOCYTE_DN                             | 159 | 0.3167279  | 14.110.608 | 0.020604396 | 0.027483856 | 1.0 |
| GSE3565_CTRL_VS_LPS_INJECTED_SPLENOCYTES_DN                                      | 171 | 0.31117022 | 14.109.492 | 0.017931035 | 0.02749402  | 1.0 |
| GSE27786_LSK_VS_NEUTROPHIL_DN                                                    | 194 | 0.3042256  | 14.109.799 | 0.01193634  | 0.027499635 | 1.0 |
| GSE6269_E_COLI_VS_STREP_PNEUMO_INF_PBMC_UP                                       | 157 | 0.31420526 | 14.108.335 | 0.020746889 | 0.02751824  | 1.0 |
| GSE27786_CD8_TCELL_VS_NKTCELL_DN                                                 | 191 | 0.30532935 | 14.106.919 | 0.0078125   | 0.027557608 | 1.0 |
| GSE17721_LPS_VS_GARDIQUIMOD_0.5H_BMDM_UP                                         | 195 | 0.30530378 | 14.105.945 | 0.012064343 | 0.027574476 | 1.0 |
| GSE13522_CTRL_VS_T_CRUZI_Y_STRAIN_INF_SKIN_IFNG_KO_DN                            | 133 | 0.31918734 | 14.103.185 | 0.022630835 | 0.027651452 | 1.0 |
| GSE32255_WT_UNSTIM_VS_JMJD2D_KNOCKDOWN_4H_LPS_STIM_DC_UP                         | 168 | 0.30960447 | 14.097.614 | 0.023841059 | 0.027810728 | 1.0 |
| GSE15930_NAIVE_VS_24H_IN_VITRO_STIM_CD8_TCELL_UP                                 | 198 | 0.30297002 | 14.095.908 | 0.005201560 | 0.027866786 | 1.0 |
| GSE9988_LPS_VS_LPS_AND_ANTI_TREM1_MONOCYTE_DN                                    | 179 | 0.3063509  | 1.409.396  | 0.013422819 | 0.027919319 | 1.0 |
| GSE14699_NAIVE_VS_ACT_CD8_TCELL_DN                                               | 172 | 0.30785233 | 1.409.242  | 0.015625    | 0.027952835 | 1.0 |
| GSE25677_MPL_VS_MPL_AND_R848_STIM_BCELL_DN                                       | 117 | 0.32691988 | 14.091.513 | 0.02467344  | 0.027970506 | 1.0 |
| GSE3982_DC_VS_BASOPHIL_UP                                                        | 190 | 0.30574757 | 14.083.503 | 0.011857707 | 0.028218744 | 1.0 |
| GSE13411_NAIVE_VS_IGM_MEMORY_BCELL_UP                                            | 187 | 0.30950454 | 14.079.798 | 0.013020833 | 0.028341979 | 1.0 |
| GSE3982_MAC_VS_BCELL_DN                                                          | 189 | 0.30608693 | 14.077.159 | 0.018041236 | 0.02842875  | 1.0 |
| GSE15930_NAIVE_VS_48H_IN_VITRO_STIM_IL12_CD8_TCELL_UP                            | 194 | 0.30344933 | 14.072.989 | 0.019607844 | 0.028565634 | 1.0 |
| GSE10147_IL3_AND_HIVP17_VS_IL3_AND_CPG_STIM_PDC_UP                               | 147 | 0.3169051  | 1.406.809  | 0.015789473 | 0.028742637 | 1.0 |
| GSE19941_IL10_KO_VS_IL10_KO_AND_NFKBP50_KO_LPS_AND_IL10_STIM_MACROPHAGE_UP       | 196 | 0.30566183 | 14.067.295 | 0.014360313 | 0.028752076 | 1.0 |
| GSE17721_PAM3CSK4_VS_GADIQUIMOD_6H_BMDM_DN                                       | 192 | 0.30606    | 14.062.763 | 0.010403121 | 0.028881896 | 1.0 |
| GSE43955_1H_VS_20H_ACT_CD4_TCELL_DN                                              | 193 | 0.3037789  | 14.060.081 | 0.013280213 | 0.028968703 | 1.0 |
| GSE14000_UNSTIM_VS_16H_LPS_DC_TRANSLATED_RNA_UP                                  | 186 | 0.30516768 | 14.058.375 | 0.012987013 | 0.0290208   | 1.0 |
| GSE22611_MUTANT_NOD2_TRANSDUCECD_VS_CTRL_HEK293T_STIMULATED_WITH_MDP_6H_UP       | 185 | 0.30731755 | 14.053.937 | 0.018348623 | 0.029168155 | 1.0 |
| GSE2128_C57BL6_VS_NOD_THYMOCYTE_MIMETOPE_NEGATIVE_SELECTION_UP                   | 196 | 0.30400676 | 14.050.208 | 0.009174311 | 0.029257571 | 1.0 |
| GSE30971_CTRL_VS_LPS_STIM_MACROPHAGE_WBP7_KO_4H_UP                               | 180 | 0.30628598 | 14.050.587 | 0.016       | 0.029259056 | 1.0 |
| GSE7460_TREG_VS_TCONV_ACT_WITH_TGFB_UP                                           | 190 | 0.30545405 | 14.046.855 | 0.011538462 | 0.029365616 | 1.0 |
| GSE13411_SWITCHED_MEMORY_BCELL_VS_PLASMA_CELL_UP                                 | 189 | 0.30194795 | 14.044.857 | 0.01458886  | 0.029423613 | 1.0 |
| GSE13522_WT_VS_IFNG_KO_SKIN_UP                                                   | 120 | 0.32449567 | 14.040.126 | 0.02312925  | 0.029568085 | 1.0 |
| GSE7548_DAY7_VS_DAY28_PCC_IMMUNIZATION_CD4_TCELL_DN                              | 194 | 0.30691236 | 14.037.702 | 0.009032258 | 0.029647432 | 1.0 |
| GSE26928_NAIVE_VS_CENT_MEMORY_CD4_TCELL_DN                                       | 179 | 0.30417275 | 14.023.502 | 0.015665796 | 0.030176878 | 1.0 |
| GSE37563_WT_VS_CTLA4_KO_CD4_TCELL_D4_POST_IMMUNIZATION_UP                        | 156 | 0.3097802  | 14.019.848 | 0.013908206 | 0.030298542 | 1.0 |
| GSE21380_TFH_VS_GERMINAL_CENTER_TFH_CD4_TCELL_UP                                 | 193 | 0.30465695 | 14.017.003 | 0.011764706 | 0.030390756 | 1.0 |

|                                                                            |     |            |            |             |             |     |
|----------------------------------------------------------------------------|-----|------------|------------|-------------|-------------|-----|
| GSE33425_CD161_HIGH_VS_NEG_CD8_TCELL_UP                                    | 199 | 0.30333793 | 14.014.734 | 0.015228426 | 0.03045456  | 1.0 |
| GSE15330_WT_VS_IKAROS_KO_HSC_UP                                            | 197 | 0.30254424 | 14.012.583 | 0.015936255 | 0.030502751 | 1.0 |
| GSE1460_NAIVE_CD4_TCELL_ADULT_BLOOD_VS_THYMIC_STROMAL_CELL_DN              | 191 | 0.30626592 | 14.011.968 | 0.008010681 | 0.030509464 | 1.0 |
| GSE43955_TH0_VS_TGFB_IL6_TH17_ACT_CD4_TCELL_42H_DN                         | 198 | 0.30313787 | 14.012.666 | 0.005284016 | 0.030517096 | 1.0 |
| GSE46606_IRF4HIGH_VS_IRF4MID_CD40L_IL2_IL5_DAY3_STIMULATED_BCELL_DN        | 193 | 0.30311337 | 14.011.085 | 0.018276762 | 0.030521117 | 1.0 |
| GSE2197_CPG_DNA_VS_UNTREATED_IN_DC_UP                                      | 192 | 0.30219752 | 14.008.769 | 0.01660281  | 0.03056856  | 1.0 |
| GSE17721_PAM3CSK4_VS_CPG_16H_BMDM_DN                                       | 193 | 0.29970732 | 14.009.217 | 0.010471204 | 0.03056971  | 1.0 |
| GSE45739_NRAS_KO_VS_WT_ACD3_ACD28_STIM_CD4_TCELL_DN                        | 185 | 0.30527693 | 14.007.962 | 0.018181818 | 0.030581811 | 1.0 |
| GSE22196_HEALTHY_VS_OBESE_MOUSE_SKIN_GAMMADDELTA_TCELL_DN                  | 198 | 0.3026267  | 14.005.706 | 0.011795544 | 0.030645201 | 1.0 |
| GSE22432_MULTIPOTENT_PROGENITOR_VS_PDC_UP                                  | 191 | 0.30366663 | 14.004.033 | 0.016949153 | 0.030686403 | 1.0 |
| GSE15930_STIM_VS_STIM_AND_TRICHOSTATINA_24H_CD8_T_CELL_UP                  | 196 | 0.30076635 | 14.000.285 | 0.014511873 | 0.030811308 | 1.0 |
| GSE22935_UNSTIM_VS_48H_MBOVIS_BCG_STIM_MACROPHAGE_DN                       | 197 | 0.30235273 | 13.999.319 | 0.006675567 | 0.030831054 | 1.0 |
| GSE27786_LSK_VS_NKCELL_DN                                                  | 190 | 0.30248415 | 13.998.158 | 0.015483871 | 0.030855067 | 1.0 |
| GSE20366_EX_VIVO_VS_DEC205_CONVERSION_DN                                   | 189 | 0.30568138 | 1.399.708  | 0.018494055 | 0.03087468  | 1.0 |
| GSE22886_NAIVE_CD8_TCELL_VS_MEMORY_TCELL_UP                                | 185 | 0.3014954  | 13.991.797 | 0.021333333 | 0.031046169 | 1.0 |
| GSE7460_TCONV_VS_TREG_THYMUS_UP                                            | 195 | 0.30231133 | 13.991.082 | 0.011749348 | 0.031053595 | 1.0 |
| GSE6259_BCELL_VS_CD8_TCELL_DN                                              | 181 | 0.30734405 | 13.984.201 | 0.01193634  | 0.031281795 | 1.0 |
| GSE6259_33D1_POS_VS_DEC205_POS_SPLENIC_DC_DN                               | 188 | 0.30357307 | 13.984.435 | 0.012278308 | 0.031291    | 1.0 |
| GSE11386_NAIVE_VS_MEMORY_BCELL_DN                                          | 154 | 0.3100867  | 13.983.117 | 0.014304291 | 0.03130273  | 1.0 |
| GSE9316_CD4_TCELL_BALBC_VS_TH17_ENRI_CD4_TCELL_SKG_PMA_IONO_STIM_FR4NEG_DN | 196 | 0.30358312 | 13.977.224 | 0.007905139 | 0.031512514 | 1.0 |
| GSE360_CTRL_VS_L_MAJOR_DC_UP                                               | 194 | 0.2996801  | 13.975.383 | 0.01759134  | 0.031531114 | 1.0 |
| GSE27670_CTRL_VS_LMP1_TRANSDUCED_GC_BCELL_DN                               | 197 | 0.30306828 | 13.976.128 | 0.009433962 | 0.03154095  | 1.0 |
| GSE40274_CTRL_VS_FOXP3_AND_SATB1_TRANSDUCED_ACTIVATED_CD4_TCELL_UP         | 158 | 0.30998263 | 139.754    | 0.024324324 | 0.031547528 | 1.0 |
| GSE9650_EXHAUSTED_VS_MEMORY_CD8_TCELL_UP                                   | 193 | 0.3039311  | 13.973.653 | 0.006811989 | 0.03156817  | 1.0 |
| GSE22033_WT_VS_PPARG_KO_MEF_UP                                             | 188 | 0.30698273 | 1.396.486  | 0.014435695 | 0.03189975  | 1.0 |
| GSE17721_0.5H_VS_8H_LPS_BMDM_DN                                            | 193 | 0.30257905 | 13.964.301 | 0.012064343 | 0.0319006   | 1.0 |
| GSE17721_LPS_VS_GARDIQUIMOD_12H_BMDM_UP                                    | 190 | 0.30183885 | 13.962.088 | 0.023746701 | 0.031978365 | 1.0 |
| GSE5542_UNTREATED_VS_IFNG_TREATED_EPITHELIAL_CELLS_6H_UP                   | 181 | 0.30362636 | 13.958.007 | 0.018276762 | 0.03210323  | 1.0 |
| GSE19772_CTRL_VS_HCMV_INF_MONOCYTES_DN                                     | 167 | 0.31141052 | 13.958.482 | 0.015006628 | 0.032105707 | 1.0 |
| GSE45881_CXCR6HI_VS_CXCR1LO_COLONIC_LAMINA_PROPRIA_UP                      | 194 | 0.30214614 | 13.957.467 | 0.022457067 | 0.032107256 | 1.0 |
| GSE41978_KLRG1_HIGH_VS_LOW_EFFECTOR_CD8_TCELL_UP                           | 197 | 0.29949197 | 13.955.423 | 0.007915568 | 0.03217507  | 1.0 |
| GSE9006_TYPE_1_DIABETES_AT_DX_VS_4MONTH_POST_DX_PBMIC_UP                   | 197 | 0.3016992  | 13.952.602 | 0.006459948 | 0.03227155  | 1.0 |
| GSE17974_0H_VS_1H_IN_VITRO_ACT_CD4_TCELL_DN                                | 179 | 0.30650088 | 13.948.938 | 0.009138381 | 0.032409344 | 1.0 |
| GSE8835_CD4_VS_CD8_TCELL_DN                                                | 193 | 0.30352703 | 13.943.577 | 0.011857707 | 0.032619756 | 1.0 |
| GSE13547_WT_VS_ZFX_KO_BCELL_ANTI_IGM_STIM_2H_DN                            | 153 | 0.31148356 | 13.940.367 | 0.022849463 | 0.032738168 | 1.0 |
| GSE43955_1H_VS_20H_ACT_CD4_TCELL_UP                                        | 196 | 0.29976717 | 13.939.008 | 0.009259259 | 0.0327863   | 1.0 |
| GSE40274_FOXP3_VS_FOXP3_AND_XBP1_TRANSDUCED_ACTIVATED_CD4_TCELL_UP         | 146 | 0.313459   | 13.936.747 | 0.018918918 | 0.032847974 | 1.0 |
| GSE42021_CD24HI_TREG_VS_CD24HI_TCONV_THYMUS_DN                             | 197 | 0.29820916 | 13.935.503 | 0.010484928 | 0.03286229  | 1.0 |
| GSE17301_CTRL_VS_48H_ACD3_ACD28_STIM_CD8_TCELL_UP                          | 196 | 0.30175292 | 1.393.573  | 0.017038008 | 0.032872234 | 1.0 |
| GSE30153_LUPUS_VS_HEALTHY_DONOR_BCELL_DN                                   | 194 | 0.29990926 | 13.929.667 | 0.015957447 | 0.0330909   | 1.0 |
| GSE22025_PROGESTERONE_VS_TGFB1_AND_PROGESTERONE_TREATED_CD4_TCELL_DN       | 193 | 0.301568   | 13.929.156 | 0.012594459 | 0.03309114  | 1.0 |
| GSE34515_CD16_NEG_VS_POS_MONOCYTE_UP                                       | 192 | 0.30251032 | 13.928.058 | 0.02254642  | 0.033116266 | 1.0 |
| GSE9509_10MIN_VS_30MIN_LPS_AND_IL10_STIM_IL10_KO_MACROPHAGE_DN             | 154 | 0.3109244  | 13.926.125 | 0.02328767  | 0.03317434  | 1.0 |
| GSE5589_LPS_VS_LPS_AND_IL6_STIM_IL6_KO_MACROPHAGE_45MIN_DN                 | 193 | 0.30245167 | 13.924.414 | 0.020053476 | 0.03321939  | 1.0 |
| GSE45365_HEALTHY_VS_MCMV_INFECTION_BCELL_DN                                | 160 | 0.30773783 | 13.914.356 | 0.021828104 | 0.03364261  | 1.0 |
| GSE17186_BLOOD_VS_CORD_BLOOD_CD21LOW_TRANSITIONAL_BCELL_UP                 | 192 | 0.29949468 | 13.910.906 | 0.022818793 | 0.033768807 | 1.0 |
| GSE20727_DNFB_ALLERGEN_VS_ROS_INH_AND_DNFB_ALLERGEN_TREATED_DC_UP          | 177 | 0.3044512  | 13.908.505 | 0.017567568 | 0.033852413 | 1.0 |
| GSE45365_HEALTHY_VS_MCMV_INFECTION_CD8_TCELL_IFNAR_KO_DN                   | 163 | 0.3060809  | 13.904.223 | 0.030261349 | 0.034028415 | 1.0 |
| GSE29949_DC_BRAIN_VS_MONOCYTE_BONE_MARROW_DN                               | 192 | 0.30179387 | 13.902.016 | 0.011464968 | 0.03411436  | 1.0 |
| GSE11961_GERMINAL_CENTER_BCELL_DAY7_VS_PLASMA_CELL_DAY7_DN                 | 191 | 0.3018624  | 13.896.238 | 0.018348623 | 0.03434734  | 1.0 |
| GSE27786_BCELL_VS_NKCELL_DN                                                | 190 | 0.3015906  | 13.888.954 | 0.01310616  | 0.034599822 | 1.0 |
| GSE24972_WT_VS_IRF8_KO_MARGINAL_ZONE_SPLEEN_BCELL_UP                       | 193 | 0.3005962  | 13.886.476 | 0.01894452  | 0.034688435 | 1.0 |
| GSE17721_LPS_VS_GARDIQUIMOD_1H_BMDM_UP                                     | 193 | 0.30011216 | 13.886.617 | 0.014511873 | 0.034702025 | 1.0 |
| GSE7348_UNSTIM_VS_LPS_STIM_MACROPHAGE_UP                                   | 146 | 0.3132736  | 13.883.532 | 0.021216407 | 0.034753118 | 1.0 |
| GSE7852_LN_VS_FAT_TREG_DN                                                  | 194 | 0.30100784 | 13.883.873 | 0.01142132  | 0.034756497 | 1.0 |
| GSE4142_NAIVE_BCELL_VS_PLASMA_CELL_UP                                      | 191 | 0.29978698 | 13.883.905 | 0.01591512  | 0.034774378 | 1.0 |
| GSE27786_BCELL_VS_NEUTROPHIL_DN                                            | 197 | 0.30107972 | 13.879.592 | 0.023195876 | 0.034923    | 1.0 |
| GSE3337_CTRL_VS_4H_IFNG_IN_CD8POS_DC_UP                                    | 195 | 0.2987035  | 13.878.407 | 0.01632653  | 0.034957636 | 1.0 |
| GSE12198_CTRL_VS_HIGH_IL2_STIM_NK_CELL_UP                                  | 194 | 0.29821748 | 1.387.654  | 0.017925736 | 0.035008848 | 1.0 |
| GSE7460_FOXP3_MUT_VS_WT_ACT_TCONV_DN                                       | 190 | 0.30215046 | 13.870.746 | 0.014360313 | 0.03522841  | 1.0 |
| GSE37301_PRO_BCELL_VS_CD4_TCELL_UP                                         | 162 | 0.30630717 | 1.386.851  | 0.018741634 | 0.035260174 | 1.0 |
| GSE46606_DAY1_VS_DAY3_CD40L_IL2_IL5_STIMULATED_IRF4MID_BCELL_DN            | 193 | 0.30164114 | 13.868.953 | 0.019788919 | 0.035263855 | 1.0 |
| GSE29617_CTRL_VS_TIV_FLU_VACCINE_BCELL_2008_UP                             | 170 | 0.30359077 | 13.869.146 | 0.024804177 | 0.03527288  | 1.0 |
| GSE3982_CTRL_VS_PMA_STIM_EOSINOPHIL_DN                                     | 190 | 0.29743674 | 13.864.594 | 0.02008032  | 0.035396658 | 1.0 |
| GSE29618_PRE_VS_DAY7_POST_LAIV_FLU_VACCINE_MDC_DN                          | 185 | 0.30241024 | 13.862.114 | 0.02016129  | 0.03545184  | 1.0 |
| GSE17721_CTRL_VS_CPG_4H_BMDM_DN                                            | 197 | 0.30018607 | 13.862.115 | 0.013071896 | 0.035471067 | 1.0 |
| GSE17721_LPS_VS_GARDIQUIMOD_24H_BMDM_UP                                    | 191 | 0.30080652 | 13.859.261 | 0.012080537 | 0.035555996 | 1.0 |
| GSE10211_UV_INACT_SENDAI_VS_LIVE_SENDAI_VIRUS_TRACHEAL_EPITHELIAL_CELLS_UP | 141 | 0.31208023 | 13.851.575 | 0.039617486 | 0.035863    | 1.0 |
| GSE46242_TH1_VS_ANERGIC_TH1_CD4_TCELL_UP                                   | 183 | 0.30207485 | 13.851.839 | 0.019788919 | 0.035870112 | 1.0 |
| KAECH_DAY8_EFF_VS_MEMORY_CD8_TCELL_DN                                      | 196 | 0.3015577  | 13.846.703 | 0.014531043 | 0.036057852 | 1.0 |
| GSE43955_TH0_VS_TGFB_IL6_IL23_TH17_ACT_CD4_TCELL_52H_DN                    | 195 | 0.29880133 | 13.834.884 | 0.020215634 | 0.03649937  | 1.0 |
| GSE29615_CTRL_VS_DAY7_LAIV_FLU_VACCINE_PBMIC_UP                            | 165 | 0.30608737 | 13.830.428 | 0.04199475  | 0.03666919  | 1.0 |
| GSE22886_NAIVE_CD4_TCELL_VS_NKCELL_UP                                      | 186 | 0.30084628 | 13.827.124 | 0.01997337  | 0.036797192 | 1.0 |
| GSE26928_NAIVE_VS_EFF_MEMORY_CD4_TCELL_DN                                  | 183 | 0.30155337 | 13.825.065 | 0.024804177 | 0.036883157 | 1.0 |
| GSE27786_LIN_NEG_VS_MONO_MAC_DN                                            | 192 | 0.29965237 | 1.382.332  | 0.01591512  | 0.03694037  | 1.0 |
| GSE1460_CD4_THYMOCYTE_VS_NAIVE_CD4_TCELL_ADULT_BLOOD_UP                    | 190 | 0.3001223  | 13.821.805 | 0.023346303 | 0.036972255 | 1.0 |
| GSE41176_UNSTIM_VS_ANTI_IGM_STIM_BCELL_6H_DN                               | 192 | 0.2993787  | 13.822.228 | 0.022368422 | 0.03697304  | 1.0 |
| GSE31082_DP_VS_CD4_SP_THYMOCYTE_DN                                         | 191 | 0.30024332 | 1.382.124  | 0.014416776 | 0.036975168 | 1.0 |
| GSE3039_ALPHABETA_CD8_TCELL_VS_B1_BCELL_UP                                 | 194 | 0.2988525  | 13.813.928 | 0.010256411 | 0.03728918  | 1.0 |
| GSE5503_PLN_DC_VS_SPLEEN_DC_ACTIVATED_ALLOGENIC_TCELL_DN                   | 193 | 0.29761526 | 13.811.338 | 0.024739584 | 0.03738096  | 1.0 |
| GSE2706_R848_VS_R848_AND_LPS_8H_STIM_DC_DN                                 | 177 | 0.30467477 | 13.809.826 | 0.022666667 | 0.037418593 | 1.0 |
| GSE14308_TH2_VS_TH1_DN                                                     | 194 | 0.29930878 | 1.380.853  | 0.018348623 | 0.03742859  | 1.0 |
| GSE16522_ANTI_CD3CD28_STIM_VS_UNSTIM_MEMORY_CD8_TCELL_DN                   | 189 | 0.29815513 | 13.808.551 | 0.029639175 | 0.037448704 | 1.0 |
| GSE17721_POLYIC_VS_CPG_2H_BMDM_DN                                          | 193 | 0.29948157 | 13.802.493 | 0.014102564 | 0.037674893 | 1.0 |
| GSE9988_ANTI_TREM1_VS_CTRL_TREATED_MONOCYTES_UP                            | 184 | 0.30186456 | 1.379.753  | 0.026350461 | 0.03788143  | 1.0 |
| GSE21033_1H_VS_24H_POLYIC_STIM_DC_DN                                       | 157 | 0.3052584  | 13.796.585 | 0.028767124 | 0.037898157 | 1.0 |
| GSE9037_WT_VS_IRAK4_KO_LPS_4H_STIM_BMDM_DN                                 | 195 | 0.2978566  | 13.796.115 | 0.023746701 | 0.03790316  | 1.0 |
| GSE17186_NAIVE_VS_CD21LOW_TRANSITIONAL_BCELL_CORD_BLOOD_DN                 | 196 | 0.30090255 | 13.795.387 | 0.018041236 | 0.0379103   | 1.0 |
| GSE37605_C57BL6_VS_NOD_FOXP3_FUSION_GFP_TREG_DN                            | 182 | 0.30470642 | 13.789.531 | 0.021136064 | 0.038195487 | 1.0 |

|                                                                               |     |            |            |             |             |     |
|-------------------------------------------------------------------------------|-----|------------|------------|-------------|-------------|-----|
| GSE25123_CTRL_VS_IL4_STIM_MACROPHAGE_DN                                       | 191 | 0.29641646 | 13.784.895 | 0.019710906 | 0.038398392 | 1.0 |
| GSE35543_IN_VITRO_ITREG_VS_CONVERTED_EX_ITREG_DN                              | 191 | 0.2990061  | 13.781.711 | 0.015604681 | 0.038527627 | 1.0 |
| GSE27786_BCELL_VS_NKTCCELL_DN                                                 | 192 | 0.29850122 | 13.778.136 | 0.022106633 | 0.038677253 | 1.0 |
| GSE18804_SPLEEN_MACROPHAGE_VS_COLON_TUMORAL_MACROPHAGE_DN                     | 191 | 0.2971961  | 13.777.632 | 0.020806242 | 0.0386824   | 1.0 |
| GSE40685_NAIVE_CD4_TCELL_VS_FOXP3_KO_TREG_PRECURSOR_DN                        | 183 | 0.3033283  | 13.776.336 | 0.014230272 | 0.038722288 | 1.0 |
| GSE15215_CD2_POS_VS_NEG_PDC_UP                                                | 187 | 0.30040878 | 13.772.852 | 0.017925736 | 0.038873095 | 1.0 |
| GSE369_PRE_VS_POST_IL6_INJECTION_IFNG_KO_LIVER_DN                             | 193 | 0.30229935 | 13.776.672 | 0.019946808 | 0.039139476 | 1.0 |
| GSE24574_BCL6_HIGH_TFH_VS_TCONV_CD4_TCELL_UP                                  | 193 | 0.2972523  | 13.762.447 | 0.02035278  | 0.039290898 | 1.0 |
| GSE6269_FLU_VS_STREP_PNEUMO_INF_PBMC_UP                                       | 162 | 0.30304998 | 13.762.758 | 0.023841059 | 0.039298188 | 1.0 |
| GSE2585_AIRE_KO_VS_WT_CD80_LOW_MTEC_DN                                        | 196 | 0.29646906 | 13.761.605 | 0.015345269 | 0.03931407  | 1.0 |
| KAECH_DAY15_EFF_VS_MEMORY_CD8_TCELL_DN                                        | 197 | 0.29795587 | 1.375.828  | 0.012690355 | 0.039448306 | 1.0 |
| GSE360_LOW_DOSE_B_MALAYI_VS_M_TUBERCULOSIS_DC_UP                              | 198 | 0.2969694  | 13.754.417 | 0.012       | 0.039611917 | 1.0 |
| GSE40274_LEF1_VS_FOXP3_AND_LEF1_TRANSDUCED_ACTIVATED_CD4_TCELL_UP             | 198 | 0.29836562 | 13.750.255 | 0.02116402  | 0.039780457 | 1.0 |
| GSE360_CTRL_VS_B_MALAYI_HIGH_DOSE_DC_UP                                       | 189 | 0.29839003 | 13.746.976 | 0.019430052 | 0.03989759  | 1.0 |
| GSE37301_LYMPHOID_PRIMED_MPP_VS_CD4_TCELL_UP                                  | 183 | 0.30153427 | 13.740.107 | 0.02075227  | 0.040192965 | 1.0 |
| GSE15330_MEGAKARYOCYTE_ERYTHROID_PROGENITOR_VS_PRO_BCELL_UP                   | 191 | 0.29790366 | 13.738.359 | 0.02312925  | 0.04024591  | 1.0 |
| GSE17721_POLYIC_VS_GARDIQUIMOD_0.5H_BMDM_UP                                   | 191 | 0.30134916 | 13.733.777 | 0.010568032 | 0.040452376 | 1.0 |
| GSE23321_CD8_STEM_CELL_MEMORY_VS_EFFECTOR_MEMORY_CD8_TCELL_UP                 | 198 | 0.29550612 | 13.732.362 | 0.027704485 | 0.040488433 | 1.0 |
| GSE20715_WT_VS_TLR4_KO_24H_OZONE_LUNG_UP                                      | 195 | 0.29591933 | 13.730.601 | 0.022457067 | 0.040562995 | 1.0 |
| GSE29615_CTRL_VS_LAIV_FLU_VACCINE_PBMC_DN                                     | 145 | 0.30726495 | 13.727.944 | 0.03021978  | 0.04066683  | 1.0 |
| GOLDRATH_NAIVE_VS_EFF_CD8_TCELL_UP                                            | 197 | 0.29714894 | 13.724.145 | 0.02356021  | 0.04082785  | 1.0 |
| GSE24726_WT_VS_E2-2_KO_PDC_DN                                                 | 195 | 0.29638678 | 13.720.838 | 0.016883116 | 0.040957667 | 1.0 |
| GSE20715_WT_VS_TLR4_KO_LUNG_DN                                                | 189 | 0.29799202 | 1.372.087  | 0.028985508 | 0.040976208 | 1.0 |
| GSE7460_CTRL_VS_TGFB_TREATED_ACT_FOXP3_MUT_TCONV_UP                           | 195 | 0.29577404 | 13.719.624 | 0.019633507 | 0.040976293 | 1.0 |
| GSE32034_UNTREATED_VS_ROSIGLITAZONE_TREATED_LY6C_HIGH_MONOCYTE_UP             | 193 | 0.29469004 | 13.720.003 | 0.018018018 | 0.040980782 | 1.0 |
| GSE4142_NAIVE_VS_MEMORY_BCELL_UP                                              | 193 | 0.29839745 | 13.717.567 | 0.019283747 | 0.041057132 | 1.0 |
| GSE39820_CTRL_VS_IL1B_IL6_CD4_TCELL_UP                                        | 194 | 0.29978022 | 13.716.956 | 0.017127799 | 0.04106558  | 1.0 |
| GSE17721_CTRL_VS_LPS_12H_BMDM_DN                                              | 192 | 0.2966457  | 13.712.643 | 0.020408163 | 0.04126534  | 1.0 |
| GSE7831_CPG_VS_INFLUENZA_STIM_PDC_1H_UP                                       | 197 | 0.29345274 | 13.705.268 | 0.019430052 | 0.041617043 | 1.0 |
| GSE16385_MONOCYTE_VS_12H_IFNG_TNF_TREATED_MACROPHAGE_DN                       | 190 | 0.2945404  | 13.701.835 | 0.015345269 | 0.04176228  | 1.0 |
| GSE7460_TREG_VS_TCONV_ACT_DN                                                  | 188 | 0.29882997 | 1.370.107  | 0.02008032  | 0.04178645  | 1.0 |
| GSE13306_TREG_VS_TCONV_UP                                                     | 190 | 0.2965498  | 13.694.437 | 0.01270648  | 0.042088658 | 1.0 |
| GSE8835_HEALTHY_VS_CLL_CD4_TCELL_DN                                           | 188 | 0.29597872 | 13.693.922 | 0.020833334 | 0.042096518 | 1.0 |
| GSE15330_LYMPHOID_MULTIPOTENT_VS_PRO_BCELL_DN                                 | 191 | 0.2973196  | 13.689.505 | 0.019710906 | 0.04228309  | 1.0 |
| GSE18281_CORTICAL_VS_MEDULLARY_THYMOCYTE_DN                                   | 192 | 0.29950735 | 13.688.897 | 0.020942409 | 0.04229248  | 1.0 |
| GSE17721_LPS_VS_PAM3CSK4_16H_BMDM_UP                                          | 192 | 0.2961489  | 13.683.437 | 0.028795812 | 0.042490724 | 1.0 |
| GSE1432_6H_VS_24H_IFNG_MICROGLIA_UP                                           | 196 | 0.29720342 | 13.684.222 | 0.02356021  | 0.042499125 | 1.0 |
| GSE360_L_MAJOR_VS_B_MALAYI_LOW_DOSE_MAC_UP                                    | 185 | 0.2975519  | 13.683.568 | 0.019505851 | 0.042506292 | 1.0 |
| GSE19888_ADENOSINE_A3R_INH_VS_ACT_WITH_INHIBITOR_PRETREATMENT_IN_MAST_CELL_DN | 195 | 0.29728845 | 13.680.478 | 0.02610966  | 0.042634334 | 1.0 |
| GSE17721_PAM3CSK4_VS_CPG_2H_BMDM_DN                                           | 194 | 0.29508668 | 13.675.629 | 0.02642008  | 0.04286544  | 1.0 |
| GSE339_EX_VIVO_VS_IN_CULTURE_CD8POS_DC_DN                                     | 197 | 0.29758832 | 13.672.578 | 0.028423773 | 0.042990573 | 1.0 |
| GSE15735_2H_VS_12H_HDAC_INHIBITOR_TREATED_CD4_TCELL_DN                        | 196 | 0.29236817 | 13.669.757 | 0.027954256 | 0.04311307  | 1.0 |
| GSE3720_UNSTIM_VS_PMA_STIM_VD2_GAMMADELTA_TCELL_DN                            | 193 | 0.2944881  | 13.667.598 | 0.014230272 | 0.043171924 | 1.0 |
| GSE20715_WT_VS_TLR4_KO_6H_OZONE_LUNG_UP                                       | 193 | 0.29697207 | 1.365.826  | 0.010526316 | 0.043628164 | 1.0 |
| GSE8685_IL15_ACT_IL2_STARVED_VS_IL21_ACT_IL2_STARVED_CD4_TCELL_UP             | 158 | 0.3034821  | 13.657.205 | 0.03155007  | 0.04366615  | 1.0 |
| GSE30083_SP1_VS_SP2_THYMOCYTE_UP                                              | 192 | 0.296166   | 13.656.151 | 0.016949153 | 0.043701947 | 1.0 |
| GSE2826_XID_VS_BTK_KO_BCELL_DN                                                | 197 | 0.2935133  | 13.653.218 | 0.016993465 | 0.043836575 | 1.0 |
| GSE1925_CTRL_VS_IFNG_PRIMED_MACROPHAGE_24H_IFNG_STIM_UP                       | 193 | 0.2942798  | 13.651.503 | 0.02389937  | 0.043900102 | 1.0 |
| GSE15930_NAIVE_VS_24H_IN_VITRO_STIM_INFAB_CD8_TCELL_UP                        | 198 | 0.2927151  | 13.644.428 | 0.014492754 | 0.044234473 | 1.0 |
| GSE360_DC_VS_MAC_DN                                                           | 190 | 0.2952416  | 13.642.157 | 0.025740026 | 0.044311117 | 1.0 |
| GSE17721_LPS_VS_CPG_6H_BMDM_UP                                                | 195 | 0.2947706  | 13.642.222 | 0.01965924  | 0.044330135 | 1.0 |
| GSE22935_UNSTIM_VS_48H_MBOVIS_BCG_STIM_MYD88_KO_MACROPHAGE_UP                 | 191 | 0.29641715 | 13.636.396 | 0.016172506 | 0.044596463 | 1.0 |
| GSE23505_UNTREATED_VS_4DAY_IL6_IL1_TGFB_TREATED_CD4_TCELL_UP                  | 194 | 0.29426527 | 1.363.652  | 0.022193212 | 0.04461455  | 1.0 |
| GSE40666_STAT1_KO_VS_STAT4_KO_CD8_TCELL_WITH_IFNA_STIM_90MIN_DN               | 161 | 0.3030732  | 13.634.762 | 0.026737968 | 0.04466042  | 1.0 |
| GSE7831_UNSTIM_VS_CPG_STIM_PDC_4H_UP                                          | 197 | 0.29690447 | 13.630.649 | 0.022457067 | 0.044840116 | 1.0 |
| GSE22601_DOUBLE_NEGATIVE_VS_DOUBLE_POSITIVE_THYMOCYTE_DN                      | 197 | 0.2928188  | 1.362.997  | 0.017832648 | 0.04485316  | 1.0 |
| GSE13887_ACT_CD4_VS_NO_TREATED_CD4_TCELL_DN                                   | 121 | 0.31214198 | 1.362.746  | 0.047210302 | 0.044964537 | 1.0 |
| GSE39110_DAY3_VS_DAY6_POST_IMMUNIZATION_CD8_TCELL_WITH_IL2_TREATMENT_DN       | 190 | 0.29532298 | 13.625.615 | 0.02075227  | 0.045044526 | 1.0 |
| GSE19772_CTRL_VS_HCMV_INF_MONOCYTES_AND_PI3K_INHIBITION_DN                    | 199 | 0.29600957 | 13.624.957 | 0.022427442 | 0.045056395 | 1.0 |
| GSE30971_2H_VS_4H_LPS_STIM_MACROPHAGE_WBP7_KO_DN                              | 192 | 0.2976217  | 1.361.542  | 0.022339027 | 0.045541145 | 1.0 |
| GSE11884_WT_VS_FURIN_KO_NAIVE_CD4_TCELL_UP                                    | 133 | 0.30879495 | 1.361.337  | 0.03561644  | 0.045626305 | 1.0 |
| GSE17721_LPS_VS_CPG_12H_BMDM_DN                                               | 194 | 0.2917836  | 13.608.618 | 0.02425876  | 0.04585241  | 1.0 |
| GSE14699_NAIVE_VS_ACT_CD8_TCELL_UP                                            | 191 | 0.2924113  | 13.607.004 | 0.022849463 | 0.045915425 | 1.0 |
| GSE6269_STAPH_AUREUS_VS_STREP_PNEUMO_INF_PBMC_DN                              | 169 | 0.29789004 | 13.603.591 | 0.02872777  | 0.046060443 | 1.0 |
| GSE17721_LPS_VS_PAM3CSK4_4H_BMDM_UP                                           | 194 | 0.29530784 | 13.600.088 | 0.023622047 | 0.04623642  | 1.0 |
| GSE5542_IFNG_VS_IFNA_TREATED_EPITHELIAL_CELLS_6H_DN                           | 191 | 0.2929989  | 13.599.074 | 0.024707412 | 0.046270594 | 1.0 |
| GSE10463_CD40L_AND_VA347_VS_CD40L_IN_DC_DN                                    | 163 | 0.30016515 | 13.595.817 | 0.032742154 | 0.046415742 | 1.0 |
| GSE25088_CTRL_VS_IL4_AND_ROSIGLITAZONE_STIM_MACROPHAGE_UP                     | 183 | 0.29232372 | 13.593.946 | 0.036       | 0.046478726 | 1.0 |
| GSE17721_4_VS_24H_CPG_BMDM_UP                                                 | 194 | 0.29576132 | 13.594.186 | 0.018893387 | 0.046491552 | 1.0 |
| GSE3720_VD1_VS_VD2_GAMMADELTA_TCELL_DN                                        | 195 | 0.2917227  | 13.585.789 | 0.011734028 | 0.04687959  | 1.0 |
| GSE22025_UNTREATED_VS_PROGESTERONE_TREATED_CD4_TCELL_DN                       | 195 | 0.292446   | 13.585.998 | 0.014360313 | 0.046895616 | 1.0 |
| GSE26488_WT_VS_VP16_TRANSGENIC_HDAC7_KO_DOUBLE_POSITIVE_THYMOCYTE_UP          | 193 | 0.29313213 | 13.583.627 | 0.027704485 | 0.046992507 | 1.0 |
| GSE18791_UNSTIM_VS_NEWCATSLE_VIRUS_DC_2H_UP                                   | 157 | 0.30009425 | 13.567.935 | 0.03256445  | 0.047831904 | 1.0 |
| GSE3920_UNTREATED_VS_IFNB_TREATED_ENDOTHELIAL_CELL_UP                         | 190 | 0.29439682 | 1.355.694  | 0.023407022 | 0.04838813  | 1.0 |
| GSE14415_FOXP3_KO_NATURAL_TREG_VS_TCONV_DN                                    | 167 | 0.30019534 | 13.557.236 | 0.03396739  | 0.048400383 | 1.0 |
| GSE4748_CTRL_VS_LPS_AND_CYANOBACTERIUM_LPDLIKE_STIM_DC_3H_DN                  | 200 | 0.29354924 | 13.553.518 | 0.01884253  | 0.04854711  | 1.0 |
| GSE23308_CTRL_VS_CORTICOSTERONE_TREATED_MACROPHAGE_DN                         | 195 | 0.29490003 | 1.355.178  | 0.017402945 | 0.04859346  | 1.0 |
| GSE360_CTRL_VS_B_MALAYI_LOW_DOSE_DC_UP                                        | 193 | 0.2971614  | 1.355.207  | 0.022849463 | 0.048602745 | 1.0 |
| GSE36888_UNTREATED_VS_IL2_TREATED_STAT5_AB_KNOCKIN_TCELL_17H_DN               | 197 | 0.29382417 | 13.549.703 | 0.029372497 | 0.048671726 | 1.0 |
| GSE9946_MATURE_STIMULATORY_VS_PROSTAGLANDINE2_TREATED_MATURE_DC_DN            | 122 | 0.3130118  | 13.548.348 | 0.050946143 | 0.0487206   | 1.0 |
| GSE10273_HIGH_IL7_VS_HIGH_IL7_AND_IRF4_IN_IRF4_8_NULL_PRE_BCELL_DN            | 194 | 0.2917976  | 13.544.092 | 0.022486772 | 0.048945397 | 1.0 |
| GSE3203_WT_VS_IFNAR1_KO_INFLUENZA_INFECTED_LN_BCELL_UP                        | 191 | 0.29203016 | 13.542.136 | 0.028947368 | 0.04904309  | 1.0 |
| GSE32423_CTRL_VS_IL7_IL4_MEMORY_CD8_TCELL_UP                                  | 199 | 0.29041103 | 13.535.445 | 0.019946808 | 0.04938192  | 1.0 |
| GSE17721_LPS_VS_PAM3CSK4_8H_BMDM_UP                                           | 194 | 0.29231793 | 13.533.559 | 0.022929937 | 0.049463052 | 1.0 |
| GSE25088_CTRL_VS_IL4_STIM_MACROPHAGE_DN                                       | 188 | 0.2924724  | 13.530.157 | 0.023529412 | 0.04962391  | 1.0 |
| GSE45365_NK_CELL_VS_CD8A_DC_UP                                                | 198 | 0.29220515 | 13.528.203 | 0.026246719 | 0.049719475 | 1.0 |
| GSE40666_STAT1_KO_VS_STAT4_KO_CD8_TCELL_DN                                    | 157 | 0.30132398 | 1.352.674  | 0.036885247 | 0.049779207 | 1.0 |
